# Supplementary material for: A brain-specific pgc1α fusion transcript affects gene expression and behavioural outcomes in mice
Source: Life Sci Alliance. 2021 Oct 14;4(12):e202101122. doi: 10.26508/lsa.202101122 (PMC8548212; doi:10.26508/lsa.202101122)
Supplement: Supplementary file 1 [file LSA-2021-01122_TableS1.xlsx]

## Sheet: Summary - and long reads
LENGTH_BIN (bp)	Number of inserts (total)	LENGTH_BIN (bp)	Number of inserts (Pgc1a)
1-500	4653	1-500	2387
501-1000	9302	501-1000	4505
1001-1500	3964	1001-1500	2069
1501-2000	825	1501-2000	485
2001-2500	177	2001-2500	120
2501-3000	119	2501-3000	110
3001-3500	14	3001-3500	12
3501-4000	1	3501-4000	1
4001-4500	4	4001-4500	4
4501-5000	1	4501-5000	1
5001-5500	1
Total number of sequences	19061
Category	Inserts > 2Kb
	number of reads aligning to contiguous message
Canonical (Exon1-Exon2)	43
SSR-SINE-Exon2	55
SSR-Exon2	2

## Sheet: shorter reads analysis
Reads aligned on artificialy generated pairs of exons in Pgc1-a; data include the absolute read count and the average coverage on each exon.
exon-pairs	canonical exon pairs	Upstream exon length [bp]	Downstream exon length [bp]	Number of aligned reads (non-unique)	Average length of aligned reads [bp]	Average reads coverage 5' exon [%]	Average reads coverage 3' exon [%]
1-2	yes	49	181	61	384.426	98.2937	90.7255
2-3	yes	181	192	1967	687.327	97.9667	98.1264
2-3	yes	181	88	26	255.269	88.9503	96.4161
2-4	no	181	127	4	461	100	98.622
2-11	no	181	123	96	658.958	99.6489	99.0346
2-12	no	181	153	15	394.8	86.593	99.6514
3-4	yes	192	127	1034	380.9	95.4384	95.8863
3-5	no	192	206	400	534.173	98.1068	98.4988
3-7	no	192	75	1	317	100	100
3-8	no	192	917	3	1227.67	100	72.9189
4-5	yes	127	206	1485	453.131	98.1182	95.1486
4-8	no	127	917	2	1067	100	99.6728
5-6	yes	206	47	212	318.637	82.6823	97.4809
5-7	no	206	75	374	327.679	97.151	98.3173
5-8	no	206	917	335	1284.77	100	55.3424
5-11	no	206	123	9	292.778	64.9946	99.5483
5-13	no	206	102	59	242.254	75.687	85.344
6-7	yes	47	75	73	131.137	95.7738	98.4475
7-8	yes	75	917	1122	1126.34	99.3892	57.8813
7-11	no	75	123	4	199.25	99	98.5772
8-9	yes	917	106	36865	955.559	76.8655	97.7949
8-10	no	917	122	1628	701.701	58.907	98.913
8-11	no	917	123	92	723.293	63.1596	98.0028
8-12	no	917	153	29	855.034	71.5827	99.2788
9-10	yes	106	122	19045	267.667	96.3204	98.0347
9-11	no	106	123	518	352.701	99.8161	98.9312
10-11	yes	122	123	37987	302.279	96.018	98.4103
10-12	no	122	153	1854	405.422	99.1392	98.0974
11-12	yes	123	153	60729	477.135	98.2317	98.3718
11-13	no	123	102	128	244.977	90.3392	87.186
12-13	yes	153	102	48627	327.365	98.1986	92.4149
			Total	214784	482.123	93.6513	96.5757

## Sheet: shorter reads - SINE-exon2
Shorter reads with evidence of the SINE-exon2 mRNA
SINE length [bp]	94
Exon 2 lenth [bp]	181
Number of aligned reads	6
Average length of aligned reads [bp]	258.5
Shorter reads with evidence of the SSR-SINE-exon2 mRNA
SSR length [bp]	75
SINE length [bp]	94
Exon 2 length [bp]	181
Number of aligned reads	1
Average length of aligned reads [bp]	632
