# Supplementary material for: A brain-specific pgc1α fusion transcript affects gene expression and behavioural outcomes in mice
Source: Life Sci Alliance. 2021 Oct 14;4(12):e202101122. doi: 10.26508/lsa.202101122 (PMC8548212; doi:10.26508/lsa.202101122)
Supplement: Supplementary file 5 [file LSA-2021-01122_TableS5.xlsx]

## Sheet: GDS2391
ID	!Sample_source_name_ch1	WT striatum	WT striatum	WT striatum	PGC-1a KO mouse striatum	PGC1-a KO striatum	PGC1-a KO striatum
	ID_REF	GSM135225	GSM135226	GSM135227	GSM135217	GSM135219	GSM135221	Fold change KO/WT	log2(KO/WT)	P (t-test)	Gene Title	Gene Symbol
2635	1418304_at	39.9	40.3	62.3	380	396.6	388.1	8.17333	3.03092	2.67829e-06	cadherin-related family member 1	Cdhr1
18930	1434624_x_at	98.3	107.4	127.9	920.8	854.9	851.9	7.8765	2.97755	5.90768e-06	ribosomal protein S9	Rps9
18350	1434044_at	229.5	228.9	228.9	246.3	248.2	247.3	1.0793	0.11009	6.36583e-06	replication initiator 1	Repin1
18406	1434100_x_at	251.5	245.5	263.6	90.1	106.9	96.5	-2.59148	-1.37378	2.75272e-05	peroxisome proliferative activated receptor, gamma, coactivator 1 alpha	Ppargc1a
25598	1441292_at	10.1	11.5	11.1	1.7	2	2	-5.73684	-2.52026	3.02788e-05
34250	1449955_at	20.9	19.9	22.5	5	5.4	4.9	-4.13725	-2.04867	3.20935e-05	calcium channel, voltage-dependent, alpha 1F subunit	Cacna1f
3658	1419327_at	250.5	253.4	217.8	2.5	14.6	17	-21.1642	-4.40356	4.82651e-05	pyridoxal-dependent decarboxylase domain containing 1	Pdxdc1
14570	1430264_at	85.4	87.3	85.3	122.9	116.7	121.3	1.39884	0.484228	6.37399e-05	RIKEN cDNA 2610030P05 gene	2610030P05Rik
212	1415881_at	2654.8	2509.6	2494.9	1568.5	1644.3	1610.5	-1.58798	-0.667192	6.98595e-05	growth hormone inducible transmembrane protein	Ghitm
17429	1433123_at	29.1	25.5	26.2	4.2	4.5	6.5	-5.31579	-2.41028	7.71723e-05	RIKEN cDNA 2900069G24 gene	2900069G24Rik
28954	1444648_at	7.2	6.8	7.7	3	2.9	2.8	-2.49425	-1.31861	8.39174e-05	family with sequence similarity 178, member B	Fam178b
213	1415882_at	2510.6	2554.9	2231.4	764.7	808.6	759	-3.12863	-1.64553	8.59805e-05	growth hormone inducible transmembrane protein	Ghitm
26974	1442668_at	19.7	18.2	17.1	1.3	0.6	3	-11.2245	-3.48858	8.69895e-05
37000	1452705_at	160	171	163	334.7	308.6	340.2	1.99089	0.993414	9.22586e-05	pyridoxal-dependent decarboxylase domain containing 1	Pdxdc1
7456	1423150_at	3015.8	3037.7	2868.9	1863.6	1956.4	1800.5	-1.58747	-0.666733	9.39812e-05	secretogranin V	Scg5
40958	1456663_x_at	362.9	366.4	336.2	177.4	168.1	189.8	-1.99047	-0.993111	0.000101824	TM2 domain containing 2	Tm2d2
6006	1421700_at	1.1	1.4	1.1	11.5	14	13.5	10.8333	3.43741	0.000105921	testis expressed gene 16	Tex16
16528	1432222_at	16.1	15.9	15	5.1	4	2.7	-3.98305	-1.99387	0.000109116	RIKEN cDNA A930015G24 gene	A930015G24Rik
31406	1447100_s_at	51.8	38.8	42	211.8	199.1	179.9	4.45551	2.15559	0.000109874	RIKEN cDNA 5730508B09 gene	5730508B09Rik
28171	1443865_at	180.6	187.3	212.2	349.1	358.1	368.5	1.85434	0.890902	0.000119882	gamma-aminobutyric acid (GABA) A receptor, subunit alpha 2	Gabra2
18064	1433758_at	263	285.2	277.5	150.5	166.9	156.8	-1.74125	-0.800122	0.000131037	nischarin	Nisch
18522	1434216_a_at	651.2	630.2	690	357.3	388.1	366.1	-1.77364	-0.826713	0.000131487	nudix (nucleoside diphosphate linked moiety X)-type motif 19	Nudt19
35159	1450864_at	504.6	469.6	473.4	664.7	691.8	681.9	1.40812	0.493774	0.000133164	calmodulin 1 /// calmodulin 2 /// calmodulin 3	Calm1 /// Calm2 /// Calm3
5445	1421139_a_at	245.6	255.3	246.5	182.8	169.7	181.1	-1.40067	-0.486122	0.000157682	zinc finger protein 386 (Kruppel-like)	Zfp386
5933	1421627_at	6.5	6	6	3.2	2.9	3.4	-1.94737	-0.961526	0.000170813	even skipped homeotic gene 1 homolog	Evx1
33093	1448793_a_at	139.9	130	134.5	332.3	370.5	390.2	2.70277	1.43444	0.000183789	syndecan 4	Sdc4
17868	1433562_s_at	5154	5098.7	4977.4	4247.5	4097.5	4130.5	-1.2208	-0.287828	0.000186626	ATP synthase, H+ transporting, mitochondrial F0 complex, subunit B1	Atp5f1
31410	1447104_at	28.8	29.1	28.3	12.5	8.3	12	-2.62805	-1.39399	0.00018834
27888	1443582_at	23.4	23.9	23.2	4.8	6.9	2	-5.14599	-2.36345	0.000190371	growth arrest-specific 2 like 2	Gas2l2
36636	1452341_at	434.7	457.3	448	339.9	348	331.4	-1.31463	-0.394654	0.000192519	enoyl Coenzyme A hydratase, short chain, 1, mitochondrial	Echs1
1524	1417193_at	743.3	755.7	734.8	549.5	581.3	537.9	-1.33865	-0.420775	0.000193019	superoxide dismutase 2, mitochondrial	Sod2
18236	1433930_at	20.2	17.4	19.1	2.2	2.1	4.9	-6.16304	-2.62364	0.0002077	heparanase	Hpse
12082	1427776_a_at	8.5	9.1	7.7	1.9	0.6	1.4	-6.48718	-2.69759	0.000210932	fibroblast growth factor receptor 4	Fgfr4
43887	1459592_a_at	63.4	60.5	60.3	42	37.2	38.1	-1.57033	-0.65107	0.000234266	protein phosphatase 1, regulatory (inhibitor) subunit 13 like	Ppp1r13l
6755	1422449_s_at	1531.9	1535.7	1574.5	1811	1764.2	1785.9	1.15489	0.207751	0.000236222	reticulocalbin 2	Rcn2
26871	1442565_at	41.7	45.5	44.7	61.3	64.5	64.4	1.442	0.528073	0.000240243	protocadherin 10	Pcdh10
8158	1423852_at	49.4	60.5	59.7	114.6	117.2	107.2	1.99882	0.999149	0.000266881	shisa homolog 2 (Xenopus laevis)	Shisa2
44764	1460472_at	5.2	4.4	3.9	34.3	30.2	38.7	7.64444	2.93441	0.000272807	cyclin-dependent kinase 3, pseudogene	Cdk3-ps
4115	1419784_x_at	18.7	20.1	17.6	3.2	4.6	6.4	-3.97183	-1.9898	0.00027919
41640	1457345_at	14.5	16.7	16.5	5.8	5.1	6.7	-2.71023	-1.43841	0.00028319
1703	1417372_a_at	532.8	528.3	529.7	741.1	759.5	700.7	1.38377	0.468603	0.000306772	pellino 1	Peli1
15862	1431556_at	9.4	9.4	8.7	1.4	0.6	2.7	-5.85106	-2.5487	0.000315056	RIKEN cDNA 4930435M08 gene	4930435M08Rik
19322	1435016_at	888	870.8	826.4	634.7	621.9	648.7	-1.35685	-0.440258	0.000340136	trafficking protein, kinesin binding 2	Trak2
28447	1444141_at	61.5	63.1	63.3	85.2	91.3	84.9	1.39117	0.476294	0.000345404	sorting nexin 13	Snx13
13452	1429146_at	642.9	642.2	654.3	571.2	581.3	586.2	-1.11543	-0.157601	0.000346274	small VCP/p97-interacting protein	Svip
35060	1450765_a_at	61.3	60.1	64	8.8	20.8	7.5	-4.9973	-2.32115	0.000353599	phosphodiesterase 6H, cGMP-specific, cone, gamma	Pde6h
4412	1420093_s_at	1041.3	1066.4	1055.9	940.7	915.6	910.6	-1.14337	-0.193297	0.000363364	heterogeneous nuclear ribonucleoprotein D-like	Hnrnpdl
15719	1431413_at	36.8	28.9	41	86.1	79	80.4	2.30084	1.20216	0.000371457	receptor (calcitonin) activity modifying protein 1	Ramp1
7044	1422738_at	4.1	9.7	7.7	33.1	28.8	33.4	4.43256	2.14814	0.000371854	discoidin domain receptor family, member 2	Ddr2
23797	1439491_at	22.1	19.3	24.7	4.3	4.6	5	-4.7554	-2.24957	0.000379184	leucine rich repeat containing 38	Lrrc38
9655	1425349_a_at	148.4	172.7	173.4	72.1	62.9	72	-2.38889	-1.25634	0.000397751	myelin basic protein expression factor 2, repressor	Myef2
44487	1460194_at	402.1	400.2	445.2	220.6	173.6	200.6	-2.09734	-1.06856	0.000408	phytanoyl-CoA hydroxylase	Phyh
38648	1454353_at	4.5	3	9.7	29.7	28.9	27.6	5.01163	2.32528	0.000409821	RIKEN cDNA 4833420D23 gene	4833420D23Rik
30565	1446259_at	47.5	46.3	51.3	19.9	11.6	18.1	-2.9254	-1.54864	0.000411099
32791	1448491_at	479.4	518.6	489.7	337.5	336	304.3	-1.52148	-0.605472	0.000440707	enoyl coenzyme A hydratase 1, peroxisomal	Ech1
33589	1449289_a_at	707.6	648.4	686.2	860	866.7	867.4	1.27025	0.34511	0.000459605	beta-2 microglobulin	B2m
36759	1452464_a_at	111.7	105.2	103.6	78.3	80	76	-1.3679	-0.451967	0.000463846	methionyl aminopeptidase type 1D (mitochondrial)	Metap1d
41683	1457388_at	14.6	17.7	13.9	2.2	3.3	2.1	-6.07895	-2.60382	0.000470873	RIKEN cDNA A830080L01 gene	A830080L01Rik
351	1416020_a_at	1206.1	1151.5	1165.6	960.3	961	916.8	-1.24139	-0.311961	0.000481398	ATP synthase, H+ transporting, mitochondrial F0 complex, subunit C1 (subunit 9)	Atp5g1
18617	1434311_at	232.5	229	229.5	246.2	249.9	250.9	1.08104	0.112423	0.000487464	CCR4-NOT transcription complex, subunit 6-like	Cnot6l
7426	1423120_at	284.6	276.6	266.2	172.9	170.2	194.4	-1.53935	-0.62232	0.000489918	insulin degrading enzyme	Ide
32202	1447896_s_at	2855.2	2915.3	2814.1	2317.2	2265.9	2410.1	-1.22756	-0.295798	0.000498229	small nucleolar RNA host gene 8 /// small nucleolar RNA, H/ACA box 24	Snhg8 /// Snora24
17558	1433252_at	20.8	16.7	16	2.5	2.3	2.4	-7.43056	-2.89347	0.000500874	RIKEN cDNA 4932703K07 gene	4932703K07Rik
42231	1457936_at	138.5	131.4	142.2	298.5	323.6	362.2	2.3885	1.2561	0.000530875	mitogen-activated protein kinase 8	Mapk8
38165	1453870_at	16.6	15.5	18.1	5.3	4.2	1.8	-4.44248	-2.15136	0.000532741	RIKEN cDNA 1810018F18 gene	1810018F18Rik
948	1416617_at	165.8	179.4	175.4	115.1	124.8	112	-1.4794	-0.56501	0.000545803	acyl-CoA synthetase short-chain family member 1	Acss1
19446	1435140_at	438.4	414.9	450.6	294.2	266.2	251.8	-1.60539	-0.682926	0.000546207	insulin degrading enzyme	Ide
4145	1419814_s_at	821.2	829.7	764.3	580.8	582.6	546.9	-1.41215	-0.497893	0.000570383	S100 calcium binding protein A1	S100a1
2543	1418212_at	1021.8	1052.9	1002.1	869.4	844.8	837.1	-1.20597	-0.270198	0.000586009	oligodendrocyte myelin glycoprotein	Omg
9759	1425453_x_at	13	10.9	10.4	2.9	1.2	1.2	-6.4717	-2.69414	0.000586833	killer cell lectin-like receptor subfamily A, member 12	Klra12
40690	1456395_at	397	305	370.3	89.5	87.9	68.4	-4.36249	-2.12515	0.000611304	peroxisome proliferative activated receptor, gamma, coactivator 1 alpha	Ppargc1a
6384	1422078_at	101.3	103.3	109	137.9	135.7	130.9	1.28986	0.367214	0.000611729	thymoma viral proto-oncogene 3	Akt3
27385	1443079_at	11.3	13.5	13.8	2.5	1.9	4.1	-4.54118	-2.18307	0.000612227
26862	1442556_at	70.3	61.6	70.3	39.4	38.6	39.4	-1.72232	-0.784351	0.000630717
27387	1443081_at	6.2	3	3.9	19.5	19.4	16.2	4.20611	2.07249	0.000631749	GATA binding protein 6	Gata6
16234	1431928_at	24.5	26.3	32.4	3.3	3.8	5	-6.87603	-2.78158	0.000632102	titin-like /// titin	LOC102641264 /// Ttn
7982	1423676_at	3771.7	3811.5	3753.8	3120.5	3218.7	3312.5	-1.17461	-0.232184	0.000635646	ATP synthase, H+ transporting, mitochondrial F0 complex, subunit D	Atp5h
37428	1453133_at	2.5	3	1.2	23.6	17.3	21.3	9.28358	3.21468	0.000645118	solute carrier family 25 (mitochondrial carrier; adenine nucleotide translocator), member 31	Slc25a31
16623	1432317_at	32.8	30.8	34.5	22.5	21.7	21.2	-1.5	-0.584963	0.000655625	RIKEN cDNA 9430078K24 gene	9430078K24Rik
30521	1446215_at	29.6	28	25	42.7	40.9	41.1	1.50969	0.594248	0.000661273	zinc finger homeobox 2, opposite strand	Zfhx2os
35642	1451347_at	23	26.9	28.5	46.1	44	42.8	1.69515	0.761416	0.000664045	INO80 complex subunit E	Ino80e
43671	1459376_at	83.9	98.8	97.4	168.7	175.2	194.2	1.9211	0.941932	0.000671512
17345	1433039_at	2.7	3	2.9	1.4	0.9	0.9	-2.6875	-1.42626	0.000672594	RIKEN cDNA 4930555B11 gene	4930555B11Rik
36987	1452692_a_at	1910.1	1885.2	1899.4	1704.9	1724.9	1760	-1.09729	-0.133941	0.000674711	NADH dehydrogenase (ubiquinone) flavoprotein 2	Ndufv2
18854	1434548_at	155.2	172.3	177.7	85.7	100.2	91.5	-1.8212	-0.864887	0.00068227	serine incorporator 3	Serinc3
38527	1454232_at	56.3	58.1	47.3	14.4	11.3	19.5	-3.57743	-1.83893	0.000698343	RIKEN cDNA 9430027B09 gene	9430027B09Rik
6229	1421923_at	145.1	144.6	143.4	104.2	106.8	91.7	-1.43079	-0.516811	0.000752563	SH3-domain binding protein 5 (BTK-associated)	Sh3bp5
18099	1433793_s_at	9	3.2	14.7	49.6	42	46	5.11524	2.3548	0.000752566	nuclear receptor interacting protein 2	Nrip2
12889	1428583_at	345.7	355.2	341.6	395.1	391.8	386.6	1.12566	0.17077	0.000763311	nuclear fragile X mental retardation protein interacting protein 2	Nufip2
16085	1431779_at	2.1	2.6	2.7	6.2	7.5	6.3	2.7027	1.4344	0.000778851
7973	1423667_at	1849.7	1829.3	1791.9	2086.3	2139.9	2189.6	1.17271	0.229851	0.000780565	methionine adenosyltransferase II, alpha	Mat2a
6590	1422284_at	8.6	7.4	7.1	22.3	26.6	21.2	3.03463	1.60152	0.000788131	NK2 homeobox 9	Nkx2-9
33359	1449059_a_at	2836.1	2724	2755.6	2469.2	2466.2	2461.7	-1.12418	-0.168878	0.000789831	3-oxoacid CoA transferase 1	Oxct1
20923	1436617_at	125.2	104.8	116.1	213.6	193.6	191.4	1.72956	0.790403	0.000793171	centrin 4	Cetn4
22851	1438545_at	454.9	429.8	482.5	292.9	254.4	246.3	-1.72278	-0.78474	0.000797455	solute carrier family 25 (mitochondrial carrier, adenine nucleotide translocator), member 5	Slc25a5
40131	1455836_at	179.8	190.7	183.6	218.4	227.3	221.4	1.20393	0.267757	0.000800121	poly (A) polymerase alpha	Papola
28337	1444031_at	4.7	0.7	1.8	15.5	15.8	13.6	6.23611	2.64065	0.000801208	calcium/calmodulin-dependent protein kinase II, delta	Camk2d
34539	1450244_a_at	151.5	152.1	152.1	121.4	107.8	116.9	-1.31667	-0.396895	0.000801388	mitogen-activated protein kinase kinase kinase kinase 2	Map4k2
18405	1434099_at	306.4	252.2	274.7	59.8	109.6	77.2	-3.37916	-1.75666	0.000802747	peroxisome proliferative activated receptor, gamma, coactivator 1 alpha	Ppargc1a
5511	1421205_at	91.2	87.4	85.7	43.5	56.5	51.7	-1.74225	-0.800955	0.000812024	ataxia telangiectasia mutated	Atm
37524	1453229_s_at	3325.6	3426.4	3213.4	2688.7	2688	2769.7	-1.22329	-0.290765	0.000837039	ubiquinol-cytochrome c reductase hinge protein	Uqcrh
21240	1436934_s_at	1792.6	1765.3	1679.7	1403.3	1315.9	1370.6	-1.28065	-0.356876	0.000843319	aconitase 2, mitochondrial	Aco2
27862	1443556_at	8.9	11.5	9	1.9	2.3	2.1	-4.66667	-2.22239	0.000854253	transmembrane protein 140	Tmem140
24778	1440472_at	6.8	8.1	9.6	1.1	0.6	0.6	-10.6522	-3.41308	0.000858696	sperm associated antigen 17	Spag17
34366	1450071_at	426.5	415.5	415.1	385.4	383.1	380	-1.09456	-0.130349	0.000866075	ash1 (absent, small, or homeotic)-like (Drosophila)	Ash1l
9433	1425127_at	4	3.2	3.7	1.4	1.6	1.4	-2.47727	-1.30875	0.000870113	hydroxy-delta-5-steroid dehydrogenase, 3 beta- and steroid delta-isomerase 2	Hsd3b2
13672	1429366_at	23.9	22.9	24.9	16.9	14.4	15	-1.5486	-0.630961	0.000873598	leucine rich repeat containing 34	Lrrc34
19154	1434848_at	764.4	766.1	749.9	847.8	885.5	873.4	1.14309	0.192938	0.000887326
350	1416019_at	117.5	107.6	113	149.9	142.9	143.1	1.28926	0.366547	0.000889216	down-regulator of transcription 1	Dr1
35535	1451240_a_at	999.4	1020.5	843.9	466.9	453.5	418.8	-2.13844	-1.09656	0.000904625	glyoxalase 1	Glo1
5655	1421349_x_at	774	761.5	800.3	617.8	644.5	654.4	-1.21866	-0.285292	0.000907296	cell cycle exit and neuronal differentiation 1	Cend1
18777	1434471_at	293.7	292.1	284.1	223.1	238.8	240.7	-1.23812	-0.308146	0.000909445	cDNA sequence BC003331	BC003331
3599	1419268_at	2.5	2.4	2.8	0.9	1.3	1	-2.40625	-1.26679	0.000909827	anterior gradient 2	Agr2
6789	1422483_a_at	2199.1	2263.4	2261.7	1922	1910.5	1812	-1.19128	-0.252517	0.000913053	cytochrome c, somatic	Cycs
18089	1433783_at	68.2	61.8	76.9	13.7	18.9	2.3	-5.92837	-2.56763	0.000950515	LIM domain binding 3	Ldb3
41034	1456739_x_at	1621.1	1595.7	1664.4	1365	1416.3	1415.2	-1.16316	-0.218049	0.000961812	armadillo repeat containing, X-linked 2	Armcx2
34057	1449758_at	4.8	4.3	4.2	2.4	2.1	1.7	-2.14516	-1.10109	0.00100013
25036	1440730_at	1	1.8	1.9	5.1	4.3	4.8	3.02128	1.59516	0.00100419
14152	1429846_at	67.1	47.9	54.8	7.2	7.5	1.1	-10.7468	-3.42584	0.00101807	RIKEN cDNA 9030411K21 gene	9030411K21Rik
41780	1457485_at	4.7	16.3	14	47.2	42.1	47.6	3.91143	1.9677	0.00101813
17893	1433587_at	120.5	116.8	118	87.2	96.7	94	-1.27852	-0.354472	0.00104242	repulsive guidance molecule family member B	Rgmb
32705	1448405_a_at	2263.1	2244.9	2284.3	1994.6	2057.8	2071.1	-1.10922	-0.149544	0.00104646	EP300 interacting inhibitor of differentiation 1	Eid1
28881	1444575_at	38.1	27.6	43.6	78	88.2	83.9	2.2882	1.19421	0.00106918
8976	1424670_s_at	269.7	276	270.2	328.3	351.1	355.4	1.26829	0.342888	0.0010809	zinc finger, FYVE domain containing 21	Zfyve21
2605	1418274_at	406.4	396.7	411.6	446.8	451.5	443	1.10422	0.143032	0.00108824	predicted gene 10349 /// predicted pseudogene 9386 /// nuclear transport factor 2 /// nuclear transport factor 2, pseudogene 1	Gm10349 /// Gm9386 /// Nutf2 /// Nutf2-ps1
42526	1458231_at	7.6	6.5	9.4	0.5	0.4	0.9	-13.0556	-3.70659	0.00108865	predicted gene, 17776 /// predicted gene 6600	Gm17776 /// Gm6600
19203	1434897_a_at	5116.5	5123.1	4992.4	4186.5	4208.7	4451.2	-1.1857	-0.245741	0.00110676	solute carrier family 25 (mitochondrial carrier, adenine nucleotide translocator), member 4	Slc25a4
21464	1437158_at	334.6	334	346.9	391.8	382.3	380.1	1.13658	0.184703	0.00111757	Nipped-B homolog (Drosophila)	Nipbl
19477	1435171_at	53.5	54.1	58.4	30.3	25.1	34.2	-1.85268	-0.889613	0.00113079	uncharacterized LOC102642487	LOC102642487
25006	1440700_a_at	6	6.6	5.1	1.6	2.2	2.1	-3	-1.58496	0.00114934	rho/rac guanine nucleotide exchange factor (GEF) 18	Arhgef18
18892	1434586_a_at	510.7	517.9	495.4	380.9	381.5	417.8	-1.29131	-0.368832	0.00117657	phosphatidylserine synthase 2	Ptdss2
6698	1422392_at	3.1	0.6	1.3	7.8	8.5	9	5.06	2.33914	0.00118692	vomeronasal 1 receptor 15	Vmn1r15
23505	1439199_at	30	30.1	27.9	23.3	23.4	22.6	-1.26984	-0.344648	0.00120481
13885	1429579_at	224.5	232.2	244.9	314.9	349.6	347	1.4417	0.527776	0.00122237	guanylate cyclase 1, soluble, alpha 2	Gucy1a2
9449	1425143_a_at	1101.7	1056.4	1086.7	918.8	920.3	957.2	-1.16039	-0.21461	0.00122454	NADH dehydrogenase (ubiquinone) Fe-S protein 1	Ndufs1
32553	1448253_at	1656.1	1650.2	1828.7	1133.5	1092.1	1217.3	-1.49148	-0.57674	0.00123044	glutamate dehydrogenase 1	Glud1
39791	1455496_at	160.9	171.5	163.6	138.8	137.9	140.1	-1.19002	-0.250985	0.0012401	phosphoribosylformylglycinamidine synthase (FGAR amidotransferase)	Pfas
37432	1453137_at	74.5	77.4	68.2	51.3	51.5	50.9	-1.43201	-0.518042	0.00124317	F-box protein 30	Fbxo30
16328	1432022_at	32.3	28.6	29.5	20.3	17.9	17.3	-1.62883	-0.703835	0.00128429	Rho GTPase activating protein 31	Arhgap31
15318	1431012_a_at	307.7	311.3	301	263.6	246.5	244	-1.22	-0.286878	0.00128514	enoyl-Coenzyme A delta isomerase 2	Eci2
14311	1430005_a_at	27.1	20.1	27.9	5.3	4.9	5	-4.94079	-2.30474	0.00129296	basic leucine zipper transcription factor, ATF-like 2	Batf2
13112	1428806_at	251.4	264	222.5	353.2	358.3	342.8	1.42878	0.514788	0.00129366	casein kinase 1, gamma 1	Csnk1g1
33919	1449619_s_at	7.4	7.2	6.1	2.6	1.5	2.8	-3	-1.58496	0.00129391	Rho GTPase activating protein 9	Arhgap9
264	1415933_a_at	4457.7	4247.7	4278.9	3722.2	3768.3	3628	-1.16781	-0.223806	0.00129942	cytochrome c oxidase subunit Va	Cox5a
41677	1457382_at	5.3	5.4	3.1	13.4	12.1	14.9	2.92754	1.54969	0.0013022
12620	1428314_at	1909.6	1871.6	1913.7	2009.6	2008.3	2025.3	1.06116	0.0856422	0.00131023	PEST proteolytic signal containing nuclear protein	Pcnp
3800	1419469_at	281.8	258.8	248.6	187	180.4	179.8	-1.44225	-0.528323	0.00132516	guanine nucleotide binding protein (G protein), beta 4	Gnb4
28168	1443862_at	296.9	303	281.3	215.5	232.8	230.6	-1.29798	-0.37627	0.00133313
29866	1445560_at	5.7	5.8	6.5	3.3	3.1	3.8	-1.76471	-0.819428	0.00134883
22504	1438198_at	229.5	230.6	230	189.6	182.7	199.7	-1.20647	-0.27079	0.00135045	Bri3 binding protein	Bri3bp
12310	1428004_at	195.8	198.4	194.2	140.4	145.8	121.1	-1.44464	-0.530705	0.00135796	small nuclear ribonucleoprotein 25 (U11/U12)	Snrnp25
14598	1430292_a_at	350.4	329.2	325.9	259.6	273.3	259.4	-1.26909	-0.343794	0.00136149	small integral membrane protein 8	Smim8
6585	1422279_at	35.3	41.6	46.7	81.4	77.1	91.1	2.01942	1.01394	0.00136536	Friend virus susceptibility 1	Fv1
21803	1437497_a_at	3152	3120.7	3216	3434.8	3498.1	3422.8	1.09137	0.126143	0.00137672	heat shock protein 90, alpha (cytosolic), class A member 1	Hsp90aa1
20020	1435714_x_at	104.4	100.6	112.6	133.8	134.6	133.6	1.26574	0.339985	0.00137816	interleukin 17D	Il17d
24448	1440142_s_at	93.9	84.5	84.8	63.5	58.4	58.8	-1.45656	-0.542563	0.00140578	glial fibrillary acidic protein	Gfap
14271	1429965_at	927.2	945.3	959.1	855	860.3	835.5	-1.11008	-0.150668	0.00142258	LON peptidase N-terminal domain and ring finger 2	Lonrf2
20486	1436180_at	933.6	955.4	982.7	1080.2	1083.6	1110.3	1.14013	0.189193	0.00142591	DnaJ (Hsp40) homolog, subfamily C, member 5	Dnajc5
34551	1450256_at	2.9	2.8	3.2	5.8	4.9	5.8	1.85393	0.890589	0.00143036	cerberus 1 homolog (Xenopus laevis)	Cer1
36116	1451821_a_at	25.1	16.6	22.6	1.9	1.8	1	-13.6809	-3.77409	0.00143841	nuclear antigen Sp100	Sp100
1455	1417124_at	1483.9	1619.2	1472.1	991.9	1023.1	1122.3	-1.45832	-0.544311	0.0014549	destrin	Dstn
44183	1459888_at	57.4	60.5	55.4	45.7	42.6	44.4	-1.30595	-0.385103	0.00145618	predicted gene, 20748	Gm20748
21811	1437505_at	101.5	104	96	80.3	75.3	79.6	-1.28189	-0.35827	0.00145716
19714	1435408_at	23.7	20.1	26.2	8.1	5.7	3.2	-4.11765	-2.04182	0.00146052	NEDD4 binding protein 2-like 2	N4bp2l2
4842	1420536_at	7.4	1.9	5	25.1	21.6	28.8	5.27972	2.40046	0.00146374	crystallin, beta B2	Crybb2
7088	1422782_s_at	70.7	70.1	68.1	53.2	45.6	44.7	-1.45575	-0.541762	0.00148393	toll-like receptor 3	Tlr3
22562	1438256_at	128.4	125.4	122.6	108.1	106.6	101.6	-1.19001	-0.250973	0.00148659	eukaryotic translation initiation factor 5A2	Eif5a2
33669	1449369_at	26.8	23.6	24.8	14.9	15.3	17.3	-1.58316	-0.662805	0.00149911	transmembrane protease, serine 2	Tmprss2
396	1416065_a_at	480.1	441.9	453.8	587.1	595.4	637.5	1.32287	0.403668	0.00153852	ankyrin repeat domain 10	Ankrd10
8795	1424489_a_at	154.4	158.3	157.4	141.4	138.5	144.1	-1.10873	-0.148903	0.00154649	tRNA isopentenyltransferase 1	Trit1
38953	1454658_at	159.4	139.2	152.9	106.3	100.5	100.4	-1.46973	-0.555548	0.00154736	ilvB (bacterial acetolactate synthase)-like	Ilvbl
33287	1448987_at	330.2	366	351.3	244.4	201.2	227.4	-1.55646	-0.638272	0.00156365	acyl-Coenzyme A dehydrogenase, long-chain	Acadl
15331	1431025_at	41.8	43.4	47.3	31.1	28.4	30.8	-1.46733	-0.553194	0.00158353	fuzzy homolog (Drosophila)	Fuz
25168	1440862_at	276.6	273.5	300.8	201.1	217	209.5	-1.3558	-0.439144	0.00159703
21517	1437211_x_at	1337.6	1247.5	1300.2	1072.6	1080.3	1102.3	-1.19357	-0.25528	0.00160209	ELOVL family member 5, elongation of long chain fatty acids (yeast)	Elovl5
9658	1425352_at	35.3	35.7	38.3	26.1	24.9	28.1	-1.3818	-0.466544	0.00161018	REST corepressor 3	Rcor3
12869	1428563_at	88.8	92.6	95.7	128.3	117.5	119.5	1.3183	0.398675	0.00161253	DEAD (Asp-Glu-Ala-Asp) box polypeptide 10	Ddx10
8120	1423814_at	36.8	38.3	28.3	76.8	71.2	64.2	2.05222	1.03719	0.00163612	DEAD (Asp-Glu-Ala-Asp) box polypeptide 41	Ddx41
34858	1450563_at	16	14.6	18.9	5.7	2	2.2	-5	-2.32193	0.00163871	microsomal glutathione S-transferase 3	Mgst3
8670	1424364_a_at	1237.1	1228.3	1154.1	1008	961.3	965.3	-1.23339	-0.302627	0.00165534	ubiquinol-cytochrome c reductase, complex III subunit X	Uqcr10
13128	1428822_a_at	276.6	273.7	288.1	215.7	232	232.2	-1.23312	-0.302316	0.00166509	sorting nexing 24	Snx24
26300	1441994_at	159.7	154.6	167.9	109.2	122.1	121.6	-1.36639	-0.450372	0.00167011	protocadherin beta 16	Pcdhb16
31462	1447156_at	135.1	131.5	129.3	106.4	113.6	105.1	-1.21778	-0.284253	0.00167286
12705	1428399_a_at	74.5	79	74.3	49.5	56.3	46.1	-1.49967	-0.584646	0.00168139	armadillo repeat containing 9	Armc9
19181	1434875_a_at	1309.5	1242.7	1275.8	1106.2	1045	1084.8	-1.18294	-0.242379	0.00169601	high mobility group nucleosomal binding domain 3	Hmgn3
16638	1432332_a_at	459	536.9	517.8	296.9	311	331.8	-1.61083	-0.687807	0.00169781	nudix (nucleoside diphosphate linked moiety X)-type motif 19	Nudt19
16368	1432062_at	8.1	2.5	1.8	23.7	22.1	19.4	5.25806	2.39453	0.00171534	MAM domain containing glycosylphosphatidylinositol anchor 1	Mdga1
19775	1435469_at	160.4	162.5	153.4	106.6	76.6	85.7	-1.77129	-0.824801	0.00174646	quiescin Q6 sulfhydryl oxidase 2	Qsox2
11716	1427410_at	124.1	122.6	109.3	193.6	173.1	173.4	1.51713	0.601349	0.00174823	deleted in lymphocytic leukemia, 2	Dleu2
22477	1438171_x_at	1061.7	1040	1150.2	1483.7	1542.9	1402.7	1.36207	0.445796	0.00174827	methyltransferase like 9	Mettl9
16648	1432342_at	5.8	2.8	10.2	25.8	23.3	22.5	3.80851	1.92923	0.00174855	nicotinamide nucleotide adenylyltransferase 3	Nmnat3
36234	1451939_a_at	20.9	22.3	20.5	27.2	29.7	27.7	1.3281	0.409364	0.00175913	sushi-repeat-containing protein	Srpx
30777	1446471_at	2.7	4.3	1.3	10.9	12.6	14.4	4.56627	2.19101	0.00176829
6988	1422682_s_at	20.8	15.9	17.2	5.7	6.2	7.5	-2.77835	-1.47423	0.0018073	predicted gene 10334 /// predicted gene 5771 /// protease, serine 1 (trypsin 1) /// protease, serine 3	Gm10334 /// Gm5771 /// Prss1 /// Prss3
4187	1419864_x_at	4.3	4	4.2	14.9	15.4	20.3	4.048	2.01721	0.00181326	transportin 1	Tnpo1
37645	1453350_at	36.7	37.1	45.6	60.9	64.5	62.1	1.57035	0.651088	0.00182659	upregulator of cell proliferation	Urgcp
40980	1456685_at	163.8	176.4	191.6	364.4	297.1	344.4	1.8915	0.919531	0.00182807	neuron specific gene family member 2	Nsg2
16029	1431723_at	23.8	22.1	23.4	4.2	6.9	11.3	-3.09375	-1.62936	0.00184035	RIKEN cDNA 1600022D10 gene	1600022D10Rik
22217	1437911_at	101.8	103.5	101.2	63.7	71.3	52.8	-1.63206	-0.70669	0.00186283	zinc finger protein 944	Zfp944
39331	1455036_s_at	3837.3	3804.8	3857.8	3224.3	3161.2	3414.7	-1.17344	-0.230738	0.00188399	NADH dehydrogenase [ubiquinone] 1 subunit C2-like /// NADH dehydrogenase (ubiquinone) 1, subcomplex unknown, 2	LOC102641347 /// Ndufc2
43405	1459110_at	23.2	17.5	14.5	37.1	37.4	40.1	2.07609	1.05387	0.00190281	myosin IXb	Myo9b
27453	1443147_at	21.3	21.5	19	7.2	9.7	3.8	-2.98551	-1.57798	0.00191727
4233	1419914_s_at	1201.8	1206.4	1201.7	1419.4	1425.7	1343.1	1.1602	0.214371	0.00192212	nuclear undecaprenyl pyrophosphate synthase 1 homolog (S. cerevisiae)	Nus1
25821	1441515_at	52	49.2	50	36.6	36.8	41.1	-1.32052	-0.401111	0.00192223	family with sequence similarity 228, member B	Fam228b
37651	1453356_at	134.4	133.8	141.4	91.3	90.1	105.9	-1.42569	-0.511658	0.00193568	cleavage and polyadenylation specific factor 7	Cpsf7
37224	1452929_at	634.9	609.7	588.2	717.7	706	724.6	1.17214	0.229146	0.00194168	CAP-GLY domain containing linker protein 1	Clip1
11000	1426694_at	200.5	209.4	207.2	227	227.3	232.5	1.11295	0.154386	0.0019503	RIKEN cDNA 9030624J02 gene	9030624J02Rik
24554	1440248_at	62.5	54	71.4	98.4	107	105.4	1.65407	0.726021	0.00195314	cancer susceptibility candidate 4	Casc4
36226	1451931_x_at	93.4	112.2	93.9	145.9	143.1	149.2	1.46311	0.549033	0.00198377	histocompatibility 2, K1, K region	H2-K1
18378	1434072_at	81.4	91.7	81	41.4	54.5	46.8	-1.78066	-0.832411	0.00198781	mitochondrial elongation factor 2	Mief2
44628	1460336_at	231.6	204	211.7	76.7	122.7	78.5	-2.32926	-1.21987	0.00199008	peroxisome proliferative activated receptor, gamma, coactivator 1 alpha	Ppargc1a
35185	1450890_a_at	923	931.7	935.3	994.4	999.4	1026.8	1.08265	0.11457	0.00199734	abl-interactor 1	Abi1
22818	1438512_at	23.6	21.7	23.4	12.3	9.9	14.6	-1.86685	-0.900604	0.00201201	cDNA sequence BC048679	BC048679
1971	1417640_at	1.2	0.9	0.9	14.1	12.4	19	15.1667	3.92283	0.00202321	CD79B antigen	Cd79b
4409	1420090_at	34.6	38.7	33.6	17.7	19.9	12.7	-2.12525	-1.08763	0.00202968	v-raf-leukemia viral oncogene 1	Raf1
34962	1450667_a_at	1984.4	1933.6	1825.8	1532.1	1515.4	1588.6	-1.23893	-0.309094	0.00203896	citrate synthase	Cs
13323	1429017_at	154.8	148.8	152.5	130.6	127.1	119.6	-1.20885	-0.273638	0.0020489	Smith-Magenis syndrome chromosome region, candidate 8 homolog (human)	Smcr8
19469	1435163_at	214.4	207.6	229.9	365	353.5	310.9	1.57908	0.659081	0.00208111	zinc finger protein 871	Zfp871
31683	1447377_at	27.5	22	24.4	36.9	36.1	38.8	1.51286	0.597274	0.00209026	predicted gene 11236 /// predicted gene 11237 /// predicted gene 428 /// uncharacterized LOC100502896 /// uncharacterized LOC100862015 /// uncharacterized LOC101055863	Gm11236 /// Gm11237 /// Gm428 /// LOC100502896 /// LOC100862015 /// LOC101055863
1287	1416956_at	671	637.1	559.6	388	389.5	390.2	-1.59947	-0.677593	0.00210519	potassium voltage-gated channel, shaker-related subfamily, beta member 2	Kcnab2
10920	1426614_at	444.4	463.8	390.2	613.5	625.1	674.9	1.47374	0.559479	0.00210583	zinc finger, MYND-type containing 8	Zmynd8
40871	1456576_x_at	490.9	497.4	506.5	535.2	535	545.6	1.08095	0.112296	0.00213328	CCR4-NOT transcription complex, subunit 2	Cnot2
11708	1427402_at	54.6	44.1	39.1	12.5	13.3	14.6	-3.41089	-1.77015	0.00213963	polymerase (RNA) II (DNA directed) polypeptide F	Polr2f
5328	1421022_x_at	355.7	348.4	366.1	260.7	255.2	212	-1.47026	-0.556068	0.00215832	acylphosphatase 1, erythrocyte (common) type	Acyp1
1558	1417227_at	312.8	313.6	292	253	236.4	247.7	-1.24596	-0.317262	0.00216027	methylcrotonoyl-Coenzyme A carboxylase 1 (alpha)	Mccc1
23064	1438758_at	101.3	90.8	80.9	207.3	208.3	262.7	2.48462	1.31302	0.00216105	acireductone dioxygenase 1	Adi1
17824	1433518_at	75.7	78.5	70.7	48.8	51.2	40.3	-1.60299	-0.680769	0.00216928	leucine carboxyl methyltransferase 2	Lcmt2
23786	1439480_at	18.8	18	19.1	3.1	8.3	1.7	-4.26718	-2.09328	0.00217737	predicted gene 10857	Gm10857
32503	1448203_at	2499.8	2584.2	2461.9	2241.4	2190.2	2141.1	-1.14807	-0.199207	0.00218698	ATP synthase, H+ transporting, mitochondrial F0 complex, subunit G	Atp5l
34778	1450483_at	36.4	31.8	40.3	14.7	11.8	5.6	-3.38006	-1.75705	0.00219276	gap junction protein, gamma 2	Gjc2
38689	1454394_at	9.2	11.4	13.2	3.2	1.2	1	-6.25926	-2.64599	0.00219702	RIKEN cDNA 4932432N04 gene	4932432N04Rik
27294	1442988_at	16	11.9	15.2	5.6	5.1	5.8	-2.61212	-1.38522	0.00222638	uncharacterized LOC102634034	LOC102634034
30354	1446048_at	219.6	234.7	230	177.4	191.5	175.9	-1.25606	-0.328902	0.00223567
8749	1424443_at	102.8	99.9	98.7	85.8	89.2	83.5	-1.16596	-0.221515	0.00224055	transmembrane 6 superfamily member 1	Tm6sf1
2652	1418321_at	176.9	164.3	160.3	129.5	121.4	115.1	-1.37022	-0.454406	0.00226712	enoyl-Coenzyme A delta isomerase 1	Eci1
42212	1457917_at	2.6	1.6	6.4	15.7	15	18.8	4.66981	2.22336	0.00227637	lymphocyte protein tyrosine kinase	Lck
1574	1417243_at	364.4	351.2	357.7	385	391.9	394.2	1.09112	0.125811	0.00228255	family with sequence similarity 192, member A	Fam192a
24192	1439886_at	223.8	225.5	219.3	189.8	183.8	198.5	-1.16868	-0.224876	0.00229328
41248	1456953_at	111.6	114.1	112.1	86.8	96.8	92.2	-1.2248	-0.292547	0.00229585	collagen, type XIX, alpha 1	Col19a1
4393	1420074_at	49.6	55.1	50.2	21	23.4	32.1	-2.02484	-1.01781	0.00233152	DNA segment, Chr 8, ERATO Doi 738, expressed	D8Ertd738e
10828	1426522_at	716.1	712	688.8	471.6	561.9	491.3	-1.38831	-0.473333	0.00234282	hydroxyacyl-Coenzyme A dehydrogenase/3-ketoacyl-Coenzyme A thiolase/enoyl-Coenzyme A hydratase (trifunctional protein), beta subunit	Hadhb
39131	1454836_at	199.3	207.9	199.6	274.3	290.3	319.3	1.45666	0.542662	0.00236656	transmembrane protein 18	Tmem18
17153	1432847_at	11.3	15	9.5	24.7	30.3	29.1	2.34916	1.23215	0.00237296	RIKEN cDNA 2810457G06 gene	2810457G06Rik
10787	1426481_at	605.9	626.5	618.9	676.4	660.5	673.5	1.08594	0.118944	0.00238722	kelch-like 22	Klhl22
16680	1432374_a_at	54.2	55.4	61.2	80.1	78	87.7	1.43911	0.525177	0.00238805	ethanolaminephosphotransferase 1 (CDP-ethanolamine-specific)	Ept1
5962	1421656_at	22.7	22.9	19.5	38.5	37.3	32.6	1.66513	0.735635	0.00239203	sprouty homolog 2 (Drosophila)	Spry2
36811	1452516_at	2.4	4	5.5	30.3	19.9	26.6	6.45378	2.69014	0.00241771	sperm motility kinase 3A /// sperm motility kinase 3B /// sperm motility kinase 3C	Smok3a /// Smok3b /// Smok3c
1763	1417432_a_at	593.2	360.4	338.4	997.2	1070.8	980.9	2.35983	1.23868	0.00243841	guanine nucleotide binding protein (G protein), beta 1	Gnb1
8934	1424628_a_at	2039.5	2003.9	2034.1	1815	1709.4	1678.1	-1.16819	-0.224273	0.00243851	NADH dehydrogenase (ubiquinone) flavoprotein 3	Ndufv3
27521	1443215_at	35.3	29.5	32	20.9	17.9	19.5	-1.66038	-0.731511	0.00245665	regulating synaptic membrane exocytosis 2	Rims2
37275	1452980_at	315.8	334.1	322.9	251.1	219.3	253.4	-1.34402	-0.426552	0.00245746	RIKEN cDNA 2810468N07 gene	2810468N07Rik
18201	1433895_at	290	308.1	306.6	416.3	375.5	387	1.30297	0.381808	0.00245893	transmembrane protein 127	Tmem127
42692	1458397_at	23	21.9	24	19	18.7	18.7	-1.22163	-0.288809	0.00247146	predicted gene 6297	Gm6297
44410	1460117_at	101.4	104.5	82.7	49	50.3	50.5	-1.92657	-0.946034	0.00247195
42894	1458599_at	2.6	1.8	6.3	15.1	13.9	12.8	3.90654	1.96589	0.00251844
13641	1429335_at	183.7	169.9	154.4	229.1	251.4	244.9	1.42795	0.513948	0.00251984	small nuclear RNA activating complex, polypeptide 1	Snapc1
4255	1419936_at	9.7	7.7	8.3	1.4	3.1	3.5	-3.2125	-1.6837	0.00252093
32286	1447980_s_at	257.5	265.9	258.3	320.5	297.2	311.6	1.18882	0.249529	0.0025218	small G protein signaling modulator 1	Sgsm1
43231	1458936_at	9.2	8.2	6.5	17.6	17	21.4	2.3431	1.22842	0.00252276
37120	1452825_at	667.8	744.7	625.8	926.6	908.5	914.2	1.34882	0.431698	0.00254072	transmembrane protein 59-like	Tmem59l
24418	1440112_at	378.6	386.1	383.4	307.5	275	314.8	-1.27951	-0.355586	0.00254389	leucine rich repeat transmembrane neuronal 3	Lrrtm3
13219	1428913_at	310.2	326.7	332.2	244.8	262.7	267.8	-1.24997	-0.321891	0.00254923	DNL-type zinc finger	Dnlz
29184	1444878_at	97.3	106.5	129.8	43.3	48.1	45.1	-2.44396	-1.28922	0.00254939
22057	1437751_at	194.6	156.4	198.8	81.5	87.3	59.3	-2.41035	-1.26924	0.00255521	peroxisome proliferative activated receptor, gamma, coactivator 1 alpha	Ppargc1a
16086	1431780_at	8.2	7.7	2.1	22.1	22.8	19	3.55	1.82782	0.00255616	cadherin-related family member 4	Cdhr4
20664	1436358_at	586.8	585.6	562.7	482.2	503	461.5	-1.19935	-0.262253	0.00256171	ATP synthase mitochondrial F1 complex assembly factor 1	Atpaf1
29893	1445587_at	0.9	0.8	1.4	2.6	3.1	3.4	2.93548	1.5536	0.00257026
18891	1434585_at	84.4	75.8	73.7	106.7	115.3	121.8	1.46986	0.555678	0.00257276	predicted gene 2808 /// tubby like protein 4	Gm2808 /// Tulp4
28914	1444608_at	12.6	7.8	10.4	1.2	0.8	0.8	-11	-3.45943	0.00258617
40267	1455972_x_at	511.7	547.6	511.4	414.7	421.3	379.5	-1.29223	-0.369858	0.00258887	hydroxyacyl-Coenzyme A dehydrogenase	Hadh
36824	1452529_a_at	39.8	35.7	36.4	50.4	46.6	50	1.31367	0.393606	0.0025934	cAMP responsive element binding protein 1	Creb1
24764	1440458_at	12.1	10.3	13	2.7	3.3	5.6	-3.05172	-1.60962	0.0026132	cytidine monophospho-N-acetylneuraminic acid hydroxylase	Cmah
25751	1441445_at	159.9	134.2	152.8	89.5	75.6	93.7	-1.72682	-0.788114	0.00264012	period circadian clock 3	Per3
44516	1460223_a_at	1231.6	1246.9	1194.7	1448.4	1371.7	1397.2	1.14813	0.199282	0.00268697	dematin actin binding protein	Dmtn
6883	1422577_at	485.2	487	476.9	404.2	403.2	433.7	-1.16759	-0.223538	0.0027032	citrate synthase	Cs
28894	1444588_at	10.3	6.3	2.5	23.6	23.7	29.1	4	2	0.00272905
37357	1453062_at	198.4	188	190.4	154.2	163.4	147.1	-1.24123	-0.311772	0.00274555	RIKEN cDNA A930026I22 gene	A930026I22Rik
6044	1421738_at	257.9	356.2	336.6	554.8	579	515.2	1.73451	0.794529	0.00274802	gamma-aminobutyric acid (GABA) A receptor, subunit alpha 2	Gabra2
2891	1418560_at	1595	1623	1501.1	1157	1267	1267.3	-1.27844	-0.354383	0.00275427	pyruvate dehydrogenase E1 alpha 1	Pdha1
21539	1437233_x_at	57.1	71.9	63.9	4.3	25.7	8.4	-5.02344	-2.32867	0.00276489	PITH (C-terminal proteasome-interacting domain of thioredoxin-like) domain containing 1	Pithd1
12422	1428116_a_at	721.6	729.6	777.1	566.6	537.4	605.7	-1.30333	-0.3822	0.00277131	dynein light chain Tctex-type 1A /// dynein light chain Tctex-type 1B /// dynein light chain Tctex-type 1C /// dynein light chain Tctex-type 1F	Dynlt1a /// Dynlt1b /// Dynlt1c /// Dynlt1f
21206	1436900_x_at	260.9	265.6	262	246	238.9	246.8	-1.07763	-0.107858	0.00278545	leptin receptor overlapping transcript	Leprot
22067	1437761_at	1027.3	1001	1017.4	904	925.5	944.1	-1.0981	-0.135014	0.00284442	LUC7-like 2 (S. cerevisiae)	Luc7l2
7067	1422761_at	1.2	4	5.4	18.3	18.7	13.6	4.77358	2.25507	0.0028872	transducin (beta)-like 1X-linked receptor 1	Tbl1xr1
1030	1416699_at	703.9	699.8	710	652.2	662	634.9	-1.08445	-0.116963	0.00291213	RIKEN cDNA 1110008F13 gene	1110008F13Rik
28837	1444531_at	217.7	210.9	250	142.5	146.9	150.8	-1.54157	-0.624402	0.00295289
14793	1430487_at	2.5	1.2	3	12.8	16.4	20.2	7.37313	2.88228	0.00295432	AU RNA binding protein/enoyl-coenzyme A hydratase	Auh
32196	1447890_at	13.3	13.2	18.2	3.2	3.8	0.6	-5.88158	-2.5562	0.00299151	reticulocalbin 1	Rcn1
1435	1417104_at	54.8	45.4	51.1	29.6	32.1	25.7	-1.73112	-0.791707	0.00299262	epithelial membrane protein 3	Emp3
32747	1448447_at	1138.7	1099.3	1120.6	1049.1	1040.2	1044.6	-1.0717	-0.0999008	0.00303146	vacuolar protein sorting 28 (yeast)	Vps28
946	1416615_at	461.1	430.1	440.7	388.3	380.3	382.9	-1.15667	-0.209971	0.00306227	caseinolytic mitochondrial matrix peptidase proteolytic subunit	Clpp
35444	1451149_at	331.7	321.8	325.7	276.3	243.7	266.2	-1.24548	-0.316707	0.00306544	phosphoglucomutase 2	Pgm2
40039	1455744_at	338.2	359.2	338.1	284.9	252.6	272.7	-1.27808	-0.353978	0.00306973
19991	1435685_x_at	167.7	154.6	146.9	74.9	96.5	101.8	-1.71742	-0.780246	0.00307915	ATP-binding cassette, sub-family C (CFTR/MRP), member 5	Abcc5
37834	1453539_at	128.2	121.3	132.3	95.9	100.5	105.2	-1.26592	-0.340181	0.00308074	alkB, alkylation repair homolog 8 (E. coli)	Alkbh8
37928	1453633_a_at	33.6	31.2	30.5	39.1	38.4	37.6	1.20776	0.27234	0.00308984	ring finger protein 41	Rnf41
30085	1445779_at	118.4	81.9	104.3	31.2	26.3	10.2	-4.49926	-2.16969	0.00309562
10143	1425837_a_at	694.7	665.3	582.1	856.3	882.6	865.2	1.34087	0.423167	0.00309822	CCR4 carbon catabolite repression 4-like (S. cerevisiae)	Ccrn4l
32508	1448208_at	263.6	261.7	263.2	270.8	274.9	270.9	1.03564	0.0505188	0.00310293	SMAD family member 1	Smad1
10387	1426081_a_at	137.4	111.1	95	199.8	218.1	195.7	1.78632	0.836988	0.00312471	deiodinase, iodothyronine, type II	Dio2
8476	1424170_at	249.2	240.6	211.2	337.9	308.9	334.1	1.39929	0.484692	0.00313151	PHD finger protein 5A	Phf5a
39355	1455060_at	85.6	76.4	87.7	59.6	54.5	49.6	-1.52535	-0.609141	0.00314977	GTPase activating protein (SH3 domain) binding protein 1	G3bp1
33369	1449069_at	539.1	532.5	541.7	597	577.2	576.7	1.08529	0.118082	0.00315247	zinc finger protein 148	Zfp148
40181	1455886_at	202.2	193.8	203.7	244.2	227.8	242.2	1.19093	0.252087	0.00315888	Casitas B-lineage lymphoma	Cbl
30776	1446470_at	33.5	31.3	30.5	23.5	19	18.7	-1.55719	-0.638945	0.00316974	predicted gene 9799	Gm9799
38594	1454299_at	74.3	75	72	52.5	53.6	61.1	-1.32356	-0.404429	0.00319253	RIKEN cDNA 4833422B07 gene	4833422B07Rik
39787	1455492_at	31.5	37.5	28.5	54.4	52.1	60.6	1.71385	0.777238	0.00319264	RIKEN cDNA B330016D10 gene	B330016D10Rik
13095	1428789_at	311.6	332.6	305.9	382.4	367.1	376.1	1.18472	0.244543	0.00320261	Ral GEF with PH domain and SH3 binding motif 2	Ralgps2
40648	1456353_at	43.1	44.6	41.4	25.3	32.5	27.7	-1.50994	-0.594493	0.00325888
8554	1424248_at	7506	7629.9	7521.7	8108.5	8061.6	8354.8	1.08241	0.114252	0.00325926	cyclic AMP-regulated phosphoprotein, 21	Arpp21
19811	1435505_at	440.7	461.4	508.1	595.6	592.1	603.4	1.2701	0.344946	0.00327902	dystrophia myotonica-containing WD repeat motif	Dmwd
24604	1440298_at	2	1.9	1.7	2.7	2.9	3.2	1.57143	0.652077	0.0032911	triggering receptor expressed on myeloid cells-like 2	Treml2
14817	1430511_at	59.8	62.4	62.7	68	67.9	67.1	1.09789	0.134735	0.00332167	unc-13 homolog C (C. elegans)	Unc13c
8414	1424108_at	900.7	936.6	733.3	477	461.3	437	-1.86912	-0.902359	0.00333527	glyoxalase 1	Glo1
37343	1453048_at	97.5	97.5	93.5	80	85.5	79.7	-1.17659	-0.234612	0.00334043	NHL repeat containing 2	Nhlrc2
13528	1429222_at	49.5	51	53.8	62.4	62.1	66.8	1.23979	0.310099	0.00334374	pseudouridine synthase 3	Pus3
1017	1416686_at	25.1	31.2	28.1	16	10.6	10.5	-2.27493	-1.18582	0.0033786	procollagen lysine, 2-oxoglutarate 5-dioxygenase 2	Plod2
927	1416596_at	14.7	16.2	18.3	8.3	5.6	8.7	-2.17699	-1.12234	0.00341878	solute carrier family 44, member 4	Slc44a4
33314	1449014_at	232.2	197.6	223.3	70.8	90.1	127.4	-2.26535	-1.17973	0.00342368	lactamase, beta	Lactb
13337	1429031_at	188.9	186	188	174.4	177.9	171.2	-1.07526	-0.104689	0.0034286	RIKEN cDNA 4833408D11 gene	4833408D11Rik
35391	1451096_at	1384.4	1303.4	1247.1	1016.5	1033.7	1075.2	-1.25901	-0.332286	0.00343278	NADH dehydrogenase (ubiquinone) Fe-S protein 2	Ndufs2
44850	1460558_at	415.2	429	416.1	359.8	363.3	382.4	-1.14003	-0.189068	0.00343519	coiled-coil domain containing 32	Ccdc32
10191	1425885_a_at	230.6	193.6	180.3	95.9	95.2	113.1	-1.98718	-0.990722	0.00344276	potassium voltage-gated channel, shaker-related subfamily, beta member 2	Kcnab2
3768	1419437_at	11.2	14.5	16.3	4.7	1.8	3.6	-4.15842	-2.05603	0.00344832	single-minded homolog 2 (Drosophila)	Sim2
39532	1455237_at	193	204	170.5	124.4	121.9	131.1	-1.50371	-0.588526	0.00345883	ubiquitin specific peptidase 36	Usp36
31653	1447347_at	1.4	1	1.2	14.8	19.8	11.9	12.9167	3.69116	0.003462
38661	1454366_at	26.9	25.4	28.9	14.8	6.9	12.3	-2.38824	-1.25594	0.00346409	RIKEN cDNA 4833419A21 gene	4833419A21Rik
38010	1453715_at	35.1	26.7	32.8	54.3	49.4	48.4	1.60782	0.685108	0.00347349	synaptic vesicle glycoprotein 2c	Sv2c
31425	1447119_at	13.6	17.6	16.2	4.3	7.7	3.7	-3.01911	-1.59412	0.00348512
1890	1417559_at	522.5	523.7	487	678.7	801.9	750.3	1.45506	0.54108	0.00350433	sideroflexin 1	Sfxn1
37058	1452763_at	597.8	575.8	570.2	355.9	449.7	411.8	-1.4324	-0.518431	0.00353895	non imprinted in Prader-Willi/Angelman syndrome 1 homolog (human)	Nipa1
38846	1454551_at	39.3	37.6	33.8	48.1	53.5	53.2	1.39837	0.48375	0.00354602	RIKEN cDNA 9530034D02 gene	9530034D02Rik
40272	1455977_x_at	9.9	4.3	4.8	18.4	19.1	16.8	2.85789	1.51495	0.00355273	kallikrein 1	Klk1
21553	1437247_at	152.3	143.5	151.8	216	229	194.6	1.42895	0.51496	0.00357136	fos-like antigen 2	Fosl2
34720	1450425_a_at	142.3	125.1	149.1	182.5	196	188	1.36014	0.443759	0.00357237	RIKEN cDNA 2700062C07 gene /// predicted gene 9182	2700062C07Rik /// Gm9182
32783	1448483_a_at	1714.3	1674.3	1706.8	1548.6	1577.8	1501.5	-1.10102	-0.138838	0.00357325	NADH dehydrogenase (ubiquinone) 1 beta subcomplex, 2	Ndufb2
17577	1433271_at	23.4	25.2	22.6	9.9	11.9	4.1	-2.74903	-1.45893	0.0035826	RIKEN cDNA 9530004M16 gene	9530004M16Rik
23269	1438963_s_at	137.7	125.5	128.5	161.7	156.3	168.9	1.24304	0.313876	0.00358687	TCF3 (E2A) fusion partner	Tfpt
2518	1418187_at	137.6	121	128.6	164.8	159	158.7	1.24613	0.31745	0.0036143	receptor (calcitonin) activity modifying protein 2	Ramp2
33245	1448945_at	406.3	380.6	346.7	263.1	255.5	221.8	-1.53106	-0.614535	0.00361456	plasma membrane proteolipid	Pllp
39786	1455491_at	551.1	539.7	523.8	613.2	622.7	593.4	1.13297	0.180115	0.00363025	heterogeneous nuclear ribonucleoprotein H3	Hnrnph3
30953	1446647_at	2	1.9	2.1	1.2	0.6	0.8	-2.30769	-1.20645	0.00363955
8565	1424259_at	80.7	82.6	77.3	42	58.4	47.4	-1.62788	-0.70299	0.00364679	lipase maturation factor 1	Lmf1
1681	1417350_at	97.4	90.9	90.4	109.1	113	107.5	1.18263	0.242003	0.00366687	biogenesis of lysosomal organelles complex-1, subunit 6, pallidin	Bloc1s6
7872	1423566_a_at	1694.4	1701	1603.4	2047.4	2174.8	1977.7	1.24028	0.310663	0.00367542	heat shock 105kDa/110kDa protein 1	Hsph1
10994	1426688_at	2237.6	2195.3	2324.4	1905.4	1972.1	1820.4	-1.18593	-0.246017	0.00369339	succinate dehydrogenase complex, subunit A, flavoprotein (Fp)	Sdha
4235	1419916_at	26.3	33.5	28.5	49.2	44.3	44.1	1.55832	0.639995	0.00371091	ring finger protein 20	Rnf20
28187	1443881_at	129.4	125.3	134.1	90.5	71.5	93.4	-1.52232	-0.60627	0.00371646	protein O-fucosyltransferase 1	Pofut1
5984	1421678_at	8	4.9	4	17.3	23.8	18.4	3.52071	1.81587	0.00375775	inositol 1,4,5-triphosphate receptor 2	Itpr2
17409	1433103_at	2.5	2.1	2.1	6.5	9.4	9.8	3.83582	1.93954	0.00378528	hydrolethalus syndrome 1	Hyls1
5070	1420764_at	401.3	392.5	445.5	526.7	506.7	527.6	1.25958	0.332945	0.00379411	scrapie responsive gene 1	Scrg1
40911	1456616_a_at	2032.1	2048.6	2010.4	1937.4	1893	1877	-1.06723	-0.0938691	0.00379482	basigin	Bsg
6146	1421840_at	612.2	589.1	580.7	530.5	497.6	502.2	-1.16448	-0.219683	0.00384476	ATP-binding cassette, sub-family A (ABC1), member 1	Abca1
22783	1438477_a_at	236.6	257.5	241.4	207.9	200	195	-1.21994	-0.286807	0.00385388	methylmalonyl CoA epimerase	Mcee
39943	1455648_at	170.3	162.8	173.8	143.2	143.8	149.9	-1.16022	-0.214398	0.00387569	RIKEN cDNA 2210404O09 gene	2210404O09Rik
11309	1427003_at	506.3	503.9	498.2	444.7	466.2	437.8	-1.11841	-0.16145	0.00389956	protein phosphatase 2, regulatory subunit B', gamma	Ppp2r5c
1729	1417398_at	58.3	53.1	53.7	42.9	42.1	37.4	-1.34886	-0.431737	0.00389984	related RAS viral (r-ras) oncogene homolog 2	Rras2
31479	1447173_at	16.8	16.5	10.1	0.7	0.6	2	-13.1515	-3.71716	0.00390376	leucine rich repeat containing 31	Lrrc31
8953	1424647_at	42.3	52.6	44	24.9	27.4	27.4	-1.74279	-0.801395	0.00390954	gamma-aminobutyric acid (GABA) A receptor, pi	Gabrp
17904	1433598_at	337.9	347.7	358.5	292.9	285.5	307.6	-1.17844	-0.236881	0.00392184	arginine and glutamate rich 1	Arglu1
43350	1459055_at	7.2	2.4	4	14.7	12.9	16	3.20588	1.68072	0.00393677	forkhead box J3	Foxj3
40010	1455715_at	291.5	353	313.7	175.1	189.1	213.7	-1.65807	-0.729507	0.0039499	predicted gene 1976	Gm1976
3836	1419505_a_at	140.6	123.9	141.6	176.8	181.4	169.1	1.29845	0.376789	0.00395992	geranylgeranyl diphosphate synthase 1	Ggps1
18586	1434280_at	92.9	87	94.7	153.1	183	145.8	1.75492	0.811402	0.00400574	Mus musculus 8 days embryo whole body cDNA, RIKEN full-length enriched library, clone:5730463B09 product:unclassifiable, full insert sequence.	AK134344
17822	1433516_a_at	2332.9	2277.2	2306.5	2157.6	2063.2	2061.7	-1.10093	-0.138724	0.00402062	myeloma overexpressed 2	Myeov2
20376	1436070_at	293.8	267.3	241.9	152.3	166.2	180.5	-1.60922	-0.68636	0.00402176	glyoxalase 1	Glo1
25322	1441016_at	11.1	10.2	12.3	22.4	27.6	21	2.1131	1.07936	0.0040219
7740	1423434_at	2.4	4.1	3.8	8.7	11.7	12.5	3.19417	1.67544	0.0040455	TEA domain family member 1	Tead1
15528	1431222_at	40.1	37.1	34.5	47.3	51.2	48.5	1.31603	0.396187	0.00407277	T cell lymphoma invasion and metastasis 2	Tiam2
41980	1457685_at	0.8	1	5.7	13.6	16.9	12.9	5.78667	2.53273	0.00407519	zinc finger protein 81	Zfp81
25010	1440704_at	13.9	19.1	21.1	4.6	3.4	5.9	-3.89209	-1.96054	0.0040811	relaxin/insulin-like family peptide receptor 2	Rxfp2
5182	1420876_a_at	117.4	113.5	120.5	131.6	137.8	140.3	1.16591	0.221454	0.00408714	septin 6	Sept6
15140	1430834_at	122.9	121.5	128.2	110.9	103.8	105.8	-1.16256	-0.217303	0.00410009	GPRIN family member 3	Gprin3
31430	1447124_at	155.4	143	164.9	78.2	101.9	102.4	-1.64	-0.713696	0.00410112
7955	1423649_at	586.4	619	568.1	392.5	470.8	404.7	-1.39866	-0.484045	0.00410627	transmembrane protein 68	Tmem68
26938	1442632_at	162.6	138.4	204.2	53.8	57.8	51.4	-3.09939	-1.63198	0.00410709
15322	1431016_at	49	46	54	64.7	62.9	66.4	1.30201	0.380744	0.00413108	CWF19-like 1, cell cycle control (S. pombe)	Cwf19l1
13861	1429555_at	372.4	355.3	369.1	333.3	321.5	330.3	-1.11339	-0.154958	0.00415589	claudin 25	Cldn25
11177	1426871_at	375.3	409.7	418.9	522.6	578.9	518.4	1.34554	0.428189	0.00418491	F-box protein 33	Fbxo33
34735	1450440_at	113.6	115.5	124	90.4	83.8	95.8	-1.30778	-0.387117	0.00420484	glial cell line derived neurotrophic factor family receptor alpha 1	Gfra1
30559	1446253_at	38.5	35.9	33.5	27.8	25.2	25.1	-1.38156	-0.4663	0.00421171
36189	1451894_a_at	248.6	259	251.3	230	228.5	219	-1.12015	-0.163689	0.00427955	sodium channel, voltage-gated, type VIII, alpha	Scn8a
44888	1460596_at	35.1	42.5	43.6	24.5	19.4	23.3	-1.80357	-0.850857	0.00428049	angiotensin II, type I receptor-associated protein	Agtrap
7087	1422781_at	37.5	43.2	40.7	20.7	19.1	27.6	-1.80119	-0.848948	0.00430428	toll-like receptor 3	Tlr3
22331	1438025_at	86.2	84.8	76.7	127.3	110.3	114	1.41946	0.505341	0.0043398	mitochondrial translational release factor 1-like	Mtrf1l
1413	1417082_at	511.9	531.6	546.4	670.7	662.3	613.5	1.22429	0.291946	0.00435339	acidic (leucine-rich) nuclear phosphoprotein 32 family, member B	Anp32b
14204	1429898_at	42.4	45.5	42.1	32.2	32	26.1	-1.43965	-0.525714	0.00436195	oligosaccharyltransferase complex subunit	Ostc
11922	1427616_at	20.5	14.5	14	0.9	1	4.7	-7.42424	-2.89224	0.00437652	predicted gene 13583	Gm13583
35978	1451683_x_at	22.1	13.3	21.8	39.5	39.6	47.9	2.22028	1.15074	0.00438312	histocompatibility 2, D region locus 1	H2-D1
7482	1423176_at	546.4	582.6	573.3	643.1	640.7	626.9	1.12242	0.166616	0.00438568	transducer of ErbB-2.1	Tob1
16072	1431766_x_at	6831.2	6655.2	6150.1	5012.5	4759.3	5322.1	-1.30096	-0.379572	0.00439387	ribosomal protein S2	Rps2
31061	1446755_at	67.6	68	64.5	104.6	109.7	131.7	1.72914	0.790051	0.0044002
22014	1437708_x_at	642.4	465	670.2	205.3	226	223.4	-2.71514	-1.44102	0.00441058	vesicle-associated membrane protein 3	Vamp3
33684	1449384_at	6.3	4.8	1.4	17.2	23.7	17.1	4.64	2.21412	0.00443098	RIKEN cDNA 4931417E11 gene	4931417E11Rik
36893	1452598_at	14.3	14	4.1	31.1	30	34.9	2.96296	1.56704	0.00443853	GINS complex subunit 1 (Psf1 homolog)	Gins1
21710	1437404_at	70.3	79.5	77.7	99.3	104.3	94.2	1.30901	0.388477	0.00444486	microtubule associated serine/threonine kinase family member 4	Mast4
44009	1459714_at	32.2	36.1	49.6	10.4	1.8	2.1	-8.24476	-3.04348	0.00445825
11317	1427011_a_at	1019.8	1178.8	1115.9	824.8	851.6	810.1	-1.333	-0.414675	0.00446742	LanC (bacterial lantibiotic synthetase component C)-like 1	Lancl1
30162	1445856_at	27.6	29.3	27.6	17.4	17.8	22	-1.47727	-0.562936	0.00447269	family with sequence similarity 178, member A	Fam178a
26328	1442022_at	10.4	21.4	20.1	38.3	38.9	44.9	2.3526	1.23426	0.00449661	thymocyte selection associated	Themis
41342	1457047_at	37.5	44.9	46.6	12.3	1.6	18.2	-4.01869	-2.00673	0.00449667
2336	1418005_at	1843.9	1884.9	1751.6	1540.3	1359.5	1450.4	-1.2598	-0.333199	0.00450702	succinate dehydrogenase complex, subunit B, iron sulfur (Ip)	Sdhb
8740	1424434_at	232.1	234.1	233.5	205.6	190.8	208.4	-1.15691	-0.210278	0.00450778	methyltransferase like 22	Mettl22
23	1415692_s_at	2102.5	2089.3	2104.3	2195.4	2201	2258.8	1.05704	0.0800236	0.00452875	calnexin	Canx
10182	1425876_a_at	67.7	68.9	73.8	50.4	56.6	56.2	-1.28922	-0.366494	0.00454366	glucuronyl C5-epimerase	Glce
39690	1455395_at	74.6	80.5	76.6	58.5	45.4	44.6	-1.56027	-0.641795	0.00455007	3-oxoacyl-ACP synthase, mitochondrial	Oxsm
7903	1423597_at	1411.9	1424.3	1197.6	915.3	805.1	907	-1.53528	-0.618504	0.00456427	ATPase, aminophospholipid transporter (APLT), class I, type 8A, member 1	Atp8a1
4819	1420513_at	111.3	91.3	86.8	46.2	55.1	51.1	-1.89895	-0.925202	0.00456711	EF-hand calcium binding domain 2	Efcab2
17974	1433668_at	791.4	806	804.5	980.7	984.1	902.5	1.19376	0.255517	0.00457964	proline-rich nuclear receptor coactivator 1	Pnrc1
3687	1419356_at	184.7	184.5	176.1	147.7	134.3	120.7	-1.35411	-0.437345	0.00458921	Kruppel-like factor 7 (ubiquitous)	Klf7
15457	1431151_at	45.2	36.3	38.6	21	18.3	10.7	-2.402	-1.26424	0.00458951	lipase, member O2 /// gastric triacylglycerol lipase-like	Lipo2 /// LOC101055671
14619	1430313_at	3.3	1.5	6.2	11.2	13.7	12.7	3.41818	1.77323	0.00462029	ADAMTS-like 1	Adamtsl1
7201	1422895_at	984.6	930.5	936.3	1050.5	1073.5	1095.1	1.12895	0.174987	0.00463615	vesicle-associated membrane protein 4	Vamp4
1180	1416849_at	920.1	859.9	890.2	789	774.2	793.2	-1.13317	-0.180363	0.00464285	CDGSH iron sulfur domain 1	Cisd1
34425	1450130_at	214.5	213.8	215.1	297.3	327	275.4	1.39835	0.483728	0.00464628	xenotropic and polytropic retrovirus receptor 1	Xpr1
14470	1430164_a_at	69.7	70.1	69.9	36	51.9	42.9	-1.60321	-0.680964	0.00464744	growth factor receptor bound protein 10	Grb10
11052	1426746_at	247.8	264.1	269.3	308.9	303.7	325.1	1.20033	0.263434	0.00465211	RIKEN cDNA 1810026J23 gene	1810026J23Rik
5603	1421297_a_at	113.2	122.7	114.1	153.9	144.6	165	1.32429	0.405214	0.00465905	calcium channel, voltage-dependent, L type, alpha 1C subunit	Cacna1c
389	1416058_s_at	4129.2	4200.3	3835	3388.3	3374.4	3448.4	-1.1913	-0.252539	0.00466167	ATP synthase, H+ transporting, mitochondrial F1 complex, gamma polypeptide 1	Atp5c1
43127	1458832_at	10.3	14.1	14.9	22.6	21	23.9	1.71756	0.780358	0.00467255
352	1416021_a_at	3640.9	3371	3485.2	2973.1	2773.5	2980.2	-1.20286	-0.266466	0.00467412	fatty acid binding protein 5, epidermal	Fabp5
19061	1434755_at	396.9	395.1	365.2	553.6	484.4	508.3	1.33624	0.418182	0.0046766	coronin, actin binding protein, 2B	Coro2b
18794	1434488_at	203.5	181.3	169.9	101.3	114.1	127.3	-1.61862	-0.694762	0.00467929	ADP-ribosylation factor related protein 1	Arfrp1
23728	1439422_a_at	286.1	381.7	343.8	182.6	159.1	131.3	-2.13869	-1.09673	0.00468396	family with sequence similarity 132, member A	Fam132a
540	1416209_at	1587.7	1499.1	1446.3	1157.3	1141.8	1265.3	-1.27177	-0.346839	0.00468528	glutamate dehydrogenase 1	Glud1
12587	1428281_at	99.8	105.3	112.3	72	79.3	62.5	-1.48457	-0.57004	0.0046893	TruB pseudouridine (psi) synthase homolog 1 (E. coli)	Trub1
42633	1458338_x_at	4	11.6	12.4	26.6	25.4	23.8	2.70714	1.43677	0.00469088	nuclear receptor subfamily 2, group C, member 1	Nr2c1
7310	1423004_at	13.2	12.7	11.3	3.3	6.3	1.4	-3.38182	-1.7578	0.00471894	vasoactive intestinal peptide receptor 1	Vipr1
2010	1417679_at	3.3	3.3	1.2	9.7	10.9	14.5	4.5	2.16993	0.00475274	growth factor independent 1	Gfi1
16209	1431903_at	18	19.3	12	2.7	2.8	4.4	-4.9798	-2.31609	0.00476038	RIKEN cDNA 4930524C18 gene	4930524C18Rik
987	1416656_at	113.3	120.2	110.9	94.4	96.5	99.6	-1.18554	-0.245547	0.0047812	chloride intracellular channel 1	Clic1
41219	1456924_at	39.5	40.4	33.3	24.9	21.6	19	-1.72824	-0.789307	0.00480742	expressed sequence AW492981	AW492981
22355	1438049_at	520.8	540.2	558.5	642.7	668.9	716	1.25199	0.324225	0.00481367	uncharacterized LOC101056057	LOC101056057
10495	1426189_at	59.8	54.2	64.7	38.8	38.7	43.4	-1.47808	-0.563725	0.00481592	dual specificity phosphatase-like 15	Dusp15
26971	1442665_at	1.4	2.2	2.8	16	10.1	16.8	6.70313	2.74483	0.00481628
32498	1448198_a_at	2105.5	2227.6	2093.1	1835.1	1837.8	1702.5	-1.19548	-0.257594	0.00481739	NADH dehydrogenase (ubiquinone) 1 beta subcomplex 8	Ndufb8
33070	1448770_a_at	2137.5	2077	2255.1	1793.3	1863.4	1853.5	-1.17411	-0.231572	0.00486098	ATPase inhibitory factor 1	Atpif1
30228	1445922_at	61.9	61.7	56.3	36.3	44.6	33	-1.57946	-0.659427	0.00489795
40840	1456545_at	30.2	37.3	26.2	3	12.4	4.2	-4.78061	-2.2572	0.00490164	interleukin 18 receptor accessory protein	Il18rap
20063	1435757_a_at	2510.6	2580	2375.8	2145.9	2163.9	2133.7	-1.15875	-0.212568	0.00490307	ubiquinol cytochrome c reductase core protein 2	Uqcrc2
8475	1424169_at	56.9	49	55.3	23.3	18.8	33.8	-2.12385	-1.08668	0.00491687	Tax1 (human T cell leukemia virus type I) binding protein 3	Tax1bp3
42207	1457912_at	26.2	31.1	21.6	3.1	9.9	8.2	-3.7217	-1.89596	0.00491714	RIKEN cDNA E130317F20 gene	E130317F20Rik
26557	1442251_at	42.5	45.6	36.4	23.9	27.1	25.4	-1.62958	-0.704501	0.00494863	valosin containing protein (p97)/p47 complex interacting protein 1	Vcpip1
3878	1419547_at	99	113.3	117.3	75.8	80.7	76.1	-1.41702	-0.502865	0.00500083	fumarylacetoacetate hydrolase domain containing 1	Fahd1
10190	1425884_at	129.5	133	109.7	85.8	77.7	74.5	-1.56387	-0.645116	0.00500904	ribosome production factor 2 homolog (S. cerevisiae)	Rpf2
3697	1419366_at	107.2	122.9	131.7	77.7	77.3	82.9	-1.52081	-0.604837	0.00502643	zinc finger, matrin type 5	Zmat5
10392	1426086_a_at	70.4	68.6	76.7	94.8	95.6	87	1.28605	0.362942	0.00503666	fragile X mental retardation syndrome 1	Fmr1
27471	1443165_at	15.1	18.1	14.1	9.4	7.3	7.3	-1.97083	-0.978806	0.00504365	mitochondrial ribosomal protein S31	Mrps31
19945	1435639_at	9.9	8.5	18.9	33.2	31.3	29.8	2.52815	1.33808	0.00505044	RIKEN cDNA 2610528A11 gene	2610528A11Rik
21107	1436801_x_at	152.7	149.2	142.6	122.8	126.9	131.1	-1.16728	-0.22315	0.0050755	CDC42 effector protein (Rho GTPase binding) 4	Cdc42ep4
12176	1427870_x_at	92.7	95.9	106.1	72.7	65.5	74.6	-1.38487	-0.469749	0.00508372	Parts of antibodies, mostly variable regions. /// immunoglobulin heavy constant mu	abParts /// Ighm
14732	1430426_at	13.8	14.3	16.4	7.7	5.5	2.4	-2.85256	-1.51226	0.00511046	RIKEN cDNA 4930540M05 gene	4930540M05Rik
12319	1428013_at	84.4	77	68.7	50.6	52.7	48.7	-1.51382	-0.59819	0.00511247	RIKEN cDNA 6030458C11 gene	6030458C11Rik
33223	1448923_at	127.3	149	152	88.9	101.9	88.8	-1.53183	-0.615257	0.00512367	protein kinase, interferon inducible double stranded RNA dependent activator	Prkra
32053	1447747_x_at	34.4	38.3	44.9	16.8	22	13.7	-2.24	-1.1635	0.00513604	adenosine deaminase-like	Adal
28475	1444169_at	45.4	55.1	44.9	66	67.5	68.7	1.39065	0.475756	0.00515149	RIKEN cDNA 3110052M02 gene	3110052M02Rik
4252	1419933_at	29.5	29.1	23.4	15.4	8.5	9.5	-2.45509	-1.29578	0.00515183	p53 and DNA damage regulated 1	Pdrg1
34224	1449929_at	2282.9	2322.6	2260.2	2018.5	2122.1	1989.3	-1.12003	-0.163543	0.00517098	dynein light chain Tctex-type 3	Dynlt3
44799	1460507_at	4	5.4	3.6	16.6	15.3	23.3	4.24615	2.08616	0.00518183	RIKEN cDNA 4930552P12 gene	4930552P12Rik
44253	1459960_at	10.5	7.1	13	0.4	0.9	0.8	-14.5714	-3.86507	0.00521005	RIKEN cDNA 8430419K02 gene	8430419K02Rik
24611	1440305_at	40.4	27.6	38.9	140.2	211.5	144.2	4.63891	2.21379	0.00524962
28542	1444236_at	50.2	49.4	48.2	43.4	38.6	40.9	-1.2026	-0.266161	0.0052504	expressed sequence AW552393	AW552393
22720	1438414_at	12.5	14.8	18.8	4.9	4	1	-4.65657	-2.21927	0.00525723	fukutin related protein	Fkrp
7029	1422723_at	17.2	23.8	19.3	3.3	6.8	8.7	-3.20745	-1.68143	0.00527523	stimulated by retinoic acid gene 6	Stra6
11127	1426821_at	106.5	94.9	106.3	77.1	73.7	82	-1.32174	-0.402433	0.00527924	component of oligomeric golgi complex 8	Cog8
17751	1433445_x_at	1778.6	1651.5	1850.9	1364.5	1449.4	1419.4	-1.24749	-0.319028	0.00528719	3-hydroxy-3-methylglutaryl-Coenzyme A synthase 1	Hmgcs1
12856	1428550_at	138.3	137.8	136.7	123.8	115.1	124.2	-1.13688	-0.185076	0.00529099	YdjC homolog (bacterial)	Ydjc
5586	1421280_at	709.7	622.1	671.7	520.5	498.9	533.5	-1.29017	-0.367558	0.00531845	gamma-aminobutyric acid (GABA) A receptor, subunit alpha 1	Gabra1
6994	1422688_a_at	91.2	83.2	84.1	68	64.9	56.9	-1.36196	-0.445684	0.00532796	neuroblastoma ras oncogene	Nras
31660	1447354_at	4.6	6	7.7	1.5	0.3	0.5	-7.95652	-2.99214	0.0053363
970	1416639_at	58.3	85.9	84.3	11.5	27.1	3.5	-5.42755	-2.4403	0.00535935	solute carrier family 2 (facilitated glucose transporter), member 5	Slc2a5
44630	1460338_a_at	131.9	147.2	142.8	91.7	99.4	111.2	-1.39563	-0.48092	0.00538222	cytokine receptor-like factor 3	Crlf3
13573	1429267_at	222.9	242	230	196.7	185.6	198.8	-1.19584	-0.258019	0.00538272	acyl-CoA thioesterase 11	Acot11
37468	1453173_at	88.6	102.2	100.5	28.8	55.1	52.6	-2.13407	-1.0936	0.00538594	aldo-keto reductase family 1, member B10 (aldose reductase)	Akr1b10
12465	1428159_s_at	1612.9	1666.1	1686.4	1520.9	1453	1501.5	-1.10949	-0.149893	0.00539443	NADH dehydrogenase (ubiquinone) 1, alpha/beta subcomplex, 1	Ndufab1
38283	1453988_a_at	129.6	116.8	140.9	86.2	81.2	92.8	-1.48847	-0.573831	0.0053949	insulin degrading enzyme	Ide
28814	1444508_s_at	71.6	67.7	63.7	46.2	29.6	39.5	-1.76062	-0.816087	0.00539569	arrestin domain containing 1	Arrdc1
20290	1435984_at	131.5	133.8	173.5	61	60.5	76.7	-2.21393	-1.14661	0.0053967	zinc finger protein 40	Zfp40
17177	1432871_at	28.3	19.9	28.6	10.5	7.5	4.9	-3.35371	-1.74576	0.00539737	RIKEN cDNA 4932429P19 gene	4932429P19Rik
12196	1427890_a_at	52.7	49.7	55.7	36.6	30.4	39.3	-1.4873	-0.572696	0.0054116	leucine rich repeat containing 56	Lrrc56
30248	1445942_at	4.5	8	6.3	0.9	0.7	0.5	-8.95238	-3.16227	0.00542282	expressed sequence AU015858	AU015858
29676	1445370_at	51.5	55.9	51.1	38.1	41.1	33	-1.41266	-0.49841	0.00542673
22987	1438681_at	54.4	52	60	72.1	70.2	77.7	1.32212	0.402848	0.00544974	alkB, alkylation repair homolog 1 (E. coli)	Alkbh1
12718	1428412_at	525.5	496.9	508.8	458.3	450.3	466.5	-1.11352	-0.155126	0.00545453	transmembrane 9 superfamily member 3	Tm9sf3
25576	1441270_at	15.4	21.3	21.9	4.4	4	8.6	-3.44706	-1.78537	0.00549405
7377	1423071_x_at	128.4	136.2	138.2	187.1	180	162.9	1.31579	0.395929	0.0055054	RIKEN cDNA 6720475J19 gene	6720475J19Rik
13614	1429308_at	24.7	30.6	41.8	2.6	6.8	2.6	-8.09167	-3.01644	0.00551266	PR domain containing 16	Prdm16
1276	1416945_at	29.3	55.4	48.7	89.6	99.1	86.6	2.06372	1.04525	0.00552216	prostate tumor over expressed gene 1	Ptov1
32930	1448630_a_at	895.6	865.2	854.2	725.8	720.8	632.2	-1.25794	-0.33106	0.00552479	succinate dehydrogenase complex, subunit C, integral membrane protein	Sdhc
22958	1438652_x_at	873.5	887.9	854	744.1	687.4	766.7	-1.18979	-0.250709	0.00553276	phosphatidylinositol glycan anchor biosynthesis, class Q	Pigq
19556	1435250_at	161.8	144.8	147.8	211.3	232.5	197.5	1.41131	0.497037	0.00553511	integrator complex subunit 8	Ints8
1673	1417342_at	91.4	86.6	92.4	99.3	101.7	102.4	1.12204	0.166126	0.00553531	protein phosphatase 1, regulatory (inhibitor) subunit 2	Ppp1r2
44037	1459742_at	13	9.4	9.4	0.5	3.9	2.1	-4.89231	-2.29052	0.00554795
38991	1454696_at	1930.1	1386	1168.1	2805.3	2689.5	2726.7	1.83344	0.874551	0.00555565	guanine nucleotide binding protein (G protein), beta 1	Gnb1
29747	1445441_at	27.9	22.9	24.6	12.2	15.8	9.6	-2.00532	-1.00383	0.00558193	predicted gene 5142	Gm5142
21487	1437181_at	154.3	168.3	181.9	246.3	225.8	218.9	1.36967	0.453831	0.00558845	pellino 2	Peli2
40950	1456655_at	212.7	244.1	193.8	123.5	96	132.6	-1.84777	-0.885786	0.0055931
38331	1454036_a_at	225.5	204.4	189.7	275.1	278.9	259.7	1.31327	0.39316	0.00560996	ubiquitin specific peptidase 15	Usp15
19960	1435654_at	4	3.5	3.6	2.2	2.6	1.8	-1.68182	-0.750022	0.00562686	coiled-coil domain containing 14	Ccdc14
5944	1421638_at	14.1	14	12.1	6.8	7.3	9.4	-1.71064	-0.774535	0.00564506	pregnancy specific glycoprotein 17	Psg17
12058	1427752_a_at	9.1	12.6	10.5	4.7	4.6	5.6	-2.16107	-1.11175	0.00564868	T cell receptor beta, joining region /// RecName: Full=T-cell receptor beta chain V region PHDS203; Flags: Precursor; Fragment; /// T cell receptor beta, variable 29	Tcrb-J /// TRB /// Trbv29
5104	1420798_s_at	1009.7	987.5	1001.6	865.4	910.2	922.5	-1.11145	-0.152441	0.00564989	protocadherin alpha 1 /// protocadherin alpha 10 /// protocadherin alpha 11 /// protocadherin alpha 12 /// protocadherin alpha 2 /// protocadherin alpha 3 /// protocadherin alpha 4 /// protocadherin alpha 5 /// protocadherin alpha 6 /// protocadherin alpha 7 /// protocadherin alpha 8 /// protocadherin alpha 9 /// protocadherin alpha subfamily C, 1 /// protocadherin alpha subfamily C, 2	Pcdha1 /// Pcdha10 /// Pcdha11 /// Pcdha12 /// Pcdha2 /// Pcdha3 /// Pcdha4 /// Pcdha5 /// Pcdha6 /// Pcdha7 /// Pcdha8 /// Pcdha9 /// Pcdhac1 /// Pcdhac2
2259	1417928_at	101.6	94.7	100.5	128.9	135.8	118.9	1.29245	0.370112	0.005671	PDZ and LIM domain 4	Pdlim4
30093	1445787_at	13.9	12.7	14.6	33.9	24.2	29.4	2.12379	1.08664	0.00568459	coiled-coil domain containing 162	Ccdc162
21864	1437558_at	113.9	96.9	113.9	156.5	175	195.1	1.6218	0.6976	0.00575957
17274	1432968_at	88.3	75.4	88.3	62.1	57.8	54.9	-1.44165	-0.527719	0.00576227	RIKEN cDNA 4930456A14 gene	4930456A14Rik
39036	1454741_s_at	217.3	226.5	197	162	150.7	133.3	-1.43677	-0.52283	0.0057649	transmembrane protein 164	Tmem164
664	1416333_at	29.6	30.3	25.2	9.6	15.6	16.5	-2.04077	-1.02911	0.00577897	docking protein 2	Dok2
41857	1457562_at	54.3	43.9	46.4	65.4	65.9	70.7	1.39696	0.482288	0.00579318	ribosomal protein S6 kinase, polypeptide 1	Rps6kb1
3903	1419572_a_at	53.1	51.8	52.3	40.5	43.3	46.2	-1.20923	-0.27409	0.00580894	ATP-binding cassette, sub-family D (ALD), member 4	Abcd4
16449	1432143_a_at	145.9	126.2	139.2	103.6	108.1	103.1	-1.30654	-0.385756	0.00583356	high mobility group box transcription factor 1	Hbp1
31672	1447366_at	10.2	16	17.4	3	2.7	2.3	-5.45	-2.44626	0.00584076
1891	1417560_at	733.9	746.3	553.8	1049.1	988.9	1069.9	1.52797	0.61162	0.00584369	sideroflexin 1	Sfxn1
15095	1430789_at	20.7	27.1	31.9	6.7	10.3	7.9	-3.2008	-1.67843	0.00587368	RIKEN cDNA 4930452B06 gene	4930452B06Rik
19433	1435127_a_at	193.1	197.7	198	164.3	133.6	143.4	-1.33424	-0.416018	0.00588828	O-sialoglycoprotein endopeptidase-like 1	Osgepl1
38597	1454302_at	16.2	21.4	12.7	41.4	31.9	40.8	2.26839	1.18167	0.00589967	RIKEN cDNA 5730410E19 gene	5730410E19Rik
37946	1453651_a_at	1622.9	1564	1519	1352	1185.8	1261.2	-1.23872	-0.308851	0.0059541	mitochondrial pyruvate carrier 1	Mpc1
40388	1456093_at	109.2	102.9	113.9	129.1	136.1	143.1	1.25245	0.324758	0.00596385	zinc finger protein 536	Zfp536
22481	1438175_x_at	14.2	8.3	13	1.9	0.8	2.7	-6.57407	-2.71679	0.00596802	myomesin 2	Myom2
13023	1428717_at	428.3	462	418.7	356.4	362.3	331.2	-1.24679	-0.318213	0.00599611	secernin 1	Scrn1
30704	1446398_at	7.4	9.7	9.4	2.2	1.1	4.3	-3.48684	-1.80192	0.00600455	uncharacterized LOC433197	LOC433197
32889	1448589_at	2221.1	2057.9	2057.3	1828.3	1824.1	1810	-1.15998	-0.214106	0.00601537	NADH dehydrogenase (ubiquinone) 1 beta subcomplex, 5	Ndufb5
28502	1444196_at	34.5	39.1	42.2	23.4	20.5	26.6	-1.64255	-0.71594	0.00607313	expressed sequence AI662501	AI662501
1097	1416766_at	377.7	429.2	376.9	292.7	309.3	293.3	-1.32224	-0.402982	0.00607612	mitochondrial amidoxime reducing component 2	Marc2
1146	1416815_s_at	777.5	746.8	763.3	808.1	825.5	829.5	1.07672	0.10664	0.00608782	budding uninhibited by benzimidazoles 3 homolog (S. cerevisiae)	Bub3
16176	1431870_at	10.4	9.5	13.3	1.7	0.6	4.6	-4.81159	-2.26651	0.00609423	RIKEN cDNA 4930463O16 gene	4930463O16Rik
43932	1459637_at	5.8	6.8	9.4	1.8	1.7	1.2	-4.68085	-2.22677	0.00610286
9021	1424715_at	71.6	80.1	80.1	43.2	48.3	58	-1.5505	-0.632735	0.00611849	retinol saturase (all trans retinol 13,14 reductase)	Retsat
9675	1425369_a_at	9.1	4.6	6.4	26	17.4	21.3	3.21891	1.68657	0.00611895	SRY (sex determining region Y)-box 10	Sox10
6992	1422686_s_at	288.7	264.5	276.7	214.6	173.2	208.8	-1.39105	-0.476174	0.00613823	exocyst complex component 4	Exoc4
29287	1444981_at	15.6	18.5	17.3	6.2	11	6.8	-2.14167	-1.09873	0.00615383	immunoglobulin superfamily, DCC subclass, member 3	Igdcc3
13654	1429348_at	176.1	184.3	171.9	156.5	149.7	143.6	-1.18341	-0.242956	0.00617509	sema domain, immunoglobulin domain (Ig), short basic domain, secreted, (semaphorin) 3C	Sema3c
33772	1449472_at	184.7	212	205.7	148.3	159.1	155.1	-1.30249	-0.381268	0.00617613	G-protein coupled receptor 12	Gpr12
36017	1451722_s_at	206.2	211.3	219.7	172.4	170.7	187.8	-1.20023	-0.263306	0.00617885	SET and MYND domain containing 5	Smyd5
7427	1423121_at	141.6	135.7	125.2	98	72.7	90.7	-1.53979	-0.62273	0.00619421	insulin degrading enzyme	Ide
3037	1418706_at	253	281	266.5	213	220.4	226	-1.21398	-0.279748	0.00619591	solute carrier family 38, member 3	Slc38a3
20216	1435910_at	60	59.6	55	69.3	70.9	66.6	1.18442	0.244183	0.00621131	fatty acid desaturase 3	Fads3
36970	1452675_at	200.5	205	191.4	234.4	227.9	248.2	1.19032	0.251345	0.00625381	RNA binding motif protein 22	Rbm22
12868	1428562_at	413	443.7	447.2	369.8	374	348.6	-1.19361	-0.255332	0.00626513	Mir22 host gene (non-protein coding)	Mir22hg
39739	1455444_at	373.3	463.9	562.1	858.5	890.7	747.8	1.78446	0.835491	0.00626827	gamma-aminobutyric acid (GABA) A receptor, subunit alpha 2	Gabra2
2343	1418012_at	384.2	410	400.5	355	354.6	361.4	-1.1155	-0.15769	0.00628315	SH3-domain GRB2-like B1 (endophilin)	Sh3glb1
20509	1436203_a_at	16.4	15.2	10.8	27.4	25.1	23.1	1.78302	0.834322	0.00629141	RIKEN cDNA 1110059G02 gene /// syntrophin, basic 1	1110059G02Rik /// Sntb1
129	1415798_at	91.2	82.5	79.8	59	67	59.1	-1.36953	-0.453681	0.00629298	discoidin domain receptor family, member 1	Ddr1
21829	1437523_s_at	0.4	0.9	2.3	7.9	9.7	13.5	8.63889	3.11085	0.00629407	sarcoglycan, gamma (dystrophin-associated glycoprotein)	Sgcg
5659	1421353_at	223.3	208.5	226.1	258.3	280.2	289.9	1.25916	0.332459	0.0062945	phosphodiesterase 7B	Pde7b
13129	1428823_at	200.6	236.8	220.4	164.4	164.9	163.6	-1.33455	-0.416354	0.00630236	HD domain containing 2	Hddc2
37292	1452997_at	1743.3	1489.2	1596.8	1979.8	2001.6	2040.7	1.24699	0.318453	0.00630593	cadherin 11 pseudogene	2610005L07Rik
40333	1456038_at	215.4	227.1	220.1	169.9	191.3	186.4	-1.21001	-0.275016	0.00632729	F-box and leucine-rich repeat protein 4	Fbxl4
32984	1448684_at	2637.4	2768.5	2678.6	2985.8	3208.9	3210	1.1633	0.218223	0.00634499	protein phosphatase 1, regulatory (inhibitor) subunit 2	Ppp1r2
38916	1454621_s_at	344.4	324	287.3	226.8	236.2	219	-1.40132	-0.486786	0.00636512	family with sequence similarity 73, member B	Fam73b
8258	1423952_a_at	31.7	19.3	35.3	2.1	4.9	1.3	-10.3976	-3.37818	0.00636595	keratin 7	Krt7
15343	1431037_a_at	188	178.5	178.6	209.9	228.5	211.8	1.19281	0.254363	0.00637541	ELAV (embryonic lethal, abnormal vision)-like 1 (Hu antigen R)	Elavl1
17752	1433446_at	614	559.9	561.1	468.1	469.4	492.2	-1.21354	-0.279223	0.00640675	3-hydroxy-3-methylglutaryl-Coenzyme A synthase 1	Hmgcs1
32602	1448302_at	135.5	133	137.6	148	152.1	158.6	1.12952	0.175716	0.00643669	potassium channel tetramerisation domain containing 20	Kctd20
7885	1423579_a_at	21	18	21.3	42.1	32.1	42.9	1.94196	0.957511	0.00644967	transient receptor potential cation channel, subfamily C, member 4	Trpc4
57	1415726_at	891.9	875.2	866.8	928.2	963.3	966.7	1.08516	0.117906	0.00646652	ankyrin repeat domain 17	Ankrd17
39094	1454799_at	100.7	112.7	111.5	81.9	63.4	61.3	-1.5726	-0.653155	0.00649342	1-acylglycerol-3-phosphate O-acyltransferase 9	Agpat9
25068	1440762_at	4.1	1.1	5.5	13.1	21.1	18.4	4.91589	2.29745	0.00650247	synapsin II	Syn2
12037	1427731_at	23.9	23	21	11.3	4.1	11.7	-2.50554	-1.32512	0.00650253	gonadotropin releasing hormone receptor	Gnrhr
7270	1422964_at	138.9	132.5	128.2	111.6	107.4	96.9	-1.26496	-0.339089	0.00651049	RAD23a homolog (S. cerevisiae)	Rad23a
10774	1426468_at	223.7	239.7	234.9	182.4	203	182.1	-1.23048	-0.299227	0.00651898	RIKEN cDNA 0610037L13 gene	0610037L13Rik
37467	1453172_at	145.7	145.3	160.3	178.5	174.3	178.4	1.17704	0.235168	0.00653067	heat shock protein 70 family, member 13	Hspa13
30487	1446181_at	44.8	42.9	38.4	14.3	25.8	23.6	-1.97959	-0.985203	0.0065323
35348	1451053_a_at	48.5	51.4	49.9	32.1	38.8	39.6	-1.35566	-0.438991	0.0065327	transformed mouse 3T3 cell double minute 1	Mdm1
44607	1460315_s_at	724.1	748.9	749.3	804.6	854.2	855.8	1.13153	0.178275	0.00654362	TANK-binding kinase 1	Tbk1
12599	1428293_at	495.7	530.8	473.5	620.9	590.6	644.6	1.2374	0.307312	0.00654677	biorientation of chromosomes in cell division 1	Bod1
40225	1455930_at	47.6	48.2	55	64.2	73.7	72.8	1.39721	0.482554	0.00655977
12284	1427978_at	167.5	167.1	150.5	195.4	201.8	190	1.21047	0.27557	0.0065621	EF-hand calcium binding domain 14	Efcab14
4242	1419923_at	39.1	22.7	26.5	3.8	3.1	4.2	-7.95495	-2.99185	0.00660083
11336	1427030_at	120.9	123	124.6	139.5	133.8	144	1.13243	0.17942	0.00660202	spindle and centriole associated protein 1	Spice1
21096	1436790_a_at	127.6	153.3	193.7	62.9	57.6	48.7	-2.80496	-1.48798	0.00663823	SRY (sex determining region Y)-box 11	Sox11
40670	1456375_x_at	229.8	264.7	257.6	165.2	115.1	89.5	-2.0338	-1.02418	0.00665322	tripartite motif-containing 27	Trim27
36299	1452004_at	5.2	0.7	0.9	18	14.7	11.4	6.48529	2.69717	0.00665382	calcitonin/calcitonin-related polypeptide, alpha	Calca
39364	1455069_x_at	4129	4102.2	3868.6	3577.1	3552.6	3634.1	-1.12412	-0.168796	0.00665476	solute carrier family 25 (mitochondrial carrier, adenine nucleotide translocator), member 4	Slc25a4
19722	1435416_x_at	905.3	887.1	821.8	748	702	695	-1.21874	-0.285392	0.00670161	phosphatidylinositol glycan anchor biosynthesis, class Q	Pigq
33642	1449342_at	345.3	374.5	348.2	413.7	445.9	419.1	1.19728	0.259766	0.0067061	protein tyrosine phosphatase-like (proline instead of catalytic arginine), member b	Ptplb
31553	1447247_at	59.5	58.5	64.4	47.7	46.1	51.4	-1.2562	-0.329064	0.00672236
8872	1424566_s_at	127.9	106.2	121.6	76.9	74.6	87.4	-1.48891	-0.574254	0.00672568	polymerase (RNA) III (DNA directed) polypeptide D	Polr3d
20635	1436329_at	1870.7	1873.9	1832.4	2333.6	2243.6	2094.9	1.19636	0.258652	0.00673869	early growth response 3	Egr3
37782	1453487_at	60.5	61.3	72	42.2	35.9	27.1	-1.84221	-0.881434	0.00675608	dihydrodiol dehydrogenase (dimeric)	Dhdh
4520	1420201_at	2	2.7	2.1	5.4	8.4	8.1	3.22059	1.68732	0.00677682
37537	1453242_x_at	8.4	11.7	17	28.6	24.6	30.1	2.24528	1.1669	0.00678081	RIKEN cDNA 2810047C21 gene 1	2810047C21Rik1
19894	1435588_at	83.5	164.2	97.7	296.3	277.3	237.9	2.34945	1.23232	0.00680175	WD repeat and FYVE domain containing 1	Wdfy1
36079	1451784_x_at	119.9	132.5	95.7	206.2	173.1	205.7	1.68055	0.748935	0.00681627	histocompatibility 2, D region locus 1	H2-D1
31739	1447433_at	32.4	29.4	25.6	18.7	14.6	12.3	-1.91667	-0.938599	0.00683442	WD repeat and FYVE domain containing 3	Wdfy3
23058	1438752_at	1054.5	1090.1	1065.6	910	866.2	965.1	-1.17105	-0.227803	0.00685109	RIKEN cDNA A230058F20 gene	A230058F20Rik
21130	1436824_x_at	414.8	418.8	397	375.8	359.7	369.5	-1.11367	-0.155316	0.00688059	ring finger protein 26	Rnf26
32151	1447845_s_at	1.4	1.4	2.9	5.6	5.6	7.7	3.31579	1.72935	0.0069106	vanin 1	Vnn1
1203	1416872_at	102.4	110	116.7	132.5	144.1	135.4	1.2519	0.324118	0.00692065	tetraspanin 6	Tspan6
43008	1458713_at	19.7	22.3	20.3	14.9	13.4	10.4	-1.60982	-0.686899	0.00692286
30175	1445869_at	32.3	34.6	28.6	45.7	42	49.1	1.43246	0.518496	0.00693382
39769	1455474_at	27.7	24.1	23.8	48.7	37.4	47.3	1.76455	0.819301	0.00693588	family with sequence similarity 21	Fam21
21660	1437354_at	247.2	227.9	251.2	185.6	193.3	205.6	-1.2426	-0.313363	0.00694929	RIKEN cDNA C230091D08 gene	C230091D08Rik
32060	1447754_x_at	171.2	185.7	209.6	133.9	106.8	109.9	-1.6158	-0.69225	0.00695431	THAP domain containing 4	Thap4
10251	1425945_at	9.8	12.2	12.3	6.2	2	3.5	-2.93162	-1.5517	0.00695921	zinc finger protein 626	Zfp626
2857	1418526_at	206.7	193.5	204.2	236.6	267.9	265.1	1.27333	0.348605	0.00696049	serine/arginine-rich splicing factor 10	Srsf10
36625	1452330_a_at	86.5	45.3	42.4	138.2	126.8	133	2.28473	1.19202	0.00696579	matrix-remodelling associated 8	Mxra8
43050	1458755_at	28	27.2	32	15.7	3.3	5.5	-3.55918	-1.83155	0.00698381
15526	1431220_at	26.6	26.1	27.3	15	6.2	14.6	-2.23464	-1.16004	0.00699233	uncharacterized LOC102642487	LOC102642487
32332	1448027_at	180.8	175.7	170.7	142.4	154.8	136.6	-1.21531	-0.28132	0.00699879	nuclear receptor coactivator 3	Ncoa3
39804	1455509_at	141.2	152.2	144.6	113	121.8	126.1	-1.21363	-0.279332	0.00700361	NAC alpha domain containing	Nacad
24249	1439943_at	23.3	21.1	27.3	37.1	48.6	46	1.83682	0.87721	0.00701325	vacuolar protein sorting 54 (yeast)	Vps54
21902	1437596_at	22.3	13.8	14.1	1.6	1.2	3.5	-7.96825	-2.99426	0.00702032	Ly6/Plaur domain containing 4	Lypd4
44701	1460409_at	143.2	155.9	157.3	127.9	119.2	112.4	-1.26954	-0.344307	0.00702113	carnitine palmitoyltransferase 1a, liver	Cpt1a
12091	1427785_x_at	389.5	390.8	388.8	417.9	431.5	446.6	1.10855	0.148667	0.00702851	calpain 15	Capn15
8078	1423772_x_at	3642.7	3461.8	3333.2	3012	2898.2	2758.9	-1.20401	-0.26785	0.0070316	solute carrier family 25 (mitochondrial carrier, adenine nucleotide translocator), member 5	Slc25a5
16862	1432556_a_at	32.3	28.8	41.7	55.3	60.8	53.8	1.65272	0.724846	0.0070657	family with sequence similarity 183, member B	Fam183b
6816	1422510_at	193.5	162.3	190.4	260.1	234.7	241.7	1.34841	0.431256	0.00707528	CTD (carboxy-terminal domain, RNA polymerase II, polypeptide A) small phosphatase-like	Ctdspl
37723	1453428_at	61.3	63.6	74.2	44.3	41.9	47.5	-1.48915	-0.574494	0.00707843	shisa homolog 9 (Xenopus laevis)	Shisa9
35244	1450949_at	121.5	121.1	118.5	141.5	140.6	131.2	1.14456	0.194791	0.00708099	katanin p60 (ATPase-containing) subunit A1	Katna1
40322	1456027_at	131.9	136.4	127.2	149	156.8	162.8	1.18483	0.244679	0.00708465	RNA binding motif protein 41	Rbm41
28771	1444465_at	21.7	21.2	17.9	32.7	28.5	28.2	1.47039	0.556204	0.00711406	ubiquitination factor E4B	Ube4b
34146	1449851_at	241.2	245.3	263.2	213.3	199.3	189.1	-1.24597	-0.317269	0.00714998	period circadian clock 1	Per1
43014	1458719_at	252.3	225.8	134.2	25.2	18	24.5	-9.04431	-3.17701	0.00716253
21331	1437025_at	1.4	2.4	3.3	6.6	5.2	5.7	2.46479	1.30146	0.00716726	CD28 antigen	Cd28
15367	1431061_s_at	108.9	119.4	138.5	228.3	203.2	181	1.66985	0.739716	0.00716902	pellino 1	Peli1
29168	1444862_at	4.9	3.9	4.1	2.8	2	2.2	-1.84286	-0.881944	0.00718452
23174	1438868_at	41	38.1	32.1	50.7	59	58.6	1.51349	0.597878	0.00720036	PHD finger protein 11D	Phf11d
43628	1459333_at	4.7	1.5	1.5	14.6	12.1	9.3	4.67532	2.22507	0.00720075
26039	1441733_s_at	132.9	140	125.3	155	157.5	153	1.16901	0.225288	0.00721508	nucleoporin 153	Nup153
13723	1429417_at	38.4	34.9	39.5	49.5	47.3	54.5	1.34131	0.423645	0.00723732	chondroitin sulfate synthase 3	Chsy3
21625	1437319_at	724.6	713.4	702.8	511.9	613.5	527.1	-1.29549	-0.3735	0.00725338	unc-13 homolog C (C. elegans)	Unc13c
8491	1424185_a_at	3986.8	4038.6	3948.1	3733.7	3826	3817.3	-1.05243	-0.0737247	0.00725453	mortality factor 4 like 1 pseudogene /// predicted gene 6747 /// mortality factor 4 like 1	A730098P11Rik /// Gm6747 /// Morf4l1
16191	1431885_a_at	97.7	106.2	99.3	65.7	73.7	82.1	-1.36885	-0.452963	0.00729168	MUS81 endonuclease homolog (yeast)	Mus81
38795	1454500_at	5.8	8	6.1	3.1	1.2	0.9	-3.82692	-1.93618	0.00733227	RIKEN cDNA 6330419E04 gene	6330419E04Rik
36145	1451850_at	4.3	5	6.5	2	1.9	1	-3.22449	-1.68907	0.00734489	prolactin receptor	Prlr
18288	1433982_at	172.1	173.6	168.2	139.8	139.6	154.8	-1.18356	-0.243128	0.0073484	ubiquitin specific peptidase 28	Usp28
12664	1428358_at	19	15.6	13.8	25.8	28.3	24	1.61364	0.690316	0.00735064	zymogen granule protein 16	Zg16
23613	1439307_at	76.4	74	75.9	95	86.8	86.9	1.18736	0.24776	0.0073673
5331	1421025_at	164.1	146.1	152.8	201	184.3	207	1.27927	0.355316	0.00738454	1-acylglycerol-3-phosphate O-acyltransferase 1 (lysophosphatidic acid acyltransferase, alpha)	Agpat1
16818	1432512_at	10.9	14.2	17.2	2.1	5.5	1.5	-4.64835	-2.21672	0.00738865	ATP/GTP binding protein-like 4	Agbl4
20830	1436524_at	28.1	25.2	21.7	12.2	10.5	3.5	-2.8626	-1.51732	0.00739918	RIKEN cDNA 4833438C02 gene	4833438C02Rik
16203	1431897_at	14.9	12.7	7.8	1.2	1.4	1.2	-9.31579	-3.21968	0.00740029	carbohydrate (N-acetylgalactosamine 4-0) sulfotransferase 9	Chst9
31421	1447115_at	8.6	4.2	14.7	26.8	29.4	23.6	2.90182	1.53696	0.00740807	solute carrier family 26, member 10	Slc26a10
14678	1430372_at	39.9	39	31.8	24.4	19.7	17.6	-1.79417	-0.843313	0.00741608	RIKEN cDNA D730045B01 gene	D730045B01Rik
18443	1434137_x_at	8.9	9.3	12.2	1.7	2.5	4.9	-3.34066	-1.74013	0.00741931	zymogen granule protein 16	Zg16
30200	1445894_at	48.1	43.9	35	23.5	22.2	17.9	-1.99686	-0.99773	0.00742607
14073	1429767_at	98.8	115.5	95.7	70.7	65.9	74.2	-1.47059	-0.556393	0.00744788	RIKEN cDNA 2810013P06 gene	2810013P06Rik
21013	1436707_x_at	93.9	87.6	105.3	49.6	47	67.2	-1.75092	-0.80811	0.00745959	non-SMC condensin I complex, subunit H	Ncaph
39271	1454976_at	403.8	414.3	441.3	364.8	340.2	355.2	-1.18789	-0.2484	0.00746278	superoxide dismutase 2, mitochondrial	Sod2
27755	1443449_at	25	18	20.2	4.2	8.8	9.8	-2.77193	-1.47089	0.00747291	uncharacterized LOC102632699	LOC102632699
9863	1425557_x_at	97.3	94.1	101.2	83.3	76.2	84.2	-1.20066	-0.263824	0.00747543	TSC22 domain family, member 3	Tsc22d3
33090	1448790_at	38.2	55.3	33.7	73.6	88.7	87.4	1.96305	0.973097	0.00747786	sema domain, transmembrane domain (TM), and cytoplasmic domain, (semaphorin) 6B	Sema6b
1832	1417501_at	122.6	155.1	141.5	186.3	185.7	193.6	1.34924	0.432143	0.00748922	F-box protein 6	Fbxo6
36136	1451841_a_at	59.9	59.8	60.8	84.8	75.5	92	1.39778	0.483141	0.00748982	nuclear receptor co-repressor 2	Ncor2
12074	1427768_s_at	1.4	1.2	1.4	1	1	1	-1.33333	-0.415037	0.00749043	myosin, light polypeptide 3	Myl3
30541	1446235_at	162.1	166.7	166.8	141.5	116.8	127.6	-1.28427	-0.360949	0.00749694	adaptor-related protein complex 1 associated regulatory protein	Ap1ar
41059	1456764_at	298.6	303	314.3	350.6	351.4	332	1.12894	0.174974	0.00749864	solute carrier family 35, member F3	Slc35f3
3402	1419071_at	4.2	4.8	3.8	1.9	2.8	2	-1.91045	-0.933911	0.00750468	cystin 1	Cys1
43107	1458812_at	27.8	33.7	33.9	21	19.9	22.5	-1.50473	-0.589506	0.00754874
3239	1418908_at	112.4	112.2	110.7	664.6	686	393.4	5.20131	2.37888	0.00756337	peptidylglycine alpha-amidating monooxygenase	Pam
31607	1447301_at	121.1	129.4	119.9	107	99.9	106.8	-1.18075	-0.239699	0.0075652	A kinase (PRKA) anchor protein 5	Akap5
18053	1433747_at	791.1	832	799.5	688.3	738	690.5	-1.14446	-0.194671	0.00757865	leucyl/cystinyl aminopeptidase	Lnpep
12700	1428394_at	58.8	98.8	70.9	144.8	131.8	154.6	1.88709	0.916163	0.0075822	leucine rich repeat containing 8A /// phytanoyl-CoA dioxygenase domain containing 1	Lrrc8a /// Phyhd1
32294	1447988_at	54.2	31.2	36.7	75.9	78.8	90.4	2.00737	1.00531	0.00758259
2730	1418399_at	87.3	91.9	103.8	71.5	64.7	61.9	-1.42857	-0.514573	0.00759684	potassium channel tetramerisation domain containing 9	Kctd9
31662	1447356_at	22.7	29.6	34	0.7	6	11.6	-4.71585	-2.23752	0.00759816	Mettl7a2-Higd1c readthrough transcript	Mettl7a2Higd1c
28237	1443931_at	24.5	16	20	44	43	33.9	1.99835	0.998807	0.00760274	zinc finger protein 882	Zfp882
41320	1457025_at	11.2	6.5	8.1	0.6	2.1	1.5	-6.14286	-2.61891	0.0076169	short chain dehydrogenase/reductase family 16C, member 6	Sdr16c6
19039	1434733_at	37.5	34.5	33.4	58.4	55.9	46.8	1.52846	0.612082	0.00762114	serine/threonine kinase 36	Stk36
21314	1437008_x_at	399.8	427	410.9	468	449.8	462.5	1.11521	0.15732	0.00763968	transmembrane protein 109	Tmem109
2352	1418021_at	188.3	167.9	176.8	207.6	225.9	225.6	1.23659	0.306362	0.00764204	complement component 4A (Rodgers blood group) /// complement component 4B (Chido blood group)	C4a /// C4b
18728	1434422_at	228.5	209.1	220.8	258.2	252	246.4	1.14915	0.200566	0.00766498	RIKEN cDNA 1700066M21 gene	1700066M21Rik
21148	1436842_at	536.4	514	515.4	484.5	470.5	460.1	-1.10649	-0.145996	0.00769122	family with sequence similarity 63, member B	Fam63b
20325	1436019_a_at	347.1	357.5	335.5	293.6	314.5	300.4	-1.14485	-0.195164	0.00771247	trafficking protein particle complex 1	Trappc1
26670	1442364_at	161	145	145.2	32.6	48.8	92.5	-2.59459	-1.37551	0.00773786	mitogen-activated protein kinase 14	Mapk14
31857	1447551_x_at	292.8	268.4	309	363.9	416.5	380	1.33349	0.415203	0.00774189
41746	1457451_at	9.8	12.2	12	25.2	19.8	19.3	1.89118	0.919284	0.00774687
41845	1457550_at	185.3	180.1	188.4	220.3	203	216.8	1.15583	0.208932	0.00775236	RIKEN cDNA 9530059O14 gene	9530059O14Rik
21760	1437454_a_at	1625.9	1758.4	1645.6	1389.1	1441.1	1477.6	-1.16763	-0.223578	0.0077533	thioredoxin-related transmembrane protein 2	Tmx2
45055	AFFX-DapX-M_at	13.3	16.7	14.6	6.9	9.3	5.1	-2.0939	-1.06619	0.00775718
4962	1420656_at	54.7	40.8	40.6	22	21.6	14.6	-2.33849	-1.22558	0.00777919	ATP-binding cassette, sub-family G (WHITE), member 8	Abcg8
21835	1437529_at	2	2	1.8	0.5	0.5	1.2	-2.63636	-1.39855	0.00778904	MAS-related GPR, member B1	Mrgprb1
29811	1445505_at	24.3	20.9	24.5	5	13.4	4.1	-3.09778	-1.63123	0.00780448	N-deacetylase/N-sulfotransferase (heparan glucosaminyl) 1	Ndst1
35164	1450869_at	192.7	171.5	189.9	149.3	148	133.8	-1.28532	-0.362124	0.00781146	fibroblast growth factor 1	Fgf1
12506	1428200_a_at	58.6	45.8	58.1	77.6	73.8	81.7	1.43446	0.520509	0.00783522	pyridoxal-dependent decarboxylase domain containing 1	Pdxdc1
10524	1426218_at	230	217.9	243	332.5	301	286.2	1.33116	0.412686	0.00784925	glucocorticoid induced transcript 1	Glcci1
634	1416303_at	277	260.5	252.7	228.9	213.9	223.2	-1.18649	-0.246696	0.00785335	LPS-induced TN factor	Litaf
41435	1457140_s_at	13.9	13.1	11.9	0.9	7	2.1	-3.89	-1.95977	0.00787533	Ras association (RalGDS/AF-6) domain family (N-terminal) member 10	Rassf10
20392	1436086_at	24.7	32.5	18.8	6	2.5	6.2	-5.17007	-2.37018	0.00787767	Leber congenital amaurosis 5-like	Lca5l
6122	1421816_at	157.1	155.1	150.4	179	177.5	195.3	1.19282	0.25438	0.00789457	glutathione reductase	Gsr
20387	1436081_a_at	300.5	322	309.5	275.4	261	276.9	-1.14595	-0.196542	0.00790289	zinc finger protein 414	Zfp414
24749	1440443_at	216	192.2	184.6	139.4	102.9	89.4	-1.78716	-0.837666	0.00790956	RIKEN cDNA E030016H06 gene	E030016H06Rik
29722	1445416_at	3.1	1.8	2.4	6.8	5.3	8	2.75342	1.46123	0.00791194	centrosomal protein 41	Cep41
14625	1430319_at	6.8	2.1	1.5	12.5	11.1	13.3	3.54808	1.82704	0.00791932	RIKEN cDNA 4833411C07 gene	4833411C07Rik
29706	1445400_at	27.8	27.3	24.2	35.2	43.7	41.5	1.51828	0.602443	0.00793268
25356	1441050_at	99.8	88.9	92.8	135	150.2	122.7	1.44902	0.535081	0.00794569
4249	1419930_at	18.4	15.8	17.5	3.3	10.3	6	-2.63776	-1.39931	0.00794658	DNA segment, Chr 15, ERATO Doi 55, expressed	D15Ertd55e
26753	1442447_at	74.1	83.4	74.1	2.5	39.2	1.6	-5.34873	-2.4192	0.00795275
285	1415954_at	0.6	0.6	1.6	4.8	6.8	4.1	5.60714	2.48727	0.00796066	trypsin 4 /// trypsin 5	Try4 /// Try5
22147	1437841_x_at	220	246.2	242.7	330.4	289.6	336.1	1.34871	0.431579	0.0079972	cold shock domain containing C2, RNA binding	Csdc2
18065	1433759_at	643.3	517.6	579.3	405.2	379.9	406.1	-1.46088	-0.546837	0.00800141	dpy-19-like 1 (C. elegans)	Dpy19l1
6392	1422086_at	17.1	11.8	11.1	2.1	4.8	2.8	-4.12371	-2.04394	0.00802259	T-box 19	Tbx19
15272	1430966_at	66	76.1	66	54.1	50.3	48.4	-1.36191	-0.445632	0.00803428	camello-like 3	Cml3
4634	1420328_at	51.2	40.5	47.5	24	24.2	31.7	-1.74218	-0.800892	0.00803632	RAB15 effector protein	Rep15
37406	1453111_a_at	152.6	141	136.9	117.6	107.8	118.9	-1.25036	-0.322347	0.00804066	solute carrier family 25, member 39	Slc25a39
34729	1450434_s_at	38	37.7	52.6	73.2	70.7	65	1.62822	0.703291	0.00804666	phosphate cytidylyltransferase 1, choline, alpha isoform	Pcyt1a
5087	1420781_at	1.6	1.1	3.5	13.9	18.3	25.7	9.33871	3.22322	0.00806511	ectopic ossification 1	Etos1
22515	1438209_at	45.8	45.1	50.9	34.5	23.5	23.4	-1.74201	-0.800757	0.00806606	RIKEN cDNA 4632404H12 gene	4632404H12Rik
10223	1425917_at	18.4	16.1	22.4	9.6	3.2	3.9	-3.40719	-1.76858	0.00807622	interferon-induced protein 44 like	Ifi44l
22129	1437823_at	3.5	2.1	3.5	14.2	10.8	18.8	4.81319	2.26699	0.00809218	predicted gene 12406 ///	Gm12406 /// Gm12406
21166	1436860_at	351.4	371.4	351.4	319.6	318.8	328.3	-1.1112	-0.152122	0.00810233	SUMO1/sentrin specific peptidase 7	Senp7
36726	1452431_s_at	16.6	17.8	19.4	1.7	2.3	9.8	-3.89855	-1.96294	0.00812726	histocompatibility 2, class II antigen A, alpha	H2-Aa
11119	1426813_at	261.8	255.8	259	213	230.9	200.3	-1.20553	-0.269663	0.00816004	LTV1 homolog (S. cerevisiae)	Ltv1
2333	1418002_at	1659.4	1615.9	1615.7	1495.3	1443.3	1529.3	-1.0947	-0.130533	0.00818345	HIG1 domain family, member 2A	Higd2a
26401	1442095_at	64	64.4	66.5	33.6	42.9	49.6	-1.5456	-0.628166	0.0081849	additional sex combs like 3 (Drosophila)	Asxl3
29788	1445482_at	34.1	43.5	36.8	10.4	20.6	5	-3.17778	-1.66802	0.0081855	GLE1 RNA export mediator (yeast)	Gle1
18273	1433967_at	15.1	9.3	8.9	0.9	0.7	1.9	-9.51429	-3.2501	0.00818755	BPI fold containing family B, member 9B	Bpifb9b
31802	1447496_s_at	50.8	62.5	61.7	80	86	95.7	1.49543	0.580559	0.00819771	fibronectin type 3 and ankyrin repeat domains 1	Fank1
13475	1429169_at	43.9	58.5	60.6	77.8	82.8	83.9	1.5	0.584963	0.00821329	predicted gene 15453 /// RNA binding motif protein 3	Gm15453 /// Rbm3
37217	1452922_at	70.1	60.4	59.9	79.6	84.4	79.9	1.28099	0.357256	0.00824317	protein phosphatase 1, regulatory subunit 3D	Ppp1r3d
7384	1423078_a_at	771.3	779.1	866.2	656.2	642.9	593.5	-1.27687	-0.352609	0.00824925	methylsterol monoxygenase 1	Msmo1
40307	1456012_x_at	694.4	704.8	712.1	600.1	503.4	576.7	-1.25658	-0.329499	0.00828797	ribonuclease T2A /// ribonuclease T2B	Rnaset2a /// Rnaset2b
6003	1421697_at	2.7	3.9	3.8	15.7	10.7	10.2	3.51923	1.81526	0.00828815	Usher syndrome 2A (autosomal recessive, mild)	Ush2a
6978	1422672_at	3	2	2.6	0.6	0.5	1.2	-3.30435	-1.72437	0.00828827	small proline-rich protein 1B	Sprr1b
40865	1456570_at	150.5	142.7	164.4	182.6	200.7	197.9	1.2701	0.344948	0.00828938	erythrocyte protein band 4.1-like 4b	Epb4.1l4b
44626	1460334_at	223.8	239.7	239.6	198.6	208.1	191	-1.17634	-0.234308	0.00831345	drebrin-like	Dbnl
15050	1430744_at	2.1	1.7	3.7	6.4	8.8	6.6	2.90667	1.53937	0.00831689	napsin A aspartic peptidase	Napsa
611	1416280_at	933.3	945.8	924.9	965.5	972.1	963.1	1.03449	0.0489147	0.00831881	ubiquitin-like modifier activating enzyme 2	Uba2
18718	1434412_x_at	404	403.7	423.6	491.1	453.6	490.3	1.16543	0.220868	0.00836451	STIP1 homology and U-Box containing protein 1	Stub1
11666	1427360_at	21.9	19.1	17.2	31.3	39.9	31.9	1.77148	0.824953	0.0083778	RIKEN cDNA 4930507D05 gene	4930507D05Rik
12381	1428075_at	1831	1870.1	1818.2	1689.3	1664.6	1746.5	-1.08213	-0.113875	0.00839431	predicted pseudogene 3244 /// predicted gene 3873 /// NADH dehydrogenase (ubiquinone) 1 beta subcomplex 4	Gm3244 /// Gm3873 /// Ndufb4
3307	1418976_s_at	72.4	49.6	58.3	28.3	28.8	25.9	-2.17229	-1.11922	0.00840873	cell death-inducing DNA fragmentation factor, alpha subunit-like effector B	Cideb
39089	1454794_at	350.8	373.1	374.5	408.7	409	400	1.10861	0.148755	0.00843162	spastin	Spast
37599	1453304_s_at	367.4	371.1	361.1	512.4	434.8	493.1	1.30984	0.389391	0.00845414	lymphocyte antigen 6 complex, locus E	Ly6e
10136	1425830_a_at	281.8	268.6	287.6	344.9	387.2	339.4	1.27864	0.35461	0.00845822	cyclin-dependent kinase 2 interacting protein	Cinp
12065	1427759_a_at	11	11.2	16.8	3.9	4.1	2.4	-3.75	-1.90689	0.00848157	ADP-ribosyltransferase 5	Art5
37037	1452742_at	165.2	163.7	151.1	206.7	190.1	188.8	1.22	0.286881	0.00848408	trafficking protein, kinesin binding 1	Trak1
9430	1425124_at	8.4	11.6	10.1	20.2	22	29	2.36545	1.24211	0.00848621	ring finger protein 183	Rnf183
35062	1450767_at	25	32.3	32.4	46.6	41.4	43.4	1.46488	0.550785	0.00848758	neural precursor cell expressed, developmentally down-regulated gene 9	Nedd9
36339	1452044_at	1081.8	1123.1	1061.3	1185	1185.3	1226.7	1.10128	0.139181	0.00848778	actin related protein 2/3 complex, subunit 5-like	Arpc5l
13721	1429415_at	136.8	148.3	136.3	158.9	170.2	168.4	1.18059	0.239506	0.00849707	zinc finger, MYND-type containing 8	Zmynd8
7465	1423159_at	571.7	555.8	544.1	462.6	465	506.7	-1.16545	-0.220883	0.00850228	dihydrolipoamide dehydrogenase	Dld
2576	1418245_a_at	402.1	414.1	469.2	334.9	318.1	325.5	-1.31364	-0.393574	0.00852207	RNA binding protein, fox-1 homolog (C. elegans) 2	Rbfox2
12750	1428444_at	54	56.7	50.8	37.8	27.8	39	-1.54398	-0.626651	0.00855011	ankyrin repeat and SOCS box-containing 2	Asb2
37574	1453279_x_at	6.5	4.7	8.3	1.9	0.9	1	-5.13158	-2.3594	0.00855156	keratin 76	Krt76
2050	1417719_at	101.2	107.9	106.7	119.5	132.6	125.9	1.19696	0.259375	0.00856724	sin3 associated polypeptide	Sap30
30276	1445970_at	25.8	19.7	26.1	11.4	3.5	10.2	-2.85259	-1.51227	0.0085921	expressed sequence AU022526	AU022526
41704	1457409_at	395.3	373.6	368.5	439.6	461.5	426.2	1.16696	0.222755	0.00859989	fucosyltransferase 9	Fut9
31789	1447483_s_at	29.3	27.1	24	35.3	42.4	40.7	1.47264	0.558402	0.00860623
36672	1452377_at	242.4	240	261.4	285.2	313.7	314.4	1.22788	0.296174	0.00862481	lysine (K)-specific methyltransferase 2A	Kmt2a
9411	1425105_at	21.5	30	30.5	12.9	3.5	3	-4.2268	-2.07957	0.00864592	retinol binding protein 3, interstitial	Rbp3
25106	1440800_at	49.3	51.7	43.5	34.9	28.2	34.5	-1.48053	-0.566116	0.00868322
39247	1454952_s_at	218.4	219.2	224.1	244	236.6	233.3	1.07889	0.109545	0.00869616	non-SMC condensin II complex, subunit D3	Ncapd3
20537	1436231_at	486.7	523.6	538	648.3	629.9	592.5	1.20823	0.272893	0.00869673	RIKEN cDNA 2900052N01 gene	2900052N01Rik
33988	1449689_at	7.9	14.1	13.8	1.8	2.9	1.3	-5.96667	-2.57693	0.00870191	expressed sequence C81600	C81600
12529	1428223_at	183.4	163.1	147.2	212.7	237.9	226.1	1.37067	0.454882	0.00876386	major facilitator superfamily domain containing 2A	Mfsd2a
7468	1423162_s_at	271.1	241.3	225.3	372.1	354.6	316.2	1.41372	0.499495	0.00876389	sprouty protein with EVH-1 domain 1, related sequence	Spred1
8866	1424560_at	21.5	24.5	19.6	13.3	13.4	8.7	-1.85311	-0.889946	0.00878438	proline-serine-threonine phosphatase-interacting protein 1	Pstpip1
6884	1422578_at	1389.3	1253.1	1296.1	1090.7	1089.4	1138.1	-1.18694	-0.247245	0.00878711	citrate synthase	Cs
9093	1424787_a_at	44.7	37	44.7	65.8	56.8	58.2	1.43038	0.516398	0.00879077	nuclear respiratory factor 1	Nrf1
42442	1458147_at	58.6	60.6	69.3	118.3	92	122.3	1.76446	0.819224	0.00879534
35684	1451389_at	15.4	8.3	26.6	45.6	40.4	43.6	2.57654	1.36544	0.00881928	DnaJ (Hsp40) homolog, subfamily C, member 24	Dnajc24
25458	1441152_at	39.4	25.8	28.5	50.9	50.4	53.1	1.64781	0.720552	0.00881956
44354	1460061_at	95.9	112.7	110.8	139.2	143.1	161.5	1.38948	0.474545	0.00882442
32631	1448331_at	779.8	806.8	774.4	731.5	710.6	687.6	-1.10861	-0.148748	0.00883439	NADH dehydrogenase (ubiquinone) 1 beta subcomplex, 7	Ndufb7
28291	1443985_at	68.6	62.7	49.9	20.9	35.2	21.2	-2.34411	-1.22904	0.00884026	zinc finger protein 719	Zfp719
30141	1445835_at	29.3	32.9	22.3	13.1	10.9	5.5	-2.86441	-1.51824	0.00885054
28519	1444213_at	27.5	31.9	34.9	18	19.2	22	-1.59291	-0.671661	0.00885511	RIKEN cDNA 1700012D14 gene	1700012D14Rik
10406	1426100_a_at	203.3	206.3	205	182.5	171.7	157.9	-1.20016	-0.263222	0.00887881	thymidine kinase 2, mitochondrial	Tk2
21195	1436889_at	2360.2	2198.2	2375.6	2042.7	1988.8	1901.8	-1.16866	-0.224853	0.0088849	gamma-aminobutyric acid (GABA) A receptor, subunit alpha 1	Gabra1
892	1416561_at	6417.2	6340.3	6611.2	5952.4	6104.7	5977.8	-1.07396	-0.102936	0.00888985	glutamate decarboxylase 1	Gad1
5519	1421213_at	29.2	27.7	30.5	3.8	14.5	15.2	-2.60896	-1.38347	0.00892192	EDAR (ectodysplasin-A receptor)-associated death domain	Edaradd
35731	1451436_at	261	280.9	291.7	326.4	322.9	317.6	1.15991	0.214011	0.0089494	sno, strawberry notch homolog 1 (Drosophila)	Sbno1
1281	1416950_at	67	64.9	69.4	80.5	91.4	81.8	1.26031	0.333776	0.00895085	tumor necrosis factor, alpha-induced protein 8	Tnfaip8
20339	1436033_at	429.2	444	413.4	380.1	390.4	382.6	-1.11577	-0.158046	0.00895512	family with sequence similarity 214, member A	Fam214a
10881	1426575_at	111.8	103.5	103.7	139.9	133.2	123.6	1.24357	0.314492	0.00903303	sphingomyelin synthase 1	Sgms1
21560	1437254_at	46.9	44.1	45.2	39.2	41.2	37.9	-1.15131	-0.203277	0.00903611	centrosomal protein 76	Cep76
9446	1425140_at	170.8	161.3	148.2	100.6	124	118.6	-1.39948	-0.484886	0.00903851	lactamase, beta 2	Lactb2
27989	1443683_at	11.8	18.6	7.5	39.3	35.5	53.5	3.38522	1.75925	0.00904931
23328	1439022_at	848.9	904.3	787.1	1130.1	1013	1077.6	1.26784	0.342375	0.0090587	phosphatase and actin regulator 1	Phactr1
32040	1447734_x_at	792.5	787.9	794	730.3	676.1	723.8	-1.11464	-0.156574	0.00905917	aldolase A, fructose-bisphosphate	Aldoa
7946	1423640_at	1712.5	1841.9	1898.1	1541	1495.3	1572.7	-1.18301	-0.242464	0.00906196	synaptoporin	Synpr
26348	1442042_at	46.8	38.1	49.4	28.8	29.1	26.8	-1.5856	-0.665025	0.00907497	predicted gene, 20324	Gm20324
18796	1434490_at	5.8	1.5	1.6	9.2	11.6	10.5	3.51685	1.81429	0.00908487	scavenger receptor class F, member 1	Scarf1
22947	1438641_x_at	438.1	442.2	458.7	384	362	402.9	-1.16546	-0.220903	0.00908896	family with sequence similarity 57, member B	Fam57b
41642	1457347_at	117.2	126.2	121.3	96.5	75.4	68.9	-1.51453	-0.598875	0.00908946	ryanodine receptor 1, skeletal muscle	Ryr1
33616	1449316_at	92.6	69.7	86	117.9	126.2	113.8	1.4414	0.527472	0.00909383	cytochrome P450, family 4, subfamily f, polypeptide 15	Cyp4f15
27296	1442990_at	20.5	15.3	24.6	2.7	7.2	7	-3.57396	-1.83753	0.00910075
31902	1447596_at	12.5	16.1	17	7.9	6.1	8.9	-1.99127	-0.993686	0.00911659
9156	1424850_at	69.3	67.4	83.3	38.2	49.9	34.1	-1.80033	-0.848259	0.00911751	mitogen-activated protein kinase kinase kinase 1	Map3k1
19815	1435509_x_at	903.8	792.4	842.1	1166.3	1046	1049.4	1.28499	0.361762	0.00912302	CDK2 (cyclin-dependent kinase 2)-associated protein 1	Cdk2ap1
19196	1434890_at	1666	1729.4	1674.2	1591.8	1533.6	1517.5	-1.0919	-0.126846	0.0091281	optic atrophy 1	Opa1
19218	1434912_at	53.9	56.3	58.4	35.1	44.7	43	-1.37296	-0.457294	0.00913494	resistance to inhibitors of cholinesterase 3 homolog (C. elegans)	Ric3
39627	1455332_x_at	45.1	39.4	42.3	34.8	30.4	32	-1.30453	-0.383527	0.00913996	Fc receptor, IgG, low affinity IIb	Fcgr2b
3293	1418962_at	164	166.5	189	134.5	121.4	134.8	-1.32966	-0.411062	0.00916595	NECAP endocytosis associated 2	Necap2
21355	1437049_at	42.3	47.3	45.5	35.4	33	37.9	-1.27093	-0.345886	0.00917989
18063	1433757_a_at	292.5	336	347.6	194.5	223.4	244.6	-1.47336	-0.559109	0.00922374	nischarin	Nisch
1166	1416835_s_at	1046.6	1039.1	1051.1	1112.7	1156.4	1103.5	1.07517	0.104568	0.00924127	S-adenosylmethionine decarboxylase 1	Amd1
28393	1444087_at	52.3	49.8	55.4	60.8	62.9	59.9	1.16571	0.221214	0.00924644	PRP38 pre-mRNA processing factor 38 (yeast) domain containing A	Prpf38a
8101	1423795_at	612.8	475.3	490.1	769.3	743.1	716.9	1.41256	0.498311	0.00927337	splicing factor proline/glutamine rich (polypyrimidine tract binding protein associated)	Sfpq
37143	1452848_at	1046.8	1266.2	1148.4	859.7	692.6	784.5	-1.48126	-0.566821	0.00928748	transmembrane protein 181A	Tmem181a
27379	1443073_at	45	45.1	55.1	27.3	28.1	34	-1.62416	-0.699695	0.0093346	predicted gene 12992	Gm12992
37301	1453006_at	72.6	78.7	86.9	61.6	53.6	55.7	-1.3938	-0.479021	0.00939097	fibroblast growth factor binding protein 3	Fgfbp3
12763	1428457_at	292.5	293.4	285.3	229.1	259.6	225.1	-1.22051	-0.287484	0.00939305	tocopherol (alpha) transfer protein-like	Ttpal
14544	1430238_at	6.1	9.9	5.5	16.7	17.4	13.4	2.2093	1.14359	0.00939757	glutamic-oxaloacetic transaminase 1-like 1	Got1l1
75	1415744_at	639.2	550.7	569.4	743.6	737	824.2	1.31007	0.38964	0.00946306	prefoldin subunit 6	Pfdn6
28909	1444603_at	3.3	2.6	2.4	7.4	12.4	9.3	3.50602	1.80984	0.00947013	RIKEN cDNA 2810030D12 gene	2810030D12Rik
12862	1428556_at	141	152.8	200.4	78.5	83.9	63.9	-2.18383	-1.12686	0.00950304	Pigy upstream reading frame	Pyurf
32537	1448237_x_at	3109.5	3153.7	3006	2877.8	2766.9	2715.6	-1.10872	-0.14889	0.00951013	lactate dehydrogenase B	Ldhb
19382	1435076_at	45.1	51.7	50.1	87.9	84.3	67.4	1.63104	0.705794	0.00955799	family with sequence similarity 57, member A	Fam57a
1604	1417273_at	140.6	184.9	148.2	67.2	71.9	98.8	-1.99117	-0.993618	0.00955866	pyruvate dehydrogenase kinase, isoenzyme 4	Pdk4
22808	1438502_x_at	44.8	48.5	39.6	32.3	31.9	32.5	-1.37435	-0.458753	0.00956317	ribosomal protein S17	Rps17
16131	1431825_at	51.7	46.8	58.6	30.2	37.5	29.3	-1.61959	-0.695627	0.00956626	serine/arginine-rich protein specific kinase 3	Srpk3
9216	1424910_at	24.4	29	30.7	17.9	14.5	19.1	-1.63301	-0.707533	0.00959299	kinesin family member 12	Kif12
32866	1448566_at	76.6	88.2	90.4	65.6	62.7	65.6	-1.31614	-0.396316	0.00961742	solute carrier family 40 (iron-regulated transporter), member 1	Slc40a1
3589	1419258_at	733.6	720.2	715.9	774.6	808.5	770.5	1.08476	0.117374	0.00962503	transcription elongation factor A (SII) 1	Tcea1
23329	1439023_at	58	54.5	45.8	36.8	27.4	27.9	-1.71878	-0.781388	0.00963002	DEAD (Asp-Glu-Ala-Asp) box polypeptide 55	Ddx55
18784	1434478_at	309	300.2	281.7	359.2	370.3	337.3	1.19744	0.259954	0.0096315	headcase homolog (Drosophila)	Heca
14936	1430630_at	35.6	32	39.9	11.6	6.2	21.1	-2.7635	-1.46649	0.00966132	putative uncharacterized protein ENSP00000383309-like	LOC102637403
14250	1429944_at	21.2	16.8	22.9	1.4	4	10.4	-3.85443	-1.94652	0.00966518	trichohyalin-like 1	Tchhl1
15091	1430785_at	27	21.7	24.6	6.4	13.6	2.2	-3.3018	-1.72325	0.00967348	4short chain dehydrogenase/reductase family 9C, member 7	Sdr9c7
1068	1416737_at	64.3	52.8	58.1	32.1	8.3	3.7	-3.97279	-1.99015	0.00969514	glycogen synthase 1, muscle	Gys1
12595	1428289_at	2129.4	2057.2	1860.8	2431.4	2399.9	2583.5	1.22611	0.294093	0.00974113	Kruppel-like factor 9	Klf9
37364	1453069_at	94.3	87.5	91.1	73.7	76	63.6	-1.27942	-0.355488	0.0097607	phosphatidylinositol 3-kinase, catalytic, beta polypeptide	Pik3cb
35893	1451598_at	1.9	1.3	3.6	6.2	5.4	7.2	2.76471	1.46713	0.00978849	paired box 4	Pax4
6975	1422669_at	410.3	406.8	440.5	356.7	372.8	347.6	-1.16758	-0.223521	0.00979265	estrogen receptor-binding fragment-associated gene 9	Ebag9
28078	1443772_at	83.9	81.6	79.8	145.9	122.8	171.1	1.79291	0.8423	0.00979481	DAZ interacting protein 1	Dzip1
22046	1437740_at	113.8	114.7	136.8	87.1	77.7	87.2	-1.4496	-0.535658	0.00979578	pleckstrin homology domain containing, family M (with RUN domain) member 2	Plekhm2
15298	1430992_s_at	61	69.6	67.7	54.9	52.6	53.4	-1.23244	-0.30152	0.00982546	CDGSH iron sulfur domain 2	Cisd2
33981	1449682_s_at	361.7	376.7	380.8	309	339.8	311.5	-1.16547	-0.220911	0.00985584	tubulin, beta 2a, pseudogene 2 /// tubulin, beta 2B class IIB	Tubb2a-ps2 /// Tubb2b
1978	1417647_at	294.1	307.2	313.4	379.6	345.3	353.5	1.17897	0.237522	0.0098572	sorting nexin 5	Snx5
17314	1433008_at	1.5	1.3	8.6	16.8	14.1	15.5	4.07018	2.02509	0.00986554	RIKEN cDNA 6330526H18 gene	6330526H18Rik
24366	1440060_at	51.1	35	43	23.4	13.7	15.6	-2.44972	-1.29261	0.00989454	predicted pseudogene 5126	Gm5126
3217	1418886_s_at	2226.8	2270.3	2074.9	1883.4	1932.1	1819.2	-1.16634	-0.221994	0.00989509	isocitrate dehydrogenase 3 (NAD+) beta	Idh3b
33320	1449020_at	84.9	93.4	80.4	65.9	70.3	66.3	-1.27753	-0.353358	0.00994313	phospholipid scramblase 3	Plscr3
36682	1452387_a_at	94.2	100	103.7	113	124.5	121.9	1.20645	0.270762	0.0099488	angiomotin-like 2	Amotl2
21257	1436951_x_at	602.8	572.7	573.5	636	666.2	638.4	1.10955	0.149972	0.0099607	thioredoxin domain containing 9	Txndc9
43123	1458828_at	34.5	34	28.3	16.4	19.7	22.9	-1.64068	-0.714292	0.00996775	vesicular, overexpressed in cancer, prosurvival protein 1	Vopp1
9437	1425131_at	306.9	288.4	305.9	250.2	247.3	211.1	-1.2718	-0.346876	0.0099865	protein tyrosine phosphatase, non-receptor type 5	Ptpn5
20168	1435862_at	620.8	608.2	751.5	853.6	931.5	952.3	1.38218	0.466942	0.00998911	Son DNA binding protein	Son
43868	1459573_at	61.7	73.5	66.9	48.5	53.2	48.5	-1.34554	-0.428185	0.00999169	ribosome production factor 1 homolog (S. cerevisiae)	Rpf1
1795	1417464_at	2.5	4	1.8	7.7	6	8.7	2.6988	1.43232	0.0100021	troponin C2, fast	Tnnc2
22787	1438481_at	54	50	40.8	27.2	29	31.7	-1.64733	-0.720127	0.0100109	PRP4 pre-mRNA processing factor 4 homolog (yeast)	Prpf4
38454	1454159_a_at	77.4	72.6	66.1	49.4	50.1	35	-1.60669	-0.684093	0.0100167	insulin-like growth factor binding protein 2	Igfbp2
28707	1444401_at	31.3	38.1	36.5	18.9	2.5	1.4	-4.64474	-2.2156	0.0100191
8971	1424665_at	117.3	100.2	117.2	155.1	189.1	158.7	1.50254	0.587403	0.0100342	G patch domain containing 8	Gpatch8
32862	1448562_at	40.5	34.6	46.7	24.3	25	24.2	-1.65714	-0.728698	0.0100546	uridine phosphorylase 1	Upp1
25434	1441128_at	46.2	43.7	48.3	71.3	60.2	60.4	1.38857	0.473597	0.0101152	RIKEN cDNA 2900016J10 gene	2900016J10Rik
35054	1450759_at	60.1	66.5	62.5	53.1	55.3	52.5	-1.17526	-0.232985	0.010169	bone morphogenetic protein 6	Bmp6
5900	1421594_a_at	313.2	296	243.7	189.9	183.1	190.8	-1.51277	-0.597193	0.010181	synaptotagmin-like 2	Sytl2
33048	1448748_at	107.4	115.6	106	126	127.2	136.2	1.18359	0.243165	0.0101837	pleckstrin	Plek
4349	1420030_at	2.4	3.1	3.7	1.2	0.7	1.4	-2.78788	-1.47917	0.0101889	SLU7 splicing factor homolog (S. cerevisiae)	Slu7
12764	1428458_at	46.8	37	41	27.1	23.5	29.1	-1.56587	-0.646966	0.0101895	processing of precursor 1, ribonuclease P/MRP family, (S. cerevisiae)	Pop1
6261	1421955_a_at	760.1	822.9	760.8	1202.2	1092.3	979	1.39666	0.481985	0.0102098	neural precursor cell expressed, developmentally down-regulated 4	Nedd4
486	1416155_at	488.6	551.2	580.5	381.9	417.6	415.9	-1.33314	-0.41483	0.0102116	high mobility group box 3	Hmgb3
7400	1423094_at	456.6	484.2	494.7	526	550.5	547	1.13096	0.177554	0.0102213	cereblon	Crbn
27236	1442930_at	26.6	15.2	19.6	5.9	5.2	2.3	-4.58209	-2.19601	0.010224	expressed sequence AW061147	AW061147
20446	1436140_at	74	66.5	61.2	51.1	44	48.3	-1.40656	-0.492166	0.0102298	DENN/MADD domain containing 6B	Dennd6b
8723	1424417_at	61.1	71.1	79.5	34.5	44.5	45.4	-1.70177	-0.767035	0.0102341	vacuolar protein sorting 36 (yeast)	Vps36
9055	1424749_at	86.7	116.4	45.9	230.3	202.9	174	2.43855	1.28603	0.0102399	WD repeat and FYVE domain containing 1	Wdfy1
37571	1453276_at	24.1	22.3	15.6	9.9	7.5	7.4	-2.5	-1.32193	0.0102446	kinesin family member 13B	Kif13b
8500	1424194_at	75.8	72.1	68.4	88.6	86.6	81.7	1.1877	0.248173	0.0102505	RCSD domain containing 1	Rcsd1
14162	1429856_at	17.2	14.6	8.9	1.6	2.6	2.6	-5.98529	-2.58142	0.010275	tetraspanin 18	Tspan18
22999	1438693_at	116.6	124.9	116.3	93.2	76.9	96.4	-1.34259	-0.425018	0.0102801	transmembrane protein 110	Tmem110
27285	1442979_at	15.8	11.2	9.4	1.4	4.3	1.1	-5.35294	-2.42033	0.0103024
8415	1424109_a_at	1231.6	1120.4	857.1	589.1	540.1	545.6	-1.91611	-0.93818	0.0103264	glyoxalase 1	Glo1
2294	1417963_at	295.2	249.6	253.1	355.3	360.3	416.2	1.41847	0.504339	0.0103375	phospholipid transfer protein	Pltp
26600	1442294_at	2.4	8.4	1.5	20.9	14.5	16.3	4.20325	2.07151	0.010395	RIKEN cDNA A530053G22 gene	A530053G22Rik
9734	1425428_at	35.3	52.9	65.6	105.3	87.6	101.9	1.91678	0.938681	0.0103974	hypoxia inducible factor 3, alpha subunit	Hif3a
13857	1429551_at	23.3	21.5	30.7	1.3	1.6	11.8	-5.13605	-2.36066	0.0104126	nuclear protein transcriptional regulator 1 like	Nupr1l
19164	1434858_x_at	48.1	54.8	55.9	73.2	66.2	78.6	1.3728	0.457117	0.0104329	zinc finger protein 511	Zfp511
43904	1459609_at	16.8	27.4	20.3	36.5	35.1	40.2	1.73333	0.793549	0.0104629
37768	1453473_a_at	403.5	410.9	462.5	306.9	347.9	320.4	-1.30937	-0.388876	0.0104676	dynein light chain Tctex-type 1A /// dynein light chain Tctex-type 1B /// dynein light chain Tctex-type 1C /// dynein light chain Tctex-type 1F	Dynlt1a /// Dynlt1b /// Dynlt1c /// Dynlt1f
43454	1459159_a_at	43.8	44.4	42.6	29.9	17.9	29.3	-1.6965	-0.76256	0.0104678	coiled-coil domain containing 6	Ccdc6
37548	1453253_a_at	277.3	278.4	243.1	215.6	203.4	213.7	-1.26253	-0.336313	0.0104864	RNA pseudouridylate synthase domain containing 1	Rpusd1
32166	1447860_x_at	68.5	51.7	46.1	10.3	17	26.7	-3.07963	-1.62276	0.0104911	component of oligomeric golgi complex 8	Cog8
1311	1416980_at	1.6	1.2	1.1	4.5	3.6	2.8	2.79487	1.48278	0.0105177	methyltransferase like 7B	Mettl7b
44486	1460193_at	372	318.2	334.8	416.8	418.3	409.5	1.21424	0.280058	0.0105262	suppression of tumorigenicity 13	St13
6553	1422247_a_at	23.1	17.9	18.1	10.2	10.1	4.6	-2.37349	-1.24701	0.0105301	ubiquitously transcribed tetratricopeptide repeat gene, Y chromosome	Uty
11303	1426997_at	226.3	221.1	228.8	214.8	209.3	206.3	-1.07265	-0.101182	0.0105453	thyroid hormone receptor alpha	Thra
39697	1455402_at	882.2	960.1	853.5	1039.7	1042.7	1078.4	1.17249	0.229576	0.0105455	suppressor of cytokine signaling 7	Socs7
29906	1445600_at	145.2	122.1	107.6	64.6	74.5	77.7	-1.72924	-0.790141	0.0105876
37053	1452758_s_at	3621.7	3635.6	3786.1	3919.4	3959.5	4049.1	1.0801	0.111168	0.0105926	eukaryotic translation initiation factor 4, gamma 2	Eif4g2
6273	1421967_at	9.8	7.4	9.3	16.8	14.6	20.5	1.95849	0.969742	0.0106011	UDP-Gal:betaGlcNAc beta 1,4-galactosyltransferase, polypeptide 5	B4galt5
11946	1427640_a_at	141.2	153.6	180.2	206.9	213.5	213.5	1.33453	0.416328	0.0106413	runt-related transcription factor 1; translocated to, 1 (cyclin D-related)	Runx1t1
28601	1444295_at	29.5	33.3	34.2	39.3	41.8	44.7	1.29691	0.375075	0.01065	neogenin	Neo1
35399	1451104_a_at	585.4	617.2	547.1	403.7	453.4	481	-1.3076	-0.386922	0.0106747	small nuclear ribonucleoprotein 70 (U1)	Snrnp70
19611	1435305_at	608.7	602	555.7	712.2	661.3	698.6	1.17306	0.230282	0.010691	neurotrophic tyrosine kinase, receptor, type 2	Ntrk2
353	1416022_at	1170.7	1142.8	1273.8	1025.5	968.2	1007.7	-1.19521	-0.257263	0.0107266	fatty acid binding protein 5, epidermal	Fabp5
2048	1417717_a_at	19.1	16.2	15.5	12.3	9.6	9.5	-1.61783	-0.694064	0.0107367	tyrosinase	Tyr
34955	1450660_at	228.2	237.5	219	192.5	175.8	198.8	-1.20737	-0.271869	0.0107552	6-pyruvoyl-tetrahydropterin synthase	Pts
28052	1443746_x_at	31.8	23.9	35	15.3	13.1	16.1	-2.0382	-1.0273	0.0107811	dentin matrix protein 1	Dmp1
37804	1453509_at	6.7	12.2	10.9	1.7	1.7	3.1	-4.58462	-2.1968	0.0107813	Ly6/Plaur domain containing 2	Lypd2
8029	1423723_s_at	505.9	449.8	481	546.8	580.7	588.5	1.1944	0.256291	0.0107864	TAR DNA binding protein	Tardbp
1425	1417094_at	2066.5	1733.4	1717.5	1340.6	1287.5	1335.2	-1.39212	-0.477286	0.0107907	acyl-CoA thioesterase 7	Acot7
9073	1424767_at	155.4	177.6	167.2	197.4	193.4	198.6	1.17833	0.236742	0.010796	cadherin 22	Cdh22
40138	1455843_at	2.9	1.6	0.9	13.8	7.4	10.4	5.85185	2.54889	0.010796	fucosyltransferase 4	Fut4
8887	1424581_at	99	104.2	121.4	76.7	67.7	78.4	-1.45691	-0.542914	0.0108133	SH3 and cysteine rich domain 2	Stac2
17135	1432829_at	21	17.6	28.6	9	3.6	1.7	-4.6993	-2.23245	0.0108221	enolase 1, alpha non-neuron /// enolase 1B, retrotransposed	Eno1 /// Eno1b
41043	1456748_a_at	301.6	324.7	316	222	265.8	211	-1.34845	-0.431307	0.0108325	4-nitrophenylphosphatase domain and non-neuronal SNAP25-like protein homolog 1 (C. elegans)	Nipsnap1
13282	1428976_at	30.7	34.7	31.3	46.3	39.2	44.3	1.3423	0.424703	0.0108452	thymopoietin	Tmpo
12446	1428140_at	1316.2	1396.2	1262.8	1068.8	1163	1101.5	-1.19257	-0.254076	0.010858	3-oxoacid CoA transferase 1	Oxct1
13550	1429244_at	121.3	126.9	125.2	109.4	111.2	99.7	-1.16578	-0.221298	0.0108601	RIKEN cDNA 2610524H06 gene	2610524H06Rik
28564	1444258_at	67.2	70.4	69	52.9	37.3	32.5	-1.68378	-0.751705	0.0108969
35240	1450945_at	76.8	66.9	77.4	91.4	105.9	108.2	1.38173	0.466473	0.0108984	protein kinase C, alpha	Prkca
668	1416337_at	1119.6	1066	1139.6	1006.8	1015.5	988.9	-1.10428	-0.143103	0.0109294	ubiquinol-cytochrome c reductase binding protein	Uqcrb
22065	1437759_at	84.6	89.2	97	108.8	124.4	115.5	1.28767	0.364759	0.0109432	phosphofructokinase, platelet	Pfkp
30491	1446185_at	20.2	27.1	15	5.4	5.4	2.1	-4.82946	-2.27186	0.0109634	mechanistic target of rapamycin (serine/threonine kinase)	Mtor
16871	1432565_at	9.6	15.9	12.7	1.7	1.2	5.3	-4.65854	-2.21988	0.0109636	predicted gene 15247	Gm15247
32476	1448176_a_at	2061.8	2024.5	2013.6	2183.7	2185.9	2111.8	1.06254	0.0875199	0.0109839	heterogeneous nuclear ribonucleoprotein K	Hnrnpk
43810	1459515_at	22	20.9	12.9	7	1.5	1.3	-5.69388	-2.50941	0.0109847
19030	1434724_at	363.5	338.5	323.1	292.8	280.7	286.6	-1.19184	-0.253188	0.010997	ubiquitin specific peptidase 31	Usp31
3101	1418770_at	2.1	3.2	3.5	13.5	12.8	7.7	3.86364	1.94996	0.0110254	CD2 antigen	Cd2
5155	1420849_at	74.9	88	93.3	57.8	62.8	59.6	-1.42175	-0.507671	0.0110282	Crn, crooked neck-like 1 (Drosophila)	Crnkl1
19845	1435539_at	141.6	173.9	173.5	214.6	235	212.4	1.35378	0.436997	0.011056	huntingtin	Htt
26241	1441935_at	13.9	10.1	6.7	24.5	20.8	19.6	2.11401	1.07998	0.0110591	ankyrin repeat, family A (RFXANK-like), 2	Ankra2
42960	1458665_at	5.6	2.6	3.3	17.3	11.5	20.7	4.30435	2.10579	0.0110855
39577	1455282_x_at	62.4	57.1	65.4	73.8	73.8	80	1.23094	0.299755	0.0111119	aminolevulinic acid synthase 1	Alas1
31968	1447662_x_at	1.9	6	2.5	10.5	17.1	13.5	3.95192	1.98255	0.0111962	low density lipoprotein receptor class A domain containing 4	Ldlrad4
31221	1446915_at	46.6	52.2	54.7	23.2	33.4	13.4	-2.19286	-1.13281	0.0112226	DNA segment, Chr 7, ERATO Doi 316, expressed	D7Ertd316e
23722	1439416_x_at	12.3	10.6	14.6	59	40.5	35.3	3.59467	1.84586	0.0112263	tubulin, beta 4B class IVB	Tubb4b
40456	1456161_at	48.5	41.6	43.3	35.6	33.3	30.5	-1.34205	-0.424441	0.0112347	RIKEN cDNA 0610040B10 gene	0610040B10Rik
4947	1420641_a_at	93.2	93.6	106	76.1	77.6	66.6	-1.3291	-0.410446	0.011261	sulfide quinone reductase-like (yeast)	Sqrdl
11859	1427553_at	30.3	25.4	27.7	13.1	16	4.5	-2.48214	-1.31159	0.0112623	predicted gene 16489	Gm16489
29944	1445638_at	25.3	14.3	19.5	58.1	38.4	49.8	2.47547	1.3077	0.0112631
19830	1435524_at	864.7	892.7	839.6	755.6	678.4	758.2	-1.18465	-0.244467	0.0112684	small nucleolar RNA host gene 8	Snhg8
5742	1421436_at	92	89.5	93.5	102.4	98.5	105.6	1.11455	0.156455	0.0112748	glutamate receptor, ionotropic, delta 2	Grid2
14008	1429702_at	391	412.4	357.5	507.1	538.2	466.1	1.30192	0.380642	0.0112986	RIKEN cDNA 2900072G11 gene	2900072G11Rik
26103	1441797_at	32.6	24.5	18.7	85.2	151.5	105.7	4.51715	2.17541	0.0113211
23249	1438943_x_at	1200.1	1174.8	1193.4	1264.4	1281.8	1339.1	1.08884	0.122789	0.0113381	ribophorin I	Rpn1
18740	1434434_s_at	633.4	643.9	638.9	580.3	611.1	598.9	-1.07032	-0.0980468	0.011344	transcription elongation regulator 1 (CA150)	Tcerg1
44515	1460222_at	57	56.7	60.1	64.6	66.6	62.9	1.1168	0.159372	0.011349	SH3-domain binding protein 1	Sh3bp1
42788	1458493_a_at	45.6	47.2	53.5	33.6	26.6	18	-1.87084	-0.903689	0.0113539	RIKEN cDNA 2410089E03 gene	2410089E03Rik
35312	1451017_at	353.4	353.5	341.9	371.7	367.4	379.6	1.06665	0.0930836	0.0113678	ERGIC and golgi 3	Ergic3
25500	1441194_at	18.1	18.9	22.5	13.2	8.5	11.9	-1.77083	-0.824428	0.0114039	predicted gene, 19521	Gm19521
6255	1421949_a_at	54.1	69.1	64.2	41.2	41.2	44.5	-1.47675	-0.562429	0.0114104	centrosomal protein 89	Cep89
23834	1439528_at	9.6	16.1	15.6	4.7	4.6	2.2	-3.5913	-1.84451	0.011426	RIKEN cDNA 4833423E24 gene	4833423E24Rik
42835	1458540_at	33.5	42.7	30	20	17.4	15.1	-2.02286	-1.01639	0.011446
26137	1441831_x_at	45.7	28.8	34.4	14.9	14.2	13.6	-2.55035	-1.3507	0.0114475	chloride channel 5	Clcn5
12976	1428670_at	2.5	5.9	18.4	34.6	30.5	43.4	4.04851	2.01739	0.0114518
14780	1430474_a_at	717.7	678.2	628.8	564.1	561.9	534.4	-1.2194	-0.286177	0.0114537	mitochondrial carrier homolog 2 (C. elegans)	Mtch2
44015	1459720_x_at	37.2	34.6	40.7	28.2	22.8	19	-1.60714	-0.684498	0.0114628
28424	1444118_at	4.9	3.1	3.9	1.9	1.3	1.3	-2.64444	-1.40296	0.01149	predicted gene 10523	Gm10523
3996	1419665_a_at	83.3	75.1	68.1	53.6	52.2	58	-1.38278	-0.467576	0.0115002	nuclear protein transcription regulator 1	Nupr1
37496	1453201_at	36.9	39.3	44.5	19	29.2	19.7	-1.77761	-0.829942	0.0115068	Ras association (RalGDS/AF-6) domain family (N-terminal) member 10	Rassf10
39338	1455043_at	25.8	32.8	34.5	42.3	43.1	46	1.41139	0.497112	0.0115306	transportin 1	Tnpo1
24239	1439933_at	26.5	10.9	20.9	46.5	47.9	37.7	2.26587	1.18006	0.0115318	RIKEN cDNA B430316J06 gene	B430316J06Rik
22223	1437917_at	162.8	148.9	148.1	186	188.5	173.5	1.19182	0.253169	0.0115371	RIKEN cDNA D530037H12 gene	D530037H12Rik
1519	1417188_s_at	171	156	175.3	198.1	192.4	206.6	1.18873	0.249423	0.0115609	ubiquitin-conjugating enzyme E2K	Ube2k
24912	1440606_at	13.3	13.8	19.1	34.3	29.7	25.1	1.92857	0.947533	0.0115666
5837	1421531_at	5.8	6	9.7	2	1.2	1.1	-5	-2.32193	0.0115852	A kinase (PRKA) anchor protein 3	Akap3
20321	1436015_s_at	492.6	466	415.6	585	558.3	555	1.23585	0.305499	0.0115975	serine/threonine kinase 4	Stk4
13811	1429505_at	152.4	156.2	189.9	218.3	227.9	248.1	1.39278	0.477966	0.011611	neurobeachin like 1	Nbeal1
20196	1435890_at	169.2	170.4	170.7	146.5	158.1	142	-1.14263	-0.192362	0.0116252	atlastin GTPase 3	Atl3
23711	1439405_x_at	1541.9	1498.3	1410.5	1659.5	1792.6	1719.6	1.162	0.216606	0.0116278	cyclin N-terminal domain containing 1	Cntd1
12510	1428204_at	737	706.9	720.7	673.5	636.4	622.2	-1.12034	-0.163931	0.0116466	gamma-aminobutyric acid (GABA) A receptor, subunit beta 2	Gabrb2
36671	1452376_at	75	61.2	57	34.7	41.2	40.5	-1.65979	-0.731004	0.0116629	zinc finger protein 444	Zfp444
45001	1460709_a_at	267.6	240.1	266.5	363.1	342.5	427.7	1.46383	0.549752	0.0116753	abhydrolase domain containing 16A	Abhd16a
31184	1446878_at	13.3	9.8	11.4	1.7	6.5	3.5	-2.94872	-1.56009	0.0116903
41357	1457062_at	93	88	93.4	69.5	81.1	72.4	-1.23049	-0.299237	0.0116949	KAT8 regulatory NSL complex subunit 1	Kansl1
22995	1438689_at	57.8	55.2	56.9	50.2	47.1	51.8	-1.1395	-0.188406	0.0117027	zinc finger protein 784	Zfp784
1521	1417190_at	108	123.5	128.3	199.9	178.6	158.5	1.4925	0.577727	0.0117113	nicotinamide phosphoribosyltransferase	Nampt
40348	1456053_at	15.6	18.7	17.4	10.2	2.8	1.8	-3.49324	-1.80457	0.0117194
1939	1417608_a_at	3159.9	3431.2	3232.2	3658	3645.8	3607.1	1.11072	0.15149	0.0117685	ribosomal protein L13A	Rpl13a
38179	1453884_at	12.4	17	10.1	5.1	1	0.5	-5.98485	-2.58131	0.0117738	RIKEN cDNA 4930402K13 gene	4930402K13Rik
39601	1455306_at	118.9	119.5	136.8	168	156	151.7	1.26786	0.342392	0.0117839	family with sequence similarity 193, member A	Fam193a
10019	1425713_a_at	170.7	151	157.7	200.3	183.8	200.1	1.21861	0.285232	0.0117857	ring finger protein 146	Rnf146
24465	1440159_at	31.7	31.8	32.3	14.3	24.3	19.1	-1.66031	-0.731454	0.0117902	RIKEN cDNA 1700010B09 gene	1700010B09Rik
8848	1424542_at	17.7	30.1	26.5	44.6	41.1	40.2	1.69448	0.760844	0.0118021	S100 calcium binding protein A4	S100a4
2822	1418491_a_at	100.4	119	118	87.2	68.5	71	-1.48831	-0.573676	0.011836	pseudouridine synthase 3	Pus3
8847	1424541_at	517	507.7	536.9	557.9	586.3	587.2	1.10873	0.148914	0.0118426	transmembrane protein 70	Tmem70
1749	1417418_s_at	3733.2	3560.1	3423.1	3114.5	3051	3214.9	-1.14242	-0.192099	0.0118523	cytochrome c oxidase subunit VIa polypeptide 1 /// uncharacterized LOC101056141	Cox6a1 /// LOC101056141
25658	1441352_at	26.8	23.7	26	17.5	17.5	21.2	-1.36121	-0.44489	0.0118556	RIKEN cDNA 9430034N14 gene	9430034N14Rik
11834	1427528_a_at	219.7	228.9	202	142.6	159.4	178.2	-1.35485	-0.438135	0.0118583	Eph receptor A7	Epha7
600	1416269_at	2870	3013.8	2781.4	2623.5	2501.2	2518.8	-1.13367	-0.181	0.0118641	ATP synthase, H+ transporting, mitochondrial F0 complex, subunit F2	Atp5j2
30567	1446261_at	11.8	12.2	14.4	6.6	9.2	6.1	-1.75342	-0.810175	0.0118732	DNA segment, Chr 1, ERATO Doi 507, expressed	D1Ertd507e
14521	1430215_at	18.8	17.2	25.8	8.4	9.5	5.1	-2.68696	-1.42597	0.0118795	RIKEN cDNA 2610020H08 gene	2610020H08Rik
484	1416153_at	1237.2	1134.6	1131	1346.4	1316.3	1316.2	1.13592	0.183861	0.0118796	signal recognition particle 54A /// signal recognition particle 54B /// signal recognition particle 54C	Srp54a /// Srp54b /// Srp54c
15198	1430892_at	3.6	3.7	4	2.8	2.5	1.8	-1.59155	-0.670432	0.011886	testis expressed 37	Tex37
44344	1460051_at	24	21.5	15.4	9.6	9.2	7.4	-2.32443	-1.21688	0.0118963	coiled-coil domain containing 64B	Ccdc64b
33283	1448983_at	2.6	2.9	2.7	2.1	1.4	1.8	-1.54717	-0.629632	0.0119502	CMT1A duplicated region transcript 4	Cdrt4
29744	1445438_at	136	147.4	130.5	105.2	118	107.3	-1.25234	-0.324632	0.0119712	DDHD domain containing 1	Ddhd1
7663	1423357_at	57.1	58.7	59.2	49.5	37.8	40.2	-1.37255	-0.456858	0.0119737	lipoyl(octanoyl) transferase 2 (putative)	Lipt2
39023	1454728_s_at	770.3	844	754	951.9	905.3	917.4	1.17156	0.228428	0.0119882	ATPase, aminophospholipid transporter (APLT), class I, type 8A, member 1	Atp8a1
21617	1437311_at	553.3	454.1	507	823.3	658.5	780.4	1.49379	0.57898	0.0119949	small nucleolar RNA host gene 11	Snhg11
39017	1454722_at	1233.4	1277.1	1182.7	1337.8	1375.5	1367.4	1.10492	0.143945	0.0120057	phosphatase and tensin homolog	Pten
11983	1427677_a_at	114	110.9	109.6	118	119.8	123.3	1.07952	0.110392	0.0120062	SRY (sex determining region Y)-box 6	Sox6
33437	1449137_at	800.5	746.1	655.7	533.4	554.2	554.5	-1.34115	-0.423469	0.0120366	pyruvate dehydrogenase E1 alpha 1	Pdha1
12341	1428035_at	29.8	33.7	26.1	20.3	12.6	15.7	-1.84362	-0.882542	0.0120461	fibrous sheath-interacting protein 1	Fsip1
1460	1417129_a_at	1576.7	1532.1	1576.6	1964.9	1835.6	1744.2	1.1834	0.242937	0.012079	Meis homeobox 2	Meis2
41932	1457637_at	195.2	174.6	154.4	126.2	94.6	108.6	-1.59138	-0.670277	0.0121084
3006	1418675_at	3.4	0.8	1.6	9.2	13.3	18	6.98276	2.8038	0.0121106	oncostatin M receptor	Osmr
35722	1451427_a_at	106.5	86.1	114.1	68.6	60.8	64.2	-1.58419	-0.663749	0.0121215	EGF-like domain 7	Egfl7
18647	1434341_x_at	430.2	450.5	454.4	286.8	357	241.4	-1.50825	-0.592872	0.0121299	ubiquinol-cytochrome c reductase, complex III subunit X	Uqcr10
7151	1422845_at	557.6	589	588.8	630.7	629.1	619.4	1.08286	0.11485	0.0121399	calnexin	Canx
21734	1437428_x_at	90.8	90.9	102.8	61.6	76.1	70.9	-1.36385	-0.447689	0.0121747	eukaryotic translation initiation factor 2B, subunit 2 beta	Eif2b2
30245	1445939_at	11.5	12.9	10.4	3.5	7.7	5	-2.14815	-1.10309	0.0121764
7300	1422994_at	70.3	67	63	50.1	45.6	33.2	-1.55392	-0.63591	0.0121946	phosphoinositide kinase, FYVE finger containing	Pikfyve
12122	1427816_at	70.9	72.4	69	56.9	39.7	49.5	-1.45311	-0.539148	0.0121957	serine/arginine-rich splicing factor 2	Srsf2
12726	1428420_a_at	19.4	27.1	17.4	1.5	3.8	9.4	-4.34694	-2.12	0.0122051	exocyst complex component 3-like 4	Exoc3l4
24470	1440164_x_at	34.9	43.7	24.7	5.6	9.3	12.4	-3.78388	-1.91987	0.0122091	CD8 antigen, alpha chain	Cd8a
16338	1432032_a_at	14.2	22.4	17.1	1.9	1	8.1	-4.88182	-2.28742	0.0122313	artemin	Artn
32592	1448292_at	1865.4	1951.7	1721	1576.7	1532.1	1531.9	-1.19338	-0.255049	0.0122546	ubiquinol-cytochrome c reductase, complex III subunit XI	Uqcr11
11070	1426764_at	649.7	634.5	660.4	742.1	737	817.3	1.18091	0.239901	0.0122594	ornithine decarboxylase antizyme 2	Oaz2
15596	1431290_at	11	7.3	5.2	18.9	17.6	14.6	2.17447	1.12066	0.012262	RIKEN cDNA 4930588J15 gene	4930588J15Rik
12358	1428052_a_at	180.8	202.6	188.9	234.9	287.6	265.1	1.3762	0.460692	0.0122621	zinc finger, MYM domain containing 1	Zmym1
11356	1427050_at	364	356.3	383.2	406	442.1	440.3	1.16756	0.223494	0.0122779	thioredoxin domain containing 16	Txndc16
32345	1448042_s_at	18.4	21.2	14.2	4.7	3.4	9.6	-3.03955	-1.60386	0.0122896	ring finger protein 2	Rnf2
1152	1416821_at	53.6	64.8	46.8	30.5	33.4	32.2	-1.71904	-0.781605	0.0123116	DiGeorge syndrome critical region gene 14	Dgcr14
40366	1456071_a_at	5026.7	5138.7	5530.2	4413.1	4446.5	3945	-1.22578	-0.293698	0.012338	cytochrome c, somatic	Cycs
20381	1436075_at	51.8	59.3	50.5	31.5	9.7	27	-2.3695	-1.24458	0.0123405	secreted frizzled-related sequence protein 5	Sfrp5
15908	1431602_a_at	217.9	240.8	170	91.7	116.6	122.8	-1.89882	-0.925105	0.012371	UDP-glucose glycoprotein glucosyltransferase 2	Uggt2
28697	1444391_at	37.4	44.8	42.3	29.9	17.6	22.8	-1.77098	-0.824549	0.0123761
14869	1430563_at	25.5	20.4	24.7	10.2	12.8	2.5	-2.76863	-1.46917	0.0123794	minichromosome maintenance complex component 9	Mcm9
15797	1431491_at	6.9	8.8	11.8	23.4	22.1	16.2	2.24364	1.16584	0.012382	RIKEN cDNA 9430087N24 gene	9430087N24Rik
38931	1454636_at	609.3	630.2	594	730.2	669.1	728.7	1.16062	0.214898	0.0123888	chromobox 5	Cbx5
27401	1443095_at	28.1	29.2	35.7	41.5	44.4	40.9	1.36344	0.447252	0.0124141
20266	1435960_at	901	964.2	992	1135	1084	1201.8	1.19726	0.259732	0.0124144	PNMA-like 2	Pnmal2
6060	1421754_at	755.2	787.8	769	837.5	876.9	916	1.13772	0.186141	0.0124193	cDNA sequence AY036118	AY036118
1083	1416752_at	30.9	21	33.7	10.6	13.2	10.6	-2.48837	-1.3152	0.0124268	LIM domain binding 3	Ldb3
25968	1441662_at	68.2	68	66	55.9	56.7	46.6	-1.2701	-0.344943	0.0124332	cytochrome P450, family 4, subfamily x, polypeptide 1	Cyp4x1
9861	1425555_at	13.1	9.1	16	21.7	23.3	20.8	1.72251	0.784515	0.0124485	cyclin-dependent kinase 12	Cdk12
37552	1453257_at	289.2	258.6	283	236.4	218.8	234.6	-1.20441	-0.268323	0.0124694	1-acylglycerol-3-phosphate O-acyltransferase 5 (lysophosphatidic acid acyltransferase, epsilon)	Agpat5
29285	1444979_at	21.5	16.5	17.6	3.9	2.3	10.7	-3.28994	-1.71806	0.012484
3244	1418913_at	14.5	16.2	8.1	2.3	2.8	0.4	-7.05455	-2.81855	0.0124908	betaine-homocysteine methyltransferase 2	Bhmt2
31843	1447537_at	207.7	209.3	200.8	245.7	235.8	269.3	1.21528	0.281289	0.0124917	RIKEN cDNA 1500032P08 gene /// complement factor properdin	1500032P08Rik /// Cfp
12277	1427971_at	204.9	184.1	208.3	254.4	254	230.5	1.23707	0.306923	0.0124938	cell division cycle 73, Paf1/RNA polymerase II complex component	Cdc73
862	1416531_at	234.9	282.8	258	198.6	200.1	197.8	-1.30042	-0.378977	0.0125079	glutathione S-transferase omega 1	Gsto1
29884	1445578_at	31.9	29.4	36.4	20.8	24.6	19.9	-1.49617	-0.581276	0.0125115
28709	1444403_at	32.9	36.1	29.7	25.4	23.4	24.8	-1.34103	-0.423344	0.012524
14529	1430223_at	5.7	7.8	4.5	20.9	17.6	12.7	2.84444	1.50815	0.0125833	RIKEN cDNA 4930442P07 gene	4930442P07Rik
1005	1416674_at	40.2	39.4	54.6	66.3	71.2	65	1.50894	0.593537	0.0125858	protein tyrosine phosphatase, receptor type, U	Ptpru
41199	1456904_at	100.7	99	104.7	129.9	114	125.4	1.21321	0.278825	0.0125891
834	1416503_at	583.3	637.6	514.5	732.2	728.3	777.1	1.28939	0.366684	0.0126204	latexin	Lxn
35429	1451134_a_at	311	359.6	310.2	389.5	409.1	413.2	1.23552	0.305121	0.0126223	TM2 domain containing 2	Tm2d2
38308	1454013_at	47.6	43.2	43	30.7	36.8	35.5	-1.29903	-0.377434	0.0126223	RIKEN cDNA 1810062O18 gene	1810062O18Rik
21359	1437053_x_at	22	16.3	17	0.7	8.9	6.6	-3.41358	-1.77129	0.0126396	apoptosis inhibitor 5	Api5
5985	1421679_a_at	5.8	7.1	12.1	27	51	39.8	4.712	2.23634	0.012649	cyclin-dependent kinase inhibitor 1A (P21)	Cdkn1a
31619	1447313_at	26.8	28.8	25.2	48.6	40.4	37.3	1.56312	0.644427	0.0126579
35680	1451385_at	590.2	535.8	570.8	490	475.4	502.6	-1.15586	-0.208965	0.0126837	family with sequence similarity 162, member A	Fam162a
6462	1422156_a_at	7404.1	8409	7144.3	5819.4	5432.5	6117.2	-1.32174	-0.402436	0.0126841	predicted gene 10420 /// predicted gene 6139 /// predicted gene 8841 /// predicted gene 8842 /// ribosomal protein S2	Gm10420 /// Gm6139 /// Gm8841 /// Gm8842 /// Rps2
2568	1418237_s_at	24.5	15.2	21.4	9.6	2.3	3.5	-3.96753	-1.98824	0.0127004	collagen, type XVIII, alpha 1	Col18a1
43315	1459020_at	41.4	42.3	33.4	51.1	56.8	52.1	1.36635	0.450331	0.0127028	adhesion molecule with Ig like domain 1	Amigo1
42816	1458521_at	37.4	40.1	35.1	17.3	28.3	21.9	-1.66815	-0.738247	0.012713
37166	1452871_at	64.3	67.9	65.5	57.1	46.5	46.4	-1.318	-0.39835	0.0127252	nei endonuclease VIII-like 1 (E. coli)	Neil1
23573	1439267_x_at	3162.5	2844.7	3096.5	2642.8	2607.2	2516.5	-1.17218	-0.229188	0.0127334	predicted gene 11633 ///	Gm11633 /// Gm11633
22043	1437737_at	104.1	99.9	100.9	74.2	73	89.1	-1.29031	-0.367717	0.0127519	DIS3 mitotic control homolog (S. cerevisiae)-like	Dis3l
35559	1451264_at	132.9	137.5	128	157.3	145.9	159.2	1.16064	0.214924	0.0127833	FERM domain containing 6	Frmd6
3948	1419617_at	44.7	50.6	48.2	29.1	36.9	37.1	-1.39185	-0.477006	0.0127866	potassium intermediate/small conductance calcium-activated channel, subfamily N, member 1	Kcnn1
1805	1417474_at	336.2	297.3	326.3	237.9	239.4	272.8	-1.27956	-0.355651	0.0127884	intraflagellar transport 46	Ift46
33481	1449181_at	392.7	377.1	392.9	342.5	362.7	337.3	-1.1153	-0.157432	0.0127902	ferrochelatase	Fech
8452	1424146_at	899.5	859.2	814.5	756.9	753.6	741.1	-1.14283	-0.192613	0.0127933	G protein-coupled receptor 37-like 1	Gpr37l1
19134	1434828_at	1157.2	1231.4	1083.6	1367.7	1338.9	1331.8	1.16307	0.217934	0.0128071	family with sequence similarity 102, member B	Fam102b
1306	1416975_at	48.8	50.2	51.5	45.9	42.4	45.2	-1.12734	-0.172924	0.0128249	signal transducing adaptor molecule (SH3 domain and ITAM motif) 2	Stam2
16071	1431765_a_at	5303.2	6031	5149.6	4222.4	3386.4	4069.4	-1.4115	-0.497231	0.0128266	predicted gene 10420 /// predicted gene 6139 /// predicted gene 8841 /// predicted gene 8842 /// ribosomal protein S2	Gm10420 /// Gm6139 /// Gm8841 /// Gm8842 /// Rps2
11395	1427089_at	254	273.5	278.7	297.4	311.3	312.9	1.14314	0.193003	0.0128392	cyclin T2	Ccnt2
28578	1444272_at	23.6	25.6	26.3	7.8	8.8	17.6	-2.2076	-1.14248	0.0128515	inturned planar cell polarity effector homolog (Drosophila)	Intu
9681	1425375_at	2.7	1.9	1.5	12.6	9.2	6.7	4.67213	2.22408	0.0128787	TD and POZ domain containing 1	Tdpoz1
3011	1418680_at	93.4	76.2	82.1	44	62.5	46.1	-1.64941	-0.72195	0.0128828	serine (or cysteine) peptidase inhibitor, clade D, member 1	Serpind1
4099	1419768_at	36.5	28.4	23.6	5.7	14.8	8.8	-3.02048	-1.59478	0.0128958	CD22 antigen	Cd22
18741	1434435_s_at	1538.8	1659	1583	1414	1455.3	1377.7	-1.12569	-0.170808	0.0129269	cytochrome c oxidase assembly protein 17	Cox17
14686	1430380_at	37.3	37.6	30.7	24.4	26	25.7	-1.38765	-0.472641	0.0129826	N-6 adenine-specific DNA methyltransferase 1 (putative)	N6amt1
36747	1452452_at	5.2	4.4	4.9	3.9	3.2	3.4	-1.38095	-0.465664	0.0130119
1619	1417288_at	172.7	199.3	195	156.2	148.6	138.9	-1.27789	-0.353764	0.0130405	pleckstrin homology domain-containing, family A (phosphoinositide binding specific) member 2	Plekha2
7985	1423679_at	462	470.9	456.2	387.5	430.2	402.5	-1.13842	-0.187033	0.0130579	transmembrane protein 246	Tmem246
41790	1457495_at	89.8	79.2	112	163.8	147.9	134.2	1.58683	0.66615	0.0130605	RIKEN cDNA 2900052N01 gene	2900052N01Rik
5203	1420897_at	113.5	115.9	125.8	138.6	150.1	137.3	1.19932	0.262222	0.01307	synaptosomal-associated protein 23	Snap23
9505	1425199_a_at	29	26.5	25.9	14.7	10.3	19.7	-1.82103	-0.864754	0.0131287	erythrocyte protein band 4.1-like 5	Epb4.1l5
24281	1439975_at	62.7	57.9	61.2	44.4	37.7	50.2	-1.37415	-0.458539	0.0131295	transmembrane protein 150C	Tmem150c
32597	1448297_a_at	697.1	727.5	693.3	813.3	761.7	823.7	1.13258	0.179618	0.0131384	tyrosine kinase, non-receptor, 2	Tnk2
12857	1428551_at	156.3	168.7	162.4	138	146	130.6	-1.17559	-0.233386	0.0131484	tRNA methyltransferase 11	Trmt11
4763	1420457_at	4.9	5.4	3.9	1.4	1.4	2.9	-2.49123	-1.31686	0.0131581	dishevelled 3, dsh homolog (Drosophila)	Dvl3
10888	1426582_at	547.7	599.4	615.8	683.6	676	669.8	1.15117	0.203103	0.0131639	activating transcription factor 2	Atf2
25285	1440979_at	43	38.9	52.9	27.1	19.6	26.7	-1.83651	-0.876969	0.013169
18612	1434306_at	244.3	258.9	211.5	332.5	310.3	296	1.31356	0.39348	0.0131764	RAB3A interacting protein	Rab3ip
34878	1450583_s_at	12.1	7.9	14.7	2.9	1.3	3.7	-4.39241	-2.13501	0.0131782	formyl peptide receptor 3	Fpr3
13991	1429685_at	1403	1328.4	1416.6	1264.2	1257.5	1206.2	-1.11269	-0.154053	0.0131906	gamma-aminobutyric acid (GABA) A receptor, subunit beta 2	Gabrb2
1877	1417546_at	17.7	33.6	21.7	4.1	4.5	3.5	-6.03306	-2.59289	0.0132274	interleukin 2 receptor, beta chain	Il2rb
43609	1459314_at	41.9	44.2	51	24.4	34	29.2	-1.56507	-0.646226	0.0132628
32560	1448260_at	2607.4	2560.8	2203.3	1724.2	1713.7	1976.6	-1.36144	-0.44513	0.0132708	ubiquitin carboxy-terminal hydrolase L1	Uchl1
16950	1432644_at	11.5	18.2	23.1	1.2	4.2	3.2	-6.13953	-2.61813	0.0132758	RIKEN cDNA 6430711C07 gene	6430711C07Rik
579	1416248_at	377.1	343.2	367.8	303	296	253.2	-1.27681	-0.352547	0.0133029	NAD kinase	Nadk
546	1416215_at	294.5	337.6	291.2	171.7	167.3	237.8	-1.60073	-0.678728	0.0133029	golgi SNAP receptor complex member 1	Gosr1
10521	1426215_at	138	189.6	166.8	245.6	315.7	262.1	1.66545	0.735915	0.0133183	dopa decarboxylase	Ddc
42900	1458605_at	72.3	67	77.8	91.6	101.3	88.1	1.29433	0.37221	0.0133281
38598	1454303_at	15.1	18.6	17.8	10.6	2.4	4.6	-2.92614	-1.549	0.0133358	epsin 2	Epn2
22274	1437968_at	496.1	528.8	463.5	622.9	578.5	584.4	1.19981	0.262808	0.0133662	glutamate receptor, ionotropic, NMDA1 (zeta 1)	Grin1
9378	1425072_at	30	30.6	32.9	37	38.2	34.9	1.17754	0.235776	0.0133693	S-phase kinase-associated protein 2 (p45)	Skp2
43136	1458841_at	29.1	23	32.9	12.3	16.1	7	-2.40113	-1.26371	0.0133711
37983	1453688_at	25.3	29.3	37.9	46.6	46.3	46.8	1.51027	0.594807	0.0133774	CWF19-like 2, cell cycle control (S. pombe)	Cwf19l2
4018	1419687_at	88.5	86.3	89.2	79.1	75.6	68.6	-1.18227	-0.241555	0.0133803	MACRO domain containing 1	Macrod1
27484	1443178_at	12.3	14.5	11.6	2.4	4.5	8	-2.57718	-1.36579	0.0133816	ring finger protein 13	Rnf13
158	1415827_a_at	394.2	377.4	397.5	430.6	420.9	449.2	1.11257	0.15389	0.0133967	stress-associated endoplasmic reticulum protein 1	Serp1
27185	1442879_at	1.5	1.1	1.5	0.5	0.8	0.3	-2.5625	-1.35755	0.0134154
15515	1431209_s_at	35.4	31.2	35	13.8	24.4	20.6	-1.72789	-0.789012	0.013428	predicted gene 9856	Gm9856
23717	1439411_a_at	633.3	608.3	575.5	678.1	693.2	727.6	1.15508	0.207996	0.013439	exportin 7	Xpo7
30016	1445710_x_at	64.7	33.4	38.9	6.6	3.1	4.4	-9.71631	-3.28041	0.0134512	double homeobox B-like 1 /// doubl homeobox B-like 2 /// double homeobox B-like 3	Duxbl1 /// Duxbl2 /// Duxbl3
33904	1449604_at	14.1	16.5	16.2	11.3	6.5	6.4	-1.93388	-0.951501	0.013461	acid phosphatase 1, soluble	Acp1
1666	1417335_at	30	31	41.5	7	18.6	4.2	-3.4396	-1.78224	0.0134656	sulfotransferase family, cytosolic, 2B, member 1	Sult2b1
12848	1428542_at	228.2	234.8	228.4	213.1	195.5	209.5	-1.11859	-0.16168	0.0134727	eukaryotic translation initiation factor 1A domain containing	Eif1ad
7514	1423208_at	266.5	261.2	265.9	247.7	243.8	229.7	-1.10039	-0.138013	0.0134728	transmembrane protein 167	Tmem167
33178	1448878_at	40.9	31.2	37.5	24.1	20.2	24.9	-1.58382	-0.663404	0.0134748	Max dimerization protein 3	Mxd3
42367	1458072_at	21.8	24.6	13.6	6.7	5.2	6	-3.35196	-1.745	0.0135242
1051	1416720_at	307.5	311.2	308.6	276.2	281.6	295.5	-1.08672	-0.119983	0.0135343	serine/arginine-rich splicing factor 6	Srsf6
9670	1425364_a_at	535.2	527.6	503.8	562.5	576.5	561.7	1.0856	0.118492	0.0135482	solute carrier family 3 (activators of dibasic and neutral amino acid transport), member 2	Slc3a2
36479	1452184_at	3386.1	3199	2993.1	2730.5	2654.8	2725.5	-1.18092	-0.23991	0.0135511	NADH dehydrogenase (ubiquinone) 1 beta subcomplex, 9	Ndufb9
33448	1449148_a_at	221.4	213.6	209.4	239	270.1	257.9	1.19025	0.25127	0.0135815	putative homeodomain transcription factor 1	Phtf1
37404	1453109_at	109.4	86.2	101.5	65.3	68.8	49.8	-1.61555	-0.692027	0.0136223	arylsulfatase K	Arsk
7488	1423182_at	19.7	28.9	26.3	14.5	9.9	7.7	-2.33333	-1.22239	0.0136411	tumor necrosis factor receptor superfamily, member 13b	Tnfrsf13b
19415	1435109_at	109.9	87	96.6	64.7	71.9	56.9	-1.5168	-0.601027	0.0136418	RIKEN cDNA 0710007G10 gene /// transmembrane protein 175	0710007G10Rik /// Tmem175
41552	1457257_x_at	18.4	31.2	31.7	85.2	62.6	56.5	2.51292	1.32936	0.0136599	poliovirus receptor-related 3	Pvrl3
14259	1429953_at	16.4	12.7	19.6	4.6	8.8	5.3	-2.60428	-1.38088	0.0136684	RIKEN cDNA 2210011C24 gene	2210011C24Rik
37998	1453703_at	25	26.2	15.1	3.8	7.5	7.8	-3.4712	-1.79544	0.0136821	dynein, axonemal, heavy chain 17	Dnah17
40372	1456077_x_at	27.2	18.2	17.4	0.9	1.7	9	-5.41379	-2.43664	0.0136962	cell division cycle 25C	Cdc25c
12738	1428432_at	162.6	147.8	172.9	194.7	220.6	201.8	1.27685	0.352585	0.0136963	zinc finger, CCHC domain containing 24	Zcchc24
25839	1441533_at	10.1	12.2	12.7	4.1	7.6	2.9	-2.39726	-1.26139	0.0137038	predicted gene 4491	Gm4491
3161	1418830_at	20.3	10	14.2	3.3	1.5	1.1	-7.54237	-2.91502	0.0137301	CD79A antigen (immunoglobulin-associated alpha)	Cd79a
35676	1451381_at	341.9	350.2	332.3	303.6	260.8	289	-1.20037	-0.263485	0.0137405	adipogenesis associated Mth938 domain containing	Aamdc
11318	1427012_at	128.9	129.1	146.8	171.8	160.2	182.2	1.27026	0.34512	0.0137556	LanC (bacterial lantibiotic synthetase component C)-like 1	Lancl1
32183	1447877_x_at	62.4	48.8	57	71.4	73.8	73.7	1.30143	0.380094	0.0137738	DNA methyltransferase (cytosine-5) 1	Dnmt1
33191	1448891_at	86.5	100.6	101.6	74.2	77.6	73.7	-1.28027	-0.356444	0.013797	Fc receptor-like S, scavenger receptor	Fcrls
7144	1422838_at	90.1	108.6	95.2	60.4	76.6	62	-1.47688	-0.562557	0.0138068	potassium channel, subfamily U, member 1	Kcnu1
21304	1436998_at	472.3	560.6	549.5	639.4	655.4	642.1	1.22403	0.291635	0.0138125	sosondowah ankyrin repeat domain family member A	Sowaha
30202	1445896_at	1.6	2.6	7.9	12.4	16.9	20.1	4.08264	2.0295	0.0138159	RIKEN cDNA 2810433D01 gene	2810433D01Rik
13835	1429529_at	40.1	42	38.2	32.5	25.3	31.3	-1.35017	-0.433139	0.013816	tRNA splicing endonuclease 54 homolog (S. cerevisiae)	Tsen54
5413	1421107_at	34.2	29.9	19.9	50	44.2	54.1	1.76548	0.820057	0.0138281	serine/threonine kinase 4	Stk4
29405	1445099_at	8.7	8.3	14.3	21	17.7	22.2	1.94569	0.96028	0.0138737
45029	1460738_at	4.4	3.3	9.8	16.8	29	29.4	4.29714	2.10338	0.0138745	LIM domain containing 2	Limd2
38759	1454464_at	12.1	12.3	21.1	2.2	3.7	1.5	-6.14865	-2.62027	0.0139041	RIKEN cDNA 2700078F05 gene	2700078F05Rik
29293	1444987_at	35.8	27.5	29.4	54.1	46.6	43.2	1.55232	0.634425	0.0139194	cathepsin B	Ctsb
32561	1448261_at	21.4	23.1	18.4	12.4	9.3	3.2	-2.5261	-1.33691	0.0139397	cadherin 1	Cdh1
8217	1423911_at	459	502.8	460.9	559.9	617.4	554.6	1.21733	0.283724	0.0139448	protein phosphatase 2, regulatory subunit B', alpha	Ppp2r5a
31272	1446966_at	3	3.4	2.8	1.3	2	0.7	-2.3	-1.20163	0.013955	solute carrier family 25, member 48	Slc25a48
2895	1418564_s_at	1161.7	1154.5	1203.4	1271.7	1318.8	1249.2	1.09095	0.125582	0.0139625	serpine1 mRNA binding protein 1	Serbp1
28593	1444287_at	4.1	2.4	3.2	11.7	10.9	18.7	4.25773	2.09009	0.014025	expressed sequence AI853106	AI853106
35209	1450914_at	243.6	269.8	244.2	208.1	202.6	220.4	-1.20044	-0.263568	0.0140315	protein phosphatase 1, regulatory (inhibitor) subunit 14B	Ppp1r14b
1616	1417285_a_at	1772	1849.2	1775.4	1612.5	1648.3	1502.3	-1.133	-0.18015	0.0140317	NADH dehydrogenase (ubiquinone) 1 alpha subcomplex, 5	Ndufa5
36421	1452126_at	166.7	179.2	191.6	126.9	150.6	134.9	-1.30335	-0.38222	0.0140601	zinc finger protein 160	Zfp160
21296	1436990_s_at	5108.3	5682.8	4812	4263.8	3904.6	3924.7	-1.29025	-0.367649	0.0140904	coiled-coil-helix-coiled-coil-helix domain containing 10	Chchd10
23082	1438776_x_at	1532.3	1460.6	1578.8	1720	1668.5	1785.2	1.13168	0.178466	0.0140961	predicted gene 14586 /// ribosomal protein S17	Gm14586 /// Rps17
42071	1457776_at	26.4	22.2	20.3	12.2	16.3	12.4	-1.6846	-0.752403	0.0141224	N-acetylated alpha-linked acidic dipeptidase 2	Naalad2
8008	1423702_at	517.4	524.9	469	391.5	326.7	409.8	-1.3398	-0.422023	0.0141225	H1 histone family, member 0	H1f0
501	1416170_at	387.2	384.1	342.5	307	286.3	313.5	-1.22828	-0.296634	0.0141298	TNF receptor-associated protein 1	Trap1
25569	1441263_a_at	255.4	276.3	265.4	202.6	236.2	213.8	-1.22142	-0.288562	0.0141319	RIKEN cDNA A930005H10 gene	A930005H10Rik
17851	1433545_s_at	179.9	181.1	181.7	162.1	154.2	169.8	-1.11644	-0.158902	0.0141366	acyl-Coenzyme A dehydrogenase family, member 11	Acad11
33353	1449053_s_at	167	154.8	148.7	181	180.5	177.5	1.14559	0.196091	0.0141522	component of oligomeric golgi complex 1 /// conserved oligomeric Golgi complex subunit 1-like	Cog1 /// LOC102641618
22133	1437827_s_at	15.9	17.5	22.5	4.4	9.8	9.1	-2.39914	-1.26252	0.0141524	pore forming protein-like	Pfpl
20880	1436574_at	44	41.5	34.3	27.9	24.4	28.2	-1.4882	-0.573567	0.0142072	ZNF41, pseudogene	Znf41-ps
12243	1427937_at	428.3	423.1	432.9	366.7	400.6	362.4	-1.13685	-0.185043	0.0142223	VMA21 vacuolar H+-ATPase homolog (S. cerevisiae)	Vma21
32339	1448034_at	51.5	39.7	39.3	27.8	19	24.5	-1.83029	-0.872076	0.0142506	inhibitor of CDK, cyclin A1 interacting protein 1	Inca1
13981	1429675_at	20.4	13.3	24.7	0.8	2.1	7.3	-5.72549	-2.5174	0.0142646	single-pass membrane protein with coiled-coil domains 2	Smco2
42685	1458390_at	38.1	41.9	38.9	15.8	29.6	17.4	-1.89331	-0.920912	0.0142894
934	1416603_at	942.5	1241.8	1254.1	748.9	612.8	477.4	-1.86961	-0.902737	0.0142902	ribosomal protein L22	Rpl22
22544	1438238_at	155.9	164.4	120.6	87.8	91.6	93.4	-1.6162	-0.692608	0.0142921	RIKEN cDNA 2010315B03 gene	2010315B03Rik
27350	1443044_at	50.3	52.3	40.9	61.6	73.3	71	1.43484	0.520893	0.0142969	uncharacterized A830091E24	A830091E24
39823	1455528_at	52.2	48.8	39.2	62.1	71.3	75.2	1.48787	0.573253	0.0142988
24040	1439734_at	60.7	55.3	48.1	24.7	35.6	14	-2.20861	-1.14314	0.0143415
29397	1445091_at	97	115.3	110.1	84.8	76	84.8	-1.3127	-0.392541	0.0143822	ataxia telangiectasia and Rad3 related	Atr
8868	1424562_a_at	4124.1	4246.2	3865.5	3550.8	3612.7	3640.4	-1.13254	-0.179556	0.0143857	solute carrier family 25 (mitochondrial carrier, adenine nucleotide translocator), member 4	Slc25a4
22350	1438044_at	125.7	128.4	140.9	114.5	104.3	103.9	-1.22405	-0.291659	0.0144231	RIKEN cDNA 1700047M11 gene	1700047M11Rik
35708	1451413_at	115.2	90.9	104.4	59	77.3	63.3	-1.55561	-0.637482	0.0144377	calpastatin	Cast
17535	1433229_at	3.7	3.2	3	15.5	8.2	12.7	3.67677	1.87844	0.0144401	RIKEN cDNA 9430031J08 gene	9430031J08Rik
41838	1457543_at	52.4	66.9	60.5	38.8	39	44.7	-1.46776	-0.553611	0.014442	NOL1/NOP2/Sun domain family, member 7	Nsun7
34590	1450295_s_at	58.8	49.9	42.5	26.4	33.2	27.7	-1.73196	-0.792405	0.0144463	poliovirus receptor	Pvr
40985	1456690_at	27.9	21.4	13.5	0.5	5.7	1.1	-8.60274	-3.1048	0.0144539	ubiquitin specific peptidase 44	Usp44
2037	1417706_at	40.6	41.6	46.5	28.9	33.7	34.6	-1.32407	-0.404984	0.014455	alpha-N-acetylglucosaminidase (Sanfilippo disease IIIB)	Naglu
35537	1451242_a_at	145.1	136.7	147.7	187	227.1	251.3	1.54924	0.631564	0.0144991	protein phosphatase 5, catalytic subunit	Ppp5c
39481	1455186_a_at	43	38	29.8	60.5	59.6	51.1	1.54513	0.627725	0.0145017	urate (5-hydroxyiso-) hydrolase	Urah
35875	1451580_a_at	314.2	374.3	537.9	801.4	704.6	674.5	1.77797	0.830229	0.0145078	transthyretin	Ttr
10153	1425847_a_at	26.1	14.8	22.8	2.4	4.6	8.9	-4.00629	-2.00227	0.0145168	sterile alpha motif and leucine zipper containing kinase AZK	Zak
18648	1434342_at	1183.7	1055.6	1035.3	887.6	873.1	764.8	-1.29661	-0.37475	0.0145182	S100 protein, beta polypeptide, neural	S100b
9133	1424827_a_at	1678	1593.8	1623.1	1734.3	1746.6	1727.3	1.06401	0.0895055	0.0145481	casein kinase 1, alpha 1	Csnk1a1
15743	1431437_at	42.6	49.3	51.1	37.4	37	36.4	-1.29061	-0.368057	0.0145592	forkhead box P4	Foxp4
7805	1423499_at	81.3	80.7	85.1	70.3	75.9	68.5	-1.15091	-0.202773	0.0145792	synuclein, alpha interacting protein (synphilin)	Sncaip
43470	1459175_at	1.4	1.3	5.1	11.6	7.7	12.6	4.08974	2.03201	0.014586
9048	1424742_at	49.3	40.8	33	12.6	8.1	22.9	-2.82339	-1.49743	0.0145953	cAMP responsive element binding protein 3	Creb3
11539	1427233_at	470.3	500.6	470.1	586.9	537.1	545.2	1.15836	0.212086	0.0146012	teashirt zinc finger family member 1	Tshz1
43774	1459479_at	14.8	11	22.7	2.8	1.6	1	-8.98148	-3.16695	0.0146021	predicted gene 12072	Gm12072
4592	1420273_x_at	85.6	88.3	88.8	67.8	49	67.7	-1.42385	-0.509795	0.0146259	SAM domain and HD domain, 1	Samhd1
31522	1447216_at	71	83.9	62.4	49.4	39.7	35.1	-1.7496	-0.807023	0.014639	neurexin I	Nrxn1
36276	1451981_at	199.5	186	189.5	173.2	175.5	166.7	-1.11564	-0.157869	0.0146681	tubulin polyglutamylase complex subunit 1	Tpgs1
17903	1433597_at	1336.1	1373.8	1369.6	1268.6	1310.8	1289.7	-1.05438	-0.0763943	0.0146904	arginine and glutamate rich 1	Arglu1
17825	1433519_at	2217.9	2103.1	2004.1	2372.7	2502.3	2623	1.18544	0.245418	0.0147056	nuclear casein kinase and cyclin-dependent kinase substrate 1	Nucks1
43420	1459125_at	0.8	0.6	1.3	8.4	3.9	7	7.14815	2.83757	0.0147125	RIKEN cDNA D030059C06 gene	D030059C06Rik
43694	1459399_at	7.4	3.2	5.4	14.6	10.9	17	2.65625	1.40939	0.0147306
28435	1444129_at	33	25.5	34.3	20.5	19.1	18.8	-1.58904	-0.668156	0.0147696
35587	1451292_at	130	124	136.4	148.9	147	143.2	1.12474	0.169596	0.0147723	Zinc finger protein 212	Zfp212
29611	1445305_at	33.1	28.9	34	44.6	38.9	40.8	1.29479	0.37272	0.014778	solute carrier family 10 (sodium/bile acid cotransporter family), member 7	Slc10a7
8382	1424076_at	198.8	232.9	203.9	173.7	153.8	156.4	-1.31349	-0.39341	0.0147974	glycerophosphodiester phosphodiesterase domain containing 1	Gdpd1
18936	1434630_at	182.8	168.8	191	155.7	153.7	146.8	-1.18939	-0.250223	0.0148178	ankyrin repeat domain 28	Ankrd28
6776	1422470_at	1124	1027.3	983.3	1196.6	1236	1250.6	1.17501	0.232678	0.0148234	BCL2/adenovirus E1B interacting protein 3	Bnip3
25259	1440953_at	35.6	34.7	38.7	12.6	25.8	20.9	-1.83811	-0.878224	0.0148256	RIKEN cDNA 1700096K18 gene	1700096K18Rik
8700	1424394_at	710.8	698.6	702.2	818.1	838.7	757.6	1.1434	0.193328	0.0148276	selenoprotein M	Selm
42619	1458324_x_at	44.3	42.2	38.8	34.6	31.5	35.1	-1.23814	-0.308177	0.0148304
37184	1452889_at	116.1	120.2	107.2	141.2	136.1	129.4	1.18399	0.243655	0.0148498	phospholysine phosphohistidine inorganic pyrophosphate phosphatase	Lhpp
39268	1454973_at	287.7	285.4	318.4	350.6	338	341.6	1.15558	0.208618	0.0148602	activating transcription factor 7 interacting protein	Atf7ip
19271	1434965_at	33.5	37.5	35.2	56.5	59.5	79.3	1.83898	0.878908	0.0148669	R3H domain and coiled-coil containing 1 like	R3hcc1l
13216	1428910_at	371.7	322.1	345.3	488.4	417	501.7	1.35415	0.43739	0.0149025	RIKEN cDNA 2310022B05 gene	2310022B05Rik
41192	1456897_at	56.1	59.9	68.5	24.1	31.7	44.1	-1.84685	-0.885064	0.0149158
24662	1440356_at	97.8	86.3	105.2	65	76.5	63.5	-1.41122	-0.496942	0.0149183	cytokine induced apoptosis inhibitor 1	Ciapin1
34437	1450142_a_at	6.1	7.6	8.5	3.8	4.6	4.6	-1.70769	-0.772048	0.0149268	caspase recruitment domain family, member 14	Card14
506	1416175_a_at	1989.1	1920.9	1928.9	1728.5	1694.7	1834.6	-1.11052	-0.151237	0.0149369	voltage-dependent anion channel 3	Vdac3
30552	1446246_at	1.5	5	10.2	19.1	15.8	15.7	3.02994	1.59929	0.0149827	predicted gene 438	Gm438
21784	1437478_s_at	919.5	1189	682.5	395.6	271.6	224.5	-3.12998	-1.64615	0.0150287	EF hand domain containing 2	Efhd2
15906	1431600_at	30	23.8	24.1	6.2	4.6	16.2	-2.88519	-1.52866	0.0150322	RIKEN cDNA 4930564C03 gene	4930564C03Rik
27249	1442943_at	7	4.4	13.7	21.8	18.3	22.5	2.49402	1.31848	0.0150333	ubiquitin specific peptidase 20	Usp20
22407	1438101_at	16.3	20.1	20.5	47.7	35.4	32.7	2.03515	1.02513	0.0150383	frizzled homolog 3 (Drosophila)	Fzd3
1302	1416971_at	4121.2	3692.7	3516.8	2999.4	3109.6	2941.8	-1.2519	-0.32412	0.0150563	cytochrome c oxidase subunit VIIa 2	Cox7a2
19048	1434742_s_at	293.9	281	282.1	362.3	344	414.6	1.30793	0.38729	0.0150804	apoptosis-inducing factor, mitochondrion-associated 3	Aifm3
40647	1456352_a_at	304.8	334.6	346.5	386.3	397.4	374.4	1.17466	0.232247	0.0150962	splicing factor 3b, subunit 2	Sf3b2
32848	1448548_at	890.6	885	926.2	991.3	955.2	1011.6	1.09486	0.13075	0.0150986	predicted gene 2808 /// tubby like protein 4	Gm2808 /// Tulp4
3745	1419414_at	504.7	519.1	459.7	420.5	417.7	424.9	-1.17449	-0.232036	0.0151137	guanine nucleotide binding protein (G protein), gamma 13	Gng13
38354	1454059_at	7.7	5.8	5.4	31.8	16.4	27.3	3.99471	1.99809	0.0151237	RIKEN cDNA 4930500F04 gene	4930500F04Rik
40501	1456206_at	2.1	1.6	2.6	0.9	1	0.8	-2.33333	-1.22239	0.0151456	predicted gene 13889	Gm13889
23841	1439535_at	77.9	62.2	60.7	40.7	36.1	46.8	-1.6246	-0.700081	0.0151475
20844	1436538_at	151.2	147.4	161.3	120.8	136.8	124.2	-1.20456	-0.268503	0.0152067	ankyrin repeat domain 37	Ankrd37
33188	1448888_at	802.5	812.5	790.1	721.9	652.9	727.3	-1.14414	-0.194266	0.0152144	protein phosphatase 1, regulatory (inhibitor) subunit 7	Ppp1r7
36056	1451761_at	5.4	1.1	2.8	16.6	9.6	12.3	4.13978	2.04956	0.0152167	homeobox B4	Hoxb4
41781	1457486_at	23.9	25.7	26.3	20.5	16	13.8	-1.50895	-0.593541	0.0152918
9700	1425394_at	15.5	9.2	16.5	29.9	25.7	22.9	1.90534	0.930048	0.0152957	cDNA sequence BC023105	BC023105
37451	1453156_s_at	131.1	110.4	143.5	91.8	86.5	87.3	-1.44955	-0.535603	0.0153054	prostaglandin reductase 2	Ptgr2
10625	1426319_at	14.9	14.7	11.6	18.3	19	17.7	1.33495	0.416787	0.0153192	platelet-derived growth factor, D polypeptide	Pdgfd
17876	1433570_s_at	247.4	264.5	254.4	274.2	277.5	283.4	1.08978	0.12404	0.0153236	N(alpha)-acetyltransferase 35, NatC auxiliary subunit	Naa35
8532	1424226_at	87.6	83.6	96.8	62.2	61.3	74.4	-1.35422	-0.437461	0.0153448	RIKEN cDNA 9030617O03 gene	9030617O03Rik
28430	1444124_a_at	3.6	4	1.6	13.6	23.5	13.5	5.5	2.45943	0.0153463	RIKEN cDNA E330017L17 gene	E330017L17Rik
32584	1448284_a_at	2302.1	2580	2288.5	1985.7	1904.2	2034.6	-1.21033	-0.2754	0.0153517	NADH dehydrogenase (ubiquinone) 1, subcomplex unknown, 1	Ndufc1
42771	1458476_at	4.3	3.5	3.3	2	1.3	2.4	-1.94737	-0.961526	0.0153628	argonaute RISC catalytic subunit 3	Ago3
21241	1436935_x_at	1919.2	1908	1894.7	2041.8	1975.3	1979.8	1.04806	0.0677226	0.0153859	chloride channel, nucleotide-sensitive, 1A	Clns1a
16042	1431736_at	1.5	2	1.4	0.9	0.7	0.9	-1.96	-0.970854	0.01539	RIKEN cDNA 4933405D12 gene	4933405D12Rik
16324	1432018_at	3.8	5.4	6.6	1.1	2	2.1	-3.03846	-1.60334	0.0153997	achaete-scute complex homolog 2 (Drosophila)	Ascl2
815	1416484_at	1718.5	1603	1890.6	2070.9	2111	2062.6	1.19808	0.260721	0.0154221	tetratricopeptide repeat domain 3	Ttc3
19530	1435224_at	447.1	420.9	424.5	504.2	480.6	468.8	1.12464	0.169466	0.0154347	CREB binding protein	Crebbp
17328	1433022_at	4.5	1.3	3	6.3	7.4	7	2.35227	1.23406	0.0154355	RIKEN cDNA 2310068G24 gene	2310068G24Rik
27971	1443665_at	80.3	76.3	75.4	91.7	108.6	96	1.27716	0.352934	0.0154527	DENN/MADD domain containing 5B	Dennd5b
38902	1454607_s_at	782.9	813.7	841.9	912.7	986.2	908.9	1.15145	0.203446	0.0154561	phosphoserine aminotransferase 1	Psat1
30006	1445700_at	9.5	7.7	8.6	5.3	2.9	0.9	-2.83516	-1.50343	0.0154561	proteasome (prosome, macropain) assembly chaperone 4	Psmg4
8745	1424439_at	28.4	22.4	31.6	16.6	7.8	12.9	-2.20912	-1.14347	0.0154765	RIKEN cDNA 1810065E05 gene	1810065E05Rik
5399	1421093_at	222.1	187.8	206.6	165.5	164.4	166	-1.24319	-0.314052	0.0154869	solute carrier family 7 (cationic amino acid transporter, y+ system), member 10	Slc7a10
25749	1441443_at	9.5	4.3	7.9	30.3	21.3	40.7	4.25346	2.08864	0.0154895
1101	1416770_at	791	836.4	713.4	383.5	410.3	602.5	-1.67643	-0.745393	0.0154896	serine/threonine kinase 25 (yeast)	Stk25
13728	1429422_at	44.6	35.2	41	63.3	54.1	53.8	1.41722	0.503062	0.0154934	RIKEN cDNA 4933412E12 gene	4933412E12Rik
21235	1436929_x_at	34.4	34.3	35.3	29.3	21.7	26	-1.35065	-0.433653	0.0154964	adenylate cyclase 3	Adcy3
22497	1438191_a_at	108.6	106.6	110.1	165.9	136.4	138.7	1.35567	0.439008	0.0155015	ring finger protein 40	Rnf40
9116	1424810_at	96	98.4	107	86.8	74.4	72.7	-1.28858	-0.365788	0.0155048	taspase, threonine aspartase 1	Tasp1
4470	1420151_at	14.2	22.2	21.9	6.8	4.4	9.9	-2.76303	-1.46625	0.0155163
17807	1433501_at	503	505.2	504.5	445.9	481.3	460.8	-1.08984	-0.124118	0.0155704	cathepsin O	Ctso
8015	1423709_s_at	405.4	396.8	415.5	450.6	512.4	511.8	1.21114	0.276361	0.0155749	phenylalanyl-tRNA synthetase, beta subunit	Farsb
10260	1425954_a_at	5.1	1.4	6.3	14.3	26	28.5	5.375	2.42626	0.0155799	apurinic/apyrimidinic endonuclease 2	Apex2
609	1416278_a_at	2324.8	2292	2252.7	1824	2082.7	2002.2	-1.16257	-0.217316	0.015583	ATP synthase, H+ transporting, mitochondrial F1 complex, O subunit	Atp5o
42423	1458128_at	42.8	58.9	47.1	82.3	90	69.5	1.625	0.70044	0.0156162	KAT8 regulatory NSL complex subunit 1-like	Kansl1l
19685	1435379_at	90	94.6	102.8	138.1	130.4	114.5	1.33264	0.414284	0.0156363	URB2 ribosome biogenesis 2 homolog (S. cerevisiae)	Urb2
10532	1426226_at	107.9	117.5	119.6	134.3	131.3	128.1	1.14116	0.1905	0.0156506	dual-specificity tyrosine-(Y)-phosphorylation regulated kinase 1a	Dyrk1a
27732	1443426_at	68.4	53.8	61.7	44.9	41.5	34.6	-1.51983	-0.603914	0.0156531	SAFB-like, transcription modulator	Sltm
25899	1441593_at	43.1	35.3	42.8	20.2	30.3	22.2	-1.66713	-0.737362	0.0156548
12511	1428205_x_at	635.8	606.9	679	566.2	542.4	540.3	-1.16544	-0.220879	0.0156678	gamma-aminobutyric acid (GABA) A receptor, subunit beta 2	Gabrb2
1264	1416933_at	259.3	225.5	246.1	304.1	296.8	279.1	1.204	0.267829	0.0156855	P450 (cytochrome) oxidoreductase	Por
36787	1452492_a_at	41.6	31.3	40.1	9.5	23.4	17.7	-2.2332	-1.15911	0.0156909	solute carrier family 37 (glycerol-3-phosphate transporter), member 2	Slc37a2
30955	1446649_at	54.1	60.8	51.8	45.5	39.2	36.9	-1.37089	-0.455111	0.0156959
41561	1457266_at	154.7	196.2	159.1	246	217.6	234.2	1.36824	0.452316	0.0157104	solute carrier family 38, member 6	Slc38a6
25339	1441033_at	75.1	76.3	87.3	57.1	54.6	36.9	-1.60633	-0.683764	0.0157115	transmembrane and tetratricopeptide repeat containing 2	Tmtc2
18614	1434308_at	51.2	58.2	45.6	67.8	66.5	65.5	1.28903	0.366288	0.0157273	solute carrier family 43, member 2	Slc43a2
31999	1447693_s_at	558.1	491.4	596.3	698.5	662.6	676.3	1.23794	0.30794	0.0157294	neogenin	Neo1
3659	1419328_at	116.1	119.6	108.6	99	86.8	97.6	-1.21489	-0.280826	0.0157459	sema domain, immunoglobulin domain (Ig), TM domain, and short cytoplasmic domain	Sema4f
16609	1432303_at	32.4	30.8	36.3	21.6	22	12.1	-1.78636	-0.837019	0.0157549	RIKEN cDNA 9330198I05 gene	9330198I05Rik
3287	1418956_at	7.2	5.1	5.1	19.4	27.6	15.2	3.57471	1.83783	0.0157656	testis-specific serine kinase 6	Tssk6
21842	1437536_at	98.6	96.9	99.1	44.5	67.9	73.8	-1.58217	-0.661904	0.0157663	fukutin related protein	Fkrp
676	1416345_at	277.3	227.5	254.3	175.8	197.6	193.8	-1.33833	-0.420432	0.0157685	translocase of inner mitochondrial membrane 8A1	Timm8a1
22148	1437842_at	179.3	177	150.6	257.2	221.5	217.3	1.37305	0.457386	0.0157725	phosphatidylinositol-specific phospholipase C, X domain containing 1	Plcxd1
3875	1419544_at	1446.9	1363.1	1401.5	1133.2	1254	1255.1	-1.15627	-0.209484	0.0158084	ATPase, H+ transporting, lysosomal V1 subunit C1	Atp6v1c1
2301	1417970_at	219.1	228.8	209.9	199.5	188.3	193.5	-1.1316	-0.178366	0.0158699	ATP synthase, H+ transporting, mitochondrial F0 complex, subunit S	Atp5s
20400	1436094_at	996.4	878.1	860.2	1072.9	1097.6	1086.4	1.19095	0.252117	0.015892	VGF nerve growth factor inducible	Vgf
34475	1450180_a_at	15.8	16	7.4	1.2	2.1	1.6	-8	-3	0.0158968	retinoic acid receptor, alpha	Rara
24440	1440134_at	31.6	25.4	32.3	20.6	21.4	20.7	-1.42424	-0.510195	0.0158985	cytochrome P450, family 4, subfamily a, polypeptide 31	Cyp4a31
34580	1450285_at	3.5	8.6	3.3	16.5	12.5	20.1	3.18831	1.67279	0.0159223	ubiquitin-activating enzyme, Chr Y	Uba1y
30642	1446336_at	2.9	0.6	1.9	10.7	6.9	14.1	5.87037	2.55345	0.0159315
43399	1459104_at	19.3	28.3	26.7	9.6	11.1	15	-2.08123	-1.05744	0.0159424	budding uninhibited by benzimidazoles 3 homolog (S. cerevisiae)	Bub3
27762	1443456_at	30.7	30.7	40.3	22.7	17.9	16.7	-1.77487	-0.827713	0.015954
38078	1453783_at	47.4	41.3	52.5	72.3	60.6	75.7	1.47734	0.562999	0.0160015	purine rich element binding protein A	Pura
21113	1436807_x_at	29.1	37.8	36.3	23.4	15.4	21.2	-1.72	-0.782409	0.0160129	tripartite motif-containing 62	Trim62
22721	1438415_s_at	67.1	65.7	71.1	81	75.4	84.3	1.18048	0.239374	0.0160192	Yip1 domain family, member 2	Yipf2
39605	1455310_at	149.7	132.9	139.3	120.7	122.1	119.6	-1.16418	-0.219318	0.016024	SR-related CTD-associated factor 8	Scaf8
30011	1445705_x_at	4.2	1.7	1	20.6	15.3	9.9	6.63768	2.73068	0.0160689	dipeptidylpeptidase 8	Dpp8
29035	1444729_at	46.1	39.3	39.4	32.3	23.7	28.5	-1.47692	-0.562595	0.0160731	RIKEN cDNA E130317F20 gene	E130317F20Rik
28398	1444092_at	89.7	73	120.9	158	147	151.5	1.60966	0.686757	0.016083	zinc finger protein 939	Zfp939
37332	1453037_at	118	139.2	145.8	95.4	94.1	68.8	-1.5602	-0.641732	0.0161088	ubiquitin specific peptidase 49	Usp49
36527	1452232_at	153.2	154.3	147.8	164.7	179	168.4	1.12475	0.169608	0.0161221	UDP-N-acetyl-alpha-D-galactosamine: polypeptide N-acetylgalactosaminyltransferase 7	Galnt7
2969	1418638_at	18.2	17.5	10.2	37.9	26.4	31.9	2.09586	1.06754	0.0161317	histocompatibility 2, class II, locus Mb1 /// histocompatibility 2, class II, locus Mb2 /// uncharacterized LOC102642102	H2-DMb1 /// H2-DMb2 /// LOC102642102
13970	1429664_at	32.4	24.8	34	41.9	46.5	41.7	1.42654	0.512515	0.016137	cyclin-dependent kinase-like 1 (CDC2-related kinase)	Cdkl1
39448	1455153_at	185.2	191.2	172.6	225.9	211.2	207	1.17322	0.230479	0.0161576	zinc finger protein 236	Zfp236
35353	1451058_at	162.3	160.6	199.2	115.5	128.9	104.3	-1.49728	-0.58234	0.0161742	malignant T cell amplified sequence 2	Mcts2
7409	1423103_at	210.4	188.1	188.4	162.2	169.4	157.4	-1.2002	-0.26328	0.0161796	regulatory factor X, 5 (influences HLA class II expression)	Rfx5
19859	1435553_at	315.3	393.4	351.3	435.6	505.8	497.2	1.35717	0.440601	0.016201	PDZ domain containing 2	Pdzd2
40166	1455871_s_at	170.5	160.9	158.1	135.9	147	128.8	-1.18897	-0.249715	0.0162016	ribosomal protein L13 /// Tax1 (human T cell leukemia virus type I) binding protein 3	Rpl13 /// Tax1bp3
13705	1429399_at	27.4	41.6	35.1	58.1	51.1	65.9	1.68204	0.750209	0.0162126	ring finger protein 125	Rnf125
9105	1424799_a_at	21.7	19.1	11	1.9	3.1	5.8	-4.7963	-2.26192	0.0162164	golgi coiled coil 1	Gcc1
3790	1419459_a_at	122.3	101	121.2	144.6	144.4	140.2	1.24586	0.317146	0.0162265	magnesium transporter 1	Magt1
24155	1439849_at	49.6	38.9	42.3	27.8	7.1	13.2	-2.71933	-1.44325	0.0162334	TraB domain containing 2B	Trabd2b
12452	1428146_s_at	168.1	207.4	193.8	147.6	124.6	137.7	-1.38888	-0.473917	0.0162359	acetyl-Coenzyme A acyltransferase 2 (mitochondrial 3-oxoacyl-Coenzyme A thiolase)	Acaa2
11260	1426954_at	399	367.8	367.7	441.2	414.9	435.7	1.13865	0.187326	0.0162587	tripartite motif-containing 33	Trim33
9642	1425336_x_at	138.9	120.4	136.7	197.1	176.3	233.1	1.53157	0.615007	0.0162702	histocompatibility 2, K1, K region	H2-K1
5120	1420814_at	1413.1	1461.2	1567.4	1688	1730.8	1866.3	1.18988	0.250819	0.0162715	guanosine diphosphate (GDP) dissociation inhibitor 2	Gdi2
660	1416329_at	828.6	890.3	898.9	791.7	780.7	767.2	-1.11891	-0.162093	0.0162746	cytoplasmic FMR1 interacting protein 1	Cyfip1
38892	1454597_at	10	13.2	11.3	2.9	7.3	2.2	-2.78226	-1.47626	0.0162836	RIKEN cDNA 4930423O20 gene	4930423O20Rik
30924	1446618_at	121.5	121.5	114.6	107	105.3	96	-1.15991	-0.214012	0.0162883	RIKEN cDNA A130088B03 gene	A130088B03Rik
22253	1437947_x_at	1911.3	1893	1872.4	1832.2	1832.2	1786.8	-1.04137	-0.0584786	0.0162929	voltage-dependent anion channel 1	Vdac1
1892	1417561_at	58	37.4	52.3	20.7	26.3	24.6	-2.06285	-1.04464	0.0162941	apolipoprotein C-I	Apoc1
16375	1432069_at	2.8	2.9	5.3	24.2	11.7	21	5.17273	2.37093	0.0162983	RIKEN cDNA 1700023G09 gene	1700023G09Rik
28113	1443807_x_at	12.4	11	15.7	7.2	7	3.9	-2.16022	-1.11118	0.0163032	cyclin F	Ccnf
41278	1456983_at	143.2	140.6	149.1	90.1	118.2	114.7	-1.34025	-0.4225	0.0163275
8651	1424345_s_at	297.9	294.3	289	316.4	323	306.6	1.07354	0.102371	0.0163319	ubiquitin-conjugating enzyme E2M	Ube2m
21887	1437581_at	44.5	45.4	47.2	53.7	52.5	59.9	1.21152	0.276824	0.0163488	zinc finger protein 800	Zfp800
37363	1453068_at	132.1	138	95.6	200.7	170.2	211.6	1.59284	0.671597	0.0163707	PR domain containing 2, with ZNF domain	Prdm2
23726	1439420_x_at	80.1	71.6	76.3	46.3	28.6	55.2	-1.7525	-0.809413	0.0163723	gamma-glutamyltransferase 5	Ggt5
17321	1433015_at	490.6	517.7	465.3	393.3	409.7	436.2	-1.18915	-0.249936	0.0163806	RIKEN cDNA 6330436F06 gene	6330436F06Rik
35059	1450764_at	9.9	10.2	7.1	5.4	2.2	2.1	-2.80412	-1.48755	0.0164103	acyloxyacyl hydrolase	Aoah
40684	1456389_at	179.5	239	207.5	146.9	134.2	120.6	-1.55838	-0.640044	0.0164108	zinc finger E-box binding homeobox 2	Zeb2
14492	1430186_at	19.6	23.9	16.8	12.3	5.6	8.6	-2.27547	-1.18617	0.0164155	odontogenic, ameloblast asssociated	Odam
25489	1441183_at	74.5	82.8	84.7	66.4	61.5	68.8	-1.2303	-0.29901	0.0164542
25675	1441369_at	389.3	368.6	382.7	404.2	403.9	412.2	1.06988	0.0974429	0.0164633	RIKEN cDNA C030017B01 gene	C030017B01Rik
2388	1418057_at	690.8	584.5	608.6	758.8	748.7	763.8	1.20564	0.269796	0.0164637	T cell lymphoma invasion and metastasis 1	Tiam1
16678	1432372_a_at	213.6	222.4	214.5	177.9	162.1	194.4	-1.21725	-0.283629	0.0164646	sepiapterin reductase	Spr
5629	1421323_a_at	1480.1	1425.7	1558.2	1687.6	1680.9	1827.9	1.16407	0.219175	0.0164923	GTPase activating protein (SH3 domain) binding protein 2	G3bp2
301	1415970_at	5452.7	5440.7	4868.4	4450.8	4213.2	4532.5	-1.19439	-0.256277	0.0165086	cytochrome c oxidase subunit VIc	Cox6c
27712	1443406_at	10.5	11.8	31.2	43.6	47.6	58.9	2.80561	1.48831	0.0165429	phospholipid scramblase 4	Plscr4
19058	1434752_at	138.1	124.3	134.8	158.7	151	148.7	1.15408	0.206741	0.0165894	zinc finger protein 207	Zfp207
24374	1440068_at	46.7	35.4	52	26.5	20.5	13.3	-2.22388	-1.15308	0.0166296
18105	1433799_at	173.6	153.1	182.6	128.2	112.3	136	-1.35272	-0.435866	0.0166481	retinol dehydrogenase 13 (all-trans and 9-cis)	Rdh13
10443	1426137_at	33.6	25.5	34.7	14	14.7	0.6	-3.20137	-1.67869	0.0166636	reduced expression 2	Rex2
34675	1450380_at	853.6	887.3	965.9	773.9	775.5	752.3	-1.176	-0.233888	0.016681	ependymin related protein 1 (zebrafish)	Epdr1
13852	1429546_at	33.8	24	20.1	9.5	10.8	5.2	-3.0549	-1.61113	0.0167006	RIKEN cDNA 4930423K06 gene	4930423K06Rik
22747	1438441_at	99	107.9	100.6	64.7	75.2	86.4	-1.35882	-0.44235	0.0167015
38224	1453929_at	5.3	3.7	3.6	2.3	1.6	1.6	-2.29091	-1.19592	0.0167242	ring finger protein 24	Rnf24
20929	1436623_at	91.2	77.8	73.9	57.5	55.3	62.7	-1.38405	-0.468891	0.0167409	ectonucleoside triphosphate diphosphohydrolase 7	Entpd7
36430	1452135_at	185.4	185.2	214.2	79.5	95	146	-1.82465	-0.867619	0.0167549	glutathione peroxidase 6	Gpx6
35361	1451066_at	459.6	506.5	490.4	533.8	549.5	545.7	1.11843	0.161481	0.0167867	membrane bound O-acyltransferase domain containing 7	Mboat7
15547	1431241_at	32.1	42.8	39.7	58.4	78.5	61.2	1.72862	0.789622	0.0167951	coiled-coil-helix-coiled-coil-helix domain containing 3	Chchd3
18646	1434340_at	279.9	280.1	260.7	136.4	212.8	117.2	-1.75965	-0.815287	0.0168166	ubiquinol-cytochrome c reductase, complex III subunit X	Uqcr10
5955	1421649_at	38	40.7	50.5	28.7	28.2	24.1	-1.59506	-0.673612	0.0168177	tumor necrosis factor receptor superfamily, member 8	Tnfrsf8
9723	1425417_x_at	22	12.2	15.5	4.3	1.6	6.2	-4.10744	-2.03824	0.0168207	killer cell lectin-like receptor subfamily A, member 21 /// killer cell lectin-like receptor, subfamily A, member 8	Klra21 /// Klra8
38899	1454604_s_at	140.2	179.5	192.8	94.9	88	116.6	-1.71119	-0.774996	0.0168611	tetraspanin 12	Tspan12
5740	1421434_at	29.3	41.2	29.5	6.9	17.3	15.6	-2.51256	-1.32916	0.016862	dynein, axonemal, heavy chain 5	Dnah5
30825	1446519_at	58.9	64.1	47.6	31.8	38.7	37.3	-1.58256	-0.66226	0.0168875	RIKEN cDNA A730091E23 gene	A730091E23Rik
35623	1451328_at	331.5	347.6	304.3	272.3	279.9	279	-1.18311	-0.242583	0.0168934	pecanex-like 3 (Drosophila)	Pcnxl3
17629	1433323_at	6.1	9.2	9.1	4.6	3.5	2.9	-2.21818	-1.14938	0.0168945	RIKEN cDNA 4930529F21 gene	4930529F21Rik
6619	1422313_a_at	55.6	52.1	63.1	38.9	42.4	45.3	-1.34913	-0.432031	0.0168952	insulin-like growth factor binding protein 5	Igfbp5
21627	1437321_at	13.6	5.7	2.1	29.3	20.2	23.1	3.39252	1.76236	0.0169219	ATPase, Na+/K+ transporting, alpha 4 polypeptide	Atp1a4
11747	1427441_a_at	81.7	84.8	94	63.6	51.9	33.9	-1.74364	-0.802103	0.0169292	succinate-Coenzyme A ligase, GDP-forming, beta subunit	Suclg2
14848	1430542_a_at	3326.4	3268	2931.9	2653.3	2702.3	2703.8	-1.18201	-0.241244	0.0169323	solute carrier family 25 (mitochondrial carrier, adenine nucleotide translocator), member 5	Slc25a5
36684	1452389_at	16.8	15	7.8	1.2	3.5	1.1	-6.82759	-2.77138	0.0169507	CD27 antigen	Cd27
5347	1421041_s_at	26.1	22.8	28.5	13.1	15.8	19.4	-1.60248	-0.68031	0.0169547	predicted gene 3776 /// glutathione S-transferase, alpha 1 (Ya) /// glutathione S-transferase, alpha 2 (Yc2)	Gm3776 /// Gsta1 /// Gsta2
11736	1427430_at	89.4	94.3	90.3	104.2	124.3	120.5	1.27372	0.349051	0.0169697	SUN domain containing ossification factor	Suco
44032	1459737_s_at	865.5	880.8	1296.5	2078.4	1546.1	1920.7	1.8224	0.86584	0.0169795	transthyretin	Ttr
39611	1455316_x_at	4030.8	4688.9	4045.7	2262	3072.6	3171	-1.50082	-0.585754	0.0169864	cDNA sequence BC094435	BC094435
18136	1433830_at	807.8	897.6	941.6	1056.2	1133.2	1037.4	1.21904	0.285746	0.0169935	heterogeneous nuclear ribonucleoprotein A2/B1	Hnrnpa2b1
3267	1418936_at	3.6	10.4	4.7	14.6	16.4	14	2.40642	1.26689	0.0170182	v-maf musculoaponeurotic fibrosarcoma oncogene family, protein F (avian)	Maff
41591	1457296_at	29.6	24.2	29.5	12.5	12	20.4	-1.85523	-0.891601	0.0170342	cartilage intermediate layer protein, nucleotide pyrophosphohydrolase	Cilp
23487	1439181_at	35.4	51.8	51.3	80.1	65.1	80.3	1.62816	0.703241	0.0170445	zinc finger protein 658	Zfp658
38051	1453756_at	82.3	82.9	73.1	92.7	93.2	100.7	1.20269	0.26626	0.0170514	RIKEN cDNA 2900075N08 gene /// neuroligin 3	2900075N08Rik /// Nlgn3
29558	1445252_at	32.2	41.2	49.9	15.8	13.9	23.7	-2.30899	-1.20726	0.0170734	kringle containing transmembrane protein 1	Kremen1
36866	1452571_at	12	9.5	10.3	5.9	4	7.4	-1.83815	-0.878255	0.0170762	tubulin alpha, related sequence 1	Tuba-rs1
28838	1444532_at	5.3	8.5	14.8	23.6	19	23.2	2.3007	1.20207	0.017094	nicastrin	Ncstn
19352	1435046_at	60.2	81.3	100.8	34.3	36.5	32.8	-2.3388	-1.22577	0.0171423
6171	1421865_at	32.8	27.2	28.8	18.3	22	13.5	-1.65056	-0.722954	0.0171515	diazepam binding inhibitor-like 5	Dbil5
3734	1419403_at	24.4	25.5	22.8	20.3	14.9	15.9	-1.4227	-0.508632	0.0171798	single-pass membrane protein with coiled-coil domains 4	Smco4
20076	1435770_at	117.7	117.9	133.8	144.9	157.6	145.9	1.21386	0.279602	0.0172108	thioredoxin-related transmembrane protein 4	Tmx4
7755	1423449_a_at	477	540.3	418.5	633.1	618.6	607.1	1.29461	0.372517	0.017241	actinin alpha 4	Actn4
27800	1443494_at	29.3	15.7	28.6	4.6	9.3	4.5	-4	-2	0.0172775	polymerase (RNA) III (DNA directed) polypeptide B	Polr3b
21069	1436763_a_at	579.1	516.7	505.9	620.3	709.7	702.8	1.26915	0.343864	0.0172784	Kruppel-like factor 9	Klf9
1549	1417218_at	33.2	37.9	35.6	22.5	29.7	23.2	-1.41512	-0.500924	0.0172945	calcium homeostasis modulator 2	Calhm2
36197	1451902_at	122.8	142.4	150.1	96.8	103.3	109.9	-1.33968	-0.421886	0.017307	zinc finger protein 758	Zfp758
20109	1435803_a_at	89.7	74.9	90.9	58	59.3	67.8	-1.38033	-0.465018	0.0173094	eukaryotic translation initiation factor 4E member 2	Eif4e2
43752	1459457_at	31.2	23.3	45.6	56.7	62.9	60	1.79421	0.843345	0.0173237	calcium/calmodulin-dependent protein kinase II, delta	Camk2d
25777	1441471_at	38	36	30.4	23.1	26.6	25.4	-1.39015	-0.475237	0.0173406	RIKEN cDNA 2810002D19 gene	2810002D19Rik
10493	1426187_a_at	528.9	558.1	502.1	590.4	618.9	595.6	1.1358	0.183709	0.0173787	HCLS1 associated X-1	Hax1
7042	1422736_at	309.1	302	331.9	348	375.2	360.2	1.14889	0.200236	0.0173847	RAN binding protein 9	Ranbp9
257	1415926_at	174	170.5	142.7	95.6	109.3	126.3	-1.47101	-0.556811	0.0173966	nucleoporin 62	Nup62
10249	1425943_at	17.2	17.4	20.2	6	5.8	13	-2.20968	-1.14384	0.017399	neuromedin U receptor 2	Nmur2
10564	1426258_at	1122.7	1388.6	1349.1	844.8	928.9	993	-1.39531	-0.480584	0.0174268	sortilin-related receptor, LDLR class A repeats-containing	Sorl1
677	1416346_at	107.8	116.5	101.3	71.6	89.4	84.1	-1.32844	-0.40973	0.0174755	translocase of inner mitochondrial membrane 8A1	Timm8a1
5618	1421312_a_at	1025.3	960.4	1054.4	707.8	655.7	866.4	-1.36333	-0.44714	0.0174888	kinesin family member C2	Kifc2
38212	1453917_at	34.7	37.8	26.7	17.6	15.7	21.8	-1.80036	-0.848288	0.0174908	interferon induced transmembrane protein 7	Ifitm7
29925	1445619_at	12.7	10.6	14.5	4.7	2.2	7.8	-2.57143	-1.36257	0.0175061
8064	1423758_at	2050.3	2021	2001.6	2071.8	2096.9	2099.6	1.03218	0.0456886	0.0175193	GTPase activating protein (SH3 domain) binding protein 2	G3bp2
16023	1431717_at	170.2	146.6	160	210.6	211.7	184.8	1.27328	0.34855	0.0175224	A kinase (PRKA) anchor protein 5	Akap5
13275	1428969_at	589.2	593.3	535	710.4	646.8	732.3	1.21659	0.282848	0.0175283	trafficking protein particle complex 8	Trappc8
23839	1439533_at	3.3	3.4	3.6	5.7	4.3	5.2	1.47573	0.561427	0.0175677	family with sequence similarity 229, member A	Fam229a
36425	1452130_at	1198.9	1145.1	1272.1	1015.9	1080.5	1034.1	-1.15512	-0.208041	0.0175715	thioredoxin-related transmembrane protein 2	Tmx2
37754	1453459_at	24.4	37.6	25.7	15.1	6	7.3	-3.08803	-1.62669	0.017572	RIKEN cDNA 1700028I16 gene	1700028I16Rik
34970	1450675_at	579.6	595.6	633.7	672.2	670.8	659.4	1.10697	0.146618	0.0175815	small ArfGAP 2	Smap2
1702	1417371_at	617.3	684	598.2	826.2	761.1	740.5	1.22548	0.293347	0.0176148	pellino 1	Peli1
19493	1435187_at	1318.6	1500.3	1404.8	1625.9	1594.2	1631.3	1.14861	0.199894	0.0176348	translocase of outer mitochondrial membrane 20 homolog (yeast)	Tomm20
12299	1427993_at	104.6	91.6	94.6	76.4	80.6	66.3	-1.30228	-0.381044	0.0176879	RUN and FYVE domain-containing 2	Rufy2
44388	1460095_at	6.1	6.1	10.5	0.7	2.6	0.9	-5.40476	-2.43423	0.0177067	SLX1 structure-specific endonuclease subunit homolog B (S. cerevisiae)	Slx1b
20731	1436425_at	54.3	43.2	49.3	21.9	33.1	33.6	-1.65688	-0.728473	0.0177108	KN motif and ankyrin repeat domains 4	Kank4
3904	1419573_a_at	96.9	98.2	95.8	124.2	114.7	140.6	1.30457	0.383577	0.0177231	lectin, galactose binding, soluble 1	Lgals1
44137	1459842_x_at	111.5	91	95.1	68.5	76.5	74.4	-1.35643	-0.439811	0.0177264	nucleotide binding protein 2	Nubp2
19581	1435275_at	57.4	67.3	74.1	44.7	38.4	48.9	-1.50606	-0.59078	0.0177375	cytochrome c oxidase subunit VIb polypeptide 2	Cox6b2
23153	1438847_at	56	53.3	64.1	44.6	45.7	45.1	-1.28065	-0.356876	0.0177682	Max dimerization protein 3	Mxd3
2899	1418568_x_at	1170.2	1213.1	1168.4	1113.8	1130.2	1127.5	-1.05345	-0.0751191	0.0177849	signal recognition particle 14	Srp14
42419	1458124_at	12.6	22.5	18.1	8.2	3.1	3.1	-3.69444	-1.88536	0.0177884	IQ motif containing GTPase activating protein 1 /// uncharacterized LOC102641119	Iqgap1 /// LOC102641119
28247	1443941_at	291.2	244	289.9	209.5	195.3	220.5	-1.31953	-0.40002	0.0177891	coiled-coil domain containing 149	Ccdc149
6928	1422622_at	100.1	120.4	119.9	87.4	79.1	88.6	-1.33438	-0.416168	0.0177902	nitric oxide synthase 3, endothelial cell	Nos3
26665	1442359_at	95.2	100.5	77.2	62.5	63.6	49.8	-1.55145	-0.633617	0.0177924	six transmembrane epithelial antigen of prostate 2	Steap2
825	1416494_at	1521.9	1622.3	1556.4	1349.6	1359.5	1459.1	-1.12773	-0.17342	0.0178139	NADH dehydrogenase (ubiquinone) Fe-S protein 5	Ndufs5
739	1416408_at	859.1	890.2	798	1038.1	1017.7	945.6	1.17827	0.236667	0.0178168	acyl-Coenzyme A oxidase 1, palmitoyl	Acox1
24136	1439830_at	178.6	187.1	209	221.8	240.9	241.1	1.22464	0.292356	0.01783	mitogen-activated protein kinase kinase kinase 5	Map3k5
43969	1459674_at	238.1	190.3	220.5	274.6	307.4	273.9	1.319	0.399446	0.0179067
23354	1439048_at	2215.3	2140.7	1971.2	1868.4	1762.4	1753.9	-1.17503	-0.232701	0.0179125	cell adhesion molecule 2	Cadm2
43299	1459004_at	21.2	27.3	32.2	11.8	6.8	15.3	-2.38053	-1.25128	0.0179164
43817	1459522_s_at	320.3	318.8	308.4	275.4	296.2	267.6	-1.12905	-0.175111	0.0179405	glycogenin	Gyg
35467	1451172_at	1803	1938.7	1710.9	1559.4	1576.8	1494.5	-1.17749	-0.235714	0.0179507	transformation related protein 63 regulated like	Tprgl
29079	1444773_at	16.6	9	16.1	3.4	3.3	5.4	-3.44628	-1.78504	0.0179526	RIKEN cDNA D430040D24 gene	D430040D24Rik
16400	1432094_a_at	460.4	472.8	448.9	519.1	497.2	544.9	1.12959	0.175793	0.0179538	coiled-coil domain containing 132	Ccdc132
4736	1420430_a_at	22	25.7	18.8	10.9	10.9	15.5	-1.78284	-0.834179	0.0179933	coiled-coil domain containing 159	Ccdc159
22875	1438569_at	8.9	3.1	1.5	17.4	14.1	12.7	3.27407	1.71109	0.0180031	coiled-coil domain containing 38	Ccdc38
40646	1456351_at	141.5	146.2	173.9	94.3	119.6	92.2	-1.508	-0.59264	0.018043	bromodomain containing 8	Brd8
22340	1438034_at	166	169.8	163.9	144.3	147.1	124.9	-1.20034	-0.263439	0.0180528	regulator of microtubule dynamics 1	Rmdn1
33241	1448941_at	67.1	62.1	57.5	26.3	47.1	25.8	-1.88206	-0.91231	0.0180657	UDP-Gal:betaGlcNAc beta 1,4- galactosyltransferase, polypeptide 2	B4galt2
1914	1417583_a_at	336.9	383.6	323.4	210.4	258.9	271.8	-1.40858	-0.494243	0.0180707	UTP3, small subunit (SSU) processome component, homolog (S. cerevisiae)	Utp3
20254	1435948_at	368.1	441.9	377.6	301.9	260.5	307	-1.366	-0.449957	0.0181083	transmembrane protein 181A /// transmembrane protein 181B, pseudogene /// transmembrane protein 181C, pseudogene	Tmem181a /// Tmem181b-ps /// Tmem181c-ps
20047	1435741_at	533.9	517	492.5	672	584.1	689.2	1.2604	0.333881	0.0181286	phosphodiesterase 8B	Pde8b
20105	1435799_at	159.4	195.1	162.2	108.2	125.5	129.8	-1.42146	-0.507372	0.0181343	SURP and G patch domain containing 2	Sugp2
34651	1450356_at	8.8	8.9	8.5	16.6	30.1	27.8	2.84351	1.50767	0.018156	thyrotropin releasing hormone receptor 2	Trhr2
1497	1417166_at	624.3	590.2	599.6	653	678.6	646.3	1.09029	0.124716	0.0181746	PC4 and SFRS1 interacting protein 1	Psip1
39773	1455478_at	104.7	109	112.6	140.8	123.9	127.1	1.20074	0.263918	0.0182256	protein tyrosine phosphatase, receptor type, f polypeptide (PTPRF), interacting protein (liprin), alpha 1	Ppfia1
12544	1428238_at	45.8	40.4	33.8	20.8	21.8	28.5	-1.68776	-0.755113	0.0182331	akirin 2	Akirin2
9460	1425154_a_at	70.4	62.8	63.3	52.1	49.7	57	-1.23741	-0.307318	0.0182564	colony stimulating factor 1 (macrophage)	Csf1
366	1416035_at	213.8	223.4	235.1	281.7	291.2	252.3	1.22743	0.295639	0.0182656	hypoxia inducible factor 1, alpha subunit	Hif1a
15782	1431476_at	38.8	32	25.6	1.5	11.2	16.5	-3.30137	-1.72306	0.018268	RIKEN cDNA 4933407I05 gene	4933407I05Rik
35113	1450818_a_at	1886.7	1834.9	1839.6	1789	1734.4	1712.2	-1.06219	-0.0870413	0.0182844	NADH dehydrogenase (ubiquinone) 1 alpha subcomplex, 7 (B14.5a)	Ndufa7
33130	1448830_at	550.8	527.9	532	742	616.9	676.8	1.26386	0.337837	0.0183174	dual specificity phosphatase 1	Dusp1
711	1416380_at	10.7	19.3	7.8	30.8	27.4	40.8	2.61905	1.38904	0.0183245	Moloney leukemia virus 10	Mov10
10711	1426405_at	76.3	81.9	86.3	100.6	104.8	92.5	1.2184	0.284994	0.0183416	ring finger protein 11	Rnf11
13570	1429264_at	329	295.3	281	252.1	234.7	216.9	-1.28649	-0.363435	0.0184064	family with sequence similarity 120A, opposite strand	Fam120aos
31887	1447581_at	12.9	23.5	27.4	39	39.5	49.9	2.01254	1.00902	0.0184071
27090	1442784_at	21.4	13.8	18.3	9.9	8.5	5.4	-2.2479	-1.16858	0.0184086
221	1415890_at	623.8	591.7	588.3	644.9	690	667.6	1.11016	0.150763	0.0184495	3'-phosphoadenosine 5'-phosphosulfate synthase 1	Papss1
14046	1429740_at	24.5	26.8	27.5	15.5	10	19.6	-1.74723	-0.805068	0.0184521	tetratricopeptide repeat domain 7	Ttc7
10732	1426426_at	312.9	322.6	328	300.2	273.6	271.2	-1.14024	-0.189333	0.0184751	MAK16 homolog (S. cerevisiae)	Mak16
30406	1446100_at	36.4	41.8	38.3	32.6	27	25	-1.37707	-0.4616	0.0184854	transformation related protein 53 binding protein 1	Trp53bp1
40053	1455758_at	417	343.2	350.4	465.3	480.4	538.9	1.33675	0.418735	0.0185061	protein kinase C, gamma	Prkcg
16212	1431906_at	27.3	22	15.2	3.5	9.8	1.2	-4.44828	-2.15325	0.0185128	RIKEN cDNA 2700068H02 gene	2700068H02Rik
22229	1437923_at	237.6	213.9	287.7	341.2	320.3	339.7	1.35444	0.437694	0.0185348	expressed sequence AI314760 /// casein kinase 1, alpha 1	AI314760 /// Csnk1a1
28029	1443723_at	23.8	18.9	26	2.7	9.8	13.2	-2.67315	-1.41854	0.0185433	transient receptor potential cation channel, subfamily M, member 3	Trpm3
308	1415977_at	102.9	109.8	103.9	84.7	93	75.4	-1.25089	-0.322954	0.018551	myo-inositol 1-phosphate synthase A1	Isyna1
3251	1418920_at	44.4	28.1	37.4	13.5	19.1	4.7	-2.94638	-1.55894	0.0185633	claudin 15	Cldn15
38205	1453910_at	4.4	3.5	11.7	19.1	15.7	16.8	2.63265	1.39652	0.0185711	RIKEN cDNA 4930500A05 gene	4930500A05Rik
1131	1416800_at	180.2	167.4	161.7	197.6	199.9	187.8	1.14922	0.200661	0.0185717	transient receptor potential cation channel, subfamily M, member 7	Trpm7
3438	1419107_at	154.8	158.3	162.8	127.9	125.3	145.4	-1.19393	-0.255717	0.0185744	oligophrenin 1	Ophn1
44748	1460456_at	71.3	86	87.4	63	59.2	61.9	-1.32917	-0.410524	0.0185876	prolyl-tRNA synthetase domain containing 1	Prorsd1
935	1416604_at	1813.8	1719.2	1632.8	1444.3	1343.6	1525.7	-1.19756	-0.260099	0.0186439	cytochrome c-1	Cyc1
11644	1427338_at	140.5	197.6	224.3	81	82.9	103.2	-2.10558	-1.07422	0.0186563	ciliary rootlet coiled-coil, rootletin	Crocc
26702	1442396_at	27.7	15.9	24.9	10.9	2	4.8	-3.87006	-1.95235	0.0186605	RIKEN cDNA A730020M07 gene	A730020M07Rik
27785	1443479_at	18.2	13.4	18.2	1.6	8.6	8	-2.73626	-1.45221	0.0186749	/// predicted gene 14019	Gm14019 /// Gm14019
4029	1419698_at	16.9	18.5	13	2.5	8.3	8.4	-2.52083	-1.3339	0.0186781	chemokine (C-X-C motif) ligand 11	Cxcl11
20875	1436569_at	264.5	227	292.7	182.4	195.3	182.7	-1.39936	-0.484765	0.0186821	phosphatidylinositol-3,4,5-trisphosphate-dependent Rac exchange factor 2	Prex2
35337	1451042_a_at	201.8	226.3	201.4	176	174.5	153.8	-1.24826	-0.319924	0.0187156	myc induced nuclear antigen	Mina
33689	1449389_at	37.1	28	27.6	15.1	20.1	18.2	-1.73596	-0.79573	0.0187428	T cell acute lymphocytic leukemia 1	Tal1
8456	1424150_at	267.9	301.4	276.7	249.3	232.9	231.3	-1.1857	-0.245744	0.0187666	glycerophosphodiester phosphodiesterase domain containing 5	Gdpd5
11853	1427547_a_at	29.7	22.7	29.4	16.8	12.1	18.6	-1.72211	-0.784173	0.018838	solute carrier family 26, member 3	Slc26a3
21342	1437036_at	23	21.1	22.8	37.4	38.2	28.3	1.55306	0.635118	0.0188387	staphylococcal nuclease and tudor domain containing 1	Snd1
16506	1432200_at	27.2	19.8	15.2	4	1.9	9.2	-4.11921	-2.04237	0.01884	RIKEN cDNA C030044M21 gene	C030044M21Rik
37886	1453591_at	40.8	43.6	32.6	26.3	24.5	17.5	-1.71303	-0.776551	0.0188447	transmembrane protein 242	Tmem242
9969	1425663_at	34.6	28.6	26.9	18.5	1.7	3.9	-3.73859	-1.90249	0.0188503	interleukin 1 receptor antagonist	Il1rn
35081	1450786_x_at	59.3	47.6	59.1	72.5	77.5	68.8	1.31807	0.398429	0.0188963	PDZ and LIM domain 5	Pdlim5
12487	1428181_at	410.7	380.5	368.7	270.7	288	336	-1.29641	-0.374525	0.0189164	electron transferring flavoprotein, beta polypeptide	Etfb
5208	1420902_at	8.8	13.2	9.5	3.7	1	5.4	-3.11881	-1.641	0.0189319	ST6 (alpha-N-acetyl-neuraminyl-2,3-beta-galactosyl-1,3)-N-acetylgalactosaminide alpha-2,6-sialyltransferase 3	St6galnac3
10601	1426295_at	40.9	38.6	34.9	47.4	49.5	57.3	1.3479	0.430716	0.0189393	hyaluronan and proteoglycan link protein 1	Hapln1
10767	1426461_at	243	241.3	256.7	222.9	188.3	190.6	-1.23131	-0.300189	0.0189843	UDP-glucose pyrophosphorylase 2	Ugp2
19280	1434974_at	5.8	10.2	6.1	18.5	13.5	14.2	2.0905	1.06385	0.0190243	pyruvate dehydrogenase kinase, isoenzyme 1	Pdk1
34826	1450531_at	46.3	60	41.6	21.2	25.9	30.6	-1.90347	-0.928636	0.0190271	histocompatibility 2, blastocyst	H2-Bl
16701	1432395_at	4.8	5.7	7	1.8	1.3	3.6	-2.61194	-1.38512	0.0190358	RIKEN cDNA 1700039E15 gene	1700039E15Rik
2194	1417863_at	21.1	26.2	26.1	8.7	17.5	12.3	-1.90649	-0.930922	0.0190594	spermatogenesis associated 19	Spata19
39244	1454949_at	109	83.8	99.8	70.9	65.3	70.1	-1.41832	-0.504186	0.019079	ubiquitin specific peptidase 7	Usp7
12220	1427914_a_at	1584.8	1621.1	1575	1749.1	1717.2	1658.1	1.07185	0.100101	0.0190806	transcription elongation factor B (SIII), polypeptide 1	Tceb1
32373	1448070_at	25.9	12.3	23.2	4.7	5.3	3.7	-4.48175	-2.16406	0.0190881	exportin 1, CRM1 homolog (yeast)	Xpo1
36354	1452059_at	99.3	89	95.2	119.2	157.9	158.5	1.53651	0.619655	0.0191004	solute carrier family 35, member F5	Slc35f5
19334	1435028_at	1167	1197.4	1158.5	1283.4	1243.3	1227.8	1.06574	0.0918573	0.0191881	WD repeat domain 7	Wdr7
42428	1458133_at	131.8	145.1	142.1	125.2	121.1	124.6	-1.12968	-0.17592	0.0191968
18584	1434278_at	285.7	260.1	342.9	462.9	600.4	446.5	1.69889	0.764589	0.0192285	X-linked myotubular myopathy gene 1	Mtm1
18516	1434210_s_at	63.5	65.4	79.4	105.6	90.1	92.1	1.38166	0.466404	0.01923	leucine-rich repeats and immunoglobulin-like domains 1	Lrig1
35720	1451425_a_at	142.9	190.1	206.4	255.2	308	262.7	1.53115	0.614612	0.01925	makorin, ring finger protein, 1	Mkrn1
11986	1427680_a_at	229.6	219.2	216.4	160.6	151	195	-1.31307	-0.392941	0.0192637	nuclear factor I/B	Nfib
11648	1427342_at	116.3	98.7	100.7	129.2	124.1	134.9	1.22965	0.298246	0.0192861	FAST kinase domains 1	Fastkd1
7831	1423525_at	17.6	10.1	22.3	2.8	3.7	3	-5.26316	-2.39593	0.0192879	microtubule associated serine/threonine kinase-like	Mastl
40979	1456684_at	83.5	70.3	81.4	54.6	63	62.1	-1.30885	-0.388298	0.0193128	transmembrane protein 74	Tmem74
30262	1445956_at	2.9	7.2	6.4	15.8	10.9	12.2	2.35758	1.2373	0.0193486
25677	1441371_at	109.9	127.9	130.1	100.1	96.6	97.6	-1.25008	-0.322026	0.0193584	plexin A4	Plxna4
12751	1428445_at	197.5	212.1	185.7	163.2	137.8	163.9	-1.28049	-0.356696	0.0193837	Yip1 interacting factor homolog B (S. cerevisiae)	Yif1b
43337	1459042_at	4.8	20.5	4.1	41	38.1	27.3	3.61905	1.85561	0.0193891	regulating synaptic membrane exocytosis 3	Rims3
15844	1431538_at	31.1	32.7	38.7	26.2	25	23	-1.3814	-0.466133	0.0194065	RIKEN cDNA 4931415C17 gene	4931415C17Rik
11854	1427548_a_at	339.1	329.8	320.1	365.1	353.4	381.3	1.11203	0.153199	0.0194527	chloride channel, nucleotide-sensitive, 1A	Clns1a
14505	1430199_at	11.3	13.4	13.7	8.2	1.1	1.3	-3.62264	-1.85704	0.0194777	RIKEN cDNA 1700007E05 gene	1700007E05Rik
40767	1456472_at	15.7	17.4	17.8	20.2	23.5	25.1	1.35167	0.434743	0.0194861	armadillo repeat containing 4	Armc4
20935	1436629_at	39.6	54.3	50.5	24.4	29.4	33.1	-1.66168	-0.732643	0.0194997	transmembrane protein 91	Tmem91
8165	1423859_a_at	4145.9	3590.6	3746.4	2781	1924.8	2875	-1.51473	-0.599065	0.0195212	prostaglandin D2 synthase (brain)	Ptgds
6327	1422021_at	2.9	0.9	2.1	10.3	5.2	9.5	4.23729	2.08314	0.0195329	sprouty homolog 4 (Drosophila)	Spry4
15016	1430710_at	27	30	27.8	22.8	14.1	17.5	-1.55882	-0.640458	0.0195491
10535	1426229_s_at	75.4	66.3	61.7	46.5	29.8	47.6	-1.64165	-0.715143	0.0195769	v-Ki-ras2 Kirsten rat sarcoma viral oncogene homolog	Kras
30027	1445721_at	25.6	11.9	20.7	3.3	3.3	5.5	-4.80992	-2.26601	0.0195795	RIKEN cDNA A830021M18 gene	A830021M18Rik
33757	1449457_at	27.3	22.4	17.5	10	3.8	11.6	-2.64567	-1.40363	0.0196088	acyl-CoA thioesterase 12	Acot12
13523	1429217_at	56.6	64.4	59.7	47.8	46	52.7	-1.23345	-0.302696	0.0196222	zinc finger protein 655	Zfp655
26888	1442582_at	0.5	0.8	0.9	1.7	1.2	1.8	2.13636	1.09516	0.0196233	germinal center associated, signaling and motility	Gcsam
7787	1423481_at	129.7	119.1	125.7	90	110.7	96	-1.26222	-0.335961	0.019633	RIO kinase 2 (yeast)	Riok2
1169	1416838_at	413.4	423.4	443.2	229.7	278.7	353.4	-1.48526	-0.570719	0.0196729	methylmalonyl-Coenzyme A mutase	Mut
35436	1451141_at	208.4	231	209.5	155.5	143.9	185.8	-1.33739	-0.419417	0.0197027	methyltransferase like 8	Mettl8
32636	1448336_at	518.1	501.4	481.6	548.9	541.5	536.5	1.08381	0.116105	0.0197447	developmentally regulated GTP binding protein 1	Drg1
8689	1424383_at	77.6	70.2	67.5	61.3	50.7	50.3	-1.32656	-0.407685	0.0197911	transmembrane protein 51	Tmem51
23381	1439075_at	98.5	84.4	104.6	212	234.7	146.5	2.0633	1.04496	0.0197954	polymerase (RNA) III (DNA directed) polypeptide F	Polr3f
30846	1446540_at	210.7	209.1	375.2	46.6	60.6	63.7	-4.65184	-2.2178	0.0198033	uncharacterized LOC102636806	LOC102636806
42255	1457960_at	3	3.9	3.9	2.5	2.1	2.5	-1.52113	-0.60514	0.0198301
11763	1427457_a_at	37	27.4	28	17.9	20.5	17.3	-1.65889	-0.730216	0.0198324	bone morphogenetic protein 1	Bmp1
21499	1437193_s_at	388.8	372.4	345.3	446.3	415.4	422.3	1.16042	0.214642	0.0198975	small nuclear ribonucleoprotein B	Snrpb
13620	1429314_at	1708.3	1762.1	1742.6	1645.4	1686.3	1640.8	-1.04837	-0.0681425	0.0199046	synaptotagmin XI	Syt11
32440	1448140_at	64.6	54.7	64.7	45.9	50.3	42.3	-1.32852	-0.40982	0.0199365	cytokine induced apoptosis inhibitor 1	Ciapin1
10398	1426092_a_at	11.1	18.5	18.6	6.3	7.3	2.9	-2.92121	-1.54657	0.0199521	tripartite motif-containing 34A /// tripartite motif-containing 34B	Trim34a /// Trim34b
20832	1436526_at	253.6	261.2	235.2	276.3	283	292.7	1.136	0.183963	0.0199598	N-acetylglucosamine-1-phosphotransferase, gamma subunit	Gnptg
35979	1451684_a_at	114.7	109.3	117.5	91.4	103.7	89.5	-1.19993	-0.26295	0.0199696	bicaudal D homolog 1 (Drosophila)	Bicd1
1542	1417211_a_at	298.8	318.5	291.2	331.3	358.2	345.5	1.13924	0.188072	0.0199728	RIKEN cDNA 1110032A03 gene	1110032A03Rik
28382	1444076_at	54.6	57.1	47.3	41.3	30.5	25.7	-1.63077	-0.705553	0.0199893	zinc finger protein 81	Zfp81
15531	1431225_at	181.2	207.3	203.3	268.3	393.2	359.6	1.72541	0.786943	0.0199953
37290	1452995_at	37.9	36.2	29.8	7.4	23.2	6.7	-2.78552	-1.47795	0.0199988	nudix (nucleoside diphosphate linked moiety X)-type motif 17	Nudt17
20146	1435840_x_at	14.6	7.3	7.6	0.9	1.2	0.5	-11.3462	-3.50413	0.0200123	cDNA sequence BC147527	BC147527
5526	1421220_at	22.8	21.3	23.6	19.3	16.2	18.9	-1.24449	-0.315549	0.0200533	ankyrin repeat domain 17	Ankrd17
6490	1422184_a_at	310.8	296.2	322.8	266.5	246.2	279.1	-1.17429	-0.231784	0.020061	adenylate kinase 1	Ak1
2788	1418457_at	288.6	317.1	295.5	253.4	246.8	272.2	-1.16675	-0.222499	0.0200736	chemokine (C-X-C motif) ligand 14	Cxcl14
20255	1435949_at	8.3	9.6	8.7	7	6.1	7.4	-1.29756	-0.375802	0.0201184	zinc finger CCCH type containing 3	Zc3h3
13017	1428711_at	45.4	50.4	43.1	29.4	32.5	38.5	-1.38347	-0.468287	0.0201307	MON1 homolog b (yeast)	Mon1b
3688	1419357_at	84.1	86.5	88.1	78.8	76.7	69.7	-1.14876	-0.200073	0.0201367	ISY1 splicing factor homolog (S. cerevisiae)	Isy1
994	1416663_at	1441.4	1315.9	1333.2	1189.5	1200.7	1234.5	-1.12851	-0.174416	0.020149	NADH dehydrogenase (ubiquinone) 1 alpha subcomplex, 9	Ndufa9
40421	1456126_at	34.9	33.7	45.6	67.3	53.7	56.3	1.55254	0.63463	0.0201759	mucosa associated lymphoid tissue lymphoma translocation gene 1	Malt1
33300	1449000_at	619.3	596.7	631.9	534.5	490.6	562.2	-1.16418	-0.219312	0.0201859	DNA segment, Chr 10, Johns Hopkins University 81 expressed	D10Jhu81e
16083	1431777_a_at	541.2	635.3	610.2	500.7	466.4	485.3	-1.23017	-0.298859	0.0201975	high mobility group nucleosomal binding domain 3	Hmgn3
41045	1456750_at	20.9	29.9	34.9	5	14.2	11.4	-2.80065	-1.48576	0.0202221	RIKEN cDNA B230303O12 gene	B230303O12Rik
14054	1429748_at	38.7	36.7	41.9	50.5	44.9	52.5	1.26087	0.334419	0.0202472	RIKEN cDNA B930003M22 gene	B930003M22Rik
42565	1458270_at	22.8	15.7	18.8	11.1	1.3	0.7	-4.37405	-2.12897	0.0202665	potassium voltage gated channel, Shab-related subfamily, member 1	Kcnb1
38304	1454009_at	16.1	13.5	14.9	24.2	19.6	27.4	1.6	0.678072	0.0202715	RIKEN cDNA 1700008O03 gene	1700008O03Rik
43059	1458764_at	7.3	6.2	10.9	1.8	3.6	1.3	-3.64179	-1.86465	0.0202999
3888	1419557_a_at	174.3	173.1	154.4	144.5	141.6	131.8	-1.20077	-0.263955	0.0203289	transmembrane protein 9	Tmem9
22137	1437831_at	6.3	3.3	6.9	18.2	14.1	10.9	2.61818	1.38857	0.0203551	zinc finger, CCHC domain containing 4	Zcchc4
15469	1431163_at	107.6	93	105.7	84.8	85.8	84.2	-1.20212	-0.26558	0.0203587	RIKEN cDNA 2700046G09 gene	2700046G09Rik
36954	1452659_at	1109.8	1109.3	1154.6	1313.7	1450.2	1261.2	1.19308	0.254693	0.0203899	DEK oncogene (DNA binding)	Dek
25493	1441187_at	77.3	83.1	93.6	117.1	124.5	102.4	1.35433	0.43758	0.020423	RIKEN cDNA E330037M01 gene	E330037M01Rik
18526	1434220_at	164.8	162	164.2	221.3	188	233.3	1.30876	0.388198	0.0204391	nucleoporin 98	Nup98
33324	1449024_a_at	471.8	456.8	464.2	646.2	614.6	528.3	1.28453	0.361246	0.0204539	hexosaminidase A	Hexa
43555	1459260_at	2.1	3.6	2.8	10.2	6.2	12.1	3.35294	1.74543	0.0204687	predicted gene 13152 /// uncharacterized LOC102634244 /// zinc finger protein 468-like	Gm13152 /// LOC102634244 /// LOC102642631
30832	1446526_at	1.1	9.1	9	15.4	16.9	19.8	2.71354	1.44018	0.0204754	RIKEN cDNA 9330199F22 gene /// predicted gene 2379	9330199F22Rik /// Gm2379
25707	1441401_at	15.8	16.4	14.7	8.3	8.3	0.4	-2.75882	-1.46405	0.0204933	expressed sequence C79329	C79329
41090	1456795_at	102.4	97.9	126.5	141.2	141.4	143.6	1.30416	0.383123	0.020514	BEN domain containing 4	Bend4
34492	1450197_at	50.4	51.1	20.6	2.9	2.8	4.2	-12.3333	-3.62449	0.0205299	retinal pigment epithelium 65	Rpe65
16028	1431722_a_at	1.3	3.3	2	7.6	16.3	11.5	5.36364	2.42321	0.0205424	arylformamidase	Afmid
27546	1443240_at	19	32.1	27.5	13.8	7	3.7	-3.20816	-1.68175	0.0205658
36906	1452611_at	59.3	56.6	55.7	71.2	92.8	79	1.41608	0.501907	0.0205699	listerin E3 ubiquitin protein ligase 1	Ltn1
13224	1428918_at	132.8	123.7	137.6	110.2	116.2	101.2	-1.20299	-0.266626	0.020575	SCY1-like 3 (S. cerevisiae)	Scyl3
36543	1452248_at	155.8	164.9	158	211	198.6	178.6	1.22874	0.297185	0.0205874	pleckstrin homology domain containing, family G (with RhoGef domain) member 5	Plekhg5
38077	1453782_at	228.6	235.8	227.4	247.9	259.4	274.2	1.12966	0.175891	0.0205876	ankyrin repeat domain 33B	Ankrd33b
5828	1421522_at	28.8	22.3	20	15.3	10.9	12.1	-1.8564	-0.892505	0.0205886	beta-1,4-N-acetyl-galactosaminyl transferase 2	B4galnt2
19558	1435252_at	28.4	70.1	65.5	4.8	3	8.2	-10.25	-3.35755	0.020607	UDP-Gal:betaGal beta 1,3-galactosyltransferase, polypeptide 6	B3galt6
25418	1441112_at	84.1	106.8	98.1	72.3	72.2	70.6	-1.34356	-0.426062	0.0206075	zinc finger, BED domain containing 6	Zbed6
41010	1456715_at	174.6	184.2	198.1	144.5	162.9	153.3	-1.20881	-0.273591	0.0206804
29297	1444991_at	13.4	13.5	12.7	2.4	8.8	0.6	-3.35593	-1.74671	0.0207382
36096	1451801_at	1.9	2	1.6	0.6	0.5	1.3	-2.29167	-1.1964	0.0207407	triadin	Trdn
22691	1438385_s_at	313.9	353.9	305.1	377.7	402.1	430.1	1.2436	0.314524	0.0207457	glutamic pyruvate transaminase (alanine aminotransferase) 2	Gpt2
860	1416529_at	49.9	45.1	39.7	31.9	35.1	28.2	-1.41492	-0.500716	0.0208117	epithelial membrane protein 1	Emp1
35156	1450861_at	54.2	61.7	52.8	27.4	44.5	29.2	-1.66864	-0.738677	0.0208129	Fanconi anemia, complementation group C	Fancc
20236	1435930_at	304.5	307.6	290	330.4	318.3	334.8	1.09023	0.124638	0.0208229	S phase cyclin A-associated protein in the ER	Scaper
20454	1436148_at	160	151	166.8	214.3	224.5	283.4	1.51151	0.595992	0.0208303
17753	1433447_x_at	1351.1	1168	1335.4	1482.5	1511.4	1526.4	1.17273	0.229875	0.0208465	chaperonin containing Tcp1, subunit 4 (delta)	Cct4
1433	1417102_a_at	2036.3	2194.6	2146.6	1976.1	1840	1859.7	-1.12363	-0.168167	0.0208617	NADH dehydrogenase (ubiquinone) 1 beta subcomplex, 5	Ndufb5
5405	1421099_at	41	41.7	47.6	18	30.9	29.9	-1.65355	-0.72557	0.0208709	basic helix-loop-helix family, member e41	Bhlhe41
1682	1417351_a_at	499.4	519.3	472.5	438.6	452.8	425	-1.13279	-0.179876	0.0208766	small nuclear ribonucleoprotein polypeptide A'	Snrpa1
8265	1423959_at	22	19.4	21.2	15.6	12.6	7.8	-1.73889	-0.798166	0.0208848	ropporin 1-like	Ropn1l
33857	1449557_at	119.4	108.4	123.5	92	75.3	96.6	-1.33119	-0.412712	0.0209443	Yae1 domain containing 1	Yae1d1
39398	1455103_at	440.9	445.5	440.9	411.9	417	384.2	-1.09414	-0.129796	0.0209449	DEAD (Asp-Glu-Ala-Asp) box polypeptide 46	Ddx46
30941	1446635_at	16.7	22.3	15.9	5.5	11.3	3.1	-2.75879	-1.46404	0.0209556	DNA segment, Chr 13, ERATO Doi 476, expressed	D13Ertd476e
10755	1426449_a_at	743.8	790.7	747.9	816	836.6	869.6	1.10506	0.144131	0.0209709	praja ring finger 1, E3 ubiquitin protein ligase	Pja1
6791	1422485_at	421.6	381.5	404.4	517.1	564.6	466.1	1.28182	0.358196	0.0209745	SMAD family member 4	Smad4
23689	1439383_x_at	31.3	33.3	30	7.9	21.8	3.9	-2.81548	-1.49338	0.0209964	protein phosphatase 2A activator, regulatory subunit B	Ppp2r4
1889	1417558_at	526	519.6	510.4	575.6	602	550.5	1.1106	0.151345	0.0210006	Fyn proto-oncogene	Fyn
36956	1452661_at	489.2	500.6	446.7	384.5	405.4	424.5	-1.18289	-0.242314	0.0210067	transferrin receptor	Tfrc
35790	1451495_at	742	639.1	695.3	792.3	833	876.7	1.20497	0.268997	0.0210331	WW domain containing adaptor with coiled-coil	Wac
45005	1460713_at	60.8	60.6	46.2	33.5	40.7	34.2	-1.54613	-0.628657	0.0210426	2'-deoxynucleoside 5'-phosphate N-hydrolase 1	Dnph1
7923	1423617_at	215.9	230.8	222.4	258.5	238.6	255.3	1.1245	0.169278	0.0210435	peptide deformylase (mitochondrial)	Pdf
20805	1436499_at	337.6	376.8	371.1	438	404.2	453.4	1.19355	0.255261	0.0210598	sphingomyelin synthase 1	Sgms1
7728	1423422_at	5.4	17.7	15.9	27.6	26.9	27	2.08974	1.06333	0.0210609	ankyrin repeat and SOCS box-containing 4	Asb4
11227	1426921_at	79.8	93.7	108	131.6	159.1	129.5	1.49272	0.577941	0.0210673	ATP-binding cassette, sub-family F (GCN20), member 1	Abcf1
6400	1422094_a_at	236.5	267.4	253.8	290.2	309	285.4	1.16748	0.223398	0.0211212	zinc finger protein 329	Zfp329
5175	1420869_at	56.5	74.5	74	86.9	96.2	94.6	1.35463	0.437903	0.0211287	myeloid/lymphoid or mixed-lineage leukemia (trithorax homolog, Drosophila); translocated to, 10	Mllt10
28762	1444456_at	102.7	95.2	97.9	110.6	107.3	106.2	1.09567	0.131817	0.0211348	RIKEN cDNA 9030425P06 gene	9030425P06Rik
36775	1452480_at	12.4	19.7	18.1	2.1	4.7	9.4	-3.09877	-1.63169	0.0211552	RIKEN cDNA 4930529M08 gene	4930529M08Rik
21849	1437543_at	179.7	224.3	192.8	251.3	242.2	257.8	1.25888	0.332142	0.0211668	far upstream element (FUSE) binding protein 1	Fubp1
4886	1420580_at	87.5	87.7	83.4	78.1	78.8	71.4	-1.13272	-0.179791	0.0211768	RIKEN cDNA 4930429B21 gene	4930429B21Rik
44818	1460526_at	26.6	17.8	15.6	32.2	33.3	31.9	1.62333	0.698959	0.0211982	RIKEN cDNA 4833420L08 gene	4833420L08Rik
38245	1453950_a_at	1.5	3.4	3.9	8.1	9.2	14.4	3.60227	1.84891	0.0212539	X-ray repair complementing defective repair in Chinese hamster cells 2	Xrcc2
25213	1440907_at	8.4	7.3	9.2	5.5	5	2.5	-1.91538	-0.937634	0.0212801	histocompatibility 2, class II antigen E beta2	H2-Eb2
5720	1421414_a_at	72.8	96	91.6	59.1	59.7	62.4	-1.43709	-0.523146	0.0213228	sema domain, transmembrane domain (TM), and cytoplasmic domain, (semaphorin) 6A	Sema6a
3991	1419660_at	292.2	276.2	261.4	245.2	244.2	241.8	-1.13485	-0.182498	0.0213525	Yae1 domain containing 1	Yae1d1
13215	1428909_at	29.7	27.3	18.6	59.2	52.9	39	1.99868	0.999046	0.0213572	RIKEN cDNA A130040M12 gene	A130040M12Rik
9455	1425149_a_at	271.6	305.5	277.5	240.6	235.4	201.7	-1.26103	-0.334603	0.0213701	phosducin-like	Pdcl
39339	1455044_at	147.2	180.6	132.1	106.6	90.4	96.8	-1.56535	-0.646486	0.0213788	transmembrane protein 44	Tmem44
21023	1436717_x_at	6	11.8	11.1	0.7	4	0.8	-5.25455	-2.39357	0.0213796	hemoglobin Y, beta-like embryonic chain	Hbb-y
5587	1421281_at	942.5	861.1	887.1	755.9	821.5	755.9	-1.15317	-0.20561	0.0214102	gamma-aminobutyric acid (GABA) A receptor, subunit alpha 1	Gabra1
35274	1450979_at	0.8	0.5	1	5.8	4.9	10.4	9.17391	3.19754	0.0214686	carcinoembryonic antigen-related cell adhesion molecule 14	Ceacam14
19139	1434833_at	116.5	111.1	103.6	91.1	98.7	93.4	-1.16949	-0.225881	0.0214758	mitogen-activated protein kinase kinase kinase kinase 2	Map4k2
4373	1420054_s_at	64.6	65.5	62.8	54.8	52	41.8	-1.29812	-0.376419	0.0214871	solute carrier family 35, member C2	Slc35c2
27897	1443591_at	4.7	5.6	7.5	3.2	2.6	2.7	-2.09412	-1.06634	0.0214909	distal-less homeobox 4	Dlx4
34009	1449710_s_at	3271.3	3366.8	3045	2897.2	2879.4	2768.4	-1.13319	-0.180389	0.0215312	ATP synthase, H+ transporting, mitochondrial F1 complex, alpha subunit 1	Atp5a1
18761	1434455_at	118.7	181.6	172.1	79.9	91.2	53.3	-2.10517	-1.07394	0.0215317	F-box protein 44	Fbxo44
27980	1443674_at	5.1	6.1	9	11.6	16	18.7	2.29208	1.19666	0.0215712
6599	1422293_a_at	561.1	497.7	498.5	662.4	629.1	590.4	1.20844	0.273143	0.0215764	potassium channel tetramerisation domain containing 1	Kctd1
3188	1418857_at	15.1	20.5	32.2	3.8	2.9	5.2	-5.69748	-2.51032	0.0215786	solute carrier family 13 (sodium-dependent dicarboxylate transporter), member 2	Slc13a2
19453	1435147_x_at	340.6	336.4	368.6	304.6	312.8	313.1	-1.1237	-0.168253	0.021582	cell adhesion molecule 2	Cadm2
22545	1438239_at	22.5	35	35.7	14.9	15.9	8	-2.40206	-1.26427	0.0215929	midline 1	Mid1
41715	1457420_at	29.3	22.4	26.5	8.5	17.5	4.4	-2.57237	-1.3631	0.0216361	lemur tyrosine kinase 3	Lmtk3
883	1416552_at	46.9	34.4	50.4	28.4	21.8	24.2	-1.77016	-0.823881	0.0216695	developmental pluripotency associated 5A	Dppa5a
32078	1447772_at	27.3	39.8	19.8	9.6	6.8	4.6	-4.1381	-2.04897	0.0216762	pleckstrin homology domain-containing, family A (phosphoinositide binding specific) member 3	Plekha3
37160	1452865_at	45.9	73.7	76.2	3.4	20.4	32	-3.50896	-1.81104	0.0217275	leucine rich repeat containing 27	Lrrc27
27523	1443217_at	16	18.5	21.7	27.9	24.1	25.9	1.38612	0.471053	0.0217561	uncharacterized LOC102640749	LOC102640749
35773	1451478_at	5.7	8.9	4.8	19.1	20.8	12	2.67526	1.41968	0.0217789	angiopoietin-like 7	Angptl7
23507	1439201_at	199.4	230.1	199.8	178.2	154.9	150.3	-1.30182	-0.38053	0.0218547	ubiquitin specific peptidase 14	Usp14
1566	1417235_at	271.5	241.8	252.1	287.3	325.8	331.5	1.23413	0.30349	0.0218596	EH-domain containing 3	Ehd3
22960	1438654_x_at	927.6	855.4	976.4	1077.2	1034.5	1055	1.1476	0.198626	0.0218665	monocyte to macrophage differentiation-associated 2	Mmd2
5287	1420981_a_at	562.5	564.3	490.4	431.2	462.4	410.2	-1.24037	-0.310776	0.0219077	LIM domain only 4	Lmo4
18012	1433706_a_at	1964	1914.4	1843.9	2119.7	2064	2249.4	1.12422	0.168919	0.0219126	protein tyrosine phosphatase-like A domain containing 1	Ptplad1
29189	1444883_at	33.6	35.5	29.1	22.8	25.9	25.9	-1.31635	-0.396547	0.0219512	transmembrane protein 19	Tmem19
35243	1450948_a_at	64.8	58.7	61	67.4	71.9	74	1.1561	0.209263	0.0219527	mitochondrial ribosomal protein L1	Mrpl1
4476	1420157_s_at	352.5	377.7	337.5	463.3	406.6	486.2	1.27011	0.344957	0.0219548	ATP-binding cassette, sub-family F (GCN20), member 1	Abcf1
5144	1420838_at	745.3	713.5	780.4	903.4	893.4	814.6	1.16622	0.22184	0.0219689	neurotrophic tyrosine kinase, receptor, type 2	Ntrk2
10726	1426420_at	42.4	48.7	39	25	25.4	34.3	-1.53601	-0.619187	0.0219728	predicted gene 17066	Gm17066
12404	1428098_a_at	97.4	103.8	96.7	88.6	74.9	70.9	-1.2709	-0.345856	0.0219751	transmembrane 7 superfamily member 3	Tm7sf3
8278	1423972_at	295.6	318.7	329.8	266.7	284	266.4	-1.15543	-0.208427	0.0219786	electron transferring flavoprotein, alpha polypeptide	Etfa
23936	1439630_x_at	293.9	369.9	351.5	260.3	256.2	237.4	-1.34673	-0.429461	0.0220082	suprabasin	Sbsn
22172	1437866_at	36.6	28.9	49.6	74	63.8	59	1.70982	0.773842	0.0220102	dual specificity phosphatase 18	Dusp18
12215	1427909_at	1033.7	1072.9	1046.6	1004.9	945.5	935.9	-1.09247	-0.127595	0.0220416	RIKEN cDNA 2410015M20 gene	2410015M20Rik
44672	1460380_at	16.2	21.3	21.2	7.4	6.6	13.8	-2.11151	-1.07828	0.0220465	desmoglein 2	Dsg2
1557	1417226_at	180.6	176.1	147.1	217.1	211.5	250.5	1.34796	0.430773	0.0220621	F-box and WD-40 domain protein 4	Fbxw4
33150	1448850_a_at	785.9	740	677.4	877.1	834.7	859.7	1.16711	0.222944	0.0220669	DnaJ (Hsp40) homolog, subfamily C, member 5	Dnajc5
3268	1418937_at	359.7	285.1	215.2	418.2	512.4	473	1.63209	0.706723	0.0220877	deiodinase, iodothyronine, type II	Dio2
2837	1418506_a_at	2519.6	2129.9	2262.2	1956.2	1726.2	1751	-1.27208	-0.347185	0.0221115	peroxiredoxin 2	Prdx2
24719	1440413_at	44.6	35.1	40.4	20.7	30.8	24.8	-1.57405	-0.654481	0.0221131	von Willebrand factor C domain-containing protein 2-like	Vwc2l
16566	1432260_at	20.9	17.6	18.5	15.9	13.1	14	-1.32558	-0.406625	0.0221251	G protein-coupled receptor 39	Gpr39
31396	1447090_s_at	1771.5	1936.9	1746.2	1570.4	1578.2	1626.8	-1.14223	-0.191852	0.022134	ADP-ribosylation factor-like 1	Arl1
9262	1424956_at	72.5	72	81.2	87.7	84.6	89.6	1.16039	0.21461	0.0221421	AT hook, DNA binding motif, containing 1	Ahdc1
534	1416203_at	12.8	3.5	4.5	18	22.9	17.3	2.79808	1.48444	0.022149	aquaporin 1	Aqp1
6874	1422568_at	1209.7	1198.9	1148.7	1270.1	1250.7	1305.4	1.07559	0.10513	0.0221514	nuclear distribution gene E-like homolog 1 (A. nidulans)	Ndel1
33209	1448909_a_at	1025.9	1023.2	974	944.4	937.2	952	-1.06688	-0.0933926	0.0221579	mitochondrial ribosomal protein L39	Mrpl39
22023	1437717_x_at	737.1	719	770.6	840.9	1002.1	916.5	1.23928	0.3095	0.0222043	cadherin 11 pseudogene	2610005L07Rik
32706	1448406_at	965.7	833.9	1095.8	677.8	652.8	717.2	-1.41391	-0.499688	0.0222156	EP300 interacting inhibitor of differentiation 1	Eid1
2666	1418335_a_at	137.4	155.9	135.8	120.2	117.9	120.3	-1.19727	-0.259743	0.0222165	DPH1 homolog (S. cerevisiae) /// candidate tumor suppressor in ovarian cancer 2	Dph1 /// Ovca2
37095	1452800_a_at	644.3	671.2	718.5	525.3	603.8	563.6	-1.20163	-0.264993	0.0222232	apolipoprotein O	Apoo
4709	1420403_at	684	729.6	656.3	839.2	785.5	770.3	1.15706	0.210465	0.0222482	ATPase, Ca++ transporting, plasma membrane 2	Atp2b2
28794	1444488_at	207.1	228.7	233	195.2	192.5	179.8	-1.1785	-0.236954	0.0222531
41618	1457323_at	33.8	14.6	35.3	55.4	78.9	58	2.29749	1.20006	0.0222615	single-pass membrane protein with coiled-coil domains 3	Smco3
2028	1417697_at	49.3	44.7	51	99.9	68.5	79	1.70621	0.770793	0.0222769	sterol O-acyltransferase 1	Soat1
30594	1446288_at	99.5	81.5	83.6	108.6	108.7	109.1	1.23356	0.302828	0.02228	expressed sequence C78692	C78692
26950	1442644_at	31.1	37.2	27.7	17.1	19.6	23.3	-1.6	-0.678072	0.0222853	predicted gene 10523	Gm10523
14858	1430552_a_at	100.1	99.7	97.6	74.9	90.7	81.2	-1.20502	-0.269062	0.0223238	SET binding factor 1	Sbf1
22073	1437767_s_at	161.2	133.1	139.6	195.7	212	174.9	1.34271	0.425143	0.0223408	thymoma viral proto-oncogene 1 interacting protein	Aktip
33842	1449542_at	88.7	67.4	80	104.5	98	105.3	1.30368	0.382595	0.0223442	pre B cell leukemia homeobox 1	Pbx1
18982	1434676_at	595.6	578.8	587.5	636.4	607.2	624.3	1.06016	0.0842852	0.0223605	myotubularin related protein 9	Mtmr9
29974	1445668_at	47.6	69.7	55.5	24.2	27.9	37.8	-1.92214	-0.94271	0.0223657
44075	1459780_at	0.8	0.8	0.6	0.2	0.5	0.3	-2.2	-1.1375	0.0223942	transformation related protein 53	Trp53
24938	1440632_at	6.2	3.3	1.5	13.9	27.2	16.5	5.23636	2.38857	0.0224065	protocadherin beta 4	Pcdhb4
24301	1439995_at	23.3	30.1	34.3	19.3	15.8	14.5	-1.76815	-0.822237	0.0224082	solute carrier family 9, subfamily B (NHA2, cation proton antiporter 2), member 2	Slc9b2
24896	1440590_at	29.2	31.9	29.7	22.9	16.5	10	-1.83806	-0.878181	0.0224141
7507	1423201_at	1259	1190.6	1252.9	1305	1334.5	1317.6	1.06876	0.0959438	0.0224249	nuclear receptor co-repressor 1	Ncor1
42101	1457806_at	117.4	111.2	110.8	95.2	67.6	61.3	-1.5145	-0.598844	0.0224257	family with sequence similarity 196, member A	Fam196a
18093	1433787_at	89.9	101.9	96.4	81.9	62.4	72.2	-1.33118	-0.412703	0.0224614	NEL-like 1	Nell1
16185	1431879_at	15.1	14.3	18.3	3.4	10.3	8.2	-2.17808	-1.12306	0.0224809	RIKEN cDNA 9030417H13 gene	9030417H13Rik
14143	1429837_at	54	35	49.2	22.6	23.9	27.7	-1.86253	-0.897267	0.0225116	RIKEN cDNA 1700016D18 gene	1700016D18Rik
1638	1417307_at	210.5	196.8	229.6	179.8	170	178.7	-1.20511	-0.269163	0.0225156	dystrophin, muscular dystrophy	Dmd
5694	1421388_at	85.2	75.8	94.4	59.5	68.8	61.2	-1.34776	-0.430561	0.022536	myocyte enhancer factor 2D	Mef2d
27272	1442966_at	14	14.6	12.2	32.7	20.9	25.3	1.93382	0.951456	0.0225477
22441	1438135_at	18.4	18.3	17.6	13.1	14.8	9.6	-1.448	-0.534062	0.0225611
19577	1435271_at	36.9	36.3	50.1	25	25.9	21.2	-1.71012	-0.774102	0.0225633	interferon regulatory factor 3	Irf3
33232	1448932_at	4.3	7.9	5	17.2	11.3	20.7	2.86047	1.51625	0.0225864	keratin 16	Krt16
37138	1452843_at	243.2	272.7	249.5	197.4	224.7	186.4	-1.25785	-0.330957	0.0225888	interleukin 6 signal transducer	Il6st
20559	1436253_at	17.2	23.3	19.9	43	31.9	52.4	2.10762	1.07561	0.0226104	peroxisomal biogenesis factor 16	Pex16
42199	1457904_at	38	25.7	46.9	13.1	15.2	1.6	-3.699	-1.88713	0.0226329	carbonic anhydrase 8	Car8
2075	1417744_a_at	79.1	77.1	77.5	69.1	61.9	53.5	-1.26667	-0.341037	0.0226532	v-ral simian leukemia viral oncogene homolog B (ras related)	Ralb
15338	1431032_at	96.9	110.1	114.8	89.6	87.3	81.8	-1.24391	-0.314884	0.0226795	amylo-1,6-glucosidase, 4-alpha-glucanotransferase	Agl
17256	1432950_at	56.6	57.4	60.1	47.2	42.8	52.3	-1.22347	-0.290981	0.0226984	RIKEN cDNA 5330421F21 gene	5330421F21Rik
5781	1421475_at	2	4.3	3.5	17.7	10.3	23.4	5.2449	2.39091	0.0227552	membrane-spanning 4-domains, subfamily A, member 2	Ms4a2
33248	1448948_at	278	283.4	262.4	248.6	251.5	253.8	-1.09272	-0.127921	0.02277	solute carrier family 50 (sugar transporter), member 1	Slc50a1
17809	1433503_at	360.1	312.8	372.8	291.9	241	233.8	-1.3639	-0.447735	0.0227713	prostaglandin reductase 2	Ptgr2
35848	1451553_at	30.8	21.9	19.3	13.5	4.7	5.3	-3.06383	-1.61534	0.0227841	ADP-ribosyltransferase 5	Art5
29356	1445050_at	35.8	20.4	23.5	12.5	3.1	2.9	-4.30811	-2.10705	0.0227973	expressed sequence AU015247	AU015247
6565	1422259_a_at	39.7	55.6	43.4	29.8	27.6	29	-1.60532	-0.682865	0.0228158	chemokine (C-C motif) receptor 5	Ccr5
2516	1418185_at	527.9	532.9	554.2	483.5	489.4	434.2	-1.14775	-0.198809	0.022827	NADH dehydrogenase (ubiquinone) 1 alpha subcomplex, assembly factor 3	Ndufaf3
474	1416143_at	2887.9	2628.5	2586.4	2401.1	2328	2318.5	-1.14972	-0.201288	0.0228412	ATP synthase, H+ transporting, mitochondrial F0 complex, subunit F	Atp5j
25808	1441502_at	46.7	28.9	50.4	91.6	74.7	66.6	1.84841	0.886287	0.0228715
23723	1439417_at	2.7	2.6	5.7	12	7.2	11	2.74545	1.45705	0.0228936	quiescin Q6 sulfhydryl oxidase 1	Qsox1
21743	1437437_x_at	502.7	527.2	456.9	432.5	387.9	403.4	-1.2149	-0.280843	0.0229017	aspartyl aminopeptidase	Dnpep
6383	1422077_at	12.6	13.8	8.2	2.6	6.4	2	-3.14545	-1.65327	0.022915	acyl-CoA thioesterase 4	Acot4
30433	1446127_at	100.8	92	95.6	113.7	144.1	129.1	1.34154	0.42389	0.0229166	zinc finger E-box binding homeobox 1	Zeb1
18805	1434499_a_at	3028.3	3245.6	2969.4	2796.8	2688.4	2532.5	-1.15286	-0.20522	0.0229282	lactate dehydrogenase B	Ldhb
21063	1436757_a_at	5880.2	6294.8	5522.6	4937.5	4815	5218.4	-1.18213	-0.241393	0.0229282	cytochrome c oxidase, subunit VIb polypeptide 1	Cox6b1
12302	1427996_at	49	49	48.5	31	41.5	39.4	-1.3092	-0.388691	0.0229504	cDNA sequence BC028528	BC028528
20437	1436131_at	120.7	126	109.6	62.8	69.8	97.7	-1.54711	-0.629578	0.0229918	sialic acid binding Ig-like lectin H	Siglech
28118	1443812_x_at	12	13.6	11.4	16.9	17.2	14.5	1.31351	0.393431	0.0229948
13046	1428740_a_at	100.6	102.8	107.6	92.2	73.7	72	-1.30727	-0.386559	0.0229985	phosphatidylinositol glycan anchor biosynthesis, class T	Pigt
7236	1422930_at	12.2	2.2	1.6	16.8	20.3	17.6	3.41875	1.77347	0.0230387	intercellular adhesion molecule 4, Landsteiner-Wiener blood group	Icam4
34985	1450690_at	1055.7	1087.1	1049.1	1415.9	1329	1184.3	1.23099	0.29982	0.0230678	RAN binding protein 2	Ranbp2
9436	1425130_a_at	305.9	369.3	317.9	185	238.6	257	-1.45915	-0.545132	0.0230748	protein tyrosine phosphatase, non-receptor type 5	Ptpn5
20230	1435924_at	46	35.7	53.7	28.2	20.2	25.5	-1.83221	-0.873581	0.0230761	transcription factor B1, mitochondrial	Tfb1m
43590	1459295_at	21.9	12.8	20.2	26.7	30.7	31.3	1.61566	0.692128	0.0231058
7304	1422998_a_at	662.4	618.8	603.5	572.5	544.4	522.2	-1.14984	-0.201431	0.0231833	glutaredoxin 2 (thioltransferase)	Glrx2
2077	1417746_at	2527.2	2211	2122.9	1759.8	1915.7	1718.5	-1.27199	-0.347084	0.0231921	complexin 1	Cplx1
40733	1456438_x_at	1522.1	1468.3	1457	1593.7	1652.5	1756.9	1.12495	0.16986	0.0232158	ribophorin I	Rpn1
26258	1441952_x_at	1588.2	1599.3	1322.8	1234.2	1084.7	1072.8	-1.32981	-0.411215	0.0232235	Ly6/neurotoxin 1	Lynx1
3262	1418931_at	27.9	17.3	21.9	10.1	7.8	12.8	-2.18567	-1.12807	0.0232286	regenerating islet-derived family, member 4	Reg4
12003	1427697_a_at	29.1	28.5	27.9	2.6	18.7	13.3	-2.4711	-1.30515	0.023234	transformation related protein 73	Trp73
22627	1438321_x_at	180.5	190.6	163.9	149.3	151.8	150	-1.18599	-0.246092	0.0232342	family with sequence similarity 63, member A	Fam63a
31260	1446954_at	5.1	6.3	3	14.2	23.3	31.5	4.79167	2.26053	0.023237
26842	1442536_at	65.4	52.4	51.7	89.6	76.9	73.7	1.41711	0.502951	0.0232392	RIKEN cDNA 6430590A07 gene	6430590A07Rik
22179	1437873_at	228.8	250.7	251.2	208.9	151.4	153.6	-1.42187	-0.507792	0.023249	zinc finger protein 799	Zfp799
5317	1421011_at	142.7	123.2	121.7	99.1	104.4	107.2	-1.24751	-0.319046	0.0232569	hydroxysteroid (17-beta) dehydrogenase 11	Hsd17b11
41832	1457537_at	18.9	28.3	29.1	12.9	12	15	-1.91228	-0.935294	0.0232573	RAB1, member RAS oncogene family	Rab1
35763	1451468_s_at	135.4	137.3	128.6	118.2	102.6	118.1	-1.18413	-0.243822	0.0232615	exportin 5	Xpo5
36444	1452149_at	244.9	254	235	222.9	207	222.6	-1.12475	-0.169606	0.0233146	ubiquitin protein ligase E3B	Ube3b
44954	1460662_at	32.8	30.7	21.5	3.6	13.5	14.8	-2.66458	-1.41391	0.0233261	period circadian clock 3	Per3
31209	1446903_at	17.8	20.9	9.2	2.3	2.5	4.7	-5.04211	-2.33403	0.023328
19931	1435625_at	37	38.1	32.1	30.2	27.4	27.6	-1.25822	-0.33138	0.0233306	ectonucleoside triphosphate diphosphohydrolase 7	Entpd7
14651	1430345_at	48.9	48	57.9	13.3	34.7	29.7	-1.99228	-0.994419	0.0233321	RIKEN cDNA 5530402H23 gene	5530402H23Rik
24318	1440012_at	73.8	78.5	62.9	52.3	52.3	57.6	-1.32676	-0.407904	0.0233449
13057	1428751_at	203.4	182.3	226.8	254.1	244.6	264	1.24522	0.316406	0.0233483	PARK2 co-regulated	Pacrg
1964	1417633_at	28.2	29.2	42.3	15.4	15.7	3.4	-2.88986	-1.531	0.0233591	superoxide dismutase 3, extracellular	Sod3
421	1416090_at	1843.5	1748.5	1824.6	1531.8	1621.6	1687.8	-1.11885	-0.162023	0.0233759	pyruvate dehydrogenase (lipoamide) beta	Pdhb
22764	1438458_a_at	545.3	482.6	558.1	706.1	706.3	607	1.27327	0.348534	0.0233764	splicing factor proline/glutamine rich (polypyrimidine tract binding protein associated)	Sfpq
19947	1435641_at	207.5	203.2	211.5	237.6	249	222.3	1.13934	0.188204	0.0233988	mannoside acetylglucosaminyltransferase 4, isoenzyme A	Mgat4a
11118	1426812_a_at	123.4	114.6	133.6	95.3	94.8	107.6	-1.24824	-0.319891	0.0234131	family with sequence similarity 129, member B	Fam129b
22311	1438005_at	161.2	129.4	136	112.2	98.9	103.8	-1.35472	-0.43799	0.0234398	solute carrier family 25, member 40	Slc25a40
42279	1457984_at	55.4	57.2	102.7	122.8	132.5	155.6	1.9085	0.932439	0.0234408	corticotropin releasing hormone	Crh
14331	1430025_at	14.1	16.9	18.5	2.1	1.9	10.9	-3.32215	-1.73212	0.0234503	protein phosphatase 3, catalytic subunit, gamma isoform	Ppp3cc
7744	1423438_at	149.5	172	170.7	123.2	102.4	136	-1.36117	-0.44485	0.0234629	kaptin	Kptn
3248	1418917_at	6.8	12.6	1.5	18.9	20	28	3.20096	1.6785	0.0234776	heme binding protein 2	Hebp2
9826	1425520_a_at	87.5	67.4	88.9	29.3	55	48.5	-1.83584	-0.876443	0.023494	dehydrodolichyl diphosphate synthase	Dhdds
34890	1450595_at	14.5	15.1	15.1	11.6	7.1	10.9	-1.51014	-0.594678	0.0235004	vomeronasal 1 receptor 10 /// vomeronasal 1 receptor 9	Vmn1r10 /// Vmn1r9
426	1416095_x_at	581.3	536.3	580.8	616.2	618.8	635.6	1.10139	0.139325	0.0235169	SAP domain containing ribonucleoprotein	Sarnp
29964	1445658_at	1.5	3.8	6.8	29.2	42.2	17.8	7.3719	2.88204	0.0235308
17861	1433555_at	103.9	103.8	107.6	132.9	130.2	114.6	1.19791	0.260516	0.0235378	ELL associated factor 1	Eaf1
17452	1433146_at	2.8	2.9	3.5	13.9	15.6	7.2	3.98913	1.99607	0.0235411
39257	1454962_at	307.6	297.7	315.5	336.4	337	366.3	1.12913	0.175208	0.0235717	spire homolog 1 (Drosophila)	Spire1
2022	1417691_at	146.5	147.9	169.5	128.2	113.7	127.7	-1.25514	-0.327849	0.0236051	bridging integrator 3	Bin3
36237	1451942_x_at	13.2	21	25.9	9	2.2	3.7	-4.03356	-2.01205	0.0236224	killer cell lectin-like receptor subfamily A, member 20	Klra20
20151	1435845_at	207.7	231.3	228.5	277.5	261.8	248.3	1.17993	0.238695	0.0236289
7540	1423234_at	299.4	256.3	274.1	314.9	348.6	355.9	1.22849	0.296885	0.023663	proteasome (prosome, macropain) 26S subunit, non-ATPase, 5	Psmd5
10275	1425969_a_at	103.7	87	75.5	132	113.4	125.8	1.39444	0.479686	0.0236878	huntingtin	Htt
37173	1452878_at	1300.5	1271.2	1250.9	1433.1	1355.4	1497.1	1.12112	0.164943	0.0237126	protein kinase C, epsilon	Prkce
3462	1419131_at	3.4	6	3.4	0.7	1.4	1.2	-3.87879	-1.95561	0.0237389	coagulation factor XIII, beta subunit	F13b
36212	1451917_a_at	211.2	197.5	179	232.5	257.8	232	1.22903	0.297518	0.0237668	doublecortin-like kinase 1	Dclk1
28585	1444279_at	27.7	27	39.1	71.5	65.4	46.7	1.95736	0.968906	0.0237704	HECT, UBA and WWE domain containing 1	Huwe1
19478	1435172_at	22.9	27.5	38.3	12.1	15.2	10.9	-2.32199	-1.21536	0.0237778	eomesodermin homolog (Xenopus laevis)	Eomes
3716	1419385_a_at	251.9	292.2	284.8	314.1	326.1	331.2	1.17191	0.228867	0.0238116	ubiquilin 1	Ubqln1
28688	1444382_at	12	15.3	14.5	21.7	23.8	17.8	1.51435	0.598703	0.0238201	nuclear protein transcriptional regulator 1 like	Nupr1l
1824	1417493_at	491.6	451.7	533.7	572.7	573.2	594.2	1.17813	0.2365	0.0238212	Bmi1 polycomb ring finger oncogene	Bmi1
26073	1441767_at	16.7	44.8	31.8	55	74.5	74.4	2.18542	1.12791	0.0238373	zinc finger protein 142	Zfp142
22334	1438028_at	115.6	127.3	119.6	136.9	152.2	137.7	1.17738	0.235579	0.0238577	regulation of nuclear pre-mRNA domain containing 2	Rprd2
3971	1419640_at	555.7	594.2	568.3	534.8	530.3	531.7	-1.07603	-0.105714	0.0238756	purine rich element binding protein B	Purb
1317	1416986_a_at	180.1	150.3	161.6	204.7	190.7	214.3	1.23923	0.309441	0.023878	signal-regulatory protein alpha	Sirpa
7232	1422926_at	2	1.2	1.6	7.8	7.4	3.7	3.9375	1.97728	0.0238817	melanocortin 2 receptor	Mc2r
21664	1437358_at	116.3	299	162	452.4	553.3	374.4	2.39061	1.25738	0.023883	WD repeat and FYVE domain containing 1	Wdfy1
21008	1436702_at	229.2	223.8	212.9	200.2	207	203.6	-1.09021	-0.124605	0.0238938	N-acetyltransferase 8-like	Nat8l
27512	1443206_at	20.8	32	31.1	13.8	15.9	15.4	-1.86031	-0.895543	0.0239016
30250	1445944_at	32.5	40.5	46.6	27	19.5	23.9	-1.69886	-0.76457	0.023906
12776	1428470_at	207.8	185.8	207.1	222.9	238.1	229.6	1.14966	0.201206	0.0239097	exocyst complex component 2	Exoc2
24100	1439794_at	98.7	85.7	99.3	53.3	77.9	53.2	-1.5385	-0.621527	0.0239134	netrin 4	Ntn4
11190	1426884_at	742.9	761.7	709.1	786.7	826.2	843.9	1.10982	0.150321	0.0239172	required for meiotic nuclear division 5 homolog A (S. cerevisiae)	Rmnd5a
1021	1416690_at	205.6	219.7	213.4	148.7	189.7	148.7	-1.31123	-0.39092	0.0239447	GTP binding protein 2	Gtpbp2
16064	1431758_at	21.8	15.5	25.6	10.5	9.7	11.1	-2.00958	-1.0069	0.0239495	cDNA sequence BC051628	BC051628
18504	1434198_at	27	24	20.4	17.9	15.3	16.4	-1.43952	-0.525584	0.0239597	ATPase inhibitory factor 1	Atpif1
44887	1460595_at	156.8	162	175.7	194.2	201.6	182.6	1.16967	0.226097	0.0239735	synaptotagmin XIV	Syt14
28799	1444493_at	167.3	173	139.6	118.3	127.4	105.5	-1.36646	-0.450441	0.0239858
12596	1428290_at	182.6	182.8	168.9	145.3	163.4	146.1	-1.1748	-0.232418	0.0240055	mitochondrial intermediate peptidase	Mipep
27763	1443457_at	41.1	46.1	65	25.5	20.5	26.5	-2.09931	-1.06992	0.0240756	RIKEN cDNA A230055J12 gene	A230055J12Rik
23104	1438798_at	62.4	68.6	74.5	58.1	48.7	47.9	-1.32838	-0.409665	0.0240913	RIKEN cDNA 4931406P16 gene	4931406P16Rik
22030	1437724_x_at	1107.1	1074.1	1128.9	1163.8	1178.8	1224.5	1.07764	0.107877	0.0241007	phosphatidylinositol transfer protein, membrane-associated 1	Pitpnm1
25871	1441565_at	20.1	16	34.2	43	50.1	41.8	1.91892	0.940294	0.024104
8627	1424321_at	90.8	79.3	81.7	70.9	52.3	60.5	-1.37071	-0.454927	0.0241185	replication factor C (activator 1) 4	Rfc4
23471	1439165_at	29.1	46	45.3	18.7	18.5	22.8	-2.00667	-1.0048	0.0241216	predicted gene, 20199	Gm20199
35458	1451163_at	95	92.9	98.6	75.6	79.3	88.2	-1.17853	-0.236985	0.0241293	Terf1 (TRF1)-interacting nuclear factor 2	Tinf2
9058	1424752_x_at	229.7	245.8	228.6	208.8	218.1	204.5	-1.11514	-0.157226	0.0241352	zinc finger protein 65 /// zinc finger protein 738	Zfp65 /// Zfp738
17025	1432719_at	106.5	126.7	107.2	78.6	82.5	93.9	-1.3349	-0.416734	0.0241474	RIKEN cDNA 4833412K13 gene	4833412K13Rik
39871	1455576_at	33.1	29.4	27.3	37.3	35.9	41.2	1.27394	0.3493	0.0241792	Ras and Rab interactor-like	Rinl
35932	1451637_a_at	3.8	2	1	8.5	5.4	6.1	2.94118	1.55639	0.0241949	proline rich, lacrimal 1	Prol1
30377	1446071_at	46.1	41.2	42.1	24.4	36	30.1	-1.42983	-0.515848	0.0241999	six transmembrane epithelial antigen of prostate 2	Steap2
20085	1435779_at	34.4	40.7	43.7	60.8	48.9	55.7	1.39226	0.477424	0.0242859	centriolin	Cntrl
33723	1449423_at	153.6	142.5	160.1	173.5	190	206.1	1.24858	0.320283	0.0243324	microtubule associated serine/threonine kinase 1	Mast1
8628	1424322_at	5.4	14.4	3.4	28.7	22.9	18.7	3.03017	1.5994	0.0243627	apurinic/apyrimidinic endonuclease 2	Apex2
28663	1444357_at	46.8	43.7	47.6	32.9	41.1	33.5	-1.28465	-0.361377	0.0243671	A kinase (PRKA) anchor protein 6	Akap6
234	1415903_at	350.3	266.4	256.3	408.9	388.8	396.2	1.36758	0.451628	0.0243922	solute carrier family 38, member 1	Slc38a1
26604	1442298_at	67.8	59.3	58.6	43.6	52.9	46.6	-1.29769	-0.37595	0.024401
1198	1416867_at	108.6	96.4	109.9	88	85.6	91.9	-1.18606	-0.246182	0.0244036	blocked early in transport 1 homolog (S. cerevisiae)	Bet1
1802	1417471_s_at	404.1	327	370.6	268.4	296.1	286.3	-1.2949	-0.372839	0.0244124	DNA segment, Chr 1, ERATO Doi 622, expressed	D1Ertd622e
35245	1450950_at	283.6	277.3	257.7	304	301.3	297.8	1.10323	0.141727	0.0244532	structural maintenance of chromosomes 3	Smc3
36294	1451999_at	41.2	39.1	40.1	33.5	26.6	34.1	-1.27813	-0.354036	0.0244634	LIM domain binding 3	Ldb3
25983	1441677_at	25.9	25	24.4	23.5	23	23.7	-1.07265	-0.101179	0.0244647
9037	1424731_at	39.4	47.5	44.8	56	51.9	60.8	1.28094	0.357205	0.0244751	notchless homolog 1 (Drosophila)	Nle1
8693	1424387_at	30.9	16.8	25.4	8.8	7.7	11.6	-2.60142	-1.3793	0.0244993	prolactin family 8, subfamily a, member 81	Prl8a8
25102	1440796_at	27.1	31.4	30.4	19	23.6	24.2	-1.33084	-0.412335	0.0245009	RIKEN cDNA A330021E22 gene	A330021E22Rik
6656	1422350_at	8.2	9	9	15.1	11.9	18	1.71756	0.780358	0.0245109	formyl peptide receptor, related sequence 3	Fpr-rs3
1375	1417044_at	595.5	644.5	581.3	667.6	741.8	719.4	1.16884	0.225072	0.0245129	leucine carboxyl methyltransferase 1	Lcmt1
304	1415973_at	1034.8	1238.9	1113.8	954.1	874.6	854	-1.26272	-0.336535	0.0245133	myristoylated alanine rich protein kinase C substrate	Marcks
21200	1436894_at	36.4	34.5	29.7	42.7	53.8	59	1.54573	0.628284	0.0245277	immunoglobulin-like domain containing receptor 2	Ildr2
7331	1423025_a_at	946.4	794.9	880.6	1019.3	1024.8	1067.7	1.18685	0.247137	0.02455	predicted gene, 21949 /// schwannomin interacting protein 1	Gm21949 /// Schip1
13712	1429406_at	1.8	12.9	12.7	25.9	19.8	26	2.61679	1.3878	0.0245659	solute carrier organic anion transporter family, member 6c1	Slco6c1
37295	1453000_at	616.5	628.6	619.8	655.1	699.4	661.3	1.08092	0.112254	0.024574	calmodulin regulated spectrin-associated protein family, member 2	Camsap2
21147	1436841_at	370.6	370	395.6	233.3	322.9	290.1	-1.34255	-0.424976	0.0245798	family with sequence similarity 63, member B	Fam63b
41381	1457086_at	9.7	13.2	16.2	18.8	25.5	25.3	1.78005	0.831919	0.0245855	RIKEN cDNA D930028M14 gene	D930028M14Rik
13757	1429451_at	257	255.9	267.9	211.9	231.8	240.1	-1.14185	-0.191379	0.0245883	RIKEN cDNA 2610301B20 gene	2610301B20Rik
3595	1419264_at	61.8	63	65.2	84.4	72.8	73.6	1.21474	0.280644	0.024592	POC5 centriolar protein homolog (Chlamydomonas)	Poc5
23061	1438755_at	100	75.4	102.9	65.6	53.8	60.2	-1.54955	-0.631854	0.0246162	expressed sequence C80068	C80068
7762	1423456_at	209.1	223.3	195.2	130	133.9	178.6	-1.41831	-0.504168	0.0246561	basic leucine zipper and W2 domains 2	Bzw2
36055	1451760_s_at	55.3	47.7	46.3	39.6	39.4	40.6	-1.24833	-0.319997	0.0246732	RIKEN cDNA 2010001E11 gene /// expressed sequence AI317395	2010001E11Rik /// AI317395
37222	1452927_x_at	3102.6	3078.3	2916.4	2755.6	2554.8	2793.5	-1.12258	-0.166822	0.0246735	triosephosphate isomerase 1	Tpi1
31476	1447170_at	0.6	0.7	0.4	1.5	3.1	2.1	3.94118	1.97863	0.0246873
2884	1418553_at	259.1	238	230.5	274.2	270.4	286.3	1.14197	0.191529	0.0246901	rho/rac guanine nucleotide exchange factor (GEF) 18	Arhgef18
12831	1428525_at	1223.4	1349.5	1366.4	1063	1000.4	1170.3	-1.2182	-0.284753	0.0247258	RIKEN cDNA 4930488B01 gene /// PNMA-like 1	4930488B01Rik /// Pnmal1
4057	1419726_at	5.9	10.4	7.9	16.6	12.4	14	1.77686	0.82933	0.0247291	a disintegrin and metallopeptidase domain 18	Adam18
40636	1456341_a_at	6140.5	5806.9	5308.5	7174.1	6466.8	7197.8	1.20763	0.272176	0.0247337	Kruppel-like factor 9	Klf9
17497	1433191_at	16	12.8	7	1.2	1.2	4	-5.59375	-2.48382	0.0247397	RIKEN cDNA A430105P17 gene	A430105P17Rik
21856	1437550_at	243.6	261.5	263.2	227.9	215.8	235.4	-1.13135	-0.178046	0.0247516	DEAH (Asp-Glu-Ala-His) box polypeptide 36	Dhx36
22981	1438675_at	173.6	165.9	179.5	139.5	149.3	158.7	-1.15978	-0.213847	0.0247755	splicing factor, suppressor of white-apricot homolog (Drosophila)	Sfswap
25860	1441554_at	57.5	47.9	48.3	40.8	34.6	39.7	-1.33536	-0.417229	0.0247926	chondroitin sulfate synthase 3	Chsy3
37722	1453427_at	40.2	30.3	36.4	45.3	47.2	45.4	1.28999	0.367361	0.0248012	casein kinase 2, alpha 1 polypeptide	Csnk2a1
29878	1445572_at	18.5	21.7	19.8	13	9.8	16	-1.54639	-0.628906	0.0248113	RIKEN cDNA A530084C06 gene	A530084C06Rik
41400	1457105_at	34.2	32.2	33.8	15.2	26.4	23.1	-1.54869	-0.631045	0.0248396	polycystic kidney disease 2-like 1	Pkd2l1
22980	1438674_a_at	140.9	144.4	133	105	123.3	120.5	-1.19925	-0.262138	0.0248455	splicing factor, suppressor of white-apricot homolog (Drosophila)	Sfswap
40321	1456026_at	83.2	90.2	76	50.8	48.3	69.1	-1.48276	-0.568284	0.0248881	NHL repeat containing 3	Nhlrc3
12674	1428368_at	637.2	775.5	779.4	871.1	934.2	981.5	1.27129	0.346296	0.0249155	Rho GTPase activating protein 21	Arhgap21
596	1416265_at	71	79.3	73.4	65.5	64.8	66.8	-1.13496	-0.182637	0.0249372	calpain 10	Capn10
42162	1457867_at	342.5	283.4	280.7	238.2	227.2	202.7	-1.35698	-0.440402	0.0249554	sphingosine-1-phosphate phosphotase 2	Sgpp2
42440	1458145_at	73.1	67.9	69.4	127.7	99.6	93.9	1.52662	0.610337	0.0249586	RAR-related orphan receptor alpha	Rora
35975	1451680_at	189.3	184.1	201.4	207.8	226.8	229.1	1.15466	0.207471	0.0249696	sulfiredoxin 1 homolog (S. cerevisiae)	Srxn1
39763	1455468_at	280.8	257.9	317.8	348.5	350.1	342.5	1.21553	0.281583	0.0249964	dpy-19-like 3 (C. elegans)	Dpy19l3
31763	1447457_at	12.2	11.5	8.3	21.2	15.5	17.1	1.68125	0.749534	0.0250029	uncharacterized LOC102639518	LOC102639518
31953	1447647_at	66.1	58.1	73.8	33.3	45.3	49.6	-1.54446	-0.627104	0.0250215	wingless-type MMTV integration site family, member 7A	Wnt7a
31896	1447590_at	13.9	22.8	21.5	7.7	11.1	8.3	-2.1476	-1.10273	0.0250232
7249	1422943_a_at	160.4	150.6	123.6	192.3	239.4	197.3	1.44731	0.533372	0.0250567	heat shock protein 1	Hspb1
896	1416565_at	3060.8	2771.8	2776.1	2426.9	2448	2592.8	-1.15279	-0.205131	0.0250776	cytochrome c oxidase, subunit VIb polypeptide 1	Cox6b1
38903	1454608_x_at	1264.4	1543.4	2192.9	3659.7	2597.4	3061.7	1.8635	0.898014	0.0251456	transthyretin	Ttr
39687	1455392_at	302.7	296.6	241.4	187.3	208.6	218.8	-1.36766	-0.451709	0.0251472	proline rich 18	Prr18
24718	1440412_at	89.4	93.4	81.6	121.4	105.2	105.1	1.25454	0.327157	0.0251496
22548	1438242_at	64	63.3	68.5	56.9	60.6	57.3	-1.12014	-0.163676	0.0251815	ubiquitin specific peptidase 40	Usp40
25231	1440925_at	84.1	82.9	75.3	100.7	90.2	94.4	1.17747	0.235685	0.0252028	predicted gene, 19773	Gm19773
32987	1448687_at	129.8	150.8	136.4	120.6	107.3	112.7	-1.22431	-0.291969	0.0252033	family with sequence similarity 132, member A	Fam132a
7962	1423656_x_at	130.4	145.5	157.3	116.3	119.5	106.9	-1.26408	-0.338087	0.0252223	CTS telomere maintenance complex component 1	Ctc1
30682	1446376_at	71.1	66.9	58.6	47.8	49.2	32.9	-1.51347	-0.597862	0.0252275	ribosomal protein S6 kinase, polypeptide 1	Rps6kb1
4215	1419896_at	32	40.8	39.4	21	28	26.8	-1.48021	-0.565803	0.025247	tet methylcytosine dioxygenase 1	Tet1
25095	1440789_at	37	41.9	50.9	63.1	71.3	56.7	1.47227	0.558037	0.0252879	neogenin	Neo1
15241	1430935_at	16.8	3	8.2	22.2	24.7	30.7	2.77143	1.47063	0.0253176	RIKEN cDNA 4933413G19 gene	4933413G19Rik
7466	1423160_at	778.2	570.9	628.7	863.9	1008.9	896.5	1.40019	0.485625	0.0253232	sprouty protein with EVH-1 domain 1, related sequence	Spred1
15295	1430989_a_at	97.4	103.8	111.8	91.1	78.1	73.3	-1.29072	-0.368178	0.0253704	RIKEN cDNA 1700020I14 gene	1700020I14Rik
27175	1442869_at	34.1	29	30.4	23.4	26.7	24.6	-1.25167	-0.323858	0.0253728	docking protein 7	Dok7
10825	1426519_at	151.9	118.4	121.7	226.2	247.3	173.4	1.65026	0.722689	0.0253862	procollagen-proline, 2-oxoglutarate 4-dioxygenase (proline 4-hydroxylase), alpha 1 polypeptide	P4ha1
13295	1428989_at	144.6	141.6	128.7	64.1	88.1	111.4	-1.57398	-0.654413	0.0253933	RIKEN cDNA 0710001D07 gene	0710001D07Rik
21249	1436943_at	76.7	81.1	65.5	26.9	47.9	52.7	-1.75137	-0.808486	0.0254096	cytochrome b5 domain containing 2	Cyb5d2
23186	1438880_at	32.8	12.4	20.7	40.4	63.6	63.8	2.54628	1.34839	0.0254099	RIKEN cDNA 1700012D14 gene	1700012D14Rik
1301	1416970_a_at	6823.8	6913.5	6268.6	5481.4	5521.9	6083.1	-1.17087	-0.227577	0.0254428	cytochrome c oxidase subunit VIIa 2	Cox7a2
26269	1441963_at	1410.6	1637	1465.7	1827	1831.1	1698.5	1.18685	0.247135	0.0254555	leucine zipper, putative tumor suppressor family member 3	Lzts3
40183	1455888_at	48.1	48	56.3	68.5	93.5	104.1	1.74606	0.804106	0.0254626	leucine rich repeat and Ig domain containing 2	Lingo2
26812	1442506_at	25.2	31.3	25.3	43.1	33.9	43.2	1.46944	0.555264	0.0254904
698	1416367_at	305.6	261.9	317.3	245.3	196.1	189.6	-1.40222	-0.487711	0.0255151	RIKEN cDNA 1110001J03 gene	1110001J03Rik
40045	1455750_at	119.2	104.6	126.2	76.2	89	95.7	-1.34151	-0.423858	0.0255548	Ral GTPase activating protein, alpha subunit 2 (catalytic)	Ralgapa2
4003	1419672_at	632.3	639.3	509.1	723.4	751.2	789.7	1.27158	0.346621	0.0255673	sparc/osteonectin, cwcv and kazal-like domains proteoglycan 1	Spock1
3035	1418704_at	316.3	321.7	268.6	234.2	245.9	246.2	-1.24824	-0.319901	0.0256242	S100 calcium binding protein A13	S100a13
16943	1432637_at	23.9	15.1	36.7	4	3.1	3.3	-7.27885	-2.86371	0.0256357	predicted gene, 19924 /// predicted gene 6943 /// hippocalcin-like protein 1-like	Gm19924 /// Gm6943 /// LOC102642925
31513	1447207_at	57.4	61.2	65.1	51.6	51.5	43	-1.25736	-0.330395	0.0256411	zyg-ll family member B, cell cycle regulator	Zyg11b
17134	1432828_at	31.1	26.5	21.1	11.6	18	10.7	-1.95285	-0.965584	0.0256587
37339	1453044_at	18.2	13.4	23.1	42.9	47.8	29.1	2.19013	1.13102	0.0256608	RIKEN cDNA C030014I23 gene /// uncharacterized LOC102641249	C030014I23Rik /// LOC102641249
33284	1448984_at	120	146.1	135.5	111	102.6	93.8	-1.30644	-0.385642	0.0256863	excision repair cross-complementing rodent repair deficiency, complementation group 4	Ercc4
29113	1444807_at	3.3	3.4	5.1	2	1.9	1.8	-2.07018	-1.04975	0.0257105
8881	1424575_at	393.4	391.8	361.6	476.6	483.8	420.5	1.20413	0.267995	0.0257124	intraflagellar transport 22	Ift22
31311	1447005_at	22.8	17.1	22.1	38.3	27.3	35.2	1.62581	0.701156	0.0257365
44347	1460054_at	15.9	11.2	15.8	5.3	3.4	9.5	-2.35714	-1.23704	0.0257367	trafficking protein particle complex 6A	Trappc6a
23026	1438720_at	214.5	176.6	191.2	232.3	229.3	240.5	1.20574	0.269914	0.0257576	RIKEN cDNA 9330159F19 gene	9330159F19Rik
19942	1435636_at	263.5	295.2	313.6	343.6	349.3	387	1.23799	0.308001	0.0257657	argonaute RISC catalytic subunit 2	Ago2
24574	1440268_at	150	154.3	160.1	139.4	144.3	131.5	-1.1185	-0.161562	0.0258181	tripartite motif-containing 41	Trim41
21180	1436874_x_at	3834.3	4001.7	3433.7	3207.6	3176.6	3116.3	-1.18622	-0.246374	0.0259069	solute carrier family 25 (mitochondrial carrier, adenine nucleotide translocator), member 5	Slc25a5
18926	1434620_s_at	501.2	546	503	561.2	605.1	584.7	1.12953	0.175725	0.0259318	family with sequence similarity 13, member B	Fam13b
28092	1443786_at	2.1	3.2	2.1	1.2	1.2	1.2	-2.05556	-1.03953	0.0259466	undifferentiated embryonic cell transcription factor 1	Utf1
11136	1426830_a_at	2752.4	2715.7	2637.5	2591.4	2588.3	2560.8	-1.04717	-0.0664922	0.0259959	S-adenosylhomocysteine hydrolase-like 1	Ahcyl1
13419	1429113_at	393.1	410	401.2	476.7	427	471.3	1.14174	0.191237	0.0260059	PAXIP1 associated glutamate rich protein 1A /// proline-rich transmembrane protein 2	Pagr1a /// Prrt2
37580	1453285_at	67.3	52.7	65.8	46.1	37	45.7	-1.44255	-0.528618	0.0260352	transmembrane protein 88	Tmem88
41906	1457611_x_at	25.1	28.8	20	13.9	12.4	2.7	-2.54828	-1.34952	0.0260746	family with sequence similarity 136, member A	Fam136a
29107	1444801_at	11.4	14	18.7	8.6	2.9	4.2	-2.80892	-1.49001	0.0261006	RIKEN cDNA 2900041M22 gene	2900041M22Rik
24582	1440276_at	3.4	4.2	5.3	1.8	1.3	2.7	-2.22414	-1.15325	0.0261006	ret finger protein-like 4B	Rfpl4b
36723	1452428_a_at	565.3	465.5	554.7	695.3	686.7	853.8	1.41015	0.495853	0.0261057	beta-2 microglobulin	B2m
21563	1437257_at	107.9	101.5	108.2	117.3	135	123.5	1.18325	0.242754	0.026109	WD repeat domain 47	Wdr47
37894	1453599_at	4.1	2.4	4.8	20.2	16.6	9.1	4.06195	2.02217	0.0261359	tripartite motif-containing 71	Trim71
23732	1439426_x_at	27.4	26.6	29.3	33.2	42.3	36.5	1.34454	0.42711	0.0261951	lysozyme 1	Lyz1
18252	1433946_at	219.3	201.8	222.3	236.9	237.8	235.2	1.10336	0.1419	0.0262137	zinc finger protein interacting with K protein 1	Zik1
33201	1448901_at	41	35.5	41.3	18.9	28.9	29.5	-1.52393	-0.607799	0.0262163	carboxypeptidase X 1 (M14 family)	Cpxm1
6790	1422484_at	2352.3	2042.2	2287	1913.7	1876.6	1697.7	-1.21747	-0.283892	0.0262328	cytochrome c, somatic	Cycs
11272	1426966_at	116.2	127.7	108.5	99.3	98.6	95.9	-1.19946	-0.26238	0.0262328	axin 1	Axin1
18414	1434108_at	509.3	550.3	574.5	624	601.1	617.8	1.12778	0.173482	0.0262432	F-box protein 11	Fbxo11
14845	1430539_at	24.7	16.2	21.2	38.4	31.3	29.8	1.60225	0.680103	0.0262439	matrix-remodelling associated 7	Mxra7
42287	1457992_at	5.8	13.6	11.3	1.8	2.4	2.5	-4.58209	-2.19601	0.026247
42503	1458208_s_at	93.7	78.7	90.4	102.2	114.1	121.8	1.28653	0.363485	0.0262737	methylcrotonoyl-Coenzyme A carboxylase 1 (alpha)	Mccc1
35404	1451109_a_at	1191.8	1263.7	1207.9	1306	1383.3	1444.3	1.12835	0.174216	0.0262932	neural precursor cell expressed, developmentally down-regulated 4	Nedd4
8614	1424308_at	492.3	385.7	512.8	591.6	599.1	653	1.32564	0.406689	0.0262968	solute carrier family 24 (sodium/potassium/calcium exchanger), member 3	Slc24a3
9902	1425596_at	6.3	15.1	9.7	2	1.5	1	-6.91111	-2.78892	0.0263197	expressed sequence AI317395	AI317395
27180	1442874_at	17.5	9.8	12.8	23.5	24.5	19.7	1.68828	0.755554	0.0263306
11006	1426700_a_at	80.6	115.4	88.6	145.2	138.5	125.2	1.43675	0.522812	0.0263535	PAN2 polyA specific ribonuclease subunit homolog (S. cerevisiae)	Pan2
20383	1436077_a_at	202.9	207.1	221.1	178	141.3	176.2	-1.27366	-0.348984	0.0263652	FCH domain only 1	Fcho1
3422	1419091_a_at	92.6	91.8	85.9	128.7	125.2	102.8	1.31964	0.40015	0.0264088	annexin A2	Anxa2
21046	1436740_at	757.8	774.5	758.9	831.3	969.1	904.8	1.18069	0.239632	0.02641	cadherin 11 pseudogene	2610005L07Rik
26851	1442545_at	5.4	6.9	4.9	2.2	4	2.7	-1.93258	-0.950531	0.0264249
30882	1446576_at	17.5	18.1	13.1	9.2	11.7	9.8	-1.58632	-0.665683	0.0264304
11893	1427587_at	14.3	22.4	20.1	12.2	6.7	7	-2.19305	-1.13294	0.0264342	zinc finger protein 28	Zfp28
10566	1426260_a_at	60.4	60.9	71.8	77.6	80.1	75.8	1.20922	0.274074	0.0264661	UDP glucuronosyltransferase 1 family, polypeptide A1 /// UDP glycosyltransferase 1 family, polypeptide A10 /// UDP glucuronosyltransferase 1 family, polypeptide A2 /// UDP glucuronosyltransferase 1 family, polypeptide A5 /// UDP glucuronosyltransferase 1 family, polypeptide A6A /// UDP glucuronosyltransferase 1 family, polypeptide A6B /// UDP glucuronosyltransferase 1 family, polypeptide A7C /// …	Ugt1a1 /// Ugt1a10 /// Ugt1a2 /// Ugt1a5 /// Ugt1a6a /// Ugt1a6b /// Ugt1a7c /// Ugt1a9
8289	1423983_at	847.8	990.3	969.7	763.8	798.7	775.6	-1.20089	-0.264104	0.0265096	seizure related 6 homolog like 2	Sez6l2
35232	1450937_at	540.8	603.9	540.2	628.6	634.1	645.9	1.13277	0.179852	0.026543	lin-7 homolog C (C. elegans)	Lin7c
15417	1431111_at	4.5	2.3	2.5	7	9.3	5.8	2.37634	1.24874	0.0265471	enolase 1, alpha non-neuron /// enolase 1B, retrotransposed	Eno1 /// Eno1b
1409	1417078_at	33.3	26.2	42.4	13	20.8	12.6	-2.19612	-1.13496	0.0265568	lectin, galactose-binding, soluble 2	Lgals2
13446	1429140_at	15.6	9.2	20	35	26	42.5	2.31027	1.20806	0.0265857	spinster homolog 3	Spns3
32996	1448696_at	47.9	55.4	53	61	65.6	59.4	1.19002	0.250985	0.0265988	hephaestin	Heph
18276	1433970_at	389.2	430.8	392.1	364.5	329.7	316.8	-1.19891	-0.261726	0.0266237	bolA-like 3 (E. coli)	Bola3
6041	1421735_a_at	145.2	139.9	132.8	113.4	94.5	121	-1.2706	-0.345509	0.0266265	ST8 alpha-N-acetyl-neuraminide alpha-2,8-sialyltransferase 5	St8sia5
32719	1448419_at	121.4	148.3	160.8	179.2	187.1	202	1.32009	0.400639	0.0266446	processing of precursor 4, ribonuclease P/MRP family, (S. cerevisiae)	Pop4
27979	1443673_x_at	73.5	99.7	80.3	53.2	56.7	60.3	-1.48942	-0.574755	0.026715
32923	1448623_at	166.8	194.6	202.2	138.7	155.6	123.5	-1.34897	-0.431859	0.026733	transmembrane protein 123	Tmem123
1171	1416840_at	1131.4	1030.1	993.6	931.6	806.5	784.7	-1.25063	-0.32266	0.0267335	Mid1 interacting protein 1 (gastrulation specific G12-like (zebrafish))	Mid1ip1
40587	1456292_a_at	175.6	170.9	182.5	192.3	185.8	191.1	1.07599	0.105668	0.0267359	vimentin	Vim
700	1416369_at	347.2	321.5	338.2	359.4	393.4	392.5	1.13745	0.185805	0.0267482	hippocampus abundant transcript-like 1	Hiatl1
43483	1459188_at	12.2	8.9	15.9	6.7	1.7	1.6	-3.7	-1.88753	0.0267621
11505	1427199_at	144.9	164.5	153.6	206.7	200.7	174	1.25572	0.328519	0.0267761	furry homolog-like (Drosophila)	Fryl
9056	1424750_at	59.4	45.6	39.8	69.6	65.7	74	1.44544	0.531511	0.0267995	zinc finger and BTB domain containing 1	Zbtb1
44512	1460219_at	812.4	656.6	660.7	508.5	561.2	494.9	-1.36118	-0.444856	0.0268239	myelin-associated glycoprotein	Mag
36435	1452140_at	145.1	147.2	143.1	180.4	158.4	187.7	1.20923	0.274092	0.0268363	TBC1 domain family, member 20	Tbc1d20
793	1416462_at	998.9	918.7	963.7	1250.1	1082.7	1120.2	1.19842	0.26113	0.0268642	cell cycle associated protein 1	Caprin1
16492	1432186_at	26.5	23.4	22.8	20.3	15.9	18.8	-1.32182	-0.402524	0.0268663	RIKEN cDNA 1700028J19 gene	1700028J19Rik
12767	1428461_at	332.4	321.1	329.2	352	383.4	355.2	1.1098	0.150299	0.0268692	protein phosphatase 2, regulatory subunit B', epsilon	Ppp2r5e
35479	1451184_at	677.8	738.3	724.1	797.7	847.1	777.7	1.1319	0.178751	0.0268892	heterogeneous nuclear ribonucleoprotein A3 pseudogene /// heterogeneous nuclear ribonucleoprotein A3	Gm6793 /// Hnrnpa3
11800	1427494_at	27.4	29.8	24.2	22.2	20.9	21.2	-1.26594	-0.34021	0.026898	homeobox B7	Hoxb7
15294	1430988_at	0.4	0.8	0.3	1	1.7	1.4	2.73333	1.45066	0.026929	selenoprotein T	Selt
7720	1423414_at	72.3	46.9	62.1	103.1	87.3	85.6	1.52234	0.606289	0.0269322	prostaglandin-endoperoxide synthase 1	Ptgs1
22438	1438132_at	76.6	99.6	87.6	111.4	108.7	119.8	1.28848	0.365666	0.0269844	predicted gene 5089	Gm5089
27733	1443427_at	12.9	16.5	23.2	6.8	2.5	8	-3.04046	-1.60429	0.0269871
40837	1456542_s_at	279.6	323.7	353.7	205.6	226.7	256.9	-1.38857	-0.473596	0.0269912	glutaminyl-tRNA synthase (glutamine-hydrolyzing)-like 1	Qrsl1
12761	1428455_at	10.7	17.9	11.1	1.9	6.7	2.9	-3.45217	-1.78751	0.0270091	collagen, type XIV, alpha 1	Col14a1
34434	1450139_at	3.2	1.1	1.1	12.9	8	6.2	5.01852	2.32726	0.0270108	endoplasmic reticulum (ER) to nucleus signalling 2	Ern2
10890	1426584_a_at	102.4	129	83	145.8	158	151.7	1.44879	0.53485	0.0270142	sorbitol dehydrogenase	Sord
34413	1450118_a_at	3	3.9	4.2	1.8	1.9	2.7	-1.73438	-0.794416	0.0270339	troponin T3, skeletal, fast	Tnnt3
7337	1423031_at	274.8	281.3	263.3	227.7	220.1	253.9	-1.16774	-0.223714	0.0270703	macrophage erythroblast attacher	Maea
29798	1445492_at	165	164	168.2	159	152.6	146.5	-1.08535	-0.118164	0.0270837
14682	1430376_at	28	26.3	21.8	15.4	17.4	20	-1.44129	-0.527359	0.0270839	leucine rich repeat containing 9	Lrrc9
35887	1451592_at	192.6	174.8	185.4	169.2	163	164.4	-1.11317	-0.154673	0.027124	Myb-related transcription factor, partner of profilin	Mypop
939	1416608_a_at	775	884.8	809.5	660.1	714.6	582.9	-1.26139	-0.335016	0.0271744	cDNA sequence BC004004	BC004004
23288	1438982_s_at	110.3	127	144.3	80.8	100.1	81.7	-1.45316	-0.539194	0.0272083	FLYWCH family member 2	Flywch2
36218	1451923_at	28.7	14.7	14.5	2.5	4.7	2	-6.29348	-2.65386	0.0272495	raftlin family member 2	Rftn2
24666	1440360_at	73.8	79.3	77.9	45	40	65.3	-1.53693	-0.620048	0.0272573
39016	1454721_at	422.9	380	405.8	442.1	500.8	496	1.19045	0.25151	0.027297	apoptosis resistant E3 ubiquitin protein ligase 1	Arel1
39924	1455629_at	1466.6	1428.1	1435.3	1703.2	1658.7	1525.4	1.12871	0.174671	0.02739	dopamine receptor D1A	Drd1a
32667	1448367_at	30.7	7.4	26.3	59.1	46.9	44.5	2.33696	1.22463	0.0274326	stromal cell derived factor 4	Sdf4
3495	1419164_at	275.1	281	306	244.5	255.1	257.7	-1.13839	-0.18699	0.0274528	zinc finger protein 260	Zfp260
11069	1426763_at	973	940.9	885.6	1023.4	1015.9	1067.7	1.10984	0.150353	0.0274603	ornithine decarboxylase antizyme 2	Oaz2
35575	1451280_at	3534.6	3564	3336.6	4233.6	4186.1	3748	1.16602	0.221598	0.027481	cyclic AMP-regulated phosphoprotein, 21	Arpp21
36991	1452696_a_at	130.6	156.8	120.1	78.2	99.1	98.8	-1.47591	-0.561609	0.02753	RIKEN cDNA 4933439C10 gene	4933439C10Rik
26854	1442548_at	32.5	43	27.3	20.9	15.9	11.4	-2.13278	-1.09274	0.0275683
5557	1421251_at	94.2	100.2	123	73.6	70	79.9	-1.42013	-0.506027	0.0275709	zinc finger protein 40	Zfp40
726	1416395_at	577	551.5	565.3	539.2	536.1	518.1	-1.06301	-0.0881551	0.0275821	guanylate kinase 1	Guk1
20656	1436350_at	1202	1390	1360.1	1562.4	1480.1	1575.2	1.16842	0.224555	0.0275938	family with sequence similarity 171, member B	Fam171b
408	1416077_at	26.1	16.1	16.3	29.3	31.5	34.2	1.62393	0.699491	0.0275978	adrenomedullin	Adm
38593	1454298_at	5.6	9.4	1.9	12.8	12.6	15.6	2.42604	1.2786	0.0276068	RIKEN cDNA 4932430A15 gene	4932430A15Rik
35318	1451023_at	52	48.8	56.8	12.6	39.5	22.1	-2.12399	-1.08678	0.0276512	hyperpolarization-activated, cyclic nucleotide-gated K+ 3	Hcn3
17245	1432939_at	13.4	11.8	9.1	7.4	5.1	7.1	-1.75	-0.807355	0.0276598
19948	1435642_at	423.5	338.6	329.5	467.8	455.3	483.1	1.2882	0.365357	0.0276937	proline rich 18	Prr18
37102	1452807_s_at	144.2	121.5	131.7	75.3	92.6	109.4	-1.4331	-0.519144	0.027696	family with sequence similarity 57, member B	Fam57b
25331	1441025_at	8.8	10.9	9	12.7	14.1	11.7	1.34146	0.423808	0.0276999	predicted gene 9954	Gm9954
24947	1440641_at	118.6	111.6	86.6	67.7	77.6	67	-1.49223	-0.577468	0.02772	vacuolar protein sorting 29 (S. pombe)	Vps29
22714	1438408_at	103.6	98.8	111.5	76.5	93.3	78.4	-1.26471	-0.338802	0.0277245	sosondowah ankyrin repeat domain family member B	Sowahb
26005	1441699_at	17.3	21.8	15.3	11.7	2.8	0.9	-3.53247	-1.82068	0.0277346	ATPase, class I, type 8B, member 2	Atp8b2
18362	1434056_a_at	1665.1	1780.4	1899.6	1594.9	1475.7	1487.6	-1.17263	-0.229753	0.0277674	NADH dehydrogenase (ubiquinone) 1 beta subcomplex, 6	Ndufb6
31893	1447587_at	9.3	4.1	13.6	23	26	16.9	2.44074	1.28732	0.0277677
43960	1459665_s_at	44.6	34.3	41.8	55.8	57.1	48.7	1.33886	0.421002	0.0277842	MRV integration site 1	Mrvi1
769	1416438_at	655.3	665.6	605.6	777.2	713.8	716.8	1.14602	0.196627	0.0277859	poly-U binding splicing factor 60	Puf60
2816	1418485_at	502.1	469.8	468.4	440.7	372.8	396	-1.19082	-0.251959	0.027796	solute carrier family 4 (anion exchanger), member 3	Slc4a3
25101	1440795_x_at	259.7	265.7	258.3	250.5	253.1	243.8	-1.04857	-0.0684209	0.0278193	rabaptin, RAB GTPase binding effector protein 2	Rabep2
22618	1438312_s_at	308.2	286.7	342.1	253.2	263.9	252.2	-1.21799	-0.284503	0.0278704	latent transforming growth factor beta binding protein 3	Ltbp3
35681	1451386_at	47.5	51.6	42.9	57.4	64.7	56.5	1.25775	0.330841	0.0278765	biliverdin reductase B (flavin reductase (NADPH))	Blvrb
31166	1446860_at	83.7	74	68.4	49.2	60.8	58.4	-1.34264	-0.425069	0.0279093
25193	1440887_at	9.2	7.1	6.6	3.5	5.4	2.9	-1.94068	-0.956561	0.0279272	iron/zinc purple acid phospatase-like	Papl
18030	1433724_at	284.8	346	300	362.7	382.9	384.5	1.21412	0.279907	0.0279397	DNA segment, Chr 15, ERATO Doi 621, expressed	D15Ertd621e
11658	1427352_at	27.3	21.5	21.3	4.1	2	15.9	-3.18636	-1.67191	0.0279474	keratin 79	Krt79
4953	1420647_a_at	24	26.7	30.8	21.7	18.8	18.2	-1.38842	-0.47344	0.0279548	keratin 8	Krt8
35040	1450745_at	77.5	81.7	91.1	68.2	58.2	69.5	-1.27769	-0.353541	0.0279752	core 1 synthase, glycoprotein-N-acetylgalactosamine 3-beta-galactosyltransferase, 1	C1galt1
36104	1451809_s_at	74.4	87.1	102.3	60.7	62.2	48.9	-1.53551	-0.618715	0.0280018	RWD domain containing 3	Rwdd3
12387	1428081_at	121.6	89.7	83	35.3	53.2	61.8	-1.95808	-0.969443	0.0280123	kelch-like 21	Klhl21
1859	1417528_at	60.8	47.8	54	41.7	42.2	40.3	-1.30918	-0.388662	0.028014	sperm associated antigen 6	Spag6
37721	1453426_a_at	29.1	36.4	10.3	51.4	59	49.4	2.10818	1.076	0.0280179	WD repeat and FYVE domain containing 1	Wdfy1
28840	1444534_at	24.6	34.1	27.6	20.4	14.1	9.9	-1.94369	-0.958801	0.0280309
24511	1440205_at	54.8	59.3	46.7	66.1	65	68	1.23818	0.308226	0.0280631	zinc finger, MYND domain containing 19	Zmynd19
24071	1439765_x_at	388.9	393.8	428.9	354.8	355.7	367.4	-1.12404	-0.16869	0.0281062	keratin 42	Krt42
24345	1440039_at	46.7	51.4	45.7	41.2	40.6	34.8	-1.23328	-0.302496	0.028128
38543	1454248_at	9.2	4.3	7.9	1.8	2	2.6	-3.34375	-1.74147	0.0281282	calcium and integrin binding family member 4	Cib4
6562	1422256_at	102.1	63.3	97.2	147.4	129.2	179.9	1.73839	0.797748	0.0281469	somatostatin receptor 2	Sstr2
1979	1417648_s_at	379.4	356.6	392.1	307.7	261.6	330	-1.25442	-0.327021	0.0281552	sorting nexin 5	Snx5
12846	1428540_at	762.9	689.3	799.6	923.1	889.2	842.7	1.17906	0.237633	0.0281603	family with sequence similarity 115, member A	Fam115a
19130	1434824_at	491.4	436.9	478.4	517.9	567.7	541.5	1.15668	0.209988	0.0281997	bromodomain adjacent to zinc finger domain, 1B	Baz1b
25710	1441404_at	167.7	215.7	220.2	27.2	46.1	139.9	-2.83114	-1.50139	0.0282019
11391	1427085_at	144.4	128.9	141.8	153.4	166.5	157.4	1.14984	0.201437	0.0282057	ribonuclease P/MRP 25 subunit-like	Rpp25l
29548	1445242_at	56.4	51.5	48.8	34.3	40.8	22.2	-1.61048	-0.687493	0.0282072	glycerol kinase	Gyk
17376	1433070_at	41.2	33.6	35.3	15.6	25.8	26.4	-1.62389	-0.699457	0.028238	RIKEN cDNA 5830433M15 gene	5830433M15Rik
8351	1424045_at	336.7	325.6	377.8	291.7	224.2	268.3	-1.32632	-0.407429	0.0282477	transmembrane protein 242	Tmem242
26614	1442308_at	38.6	42.9	43.9	27.2	31	36.2	-1.32839	-0.409679	0.0282569	SET and MYND domain containing 4	Smyd4
1077	1416746_at	350.2	315.8	308.2	390	364.7	370.8	1.15531	0.208276	0.0282581	H2A histone family, member X	H2afx
[truncated: 43,103 more rows]

## Sheet: only p=0.05 or less
ID	!Sample_source_name_ch1	WT striatum	WT striatum	WT striatum	PGC-1a KO mouse striatum	PGC1-a KO striatum	PGC1-a KO striatum
	ID_REF	GSM135225	GSM135226	GSM135227	GSM135217	GSM135219	GSM135221	Fold change KO/WT	log2(KO/WT)	P (t-test)	Gene Title	Gene Symbol
1971	1417640_at	1.2	0.9	0.9	14.1	12.4	19	15.1667	3.92283	0.00202321	CD79B antigen	Cd79b
31653	1447347_at	1.4	1	1.2	14.8	19.8	11.9	12.9167	3.69116	0.003462
6006	1421700_at	1.1	1.4	1.1	11.5	14	13.5	10.8333	3.43741	0.000105921	testis expressed gene 16	Tex16
5087	1420781_at	1.6	1.1	3.5	13.9	18.3	25.7	9.33871	3.22322	0.00806511	ectopic ossification 1	Etos1
37428	1453133_at	2.5	3	1.2	23.6	17.3	21.3	9.28358	3.21468	0.000645118	solute carrier family 25 (mitochondrial carrier; adenine nucleotide translocator), member 31	Slc25a31
29807	1445501_at	1.2	1	1.7	5	14.3	16.9	9.28205	3.21444	0.0409116
3425	1419094_at	1.1	0.8	1.3	15	4.7	9.8	9.21875	3.20457	0.0421849	cytochrome P450, family 2. subfamily c, polypeptide 37	Cyp2c37
35274	1450979_at	0.8	0.5	1	5.8	4.9	10.4	9.17391	3.19754	0.0214686	carcinoembryonic antigen-related cell adhesion molecule 14	Ceacam14
21829	1437523_s_at	0.4	0.9	2.3	7.9	9.7	13.5	8.63889	3.11085	0.00629407	sarcoglycan, gamma (dystrophin-associated glycoprotein)	Sgcg
2635	1418304_at	39.9	40.3	62.3	380	396.6	388.1	8.17333	3.03092	2.67829e-06	cadherin-related family member 1	Cdhr1
18930	1434624_x_at	98.3	107.4	127.9	920.8	854.9	851.9	7.8765	2.97755	5.90768e-06	ribosomal protein S9	Rps9
44764	1460472_at	5.2	4.4	3.9	34.3	30.2	38.7	7.64444	2.93441	0.000272807	cyclin-dependent kinase 3, pseudogene	Cdk3-ps
14793	1430487_at	2.5	1.2	3	12.8	16.4	20.2	7.37313	2.88228	0.00295432	AU RNA binding protein/enoyl-coenzyme A hydratase	Auh
29964	1445658_at	1.5	3.8	6.8	29.2	42.2	17.8	7.3719	2.88204	0.0235308
43420	1459125_at	0.8	0.6	1.3	8.4	3.9	7	7.14815	2.83757	0.0147125	RIKEN cDNA D030059C06 gene	D030059C06Rik
3006	1418675_at	3.4	0.8	1.6	9.2	13.3	18	6.98276	2.8038	0.0121106	oncostatin M receptor	Osmr
26971	1442665_at	1.4	2.2	2.8	16	10.1	16.8	6.70313	2.74483	0.00481628
30011	1445705_x_at	4.2	1.7	1	20.6	15.3	9.9	6.63768	2.73068	0.0160689	dipeptidylpeptidase 8	Dpp8
42828	1458533_at	0.5	0.8	2.8	13.4	7.6	6.1	6.60976	2.7246	0.0306052	RIKEN cDNA 9330169L03 gene	9330169L03Rik
6403	1422097_at	1.6	1.4	1.7	14.8	5.3	10.8	6.57447	2.71687	0.0338654	RIKEN cDNA 4933434I20 gene	4933434I20Rik
36299	1452004_at	5.2	0.7	0.9	18	14.7	11.4	6.48529	2.69717	0.00665382	calcitonin/calcitonin-related polypeptide, alpha	Calca
36811	1452516_at	2.4	4	5.5	30.3	19.9	26.6	6.45378	2.69014	0.00241771	sperm motility kinase 3A /// sperm motility kinase 3B /// sperm motility kinase 3C	Smok3a
28337	1444031_at	4.7	0.7	1.8	15.5	15.8	13.6	6.23611	2.64065	0.000801208	calcium/calmodulin-dependent protein kinase II, delta	Camk2d
34534	1450239_at	3.8	2.7	2.1	14.1	10.8	27.6	6.10465	2.60991	0.0471436	glycine receptor, alpha 3 subunit	Glra3
24958	1440652_at	1.7	2.9	2.7	22.1	11.2	10	5.93151	2.5684	0.0361043	ankyrin repeat domain 44	Ankrd44
30642	1446336_at	2.9	0.6	1.9	10.7	6.9	14.1	5.87037	2.55345	0.0159315
40138	1455843_at	2.9	1.6	0.9	13.8	7.4	10.4	5.85185	2.54889	0.010796	fucosyltransferase 4	Fut4
41980	1457685_at	0.8	1	5.7	13.6	16.9	12.9	5.78667	2.53273	0.00407519	zinc finger protein 81	Zfp81
285	1415954_at	0.6	0.6	1.6	4.8	6.8	4.1	5.60714	2.48727	0.00796066	trypsin 4 /// trypsin 5	Try4
28430	1444124_a_at	3.6	4	1.6	13.6	23.5	13.5	5.5	2.45943	0.0153463	RIKEN cDNA E330017L17 gene	E330017L17Rik
10260	1425954_a_at	5.1	1.4	6.3	14.3	26	28.5	5.375	2.42626	0.0155799	apurinic/apyrimidinic endonuclease 2	Apex2
16028	1431722_a_at	1.3	3.3	2	7.6	16.3	11.5	5.36364	2.42321	0.0205424	arylformamidase	Afmid
28067	1443761_at	2.1	0.6	0.9	5.3	4.3	9.5	5.30556	2.4075	0.035634	nurim (nuclear envelope membrane protein)	Nrm
4842	1420536_at	7.4	1.9	5	25.1	21.6	28.8	5.27972	2.40046	0.00146374	crystallin, beta B2	Crybb2
16368	1432062_at	8.1	2.5	1.8	23.7	22.1	19.4	5.25806	2.39453	0.00171534	MAM domain containing glycosylphosphatidylinositol anchor 1	Mdga1
5781	1421475_at	2	4.3	3.5	17.7	10.3	23.4	5.2449	2.39091	0.0227552	membrane-spanning 4-domains, subfamily A, member 2	Ms4a2
24938	1440632_at	6.2	3.3	1.5	13.9	27.2	16.5	5.23636	2.38857	0.0224065	protocadherin beta 4	Pcdhb4
3239	1418908_at	112.4	112.2	110.7	664.6	686	393.4	5.20131	2.37888	0.00756337	peptidylglycine alpha-amidating monooxygenase	Pam
16375	1432069_at	2.8	2.9	5.3	24.2	11.7	21	5.17273	2.37093	0.0162983	RIKEN cDNA 1700023G09 gene	1700023G09Rik
29572	1445266_at	3	1.6	6.3	18.4	27.2	10.6	5.15596	2.36624	0.0390057	excision repair cross-complementing rodent repair deficiency, complementation group 1	Ercc1
18099	1433793_s_at	9	3.2	14.7	49.6	42	46	5.11524	2.3548	0.000752566	nuclear receptor interacting protein 2	Nrip2
29038	1444732_at	8.3	1.1	5.8	38.9	21.3	17	5.07895	2.34453	0.0422912
6698	1422392_at	3.1	0.6	1.3	7.8	8.5	9	5.06	2.33914	0.00118692	vomeronasal 1 receptor 15	Vmn1r15
34434	1450139_at	3.2	1.1	1.1	12.9	8	6.2	5.01852	2.32726	0.0270108	endoplasmic reticulum (ER) to nucleus signalling 2	Ern2
38648	1454353_at	4.5	3	9.7	29.7	28.9	27.6	5.01163	2.32528	0.000409821	RIKEN cDNA 4833420D23 gene	4833420D23Rik
13953	1429647_at	3	24.6	3	70.5	50.1	32	4.98693	2.31815	0.0373053	protease, serine 56	Prss56
25068	1440762_at	4.1	1.1	5.5	13.1	21.1	18.4	4.91589	2.29745	0.00650247	synapsin II	Syn2
29756	1445450_x_at	2.3	0.5	0.8	7.3	2.9	7.3	4.86111	2.28129	0.0418261	Riken cDNA A530021J07 gene	A530021J07Rik
7332	1423026_at	5.2	2.5	5.4	29	12.1	22.1	4.82443	2.27036	0.0287322	RAD51 homolog C	Rad51c
22129	1437823_at	3.5	2.1	3.5	14.2	10.8	18.8	4.81319	2.26699	0.00809218	predicted gene 12406 ///	Gm12406
31260	1446954_at	5.1	6.3	3	14.2	23.3	31.5	4.79167	2.26053	0.023237
7067	1422761_at	1.2	4	5.4	18.3	18.7	13.6	4.77358	2.25507	0.0028872	transducin (beta)-like 1X-linked receptor 1	Tbl1xr1
5985	1421679_a_at	5.8	7.1	12.1	27	51	39.8	4.712	2.23634	0.012649	cyclin-dependent kinase inhibitor 1A (P21)	Cdkn1a
43628	1459333_at	4.7	1.5	1.5	14.6	12.1	9.3	4.67532	2.22507	0.00720075
9681	1425375_at	2.7	1.9	1.5	12.6	9.2	6.7	4.67213	2.22408	0.0128787	TD and POZ domain containing 1	Tdpoz1
42212	1457917_at	2.6	1.6	6.4	15.7	15	18.8	4.66981	2.22336	0.00227637	lymphocyte protein tyrosine kinase	Lck
34018	1449719_at	7.7	2.5	2.1	9.3	24.8	23.1	4.65041	2.21736	0.0458224	RIKEN cDNA 4930453N24 gene	4930453N24Rik
33684	1449384_at	6.3	4.8	1.4	17.2	23.7	17.1	4.64	2.21412	0.00443098	RIKEN cDNA 4931417E11 gene	4931417E11Rik
24611	1440305_at	40.4	27.6	38.9	140.2	211.5	144.2	4.63891	2.21379	0.00524962
30777	1446471_at	2.7	4.3	1.3	10.9	12.6	14.4	4.56627	2.19101	0.00176829
26103	1441797_at	32.6	24.5	18.7	85.2	151.5	105.7	4.51715	2.17541	0.0113211
2010	1417679_at	3.3	3.3	1.2	9.7	10.9	14.5	4.5	2.16993	0.00475274	growth factor independent 1	Gfi1
26326	1442020_at	1.9	3.5	1.6	15.3	10.2	5.9	4.48571	2.16534	0.0430037	predicted gene 12863	Gm12863
31406	1447100_s_at	51.8	38.8	42	211.8	199.1	179.9	4.45551	2.15559	0.000109874	RIKEN cDNA 5730508B09 gene	5730508B09Rik
43406	1459111_at	1.5	1.3	14.8	18.8	22.2	37.3	4.44886	2.15344	0.0488915	RIKEN cDNA 4831440E17 gene	4831440E17Rik
7044	1422738_at	4.1	9.7	7.7	33.1	28.8	33.4	4.43256	2.14814	0.000371854	discoidin domain receptor family, member 2	Ddr2
2707	1418376_at	8.1	1.6	3.9	20.5	11.7	28	4.42647	2.14616	0.037747	fibroblast growth factor 15	Fgf15
9717	1425411_at	1.1	3	4	8.3	10.1	17.1	4.38272	2.13183	0.0315604	ADP-ribosylation factor-like 4A	Arl4a
16961	1432655_at	2.2	2.5	3.1	6	12	16.1	4.37179	2.12823	0.0408549	RIKEN cDNA 3222402N08 gene	3222402N08Rik
41753	1457458_at	2.3	1.7	16.2	29.1	18.7	39.2	4.30693	2.10666	0.042494	zinc finger CCCH-type containing 4	Zc3h4
42960	1458665_at	5.6	2.6	3.3	17.3	11.5	20.7	4.30435	2.10579	0.0110855
45029	1460738_at	4.4	3.3	9.8	16.8	29	29.4	4.29714	2.10338	0.0138745	LIM domain containing 2	Limd2
28593	1444287_at	4.1	2.4	3.2	11.7	10.9	18.7	4.25773	2.09009	0.014025	expressed sequence AI853106	AI853106
10110	1425804_at	2.4	1	2.9	7.4	13.5	5.9	4.25397	2.08881	0.046113	H6 homeobox 2	Hmx2
25749	1441443_at	9.5	4.3	7.9	30.3	21.3	40.7	4.25346	2.08864	0.0154895
44799	1460507_at	4	5.4	3.6	16.6	15.3	23.3	4.24615	2.08616	0.00518183	RIKEN cDNA 4930552P12 gene	4930552P12Rik
6327	1422021_at	2.9	0.9	2.1	10.3	5.2	9.5	4.23729	2.08314	0.0195329	sprouty homolog 4 (Drosophila)	Spry4
29024	1444718_at	7.1	0.8	1	13.7	15.5	8.5	4.23596	2.08269	0.0311201	triggering receptor expressed on myeloid cells-like 2	Treml2
27387	1443081_at	6.2	3	3.9	19.5	19.4	16.2	4.20611	2.07249	0.000631749	GATA binding protein 6	Gata6
10015	1425709_at	4.8	0.7	1.8	7.1	15	8.6	4.20548	2.07227	0.0453139	ring finger protein 17	Rnf17
26600	1442294_at	2.4	8.4	1.5	20.9	14.5	16.3	4.20325	2.07151	0.010395	RIKEN cDNA A530053G22 gene	A530053G22Rik
12170	1427864_at	7.2	5.3	1.5	12.8	18.1	27.1	4.14286	2.05063	0.0310527	histone cluster 1, H3a /// histone cluster 1, H3b /// histone cluster 1, H3c /// histone cluster 1, H3d /// histone cluster 1, H3e /// histone cluster 1, H3f /// histone cluster 1, H3g /// histone cluster 1, H3h /// histone cluster 1, H3i /// histone cluster 2, H3b /// histone cluster 2, H3c1 /// histone cluster 2, H3c2	Hist1h3a
36056	1451761_at	5.4	1.1	2.8	16.6	9.6	12.3	4.13978	2.04956	0.0152167	homeobox B4	Hoxb4
43470	1459175_at	1.4	1.3	5.1	11.6	7.7	12.6	4.08974	2.03201	0.014586
30202	1445896_at	1.6	2.6	7.9	12.4	16.9	20.1	4.08264	2.0295	0.0138159	RIKEN cDNA 2810433D01 gene	2810433D01Rik
17314	1433008_at	1.5	1.3	8.6	16.8	14.1	15.5	4.07018	2.02509	0.00986554	RIKEN cDNA 6330526H18 gene	6330526H18Rik
37894	1453599_at	4.1	2.4	4.8	20.2	16.6	9.1	4.06195	2.02217	0.0261359	tripartite motif-containing 71	Trim71
21079	1436773_x_at	3.6	5.9	1	13.9	8.4	20.3	4.05714	2.02046	0.0451236	MARVEL (membrane-associating) domain containing 1	Marveld1
31174	1446868_at	2.5	4	3	14.2	6.3	18	4.05263	2.01886	0.0496888
12976	1428670_at	2.5	5.9	18.4	34.6	30.5	43.4	4.04851	2.01739	0.0114518
4187	1419864_x_at	4.3	4	4.2	14.9	15.4	20.3	4.048	2.01721	0.00181326	transportin 1	Tnpo1
37620	1453325_at	4.8	3.9	2	20.7	11.4	11.1	4.03738	2.01342	0.0292229	protein phosphatase 6, regulatory subunit 2	Ppp6r2
28894	1444588_at	10.3	6.3	2.5	23.6	23.7	29.1	4	2	0.00272905
38354	1454059_at	7.7	5.8	5.4	31.8	16.4	27.3	3.99471	1.99809	0.0151237	RIKEN cDNA 4930500F04 gene	4930500F04Rik
17452	1433146_at	2.8	2.9	3.5	13.9	15.6	7.2	3.98913	1.99607	0.0235411
12162	1427856_a_at	2.3	3.7	1.1	10.1	5.6	12.6	3.98592	1.99491	0.0316926	immunoglobulin kappa variable 4-73 /// immunoglobulin kappa variable 4-81	Igkv4-73
31968	1447662_x_at	1.9	6	2.5	10.5	17.1	13.5	3.95192	1.98255	0.0111962	low density lipoprotein receptor class A domain containing 4	Ldlrad4
31476	1447170_at	0.6	0.7	0.4	1.5	3.1	2.1	3.94118	1.97863	0.0246873
7232	1422926_at	2	1.2	1.6	7.8	7.4	3.7	3.9375	1.97728	0.0238817	melanocortin 2 receptor	Mc2r
39752	1455457_at	8.2	0.8	3.9	24.1	13.1	13.4	3.92248	1.97177	0.0404284	cytochrome P450, family 2, subfamily c, polypeptide 54	Cyp2c54
41780	1457485_at	4.7	16.3	14	47.2	42.1	47.6	3.91143	1.9677	0.00101813
42894	1458599_at	2.6	1.8	6.3	15.1	13.9	12.8	3.90654	1.96589	0.00251844
3101	1418770_at	2.1	3.2	3.5	13.5	12.8	7.7	3.86364	1.94996	0.0110254	CD2 antigen	Cd2
17409	1433103_at	2.5	2.1	2.1	6.5	9.4	9.8	3.83582	1.93954	0.00378528	hydrolethalus syndrome 1	Hyls1
27276	1442970_at	2.1	0.4	4.9	6.9	8.4	13	3.82432	1.9352	0.0366363	FCH and double SH3 domains 2	Fchsd2
16648	1432342_at	5.8	2.8	10.2	25.8	23.3	22.5	3.80851	1.92923	0.00174855	nicotinamide nucleotide adenylyltransferase 3	Nmnat3
33352	1449052_a_at	8.8	4.1	2.3	26.7	14.6	15.8	3.75658	1.90942	0.0316393	DNA methyltransferase 3B	Dnmt3b
4105	1419774_at	3.8	4.3	3.1	19.4	8.5	14.1	3.75	1.90689	0.0315948	DNA segment, Chr 2, ERATO Doi 239, expressed	D2Ertd239e
34151	1449856_at	3.2	5.7	1.1	17	6.9	13.5	3.74	1.90304	0.0481282	regulator of G-protein signaling 18	Rgs18
43332	1459037_at	1.9	3.1	12.6	24.1	15.3	26.4	3.73864	1.90251	0.0283636
34084	1449785_at	0.4	7.7	5.5	9.6	22.1	19	3.72794	1.89838	0.0462868	expressed sequence AA414993	AA414993
30458	1446152_at	8.7	5.7	10.1	17.8	44.9	28.2	3.7102	1.8915	0.0504895
17535	1433229_at	3.7	3.2	3	15.5	8.2	12.7	3.67677	1.87844	0.0144401	RIKEN cDNA 9430031J08 gene	9430031J08Rik
36195	1451900_at	7	1.2	1.1	12.4	7.5	13.8	3.62366	1.85745	0.040755	mitofusin 2	Mfn2
43337	1459042_at	4.8	20.5	4.1	41	38.1	27.3	3.61905	1.85561	0.0193891	regulating synaptic membrane exocytosis 3	Rims3
29562	1445256_at	1.1	1.6	8.3	14.6	15.6	9.6	3.61818	1.85526	0.0319679
38245	1453950_a_at	1.5	3.4	3.9	8.1	9.2	14.4	3.60227	1.84891	0.0212539	X-ray repair complementing defective repair in Chinese hamster cells 2	Xrcc2
23722	1439416_x_at	12.3	10.6	14.6	59	40.5	35.3	3.59467	1.84586	0.0112263	tubulin, beta 4B class IVB	Tubb4b
15923	1431617_at	1.4	2.8	6.1	7.4	16.7	12.9	3.59223	1.84488	0.0428289	RIKEN cDNA 4933405E24 gene	4933405E24Rik
37850	1453555_at	3.6	12.5	1.2	15.5	18.4	28.1	3.58382	1.8415	0.0439493	RIKEN cDNA 3830408D07 gene	3830408D07Rik
3287	1418956_at	7.2	5.1	5.1	19.4	27.6	15.2	3.57471	1.83783	0.0157656	testis-specific serine kinase 6	Tssk6
15879	1431573_at	1.9	2.7	2.4	9.6	4.6	10.7	3.55714	1.83072	0.0343664	spermidine/spermine N1-acetyl transferase-like 1	Satl1
16086	1431780_at	8.2	7.7	2.1	22.1	22.8	19	3.55	1.82782	0.00255616	cadherin-related family member 4	Cdhr4
14625	1430319_at	6.8	2.1	1.5	12.5	11.1	13.3	3.54808	1.82704	0.00791932	RIKEN cDNA 4833411C07 gene	4833411C07Rik
9035	1424729_at	1.8	2.3	4.3	7.1	14.5	8.1	3.53571	1.822	0.0437181	adipogenin	Adig
16998	1432692_at	3.8	3.8	7.5	14.4	12.4	26.4	3.52318	1.81688	0.0490131	RIKEN cDNA 4930517G19 gene	4930517G19Rik
5984	1421678_at	8	4.9	4	17.3	23.8	18.4	3.52071	1.81587	0.00375775	inositol 1,4,5-triphosphate receptor 2	Itpr2
6003	1421697_at	2.7	3.9	3.8	15.7	10.7	10.2	3.51923	1.81526	0.00828815	Usher syndrome 2A (autosomal recessive, mild)	Ush2a
18796	1434490_at	5.8	1.5	1.6	9.2	11.6	10.5	3.51685	1.81429	0.00908487	scavenger receptor class F, member 1	Scarf1
28909	1444603_at	3.3	2.6	2.4	7.4	12.4	9.3	3.50602	1.80984	0.00947013	RIKEN cDNA 2810030D12 gene	2810030D12Rik
6701	1422395_at	0.5	2.2	10	16.5	15	12.4	3.45669	1.78939	0.0301986	vomeronasal 1 receptor 25 /// vomeronasal 1 receptor 30	Vmn1r25
41531	1457236_at	3.1	2	1.1	4.3	8.6	8.4	3.43548	1.78051	0.0293652	G protein-coupled receptor 62	Gpr62
7236	1422930_at	12.2	2.2	1.6	16.8	20.3	17.6	3.41875	1.77347	0.0230387	intercellular adhesion molecule 4, Landsteiner-Wiener blood group	Icam4
14619	1430313_at	3.3	1.5	6.2	11.2	13.7	12.7	3.41818	1.77323	0.00462029	ADAMTS-like 1	Adamtsl1
21627	1437321_at	13.6	5.7	2.1	29.3	20.2	23.1	3.39252	1.76236	0.0169219	ATPase, Na+/K+ transporting, alpha 4 polypeptide	Atp1a4
27989	1443683_at	11.8	18.6	7.5	39.3	35.5	53.5	3.38522	1.75925	0.00904931
43555	1459260_at	2.1	3.6	2.8	10.2	6.2	12.1	3.35294	1.74543	0.0204687	predicted gene 13152 /// uncharacterized LOC102634244 /// zinc finger protein 468-like	Gm13152
32151	1447845_s_at	1.4	1.4	2.9	5.6	5.6	7.7	3.31579	1.72935	0.0069106	vanin 1	Vnn1
38809	1454514_at	6.4	7.3	3.6	26.7	20	10.6	3.31214	1.72776	0.0499456	RIKEN cDNA 5730415C11 gene	5730415C11Rik
9846	1425540_at	5	1.4	15.4	22	19	30.8	3.29358	1.71966	0.0385892	ornithine transcarbamylase	Otc
22875	1438569_at	8.9	3.1	1.5	17.4	14.1	12.7	3.27407	1.71109	0.0180031	coiled-coil domain containing 38	Ccdc38
41849	1457554_at	4.4	2.2	6.6	16	8.8	18.1	3.25	1.70044	0.0327543	apolipoprotein B	Apob
4082	1419751_x_at	0.7	0.7	6.8	9.4	9.8	7.4	3.2439	1.69773	0.0471796	solute carrier family 22, member 27	Slc22a27
14461	1430155_at	4.2	1.9	18.9	33	19.6	28.3	3.236	1.69421	0.0479887	RIKEN cDNA 4933427E11 gene	4933427E11Rik
4520	1420201_at	2	2.7	2.1	5.4	8.4	8.1	3.22059	1.68732	0.00677682
9675	1425369_a_at	9.1	4.6	6.4	26	17.4	21.3	3.21891	1.68657	0.00611895	SRY (sex determining region Y)-box 10	Sox10
43350	1459055_at	7.2	2.4	4	14.7	12.9	16	3.20588	1.68072	0.00393677	forkhead box J3	Foxj3
3248	1418917_at	6.8	12.6	1.5	18.9	20	28	3.20096	1.6785	0.0234776	heme binding protein 2	Hebp2
7740	1423434_at	2.4	4.1	3.8	8.7	11.7	12.5	3.19417	1.67544	0.0040455	TEA domain family member 1	Tead1
34580	1450285_at	3.5	8.6	3.3	16.5	12.5	20.1	3.18831	1.67279	0.0159223	ubiquitin-activating enzyme, Chr Y	Uba1y
35767	1451472_at	5.5	3.5	6.7	9.2	20.6	20	3.17197	1.66538	0.0409127	glutamyl-tRNA synthetase 2 (mitochondrial)(putative)	Ears2
26058	1441752_at	2.8	1.4	7.5	13.4	7.7	15.2	3.10256	1.63346	0.0482986	ADP-ribosyltransferase 3	Art3
15043	1430737_at	10.2	3.8	1.4	18.4	17.4	11.8	3.09091	1.62803	0.0323003	zinc finger protein 773	Zfp773
35058	1450763_x_at	2.2	3.1	9.3	10.9	14	19.9	3.06849	1.61753	0.0435819	wingless-type MMTV integration site family, member 3	Wnt3
43153	1458858_at	1.3	4.1	5.4	15.3	8.9	8.9	3.06481	1.6158	0.0387425
6590	1422284_at	8.6	7.4	7.1	22.3	26.6	21.2	3.03463	1.60152	0.000788131	NK2 homeobox 9	Nkx2-9
41955	1457660_x_at	1.1	1	4.4	8.2	6.2	5.3	3.03077	1.59968	0.035349	RIKEN cDNA 5430416O09 gene	5430416O09Rik
8628	1424322_at	5.4	14.4	3.4	28.7	22.9	18.7	3.03017	1.5994	0.0243627	apurinic/apyrimidinic endonuclease 2	Apex2
30552	1446246_at	1.5	5	10.2	19.1	15.8	15.7	3.02994	1.59929	0.0149827	predicted gene 438	Gm438
25036	1440730_at	1	1.8	1.9	5.1	4.3	4.8	3.02128	1.59516	0.00100419
14980	1430674_at	4.2	4	3.4	14.1	6.4	13.9	2.96552	1.56828	0.0405052	RIKEN cDNA 1700016C15 gene	1700016C15Rik
36893	1452598_at	14.3	14	4.1	31.1	30	34.9	2.96296	1.56704	0.00443853	GINS complex subunit 1 (Psf1 homolog)	Gins1
35932	1451637_a_at	3.8	2	1	8.5	5.4	6.1	2.94118	1.55639	0.0241949	proline rich, lacrimal 1	Prol1
21682	1437376_at	2.9	0.7	1.2	3.3	5.2	5.6	2.9375	1.55459	0.0333393	a disintegrin and metallopeptidase domain 32	Adam32
29893	1445587_at	0.9	0.8	1.4	2.6	3.1	3.4	2.93548	1.5536	0.00257026
41677	1457382_at	5.3	5.4	3.1	13.4	12.1	14.9	2.92754	1.54969	0.0013022
19726	1435420_at	5.1	4.1	3.6	17.3	12.6	7.5	2.92188	1.54689	0.0457825	solute carrier family 4, sodium bicarbonate cotransporter, member 5	Slc4a5
15050	1430744_at	2.1	1.7	3.7	6.4	8.8	6.6	2.90667	1.53937	0.00831689	napsin A aspartic peptidase	Napsa
31421	1447115_at	8.6	4.2	14.7	26.8	29.4	23.6	2.90182	1.53696	0.00740807	solute carrier family 26, member 10	Slc26a10
43397	1459102_at	1.9	1.9	1	4.3	3	6.6	2.89583	1.53398	0.0502481
33232	1448932_at	4.3	7.9	5	17.2	11.3	20.7	2.86047	1.51625	0.0225864	keratin 16	Krt16
40272	1455977_x_at	9.9	4.3	4.8	18.4	19.1	16.8	2.85789	1.51495	0.00355273	kallikrein 1	Klk1
14529	1430223_at	5.7	7.8	4.5	20.9	17.6	12.7	2.84444	1.50815	0.0125833	RIKEN cDNA 4930442P07 gene	4930442P07Rik
34651	1450356_at	8.8	8.9	8.5	16.6	30.1	27.8	2.84351	1.50767	0.018156	thyrotropin releasing hormone receptor 2	Trhr2
14479	1430173_x_at	7.5	2.3	7	17.1	10.4	20	2.82738	1.49947	0.0358585	cytochrome P450, family 4, subfamily f, polypeptide 16	Cyp4f16
13663	1429357_at	15.9	4	10.3	18.8	37.3	29.1	2.82119	1.4963	0.0449087	family with sequence similarity 135, member A	Fam135a
25038	1440732_at	4.2	2.3	6.7	9.1	17	11.1	2.81818	1.49476	0.0410706	nuclear receptor coactivator 2 pseudogene	D030018L15Rik
7032	1422726_x_at	1.8	10.5	7.2	16.9	14	23.9	2.81026	1.4907	0.0387184	spermatogenesis associated glutamate (E)-rich protein 4a	Speer4a
27712	1443406_at	10.5	11.8	31.2	43.6	47.6	58.9	2.80561	1.48831	0.0165429	phospholipid scramblase 4	Plscr4
534	1416203_at	12.8	3.5	4.5	18	22.9	17.3	2.79808	1.48444	0.022149	aquaporin 1	Aqp1
1311	1416980_at	1.6	1.2	1.1	4.5	3.6	2.8	2.79487	1.48278	0.0105177	methyltransferase like 7B	Mettl7b
39366	1455071_at	14	4.1	19.2	24.6	40.2	38.6	2.77212	1.47099	0.0295046	zinc finger and BTB domain containing 7B	Zbtb7b
15241	1430935_at	16.8	3	8.2	22.2	24.7	30.7	2.77143	1.47063	0.0253176	RIKEN cDNA 4933413G19 gene	4933413G19Rik
45082	AFFX-r2-Bs-thr-5_s_at	1.5	7.9	5.7	18	9.4	14.4	2.76821	1.46895	0.0463293
33333	1449033_at	0.4	5.6	6.9	15	10.4	10.3	2.76744	1.46855	0.0392882	tumor necrosis factor receptor superfamily, member 11b (osteoprotegerin)	Tnfrsf11b
35893	1451598_at	1.9	1.3	3.6	6.2	5.4	7.2	2.76471	1.46713	0.00978849	paired box 4	Pax4
29722	1445416_at	3.1	1.8	2.4	6.8	5.3	8	2.75342	1.46123	0.00791194	centrosomal protein 41	Cep41
23723	1439417_at	2.7	2.6	5.7	12	7.2	11	2.74545	1.45705	0.0228936	quiescin Q6 sulfhydryl oxidase 1	Qsox1
17426	1433120_at	4.1	2.7	3.4	6.6	12.7	8.7	2.7451	1.45686	0.0318316	RIKEN cDNA 9530002O20 gene	9530002O20Rik
15294	1430988_at	0.4	0.8	0.3	1	1.7	1.4	2.73333	1.45066	0.026929	selenoprotein T	Selt
17263	1432957_at	1.5	2.4	3.9	5.3	6.5	9.5	2.73077	1.44931	0.0347494	RIKEN cDNA 5730407O05 gene	5730407O05Rik
30832	1446526_at	1.1	9.1	9	15.4	16.9	19.8	2.71354	1.44018	0.0204754	RIKEN cDNA 9330199F22 gene /// predicted gene 2379	9330199F22Rik
42633	1458338_x_at	4	11.6	12.4	26.6	25.4	23.8	2.70714	1.43677	0.00469088	nuclear receptor subfamily 2, group C, member 1	Nr2c1
33093	1448793_a_at	139.9	130	134.5	332.3	370.5	390.2	2.70277	1.43444	0.000183789	syndecan 4	Sdc4
16085	1431779_at	2.1	2.6	2.7	6.2	7.5	6.3	2.7027	1.4344	0.000778851
1795	1417464_at	2.5	4	1.8	7.7	6	8.7	2.6988	1.43232	0.0100021	troponin C2, fast	Tnnc2
35773	1451478_at	5.7	8.9	4.8	19.1	20.8	12	2.67526	1.41968	0.0217789	angiopoietin-like 7	Angptl7
38364	1454069_at	6.8	5.7	29	38.4	30.6	41.8	2.66988	1.41677	0.0493608	RIKEN cDNA 9030409C19 gene	9030409C19Rik
43694	1459399_at	7.4	3.2	5.4	14.6	10.9	17	2.65625	1.40939	0.0147306
38205	1453910_at	4.4	3.5	11.7	19.1	15.7	16.8	2.63265	1.39652	0.0185711	RIKEN cDNA 4930500A05 gene	4930500A05Rik
711	1416380_at	10.7	19.3	7.8	30.8	27.4	40.8	2.61905	1.38904	0.0183245	Moloney leukemia virus 10	Mov10
22137	1437831_at	6.3	3.3	6.9	18.2	14.1	10.9	2.61818	1.38857	0.0203551	zinc finger, CCHC domain containing 4	Zcchc4
13712	1429406_at	1.8	12.9	12.7	25.9	19.8	26	2.61679	1.3878	0.0245659	solute carrier organic anion transporter family, member 6c1	Slco6c1
18492	1434186_at	6.5	8	13.4	27	30.7	15.2	2.6129	1.38565	0.0428724	lysophosphatidic acid receptor 4	Lpar4
14129	1429823_at	2.9	8.3	1.5	10	13	9.8	2.58268	1.36887	0.044493	sarcoglycan, gamma (dystrophin-associated glycoprotein)	Sgcg
35684	1451389_at	15.4	8.3	26.6	45.6	40.4	43.6	2.57654	1.36544	0.00881928	DnaJ (Hsp40) homolog, subfamily C, member 24	Dnajc24
2815	1418484_at	9.4	4.3	5.6	13.2	21.5	14.6	2.5544	1.35299	0.0286265	tektin 2	Tekt2
23186	1438880_at	32.8	12.4	20.7	40.4	63.6	63.8	2.54628	1.34839	0.0254099	RIKEN cDNA 1700012D14 gene	1700012D14Rik
41055	1456760_at	18.7	10	6.6	23.3	27	39.5	2.54391	1.34705	0.0404782	gastrulation brain homeobox 1	Gbx1
19945	1435639_at	9.9	8.5	18.9	33.2	31.3	29.8	2.52815	1.33808	0.00505044	RIKEN cDNA 2610528A11 gene	2610528A11Rik
41552	1457257_x_at	18.4	31.2	31.7	85.2	62.6	56.5	2.51292	1.32936	0.0136599	poliovirus receptor-related 3	Pvrl3
36634	1452339_at	2.1	8.9	7	13.8	11.5	19.7	2.5	1.32193	0.0470288	a disintegrin-like and metallopeptidase (reprolysin type) with thrombospondin type 1 motif, 7	Adamts7
27249	1442943_at	7	4.4	13.7	21.8	18.3	22.5	2.49402	1.31848	0.0150333	ubiquitin specific peptidase 20	Usp20
44804	1460512_a_at	8.1	1.7	13.1	14.5	19.7	22.7	2.48472	1.31308	0.0498288	leucine-rich repeats and IQ motif containing 4	Lrriq4
23064	1438758_at	101.3	90.8	80.9	207.3	208.3	262.7	2.48462	1.31302	0.00216105	acireductone dioxygenase 1	Adi1
18168	1433862_at	3.2	7.7	16.3	24	25.9	17.5	2.47794	1.30914	0.043772	extra spindle pole bodies 1 (S. cerevisiae)	Espl1
29944	1445638_at	25.3	14.3	19.5	58.1	38.4	49.8	2.47547	1.3077	0.0112631
21331	1437025_at	1.4	2.4	3.3	6.6	5.2	5.7	2.46479	1.30146	0.00716726	CD28 antigen	Cd28
26698	1442392_at	2.6	3.8	3.5	5.4	8.2	10.8	2.46465	1.30138	0.0391564	Mus musculus 0 day neonate thymus cDNA, RIKEN full-length enriched library, clone:A430024M08 product:unclassifiable, full insert sequence. /// /// predicted gene 15866	Gm15866
31893	1447587_at	9.3	4.1	13.6	23	26	16.9	2.44074	1.28732	0.0277677
9055	1424749_at	86.7	116.4	45.9	230.3	202.9	174	2.43855	1.28603	0.0102399	WD repeat and FYVE domain containing 1	Wdfy1
43750	1459455_at	5.4	6.7	19.9	25.3	29.3	23.3	2.43438	1.28355	0.0366832
38629	1454334_at	6.4	4.8	9.3	11.7	15.3	22.8	2.42927	1.28052	0.0502889	zinc finger protein 711	Zfp711
38593	1454298_at	5.6	9.4	1.9	12.8	12.6	15.6	2.42604	1.2786	0.0276068	RIKEN cDNA 4932430A15 gene	4932430A15Rik
34233	1449938_at	25.1	11.7	5.6	41.2	27.7	33.3	2.41038	1.26926	0.0458279	endonuclease, polyU-specific	Endou
30907	1446601_at	9.6	2	10.6	22.8	16.1	14.6	2.40991	1.26898	0.048026
3267	1418936_at	3.6	10.4	4.7	14.6	16.4	14	2.40642	1.26689	0.0170182	v-maf musculoaponeurotic fibrosarcoma oncogene family, protein F (avian)	Maff
21664	1437358_at	116.3	299	162	452.4	553.3	374.4	2.39061	1.25738	0.023883	WD repeat and FYVE domain containing 1	Wdfy1
42231	1457936_at	138.5	131.4	142.2	298.5	323.6	362.2	2.3885	1.2561	0.000530875	mitogen-activated protein kinase 8	Mapk8
15417	1431111_at	4.5	2.3	2.5	7	9.3	5.8	2.37634	1.24874	0.0265471	enolase 1, alpha non-neuron /// enolase 1B, retrotransposed	Eno1
19046	1434740_at	19.2	3.2	8.6	24.1	22.2	27.3	2.37419	1.24744	0.0449823	scavenger receptor class F, member 2	Scarf2
9430	1425124_at	8.4	11.6	10.1	20.2	22	29	2.36545	1.24211	0.00848621	ring finger protein 183	Rnf183
1763	1417432_a_at	593.2	360.4	338.4	997.2	1070.8	980.9	2.35983	1.23868	0.00243841	guanine nucleotide binding protein (G protein), beta 1	Gnb1
30262	1445956_at	2.9	7.2	6.4	15.8	10.9	12.2	2.35758	1.2373	0.0193486
7848	1423542_at	1.5	11.6	7.6	14.7	18.8	15.3	2.35749	1.23725	0.0430475	kallikrein related-peptidase 7 (chymotryptic, stratum corneum)	Klk7
26328	1442022_at	10.4	21.4	20.1	38.3	38.9	44.9	2.3526	1.23426	0.00449661	thymocyte selection associated	Themis
17328	1433022_at	4.5	1.3	3	6.3	7.4	7	2.35227	1.23406	0.0154355	RIKEN cDNA 2310068G24 gene	2310068G24Rik
19894	1435588_at	83.5	164.2	97.7	296.3	277.3	237.9	2.34945	1.23232	0.00680175	WD repeat and FYVE domain containing 1	Wdfy1
17153	1432847_at	11.3	15	9.5	24.7	30.3	29.1	2.34916	1.23215	0.00237296	RIKEN cDNA 2810457G06 gene	2810457G06Rik
5771	1421465_at	5.6	3.8	16.2	22.1	20	17.9	2.34375	1.22882	0.0474161	wingless-type MMTV integration site family, member 2B	Wnt2b
43231	1458936_at	9.2	8.2	6.5	17.6	17	21.4	2.3431	1.22842	0.00252276
32667	1448367_at	30.7	7.4	26.3	59.1	46.9	44.5	2.33696	1.22463	0.0274326	stromal cell derived factor 4	Sdf4
28922	1444616_x_at	12.4	23.6	14.3	44.3	46.1	26.8	2.33002	1.22034	0.0342481
43355	1459060_at	3.3	6.2	16.7	20.1	21.4	19.3	2.32061	1.2145	0.0487117
13446	1429140_at	15.6	9.2	20	35	26	42.5	2.31027	1.20806	0.0265857	spinster homolog 3	Spns3
28469	1444163_at	22.2	4.1	11.5	28.4	30.9	27.8	2.30423	1.20429	0.0370033	NIMA (never in mitosis gene a)-related expressed kinase 5	Nek5
15719	1431413_at	36.8	28.9	41	86.1	79	80.4	2.30084	1.20216	0.000371457	receptor (calcitonin) activity modifying protein 1	Ramp1
28838	1444532_at	5.3	8.5	14.8	23.6	19	23.2	2.3007	1.20207	0.017094	nicastrin	Ncstn
41618	1457323_at	33.8	14.6	35.3	55.4	78.9	58	2.29749	1.20006	0.0222615	single-pass membrane protein with coiled-coil domains 3	Smco3
27980	1443674_at	5.1	6.1	9	11.6	16	18.7	2.29208	1.19666	0.0215712
28881	1444575_at	38.1	27.6	43.6	78	88.2	83.9	2.2882	1.19421	0.00106918
3143	1418812_a_at	5.5	11.4	4.7	18.5	19.1	11.8	2.28704	1.19348	0.0424087	BarH-like 1 (Drosophila)	Barhl1
31845	1447539_at	0.8	1	1	1.8	1.7	2.9	2.28571	1.19265	0.0370869
36625	1452330_a_at	86.5	45.3	42.4	138.2	126.8	133	2.28473	1.19202	0.00696579	matrix-remodelling associated 8	Mxra8
39043	1454748_at	3.2	18	18.2	24.3	31.4	34.2	2.28173	1.19013	0.0434692	nicotinate phosphoribosyltransferase domain containing 1	Naprt1
14237	1429931_at	5.7	24.2	11.2	31.1	26.4	36.1	2.27737	1.18737	0.0467909	RIKEN cDNA 4930553P18 gene	4930553P18Rik
37658	1453363_at	19.7	49.2	11.1	54.9	59	68.1	2.275	1.18587	0.0492211	calcium channel, voltage-dependent, gamma subunit 2	Cacng2
32486	1448186_at	1.4	4.3	2.8	5.2	6.3	7.8	2.27059	1.18307	0.0330303	pancreatic lipase-related protein 2	Pnliprp2
38597	1454302_at	16.2	21.4	12.7	41.4	31.9	40.8	2.26839	1.18167	0.00589967	RIKEN cDNA 5730410E19 gene	5730410E19Rik
26045	1441739_at	6.3	7.7	23.9	27.7	29.4	28.8	2.26649	1.18046	0.0477303
24239	1439933_at	26.5	10.9	20.9	46.5	47.9	37.7	2.26587	1.18006	0.0115318	RIKEN cDNA B430316J06 gene	B430316J06Rik
19712	1435406_at	11.6	19.5	15.1	23.8	38.9	41.8	2.2619	1.17754	0.0321913	coiled-coil alpha-helical rod protein 1	Cchcr1
37537	1453242_x_at	8.4	11.7	17	28.6	24.6	30.1	2.24528	1.1669	0.00678081	RIKEN cDNA 2810047C21 gene 1	2810047C21Rik1
15797	1431491_at	6.9	8.8	11.8	23.4	22.1	16.2	2.24364	1.16584	0.012382	RIKEN cDNA 9430087N24 gene	9430087N24Rik
10451	1426145_at	10.7	3.3	9.4	19.7	18.9	13.7	2.23504	1.1603	0.0311302
35978	1451683_x_at	22.1	13.3	21.8	39.5	39.6	47.9	2.22028	1.15074	0.00438312	histocompatibility 2, D region locus 1	H2-D1
14544	1430238_at	6.1	9.9	5.5	16.7	17.4	13.4	2.2093	1.14359	0.00939757	glutamic-oxaloacetic transaminase 1-like 1	Got1l1
37339	1453044_at	18.2	13.4	23.1	42.9	47.8	29.1	2.19013	1.13102	0.0256608	RIKEN cDNA C030014I23 gene /// uncharacterized LOC102641249	C030014I23Rik
26073	1441767_at	16.7	44.8	31.8	55	74.5	74.4	2.18542	1.12791	0.0238373	zinc finger protein 142	Zfp142
15596	1431290_at	11	7.3	5.2	18.9	17.6	14.6	2.17447	1.12066	0.012262	RIKEN cDNA 4930588J15 gene	4930588J15Rik
26219	1441913_at	4.3	17.9	20.8	28.5	28.3	36.5	2.16977	1.11754	0.0436081	leucine zipper protein 2	Luzp2
35628	1451333_a_at	28.1	11.5	12.7	42.2	37.5	32.5	2.14532	1.10119	0.0296797	proacrosin binding protein	Acrbp
26888	1442582_at	0.5	0.8	0.9	1.7	1.2	1.8	2.13636	1.09516	0.0196233	germinal center associated, signaling and motility	Gcsam
15981	1431675_a_at	12.1	36.8	30.7	69.5	45.9	54.6	2.13568	1.09469	0.0409813	general transcription factor II I	Gtf2i
30044	1445738_at	13.1	25.5	15.2	49.8	34.6	29.9	2.12454	1.08715	0.0472971
30093	1445787_at	13.9	12.7	14.6	33.9	24.2	29.4	2.12379	1.08664	0.00568459	coiled-coil domain containing 162	Ccdc162
26241	1441935_at	13.9	10.1	6.7	24.5	20.8	19.6	2.11401	1.07998	0.0110591	ankyrin repeat, family A (RFXANK-like), 2	Ankra2
25322	1441016_at	11.1	10.2	12.3	22.4	27.6	21	2.1131	1.07936	0.0040219
37721	1453426_a_at	29.1	36.4	10.3	51.4	59	49.4	2.10818	1.076	0.0280179	WD repeat and FYVE domain containing 1	Wdfy1
20559	1436253_at	17.2	23.3	19.9	43	31.9	52.4	2.10762	1.07561	0.0226104	peroxisomal biogenesis factor 16	Pex16
22858	1438552_x_at	3.1	2	3.3	4.4	5.4	7.9	2.10714	1.07529	0.0500008	zyxin	Zyx
2969	1418638_at	18.2	17.5	10.2	37.9	26.4	31.9	2.09586	1.06754	0.0161317	histocompatibility 2, class II, locus Mb1 /// histocompatibility 2, class II, locus Mb2 /// uncharacterized LOC102642102	H2-DMb1
19280	1434974_at	5.8	10.2	6.1	18.5	13.5	14.2	2.0905	1.06385	0.0190243	pyruvate dehydrogenase kinase, isoenzyme 1	Pdk1
7728	1423422_at	5.4	17.7	15.9	27.6	26.9	27	2.08974	1.06333	0.0210609	ankyrin repeat and SOCS box-containing 4	Asb4
29894	1445588_at	6.9	4.9	7.2	16.4	9.1	14.1	2.08421	1.0595	0.0391025	ankyrin repeat domain 44	Ankrd44
19671	1435365_at	17.5	4.8	19.5	32.7	30.4	23.9	2.08134	1.05751	0.0468349	spermatogenesis associated 33	Spata33
8862	1424556_at	27.1	20.9	16.2	36.4	58.4	38.6	2.07788	1.05511	0.0397243	pyrroline-5-carboxylate reductase 1	Pycr1
43405	1459110_at	23.2	17.5	14.5	37.1	37.4	40.1	2.07609	1.05387	0.00190281	myosin IXb	Myo9b
43232	1458937_at	10.2	4.4	4.6	15.7	10.3	13.7	2.06771	1.04803	0.0504735	TSPY-like 4	Tspyl4
1276	1416945_at	29.3	55.4	48.7	89.6	99.1	86.6	2.06372	1.04525	0.00552216	prostate tumor over expressed gene 1	Ptov1
29755	1445449_at	17.7	18.7	9.2	25.2	29.8	39.1	2.0636	1.04516	0.0334408
23381	1439075_at	98.5	84.4	104.6	212	234.7	146.5	2.0633	1.04496	0.0197954	polymerase (RNA) III (DNA directed) polypeptide F	Polr3f
8120	1423814_at	36.8	38.3	28.3	76.8	71.2	64.2	2.05222	1.03719	0.00163612	DEAD (Asp-Glu-Ala-Asp) box polypeptide 41	Ddx41
20438	1436132_at	12.4	28.8	41.2	48.1	54.3	66.6	2.05097	1.03631	0.0441415	suppressor of glucose, autophagy associated 1	Soga1
31204	1446898_at	10.1	22.6	24.3	34.1	48.9	33.4	2.04211	1.03006	0.0427048
22407	1438101_at	16.3	20.1	20.5	47.7	35.4	32.7	2.03515	1.02513	0.0150383	frizzled homolog 3 (Drosophila)	Fzd3
22219	1437913_at	12.8	9.2	10.7	26.9	24.4	15.2	2.03364	1.02406	0.0384396	B cell leukemia/lymphoma 2 related protein A1a /// B cell leukemia/lymphoma 2 related protein A1b /// B cell leukemia/lymphoma 2 related protein A1d	Bcl2a1d
21207	1436901_at	18.8	11	9.7	24.5	32.7	22.9	2.02785	1.01995	0.0312314	notch 4	Notch4
6585	1422279_at	35.3	41.6	46.7	81.4	77.1	91.1	2.01942	1.01394	0.00136536	Friend virus susceptibility 1	Fv1
31887	1447581_at	12.9	23.5	27.4	39	39.5	49.9	2.01254	1.00902	0.0184071
12307	1428001_at	1.7	7.7	6.9	11.2	10.1	11.5	2.01227	1.00882	0.0463001	thyroid stimulating hormone receptor	Tshr
32294	1447988_at	54.2	31.2	36.7	75.9	78.8	90.4	2.00737	1.00531	0.00758259
41987	1457692_at	37.9	34.4	23.8	48.2	78.4	66.2	2.00624	1.0045	0.0296901
28962	1444656_at	16.4	14	4.4	24.8	19.9	24.9	2	1	0.0447734	cDNA sequence BC030499	BC030499
8158	1423852_at	49.4	60.5	59.7	114.6	117.2	107.2	1.99882	0.999149	0.000266881	shisa homolog 2 (Xenopus laevis)	Shisa2
13215	1428909_at	29.7	27.3	18.6	59.2	52.9	39	1.99868	0.999046	0.0213572	RIKEN cDNA A130040M12 gene	A130040M12Rik
28237	1443931_at	24.5	16	20	44	43	33.9	1.99835	0.998807	0.00760274	zinc finger protein 882	Zfp882
14133	1429827_at	22.6	30.7	9.3	36.7	42	46.1	1.99361	0.995383	0.0381602	RIKEN cDNA 1700010B08 gene	1700010B08Rik
37000	1452705_at	160	171	163	334.7	308.6	340.2	1.99089	0.993414	9.22586e-05	pyridoxal-dependent decarboxylase domain containing 1	Pdxdc1
41815	1457520_at	19.7	25.7	23.5	42.8	33.8	58.8	1.96517	0.974652	0.0420277
33090	1448790_at	38.2	55.3	33.7	73.6	88.7	87.4	1.96305	0.973097	0.00747786	sema domain, transmembrane domain (TM), and cytoplasmic domain, (semaphorin) 6B	Sema6b
6273	1421967_at	9.8	7.4	9.3	16.8	14.6	20.5	1.95849	0.969742	0.0106011	UDP-Gal:betaGlcNAc beta 1,4-galactosyltransferase, polypeptide 5	B4galt5
28585	1444279_at	27.7	27	39.1	71.5	65.4	46.7	1.95736	0.968906	0.0237704	HECT, UBA and WWE domain containing 1	Huwe1
25403	1441097_at	18.9	13	25.2	44.8	30.8	35.8	1.95096	0.964187	0.0285587	vang-like 1 (van gogh, Drosophila)	Vangl1
29405	1445099_at	8.7	8.3	14.3	21	17.7	22.2	1.94569	0.96028	0.0138737
3844	1419513_a_at	4.5	9.9	7.5	13.2	11.6	17.8	1.94521	0.959923	0.046759	ect2 oncogene	Ect2
7885	1423579_a_at	21	18	21.3	42.1	32.1	42.9	1.94196	0.957511	0.00644967	transient receptor potential cation channel, subfamily C, member 4	Trpc4
5276	1420970_at	5.2	2.7	6.1	7.9	11.1	8.1	1.93571	0.952866	0.0395773	adenylate cyclase 7	Adcy7
27272	1442966_at	14	14.6	12.2	32.7	20.9	25.3	1.93382	0.951456	0.0225477
24912	1440606_at	13.3	13.8	19.1	34.3	29.7	25.1	1.92857	0.947533	0.0115666
15986	1431680_a_at	7.4	12.4	13.7	21.9	15.8	26.8	1.92537	0.945138	0.049792	protein tyrosine phosphatase, receptor type, K	Ptprk
43671	1459376_at	83.9	98.8	97.4	168.7	175.2	194.2	1.9211	0.941932	0.000671512
25871	1441565_at	20.1	16	34.2	43	50.1	41.8	1.91892	0.940294	0.024104
9734	1425428_at	35.3	52.9	65.6	105.3	87.6	101.9	1.91678	0.938681	0.0103974	hypoxia inducible factor 3, alpha subunit	Hif3a
29110	1444804_at	4.7	5.9	9.8	15.3	11.8	11.9	1.91176	0.934905	0.032093	DNA segment, Chr 17, ERATO Doi 96, expressed	D17Ertd96e
19596	1435290_x_at	7.2	14	20.5	29.5	24.9	25.2	1.90887	0.932721	0.0373494	histocompatibility 2, class II antigen A, alpha	H2-Aa
42279	1457984_at	55.4	57.2	102.7	122.8	132.5	155.6	1.9085	0.932439	0.0234408	corticotropin releasing hormone	Crh
44342	1460049_s_at	20.9	22.6	25.5	30.4	55.6	45.5	1.9058	0.930395	0.0488834	RIKEN cDNA 1500015O10 gene	1500015O10Rik
9700	1425394_at	15.5	9.2	16.5	29.9	25.7	22.9	1.90534	0.930048	0.0152957	cDNA sequence BC023105	BC023105
35319	1451024_at	18.2	12.8	12.8	34	21.7	27.6	1.90183	0.927386	0.029745	sphingosine-1-phosphate receptor 4	S1pr4
13733	1429427_s_at	32.9	37.1	49.7	61.7	99.2	66	1.89557	0.922633	0.0500971	transcription factor 7 like 2, T cell specific, HMG box	Tcf7l2
25510	1441204_at	3.2	10.4	10.6	15.1	15.2	15.5	1.89256	0.920341	0.0417832	RIKEN cDNA A130019P10 gene	A130019P10Rik
40980	1456685_at	163.8	176.4	191.6	364.4	297.1	344.4	1.8915	0.919531	0.00182807	neuron specific gene family member 2	Nsg2
41746	1457451_at	9.8	12.2	12	25.2	19.8	19.3	1.89118	0.919284	0.00774687
1516	1417185_at	475.4	381.4	305.6	787	853.1	555.2	1.88859	0.917311	0.0285983	lymphocyte antigen 6 complex, locus A	Ly6a
12700	1428394_at	58.8	98.8	70.9	144.8	131.8	154.6	1.88709	0.916163	0.0075822	leucine rich repeat containing 8A /// phytanoyl-CoA dioxygenase domain containing 1	Lrrc8a
28474	1444168_at	18.7	9.6	27	39.1	31.2	34	1.88608	0.915388	0.0418494	xenotropic and polytropic retrovirus receptor 1	Xpr1
41843	1457548_at	13.6	6.5	20.2	25.9	23.9	25.8	1.87593	0.907606	0.0425944	a disintegrin-like and metallopeptidase (reprolysin type) with thrombospondin type 1 motif, 6	Adamts6
25945	1441639_at	23.1	21.7	8.8	30.6	29.7	40	1.87127	0.904017	0.0502876	zinc finger, CCHC domain containing 8	Zcchc8
22142	1437836_x_at	12.4	22	16.9	36.5	34.5	24.7	1.8655	0.89956	0.031948	AAR2 splicing factor homolog (S. cerevisiae)	Aar2
38903	1454608_x_at	1264.4	1543.4	2192.9	3659.7	2597.4	3061.7	1.8635	0.898014	0.0251456	transthyretin	Ttr
28171	1443865_at	180.6	187.3	212.2	349.1	358.1	368.5	1.85434	0.890902	0.000119882	gamma-aminobutyric acid (GABA) A receptor, subunit alpha 2	Gabra2
34551	1450256_at	2.9	2.8	3.2	5.8	4.9	5.8	1.85393	0.890589	0.00143036	cerberus 1 homolog (Xenopus laevis)	Cer1
17352	1433046_at	1.3	1.5	1.9	2.6	3.7	2.4	1.85106	0.888355	0.0390205	RIKEN cDNA 4930535F04 gene	4930535F04Rik
25808	1441502_at	46.7	28.9	50.4	91.6	74.7	66.6	1.84841	0.886287	0.0228715
19271	1434965_at	33.5	37.5	35.2	56.5	59.5	79.3	1.83898	0.878908	0.0148669	R3H domain and coiled-coil containing 1 like	R3hcc1l
24249	1439943_at	23.3	21.1	27.3	37.1	48.6	46	1.83682	0.87721	0.00701325	vacuolar protein sorting 54 (yeast)	Vps54
38991	1454696_at	1930.1	1386	1168.1	2805.3	2689.5	2726.7	1.83344	0.874551	0.00555565	guanine nucleotide binding protein (G protein), beta 1	Gnb1
43386	1459091_at	11.1	11.3	4.6	14.9	17.7	16.8	1.82963	0.871552	0.0336398
43731	1459436_at	3.3	7	5.3	10.5	8	10	1.82692	0.869416	0.0307201
44032	1459737_s_at	865.5	880.8	1296.5	2078.4	1546.1	1920.7	1.8224	0.86584	0.0169795	transthyretin	Ttr
28992	1444686_at	6.6	3.6	6.9	12.4	9.3	9.4	1.81871	0.862918	0.0333192	family with sequence similarity 173, member B	Fam173b
12020	1427714_at	7.5	4.8	10.6	14.9	15	11.7	1.81659	0.861236	0.0354027	SET and MYND domain containing 1	Smyd1
10693	1426387_x_at	526.3	438.7	358.2	627.4	983.2	783.8	1.80955	0.855633	0.034953	phosphatidylserine decarboxylase /// phosphatidylserine decarboxylase, pseudogene 1 /// phosphatidylserine decarboxylase, pseudogene 3	Pisd
5279	1420973_at	37.8	40.4	51.2	74.6	60.1	99.2	1.80757	0.854054	0.0453604	AT rich interactive domain 5B (MRF1-like)	Arid5b
36712	1452417_x_at	5.7	4.7	10.7	13.3	12.9	11.8	1.80095	0.848756	0.0419519	immunoglobulin kappa chain variable 28 (V28) /// immunoglobulin kappa constant /// immunoglobulin kappa joining 1 /// immunoglobulin kappa variable 4-53 /// immunoglobulin kappa variable 6-23 /// immunoglobulin kappa chain variable 8-30	Igk-V28
4996	1420690_at	5.4	13.3	14.7	19.8	19.9	20.3	1.79641	0.845114	0.0377144	fibroblast growth factor 10	Fgf10
43752	1459457_at	31.2	23.3	45.6	56.7	62.9	60	1.79421	0.843345	0.0173237	calcium/calmodulin-dependent protein kinase II, delta	Camk2d
28078	1443772_at	83.9	81.6	79.8	145.9	122.8	171.1	1.79291	0.8423	0.00979481	DAZ interacting protein 1	Dzip1
10387	1426081_a_at	137.4	111.1	95	199.8	218.1	195.7	1.78632	0.836988	0.00312471	deiodinase, iodothyronine, type II	Dio2
39739	1455444_at	373.3	463.9	562.1	858.5	890.7	747.8	1.78446	0.835491	0.00626827	gamma-aminobutyric acid (GABA) A receptor, subunit alpha 2	Gabra2
20509	1436203_a_at	16.4	15.2	10.8	27.4	25.1	23.1	1.78302	0.834322	0.00629141	RIKEN cDNA 1110059G02 gene /// syntrophin, basic 1	1110059G02Rik
39199	1454904_at	114.4	114.3	109.3	146.5	248.5	207.5	1.78254	0.833938	0.0411238	X-linked myotubular myopathy gene 1	Mtm1
41381	1457086_at	9.7	13.2	16.2	18.8	25.5	25.3	1.78005	0.831919	0.0245855	RIKEN cDNA D930028M14 gene	D930028M14Rik
35875	1451580_a_at	314.2	374.3	537.9	801.4	704.6	674.5	1.77797	0.830229	0.0145078	transthyretin	Ttr
40208	1455913_x_at	676.8	888.1	1095	1922.8	1296.2	1507.9	1.7771	0.829522	0.0351682	transthyretin	Ttr
4057	1419726_at	5.9	10.4	7.9	16.6	12.4	14	1.77686	0.82933	0.0247291	a disintegrin and metallopeptidase domain 18	Adam18
11666	1427360_at	21.9	19.1	17.2	31.3	39.9	31.9	1.77148	0.824953	0.0083778	RIKEN cDNA 4930507D05 gene	4930507D05Rik
5413	1421107_at	34.2	29.9	19.9	50	44.2	54.1	1.76548	0.820057	0.0138281	serine/threonine kinase 4	Stk4
16454	1432148_at	0.7	0.5	0.5	1.2	1	0.8	1.76471	0.819428	0.0313757	RIKEN cDNA 4930533K18 gene	4930533K18Rik
39769	1455474_at	27.7	24.1	23.8	48.7	37.4	47.3	1.76455	0.819301	0.00693588	family with sequence similarity 21	Fam21
42442	1458147_at	58.6	60.6	69.3	118.3	92	122.3	1.76446	0.819224	0.00879534
27168	1442862_at	28.9	44.6	27	56.7	69.4	50.3	1.75522	0.811655	0.0329794
18586	1434280_at	92.9	87	94.7	153.1	183	145.8	1.75492	0.811402	0.00400574	Mus musculus 8 days embryo whole body cDNA, RIKEN full-length enriched library, clone:5730463B09 product:unclassifiable, full insert sequence.	AK134344
37898	1453603_at	15.4	11.6	15.5	28.6	27.2	18.7	1.75294	0.809778	0.0333732	RIKEN cDNA 2700022O18 gene	2700022O18Rik
40183	1455888_at	48.1	48	56.3	68.5	93.5	104.1	1.74606	0.804106	0.0254626	leucine rich repeat and Ig domain containing 2	Lingo2
6562	1422256_at	102.1	63.3	97.2	147.4	129.2	179.9	1.73839	0.797748	0.0281469	somatostatin receptor 2	Sstr2
6044	1421738_at	257.9	356.2	336.6	554.8	579	515.2	1.73451	0.794529	0.00274802	gamma-aminobutyric acid (GABA) A receptor, subunit alpha 2	Gabra2
43904	1459609_at	16.8	27.4	20.3	36.5	35.1	40.2	1.73333	0.793549	0.0104629
20923	1436617_at	125.2	104.8	116.1	213.6	193.6	191.4	1.72956	0.790403	0.000793171	centrin 4	Cetn4
31061	1446755_at	67.6	68	64.5	104.6	109.7	131.7	1.72914	0.790051	0.0044002
15547	1431241_at	32.1	42.8	39.7	58.4	78.5	61.2	1.72862	0.789622	0.0167951	coiled-coil-helix-coiled-coil-helix domain containing 3	Chchd3
20678	1436372_a_at	55.6	103.2	91.4	166.3	128.9	136.6	1.72582	0.787281	0.0297052	pyridoxal-dependent decarboxylase domain containing 1	Pdxdc1
15531	1431225_at	181.2	207.3	203.3	268.3	393.2	359.6	1.72541	0.786943	0.0199953
9861	1425555_at	13.1	9.1	16	21.7	23.3	20.8	1.72251	0.784515	0.0124485	cyclin-dependent kinase 12	Cdk12
43127	1458832_at	10.3	14.1	14.9	22.6	21	23.9	1.71756	0.780358	0.00467255
6656	1422350_at	8.2	9	9	15.1	11.9	18	1.71756	0.780358	0.0245109	formyl peptide receptor, related sequence 3	Fpr-rs3
39787	1455492_at	31.5	37.5	28.5	54.4	52.1	60.6	1.71385	0.777238	0.00319264	RIKEN cDNA B330016D10 gene	B330016D10Rik
22172	1437866_at	36.6	28.9	49.6	74	63.8	59	1.70982	0.773842	0.0220102	dual specificity phosphatase 18	Dusp18
2028	1417697_at	49.3	44.7	51	99.9	68.5	79	1.70621	0.770793	0.0222769	sterol O-acyltransferase 1	Soat1
27701	1443395_at	1	0.8	1.2	1.3	2	1.8	1.7	0.765535	0.0423643	DNA segment, Chr 6, ERATO Doi 490, expressed	D6Ertd490e
18584	1434278_at	285.7	260.1	342.9	462.9	600.4	446.5	1.69889	0.764589	0.0192285	X-linked myotubular myopathy gene 1	Mtm1
35642	1451347_at	23	26.9	28.5	46.1	44	42.8	1.69515	0.761416	0.000664045	INO80 complex subunit E	Ino80e
42384	1458089_at	22	36.1	33.4	42	63	50.1	1.69508	0.761355	0.0472753
8848	1424542_at	17.7	30.1	26.5	44.6	41.1	40.2	1.69448	0.760844	0.0118021	S100 calcium binding protein A4	S100a4
9366	1425060_s_at	25.9	21	29.9	47.1	32.5	50.3	1.69141	0.758223	0.04306	CAP-GLY domain containing linker protein 1	Clip1
27180	1442874_at	17.5	9.8	12.8	23.5	24.5	19.7	1.68828	0.755554	0.0263306
31934	1447628_x_at	25.3	13.7	29.6	38.7	41.1	36	1.68805	0.755355	0.0340342	mitochondrial ribosomal protein S5	Mrps5
42801	1458506_at	20.9	13.4	17.2	25.1	34.5	27.2	1.68544	0.753123	0.0302553	predicted gene 626	Gm626
7368	1423062_at	25.1	17.8	30.9	37.6	36.3	50.3	1.68293	0.750972	0.045548	insulin-like growth factor binding protein 3	Igfbp3
13705	1429399_at	27.4	41.6	35.1	58.1	51.1	65.9	1.68204	0.750209	0.0162126	ring finger protein 125	Rnf125
31763	1447457_at	12.2	11.5	8.3	21.2	15.5	17.1	1.68125	0.749534	0.0250029	uncharacterized LOC102639518	LOC102639518
36079	1451784_x_at	119.9	132.5	95.7	206.2	173.1	205.7	1.68055	0.748935	0.00681627	histocompatibility 2, D region locus 1	H2-D1
11062	1426756_at	125.3	149.8	134.1	252.5	173.9	260.2	1.67791	0.746664	0.0315033	UDP-N-acetyl-alpha-D-galactosamine:polypeptide N-acetylgalactosaminyltransferase 2	Galnt2
5032	1420726_x_at	23.4	21	32.2	51.8	38.3	38.4	1.67755	0.746352	0.0371823	trimethyllysine hydroxylase, epsilon	Tmlhe
18686	1434380_at	45	57.3	28.8	61.1	80.8	77.5	1.67353	0.742896	0.045495	guanylate binding protein 7	Gbp7
2883	1418552_at	8	7.9	5.4	10.8	14.8	10	1.67136	0.741024	0.0495254	opsin 1 (cone pigments), short-wave-sensitive (color blindness, tritan)	Opn1sw
15367	1431061_s_at	108.9	119.4	138.5	228.3	203.2	181	1.66985	0.739716	0.00716902	pellino 1	Peli1
24757	1440451_at	21.2	13.9	23.1	30.2	28.3	38.6	1.66838	0.738452	0.0374131	ankyrin repeat domain 66	Ankrd66
10521	1426215_at	138	189.6	166.8	245.6	315.7	262.1	1.66545	0.735915	0.0133183	dopa decarboxylase	Ddc
5962	1421656_at	22.7	22.9	19.5	38.5	37.3	32.6	1.66513	0.735635	0.00239203	sprouty homolog 2 (Drosophila)	Spry2
19289	1434983_at	10.2	15.8	10.7	16.9	24.2	19.9	1.66213	0.733029	0.043194	coiled-coil domain containing 108	Ccdc108
42189	1457894_at	28.6	19.7	32.4	50.2	36.2	47.7	1.66171	0.732669	0.035853	methyltransferase like 11B	Mettl11b
38135	1453840_at	18.5	20.3	10.8	30	29.2	23.1	1.65927	0.730552	0.0400962	poly(A) binding protein, cytoplasmic 1	Pabpc1
24554	1440248_at	62.5	54	71.4	98.4	107	105.4	1.65407	0.726021	0.00195314	cancer susceptibility candidate 4	Casc4
4024	1419693_at	22.4	15.6	27.7	40.5	36	32.1	1.65297	0.725059	0.0284028	collectin sub-family member 12	Colec12
16862	1432556_a_at	32.3	28.8	41.7	55.3	60.8	53.8	1.65272	0.724846	0.0070657	family with sequence similarity 183, member B	Fam183b
10825	1426519_at	151.9	118.4	121.7	226.2	247.3	173.4	1.65026	0.722689	0.0253862	procollagen-proline, 2-oxoglutarate 4-dioxygenase (proline 4-hydroxylase), alpha 1 polypeptide	P4ha1
28185	1443879_at	13	9.4	16.4	20.8	18.7	24.5	1.64948	0.722015	0.0333987	mesoderm induction early response 1 homolog (Xenopus laevis	Mier1
25458	1441152_at	39.4	25.8	28.5	50.9	50.4	53.1	1.64781	0.720552	0.00881956
39655	1455360_at	33.1	26.7	53.6	65.6	56.8	64.2	1.6455	0.718528	0.0463767	solute carrier family 38, member 9	Slc38a9
3268	1418937_at	359.7	285.1	215.2	418.2	512.4	473	1.63209	0.706723	0.0220877	deiodinase, iodothyronine, type II	Dio2
19382	1435076_at	45.1	51.7	50.1	87.9	84.3	67.4	1.63104	0.705794	0.00955799	family with sequence similarity 57, member A	Fam57a
29385	1445079_at	22.7	47.6	37.5	59.8	57.6	58.4	1.6308	0.705578	0.0354402
19863	1435557_at	10.8	14.2	9.3	17.2	15.9	22.8	1.62974	0.70464	0.0484954	formin homology 2 domain containing 1	Fhod1
11258	1426952_at	66.1	79.7	108.9	112.3	144.5	158	1.62858	0.703617	0.0449758	Rho GTPase activating protein 18	Arhgap18
41304	1457009_at	64.6	43.3	30.1	72	73.5	79.2	1.62826	0.703332	0.0483463	Rho-related BTB domain containing 3	Rhobtb3
34729	1450434_s_at	38	37.7	52.6	73.2	70.7	65	1.62822	0.703291	0.00804666	phosphate cytidylyltransferase 1, choline, alpha isoform	Pcyt1a
23487	1439181_at	35.4	51.8	51.3	80.1	65.1	80.3	1.62816	0.703241	0.0170445	zinc finger protein 658	Zfp658
31311	1447005_at	22.8	17.1	22.1	38.3	27.3	35.2	1.62581	0.701156	0.0257365
42423	1458128_at	42.8	58.9	47.1	82.3	90	69.5	1.625	0.70044	0.0156162	KAT8 regulatory NSL complex subunit 1-like	Kansl1l
408	1416077_at	26.1	16.1	16.3	29.3	31.5	34.2	1.62393	0.699491	0.0275978	adrenomedullin	Adm
27367	1443061_at	11.7	21.7	18.4	26.6	25.6	31.9	1.62355	0.699154	0.0380932
44818	1460526_at	26.6	17.8	15.6	32.2	33.3	31.9	1.62333	0.698959	0.0211982	RIKEN cDNA 4833420L08 gene	4833420L08Rik
21864	1437558_at	113.9	96.9	113.9	156.5	175	195.1	1.6218	0.6976	0.00575957
13984	1429678_at	135.2	117.5	101.7	213.3	209	151.5	1.61907	0.695169	0.0298742	RIKEN cDNA 5730508B09 gene	5730508B09Rik
43590	1459295_at	21.9	12.8	20.2	26.7	30.7	31.3	1.61566	0.692128	0.0231058
12664	1428358_at	19	15.6	13.8	25.8	28.3	24	1.61364	0.690316	0.00735064	zymogen granule protein 16	Zg16
8449	1424143_a_at	23.1	16.2	16.8	31.2	24.6	34.6	1.61141	0.688322	0.0357621	chromatin licensing and DNA replication factor 1	Cdt1
28398	1444092_at	89.7	73	120.9	158	147	151.5	1.60966	0.686757	0.016083	zinc finger protein 939	Zfp939
38010	1453715_at	35.1	26.7	32.8	54.3	49.4	48.4	1.60782	0.685108	0.00347349	synaptic vesicle glycoprotein 2c	Sv2c
26618	1442312_at	36.2	38.1	39	65.4	69.3	47.3	1.60635	0.683791	0.0284615	transducin (beta)-like 1X-linked receptor 1	Tbl1xr1
7259	1422953_at	29.6	29.2	23	34.3	44.3	52.7	1.60513	0.682694	0.0450638	formyl peptide receptor 2	Fpr2
14845	1430539_at	24.7	16.2	21.2	38.4	31.3	29.8	1.60225	0.680103	0.0262439	matrix-remodelling associated 7	Mxra7
27128	1442822_at	50.9	75.2	50.1	95.6	107.9	78.7	1.60159	0.679504	0.0402685
38304	1454009_at	16.1	13.5	14.9	24.2	19.6	27.4	1.6	0.678072	0.0202715	RIKEN cDNA 1700008O03 gene	1700008O03Rik
37363	1453068_at	132.1	138	95.6	200.7	170.2	211.6	1.59284	0.671597	0.0163707	PR domain containing 2, with ZNF domain	Prdm2
9851	1425545_x_at	201.8	139.3	113.1	266.3	235.9	220.1	1.59027	0.66927	0.0391879	histocompatibility 2, D region locus 1 /// histocompatibility 2, D region locus L	H2-L
41790	1457495_at	89.8	79.2	112	163.8	147.9	134.2	1.58683	0.66615	0.0130605	RIKEN cDNA 2900052N01 gene	2900052N01Rik
22241	1437935_at	43.2	56.6	58.7	93.7	91.6	65.2	1.58044	0.660328	0.0417369	meiosis-specific, MEI4 homolog (S. cerevisiae)	Mei4
19469	1435163_at	214.4	207.6	229.9	365	353.5	310.9	1.57908	0.659081	0.00208111	zinc finger protein 871	Zfp871
37207	1452912_at	8	8.2	11.1	11.3	16.1	15.7	1.57875	0.658787	0.045474	defective in sister chromatid cohesion 1 homolog (S. cerevisiae)	Dscc1
24604	1440298_at	2	1.9	1.7	2.7	2.9	3.2	1.57143	0.652077	0.0032911	triggering receptor expressed on myeloid cells-like 2	Treml2
37645	1453350_at	36.7	37.1	45.6	60.9	64.5	62.1	1.57035	0.651088	0.00182659	upregulator of cell proliferation	Urgcp
31619	1447313_at	26.8	28.8	25.2	48.6	40.4	37.3	1.56312	0.644427	0.0126579
41015	1456720_at	27.8	33.5	25.6	42.7	39	54	1.56157	0.642993	0.0330082
40160	1455865_at	89.1	86.3	139.9	159.5	171.1	160.9	1.55883	0.640466	0.0299348	insulinoma-associated 1	Insm1
4235	1419916_at	26.3	33.5	28.5	49.2	44.3	44.1	1.55832	0.639995	0.00371091	ring finger protein 20	Rnf20
21342	1437036_at	23	21.1	22.8	37.4	38.2	28.3	1.55306	0.635118	0.0188387	staphylococcal nuclease and tudor domain containing 1	Snd1
4852	1420546_at	50	37.7	48.7	80.8	76	55	1.55279	0.634859	0.0465775	tyrosine hydroxylase	Th
40421	1456126_at	34.9	33.7	45.6	67.3	53.7	56.3	1.55254	0.63463	0.0201759	mucosa associated lymphoid tissue lymphoma translocation gene 1	Malt1
29293	1444987_at	35.8	27.5	29.4	54.1	46.6	43.2	1.55232	0.634425	0.0139194	cathepsin B	Ctsb
16758	1432452_at	22.1	23.7	15.8	26	32.3	37.3	1.55195	0.63408	0.0493178	RIKEN cDNA 1700054O19 gene	1700054O19Rik
35537	1451242_a_at	145.1	136.7	147.7	187	227.1	251.3	1.54924	0.631564	0.0144991	protein phosphatase 5, catalytic subunit	Ppp5c
24597	1440291_at	24.5	15.9	14.2	28	30.5	26	1.54762	0.63005	0.0443695
21200	1436894_at	36.4	34.5	29.7	42.7	53.8	59	1.54573	0.628284	0.0245277	immunoglobulin-like domain containing receptor 2	Ildr2
39481	1455186_a_at	43	38	29.8	60.5	59.6	51.1	1.54513	0.627725	0.0145017	urate (5-hydroxyiso-) hydrolase	Urah
18585	1434279_at	75.4	82.1	92.9	99.9	136.4	149.3	1.53994	0.62287	0.0450018	Mus musculus 8 days embryo whole body cDNA, RIKEN full-length enriched library, clone:5730463B09 product:unclassifiable, full insert sequence.	AK134344
36354	1452059_at	99.3	89	95.2	119.2	157.9	158.5	1.53651	0.619655	0.0191004	solute carrier family 35, member F5	Slc35f5
185	1415854_at	35	40.2	29.6	53.9	63.3	43.7	1.53531	0.618526	0.0438331	kit ligand	Kitl
9642	1425336_x_at	138.9	120.4	136.7	197.1	176.3	233.1	1.53157	0.615007	0.0162702	histocompatibility 2, K1, K region	H2-K1
35720	1451425_a_at	142.9	190.1	206.4	255.2	308	262.7	1.53115	0.614612	0.01925	makorin, ring finger protein, 1	Mkrn1
19039	1434733_at	37.5	34.5	33.4	58.4	55.9	46.8	1.52846	0.612082	0.00762114	serine/threonine kinase 36	Stk36
1891	1417560_at	733.9	746.3	553.8	1049.1	988.9	1069.9	1.52797	0.61162	0.00584369	sideroflexin 1	Sfxn1
42440	1458145_at	73.1	67.9	69.4	127.7	99.6	93.9	1.52662	0.610337	0.0249586	RAR-related orphan receptor alpha	Rora
30999	1446693_at	31	41.8	38.5	68.6	52.4	48.9	1.5265	0.610232	0.0464762
29075	1444769_at	18.7	18	27.4	30.3	36.1	31.4	1.52574	0.60951	0.0328252	testis expressed gene 9	Tex9
35339	1451044_at	49.2	45.9	42.3	63.8	59.3	86.5	1.52547	0.609257	0.0497047	gem (nuclear organelle) associated protein 2	Gemin2
44758	1460466_at	136.5	95.5	91.9	153	190.7	149.9	1.52393	0.607794	0.0434642	RIKEN cDNA 1700047I17 gene 2 /// family with sequence similarity 177, member A /// uncharacterized LOC100503822	1700047I17Rik2
7720	1423414_at	72.3	46.9	62.1	103.1	87.3	85.6	1.52234	0.606289	0.0269322	prostaglandin-endoperoxide synthase 1	Ptgs1
29706	1445400_at	27.8	27.3	24.2	35.2	43.7	41.5	1.51828	0.602443	0.00793268
11716	1427410_at	124.1	122.6	109.3	193.6	173.1	173.4	1.51713	0.601349	0.00174823	deleted in lymphocytic leukemia, 2	Dleu2
40575	1456280_at	143	134.4	141.1	235.1	231.5	167.5	1.51517	0.599483	0.0313735	claspin	Clspn
28688	1444382_at	12	15.3	14.5	21.7	23.8	17.8	1.51435	0.598703	0.0238201	nuclear protein transcriptional regulator 1 like	Nupr1l
23174	1438868_at	41	38.1	32.1	50.7	59	58.6	1.51349	0.597878	0.00720036	PHD finger protein 11D	Phf11d
31683	1447377_at	27.5	22	24.4	36.9	36.1	38.8	1.51286	0.597274	0.00209026	predicted gene 11236 /// predicted gene 11237 /// predicted gene 428 /// uncharacterized LOC100502896 /// uncharacterized LOC100862015 /// uncharacterized LOC101055863	Gm11236
20454	1436148_at	160	151	166.8	214.3	224.5	283.4	1.51151	0.595992	0.0208303
37983	1453688_at	25.3	29.3	37.9	46.6	46.3	46.8	1.51027	0.594807	0.0133774	CWF19-like 2, cell cycle control (S. pombe)	Cwf19l2
30521	1446215_at	29.6	28	25	42.7	40.9	41.1	1.50969	0.594248	0.000661273	zinc finger homeobox 2, opposite strand	Zfhx2os
1005	1416674_at	40.2	39.4	54.6	66.3	71.2	65	1.50894	0.593537	0.0125858	protein tyrosine phosphatase, receptor type, U	Ptpru
24773	1440467_at	21.5	23.2	17	30.9	35.3	26.6	1.50405	0.588854	0.0292802	centrosomal protein 162	Cep162
8971	1424665_at	117.3	100.2	117.2	155.1	189.1	158.7	1.50254	0.587403	0.0100342	G patch domain containing 8	Gpatch8
29977	1445671_at	29.9	22.6	33.6	41	38.7	49.6	1.50174	0.586637	0.0358912
13475	1429169_at	43.9	58.5	60.6	77.8	82.8	83.9	1.5	0.584963	0.00821329	predicted gene 15453 /// RNA binding motif protein 3	Gm15453
43760	1459465_at	11.8	7.7	10.8	12.9	16.3	16.2	1.49835	0.583375	0.0390238
26471	1442165_at	41.2	65.2	43.2	79.1	71.6	73.2	1.49666	0.581744	0.0366344	armadillo repeat containing 9	Armc9
31802	1447496_s_at	50.8	62.5	61.7	80	86	95.7	1.49543	0.580559	0.00819771	fibronectin type 3 and ankyrin repeat domains 1	Fank1
21617	1437311_at	553.3	454.1	507	823.3	658.5	780.4	1.49379	0.57898	0.0119949	small nucleolar RNA host gene 11	Snhg11
11227	1426921_at	79.8	93.7	108	131.6	159.1	129.5	1.49272	0.577941	0.0210673	ATP-binding cassette, sub-family F (GCN20), member 1	Abcf1
1521	1417190_at	108	123.5	128.3	199.9	178.6	158.5	1.4925	0.577727	0.0117113	nicotinamide phosphoribosyltransferase	Nampt
39823	1455528_at	52.2	48.8	39.2	62.1	71.3	75.2	1.48787	0.573253	0.0142988
6149	1421843_at	50.7	52.4	67.6	77.4	101.4	75.1	1.4874	0.572797	0.0498637	interleukin 1 receptor accessory protein	Il1rap
38078	1453783_at	47.4	41.3	52.5	72.3	60.6	75.7	1.47734	0.562999	0.0160015	purine rich element binding protein A	Pura
23839	1439533_at	3.3	3.4	3.6	5.7	4.3	5.2	1.47573	0.561427	0.0175677	family with sequence similarity 229, member A	Fam229a
10920	1426614_at	444.4	463.8	390.2	613.5	625.1	674.9	1.47374	0.559479	0.00210583	zinc finger, MYND-type containing 8	Zmynd8
14795	1430489_at	9.6	10.6	15.9	17.5	18.7	17	1.47368	0.559427	0.0476604	RIKEN cDNA 5430416G10 gene	5430416G10Rik
31789	1447483_s_at	29.3	27.1	24	35.3	42.4	40.7	1.47264	0.558402	0.00860623
25095	1440789_at	37	41.9	50.9	63.1	71.3	56.7	1.47227	0.558037	0.0252879	neogenin	Neo1
28771	1444465_at	21.7	21.2	17.9	32.7	28.5	28.2	1.47039	0.556204	0.00711406	ubiquitination factor E4B	Ube4b
11257	1426951_at	156.6	114.6	158.6	189.2	195.5	247.2	1.47022	0.556031	0.0445626	cysteine rich transmembrane BMP regulator 1 (chordin like)	Crim1
18891	1434585_at	84.4	75.8	73.7	106.7	115.3	121.8	1.46986	0.555678	0.00257276	predicted gene 2808 /// tubby like protein 4	Gm2808
10672	1426366_at	185.3	246.3	215.5	372.3	276.9	301.8	1.46963	0.555457	0.0392225	argonaute RISC catalytic subunit 2	Ago2
26812	1442506_at	25.2	31.3	25.3	43.1	33.9	43.2	1.46944	0.555264	0.0254904
33760	1449460_at	94.5	85.7	68.8	119.4	106.2	140	1.46827	0.55412	0.0349767	ankyrin repeat and SOCS box-containing 13	Asb13
22419	1438113_at	19.9	16.9	26.9	32.3	31	30.2	1.46782	0.553673	0.0304017	zinc finger, matrin type 4	Zmat4
30762	1446456_at	31.6	32.7	47.9	58.7	48.9	57	1.46702	0.552892	0.0450529
6833	1422527_at	69.7	87.1	73.1	112.3	96.4	128.5	1.46672	0.552598	0.028659	histocompatibility 2, class II, locus DMa	H2-DMa
35062	1450767_at	25	32.3	32.4	46.6	41.4	43.4	1.46488	0.550785	0.00848758	neural precursor cell expressed, developmentally down-regulated gene 9	Nedd9
45001	1460709_a_at	267.6	240.1	266.5	363.1	342.5	427.7	1.46383	0.549752	0.0116753	abhydrolase domain containing 16A	Abhd16a
36226	1451931_x_at	93.4	112.2	93.9	145.9	143.1	149.2	1.46311	0.549033	0.00198377	histocompatibility 2, K1, K region	H2-K1
43219	1458924_at	20.1	15.9	13.4	22.7	22	27.3	1.45749	0.543486	0.0425666	RIKEN cDNA D430013B06 gene	D430013B06Rik
39131	1454836_at	199.3	207.9	199.6	274.3	290.3	319.3	1.45666	0.542662	0.00236656	transmembrane protein 18	Tmem18
1890	1417559_at	522.5	523.7	487	678.7	801.9	750.3	1.45506	0.54108	0.00350433	sideroflexin 1	Sfxn1
30902	1446596_at	72.6	76.9	60.3	110.2	82.9	112.1	1.45472	0.54074	0.0406557
39430	1455135_at	108	126.2	165.6	191.5	207	182.6	1.45348	0.539508	0.0305443	proline rich 24	Prr24
17372	1433066_at	53	49.3	72.6	90.1	79.2	84.7	1.45226	0.538298	0.028725	RIKEN cDNA 6330510M09 gene	6330510M09Rik
41946	1457651_x_at	231	178.7	192.3	268.2	336.9	268.4	1.451	0.537044	0.0309364	rad and gem related GTP binding protein 2	Rem2
20693	1436387_at	1078.8	789.9	705.8	1333.5	1266.3	1134.7	1.45057	0.536623	0.0383661	RIKEN cDNA C330006P03 gene /// homer homolog 1 (Drosophila)	Homer1
25356	1441050_at	99.8	88.9	92.8	135	150.2	122.7	1.44902	0.535081	0.00794569
10890	1426584_a_at	102.4	129	83	145.8	158	151.7	1.44879	0.53485	0.0270142	sorbitol dehydrogenase	Sord
7249	1422943_a_at	160.4	150.6	123.6	192.3	239.4	197.3	1.44731	0.533372	0.0250567	heat shock protein 1	Hspb1
28969	1444663_at	25.2	30.2	33.4	50.8	40.8	36.9	1.44707	0.533137	0.0503449	uncharacterized LOC102641103	LOC102641103
15779	1431473_at	138.9	112.9	88.6	156.3	155.8	180.2	1.44624	0.532307	0.0380587	RIKEN cDNA 5330423I11 gene	5330423I11Rik
9056	1424750_at	59.4	45.6	39.8	69.6	65.7	74	1.44544	0.531511	0.0267995	zinc finger and BTB domain containing 1	Zbtb1
26871	1442565_at	41.7	45.5	44.7	61.3	64.5	64.4	1.442	0.528073	0.000240243	protocadherin 10	Pcdh10
13885	1429579_at	224.5	232.2	244.9	314.9	349.6	347	1.4417	0.527776	0.00122237	guanylate cyclase 1, soluble, alpha 2	Gucy1a2
33616	1449316_at	92.6	69.7	86	117.9	126.2	113.8	1.4414	0.527472	0.00909383	cytochrome P450, family 4, subfamily f, polypeptide 15	Cyp4f15
2361	1418030_at	77	61.7	81.6	89.3	106.6	121.5	1.44076	0.526833	0.0431813	solute carrier organic anion transporter family, member 3a1	Slco3a1
16680	1432374_a_at	54.2	55.4	61.2	80.1	78	87.7	1.43911	0.525177	0.00238805	ethanolaminephosphotransferase 1 (CDP-ethanolamine-specific)	Ept1
7834	1423528_at	35.4	57.8	57.6	75.9	69	71.9	1.43767	0.523728	0.0460273	breast carcinoma amplified sequence 3	Bcas3
11006	1426700_a_at	80.6	115.4	88.6	145.2	138.5	125.2	1.43675	0.522812	0.0263535	PAN2 polyA specific ribonuclease subunit homolog (S. cerevisiae)	Pan2
22404	1438098_at	35	29.3	22	41.1	43.1	39.7	1.43569	0.521744	0.0322071	discs, large (Drosophila) homolog-associated protein 1	Dlgap1
27350	1443044_at	50.3	52.3	40.9	61.6	73.3	71	1.43484	0.520893	0.0142969	uncharacterized A830091E24	A830091E24
43259	1458964_at	24.2	22.1	26.4	32.1	31.6	40.6	1.43466	0.520712	0.0293918
12506	1428200_a_at	58.6	45.8	58.1	77.6	73.8	81.7	1.43446	0.520509	0.00783522	pyridoxal-dependent decarboxylase domain containing 1	Pdxdc1
30175	1445869_at	32.3	34.6	28.6	45.7	42	49.1	1.43246	0.518496	0.00693382
41694	1457399_at	29.6	37.2	39.8	48.5	44.9	59.3	1.43246	0.518493	0.0441331
18148	1433842_at	47.2	41.5	57.3	72.9	59.7	76.4	1.43151	0.517535	0.0377759	leucine rich repeat (in FLII) interacting protein 1	Lrrfip1
9093	1424787_a_at	44.7	37	44.7	65.8	56.8	58.2	1.43038	0.516398	0.00879077	nuclear respiratory factor 1	Nrf1
21553	1437247_at	152.3	143.5	151.8	216	229	194.6	1.42895	0.51496	0.00357136	fos-like antigen 2	Fosl2
13112	1428806_at	251.4	264	222.5	353.2	358.3	342.8	1.42878	0.514788	0.00129366	casein kinase 1, gamma 1	Csnk1g1
2527	1418196_at	31.1	45.4	44.4	53.5	62.1	57.1	1.42845	0.514454	0.0300753	telomerase associated protein 1	Tep1
13641	1429335_at	183.7	169.9	154.4	229.1	251.4	244.9	1.42795	0.513948	0.00251984	small nuclear RNA activating complex, polypeptide 1	Snapc1
42183	1457888_at	30	24.3	36.3	41.6	40.6	47.1	1.42715	0.513139	0.0324147
13970	1429664_at	32.4	24.8	34	41.9	46.5	41.7	1.42654	0.512515	0.016137	cyclin-dependent kinase-like 1 (CDC2-related kinase)	Cdkl1
22331	1438025_at	86.2	84.8	76.7	127.3	110.3	114	1.41946	0.505341	0.0043398	mitochondrial translational release factor 1-like	Mtrf1l
2294	1417963_at	295.2	249.6	253.1	355.3	360.3	416.2	1.41847	0.504339	0.0103375	phospholipid transfer protein	Pltp
35406	1451111_at	51.1	53.6	47.3	85.6	63.6	66.4	1.41842	0.504286	0.0413906	nucleoporin 133	Nup133
19464	1435158_at	59.8	71.1	94.8	115.7	102.9	101.5	1.41825	0.504116	0.0490725	RNA binding motif protein 12 B1	Rbm12b1
25242	1440936_at	129.6	123.5	148.2	158.1	192.5	218.4	1.41789	0.503747	0.0421623	serine active site containing 1	Serac1
10150	1425844_a_at	87.6	90.3	90.1	144	130.5	105.4	1.41754	0.503387	0.0302588	RNA guanylyltransferase and 5'-phosphatase	Rngtt
13728	1429422_at	44.6	35.2	41	63.3	54.1	53.8	1.41722	0.503062	0.0154934	RIKEN cDNA 4933412E12 gene	4933412E12Rik
26842	1442536_at	65.4	52.4	51.7	89.6	76.9	73.7	1.41711	0.502951	0.0232392	RIKEN cDNA 6430590A07 gene	6430590A07Rik
36906	1452611_at	59.3	56.6	55.7	71.2	92.8	79	1.41608	0.501907	0.0205699	listerin E3 ubiquitin protein ligase 1	Ltn1
28030	1443724_at	138	164.9	120.9	209.1	175.1	215.5	1.41505	0.500857	0.0307398	junctophilin 3	Jph3
7468	1423162_s_at	271.1	241.3	225.3	372.1	354.6	316.2	1.41372	0.499495	0.00876389	sprouty protein with EVH-1 domain 1, related sequence	Spred1
8101	1423795_at	612.8	475.3	490.1	769.3	743.1	716.9	1.41256	0.498311	0.00927337	splicing factor proline/glutamine rich (polypyrimidine tract binding protein associated)	Sfpq
39338	1455043_at	25.8	32.8	34.5	42.3	43.1	46	1.41139	0.497112	0.0115306	transportin 1	Tnpo1
19556	1435250_at	161.8	144.8	147.8	211.3	232.5	197.5	1.41131	0.497037	0.00553511	integrator complex subunit 8	Ints8
30482	1446176_at	48.5	36.9	45.2	68.3	51.6	64.4	1.41118	0.496901	0.042858
36723	1452428_a_at	565.3	465.5	554.7	695.3	686.7	853.8	1.41015	0.495853	0.0261057	beta-2 microglobulin	B2m
20417	1436111_at	52.9	41.6	63.2	75.5	81.1	65.7	1.40964	0.495325	0.0488324	transmembrane protein 212	Tmem212
35159	1450864_at	504.6	469.6	473.4	664.7	691.8	681.9	1.40812	0.493774	0.000133164	calmodulin 1 /// calmodulin 2 /// calmodulin 3	Calm1
12372	1428066_at	44.6	40.2	41.5	52.2	56.6	69	1.40776	0.493401	0.029831	coiled-coil domain containing 120	Ccdc120
33856	1449556_at	70	86.2	57.5	101.4	108.6	90.2	1.40477	0.490337	0.0433564	RIKEN cDNA C920025E04 gene /// histocompatibility 2, T region locus 23 /// h-2 class I histocompatibility antigen, D-37 alpha chain-like	C920025E04Rik
1641	1417310_at	56.8	50.4	37.9	63.5	66.8	73.5	1.40455	0.490107	0.0356976	transducer of ERBB2, 2	Tob2
15348	1431042_at	142.6	99.3	95.4	153.5	157.2	162.7	1.4035	0.489027	0.0418181	progestin and adipoQ receptor family member VIII	Paqr8
7466	1423160_at	778.2	570.9	628.7	863.9	1008.9	896.5	1.40019	0.485625	0.0253232	sprouty protein with EVH-1 domain 1, related sequence	Spred1
32432	1448132_at	55.6	47.2	40	76	59.5	64.4	1.39986	0.485282	0.0458775	solute carrier family 19 (folate transporter), member 1	Slc19a1
18726	1434420_x_at	221.9	142.8	194.2	241.7	263.2	277.2	1.39936	0.484763	0.0426982	translocase of outer mitochondrial membrane 22 homolog (yeast)	Tomm22
8476	1424170_at	249.2	240.6	211.2	337.9	308.9	334.1	1.39929	0.484692	0.00313151	PHD finger protein 5A	Phf5a
14570	1430264_at	85.4	87.3	85.3	122.9	116.7	121.3	1.39884	0.484228	6.37399e-05	RIKEN cDNA 2610030P05 gene	2610030P05Rik
38846	1454551_at	39.3	37.6	33.8	48.1	53.5	53.2	1.39837	0.48375	0.00354602	RIKEN cDNA 9530034D02 gene	9530034D02Rik
34425	1450130_at	214.5	213.8	215.1	297.3	327	275.4	1.39835	0.483728	0.00464628	xenotropic and polytropic retrovirus receptor 1	Xpr1
36136	1451841_a_at	59.9	59.8	60.8	84.8	75.5	92	1.39778	0.483141	0.00748982	nuclear receptor co-repressor 2	Ncor2
40225	1455930_at	47.6	48.2	55	64.2	73.7	72.8	1.39721	0.482554	0.00655977
41857	1457562_at	54.3	43.9	46.4	65.4	65.9	70.7	1.39696	0.482288	0.00579318	ribosomal protein S6 kinase, polypeptide 1	Rps6kb1
6261	1421955_a_at	760.1	822.9	760.8	1202.2	1092.3	979	1.39666	0.481985	0.0102098	neural precursor cell expressed, developmentally down-regulated 4	Nedd4
40014	1455719_at	120.2	164	186.8	222	228.2	207.4	1.39618	0.481483	0.0385744	tubulin, beta 5 class I	Tubb5
10275	1425969_a_at	103.7	87	75.5	132	113.4	125.8	1.39444	0.479686	0.0236878	huntingtin	Htt
13811	1429505_at	152.4	156.2	189.9	218.3	227.9	248.1	1.39278	0.477966	0.011611	neurobeachin like 1	Nbeal1
20085	1435779_at	34.4	40.7	43.7	60.8	48.9	55.7	1.39226	0.477424	0.0242859	centriolin	Cntrl
28447	1444141_at	61.5	63.1	63.3	85.2	91.3	84.9	1.39117	0.476294	0.000345404	sorting nexin 13	Snx13
11571	1427265_at	47.4	68	56.4	71.6	86.3	81.1	1.39115	0.476281	0.0381692	breakpoint cluster region	Bcr
28475	1444169_at	45.4	55.1	44.9	66	67.5	68.7	1.39065	0.475756	0.00515149	RIKEN cDNA 3110052M02 gene	3110052M02Rik
7920	1423614_at	71	47.8	62.1	85.2	74.6	91.6	1.38972	0.474792	0.0486105	leucine rich repeat containing 8 family, member C	Lrrc8c
44354	1460061_at	95.9	112.7	110.8	139.2	143.1	161.5	1.38948	0.474545	0.00882442
35753	1451458_at	58.6	41.8	53.7	68.1	65.3	80.6	1.38871	0.473744	0.0435747	transmembrane protein 2	Tmem2
25434	1441128_at	46.2	43.7	48.3	71.3	60.2	60.4	1.38857	0.473597	0.0101152	RIKEN cDNA 2900016J10 gene	2900016J10Rik
28417	1444111_at	38.5	42	30.9	49.3	46.6	58.6	1.38689	0.471858	0.0425591
21292	1436986_at	40.8	42.8	46.3	67.1	62.4	50.6	1.38645	0.471397	0.0316702	syntrophin, basic 2	Sntb2
27523	1443217_at	16	18.5	21.7	27.9	24.1	25.9	1.38612	0.471053	0.0217561	uncharacterized LOC102640749	LOC102640749
26577	1442271_at	45.6	62.4	43.5	74.4	69.8	65.6	1.38482	0.469697	0.040317	cytoskeleton associated protein 5	Ckap5
1703	1417372_a_at	532.8	528.3	529.7	741.1	759.5	700.7	1.38377	0.468603	0.000306772	pellino 1	Peli1
20168	1435862_at	620.8	608.2	751.5	853.6	931.5	952.3	1.38218	0.466942	0.00998911	Son DNA binding protein	Son
35240	1450945_at	76.8	66.9	77.4	91.4	105.9	108.2	1.38173	0.466473	0.0108984	protein kinase C, alpha	Prkca
18516	1434210_s_at	63.5	65.4	79.4	105.6	90.1	92.1	1.38166	0.466404	0.01923	leucine-rich repeats and immunoglobulin-like domains 1	Lrig1
3756	1419425_at	113.6	111.7	91.9	159.5	154.2	124.1	1.3802	0.464879	0.0367051	cannabinoid receptor 1 (brain)	Cnr1
4689	1420383_a_at	53.7	42.9	57.1	62.4	80.5	68.9	1.37801	0.462585	0.046644	collagen, type IV, alpha 3 (Goodpasture antigen) binding protein	Col4a3bp
38925	1454630_at	57.7	83.9	75.1	93.8	96.3	108.2	1.37656	0.461065	0.0376442	sterile alpha motif domain containing 14	Samd14
12358	1428052_a_at	180.8	202.6	188.9	234.9	287.6	265.1	1.3762	0.460692	0.0122621	zinc finger, MYM domain containing 1	Zmym1
22148	1437842_at	179.3	177	150.6	257.2	221.5	217.3	1.37305	0.457386	0.0157725	phosphatidylinositol-specific phospholipase C, X domain containing 1	Plcxd1
19164	1434858_x_at	48.1	54.8	55.9	73.2	66.2	78.6	1.3728	0.457117	0.0104329	zinc finger protein 511	Zfp511
12529	1428223_at	183.4	163.1	147.2	212.7	237.9	226.1	1.37067	0.454882	0.00876386	major facilitator superfamily domain containing 2A	Mfsd2a
21487	1437181_at	154.3	168.3	181.9	246.3	225.8	218.9	1.36967	0.453831	0.00558845	pellino 2	Peli2
41561	1457266_at	154.7	196.2	159.1	246	217.6	234.2	1.36824	0.452316	0.0157104	solute carrier family 38, member 6	Slc38a6
234	1415903_at	350.3	266.4	256.3	408.9	388.8	396.2	1.36758	0.451628	0.0243922	solute carrier family 38, member 1	Slc38a1
43315	1459020_at	41.4	42.3	33.4	51.1	56.8	52.1	1.36635	0.450331	0.0127028	adhesion molecule with Ig like domain 1	Amigo1
27401	1443095_at	28.1	29.2	35.7	41.5	44.4	40.9	1.36344	0.447252	0.0124141
2653	1418322_at	64.3	71.4	55.3	98.4	82.8	79.1	1.36283	0.446603	0.0373506	cAMP responsive element modulator	Crem
22477	1438171_x_at	1061.7	1040	1150.2	1483.7	1542.9	1402.7	1.36207	0.445796	0.00174827	methyltransferase like 9	Mettl9
34720	1450425_a_at	142.3	125.1	149.1	182.5	196	188	1.36014	0.443759	0.00357237	RIKEN cDNA 2700062C07 gene /// predicted gene 9182	2700062C07Rik
18424	1434118_at	63.4	74	55.1	88.8	96.9	75.8	1.35844	0.441953	0.0490261	mitochondrial ubiquitin ligase activator of NFKB 1	Mul1
19859	1435553_at	315.3	393.4	351.3	435.6	505.8	497.2	1.35717	0.440601	0.016201	PDZ domain containing 2	Pdzd2
22497	1438191_a_at	108.6	106.6	110.1	165.9	136.4	138.7	1.35567	0.439008	0.0155015	ring finger protein 40	Rnf40
5175	1420869_at	56.5	74.5	74	86.9	96.2	94.6	1.35463	0.437903	0.0211287	myeloid/lymphoid or mixed-lineage leukemia (trithorax homolog, Drosophila); translocated to, 10	Mllt10
22229	1437923_at	237.6	213.9	287.7	341.2	320.3	339.7	1.35444	0.437694	0.0185348	expressed sequence AI314760 /// casein kinase 1, alpha 1	AI314760
25493	1441187_at	77.3	83.1	93.6	117.1	124.5	102.4	1.35433	0.43758	0.020423	RIKEN cDNA E330037M01 gene	E330037M01Rik
13216	1428910_at	371.7	322.1	345.3	488.4	417	501.7	1.35415	0.43739	0.0149025	RIKEN cDNA 2310022B05 gene	2310022B05Rik
8574	1424268_at	200.2	197.7	197.9	237	258.4	311.2	1.35381	0.437025	0.0333871	spermine oxidase	Smox
19845	1435539_at	141.6	173.9	173.5	214.6	235	212.4	1.35378	0.436997	0.011056	huntingtin	Htt
18711	1434405_at	206.9	224	252.7	336.8	328.1	259.4	1.35211	0.435209	0.0451525	folliculin interacting protein 1	Fnip1
40767	1456472_at	15.7	17.4	17.8	20.2	23.5	25.1	1.35167	0.434743	0.0194861	armadillo repeat containing 4	Armc4
5630	1421324_a_at	130.6	127.5	129.9	149.3	197.6	177.5	1.35155	0.434611	0.0317204	thymoma viral proto-oncogene 2	Akt2
22433	1438127_at	52.4	63.9	64.1	75.1	76.5	92.1	1.35089	0.433907	0.0342465	uncharacterized LOC552906	LOC552906
37712	1453417_at	22.2	32.3	31.2	37.6	37.7	40.4	1.35006	0.433022	0.039753	RIKEN cDNA 4933407K13 gene	4933407K13Rik
1832	1417501_at	122.6	155.1	141.5	186.3	185.7	193.6	1.34924	0.432143	0.00748922	F-box protein 6	Fbxo6
37120	1452825_at	667.8	744.7	625.8	926.6	908.5	914.2	1.34882	0.431698	0.00254072	transmembrane protein 59-like	Tmem59l
22147	1437841_x_at	220	246.2	242.7	330.4	289.6	336.1	1.34871	0.431579	0.0079972	cold shock domain containing C2, RNA binding	Csdc2
6816	1422510_at	193.5	162.3	190.4	260.1	234.7	241.7	1.34841	0.431256	0.00707528	CTD (carboxy-terminal domain, RNA polymerase II, polypeptide A) small phosphatase-like	Ctdspl
8570	1424264_at	82.1	75.2	90.8	125.3	95.7	113.5	1.34825	0.431084	0.0413711	mediator complex subunit 6	Med6
1557	1417226_at	180.6	176.1	147.1	217.1	211.5	250.5	1.34796	0.430773	0.0220621	F-box and WD-40 domain protein 4	Fbxw4
10601	1426295_at	40.9	38.6	34.9	47.4	49.5	57.3	1.3479	0.430716	0.0189393	hyaluronan and proteoglycan link protein 1	Hapln1
11613	1427307_a_at	142.6	130.4	154.6	173.3	220.2	182.8	1.34775	0.430558	0.0358109	disabled 1	Dab1
11177	1426871_at	375.3	409.7	418.9	522.6	578.9	518.4	1.34554	0.428189	0.00418491	F-box protein 33	Fbxo33
23732	1439426_x_at	27.4	26.6	29.3	33.2	42.3	36.5	1.34454	0.42711	0.0261951	lysozyme 1	Lyz1
22073	1437767_s_at	161.2	133.1	139.6	195.7	212	174.9	1.34271	0.425143	0.0223408	thymoma viral proto-oncogene 1 interacting protein	Aktip
13282	1428976_at	30.7	34.7	31.3	46.3	39.2	44.3	1.3423	0.424703	0.0108452	thymopoietin	Tmpo
30433	1446127_at	100.8	92	95.6	113.7	144.1	129.1	1.34154	0.42389	0.0229166	zinc finger E-box binding homeobox 1	Zeb1
25331	1441025_at	8.8	10.9	9	12.7	14.1	11.7	1.34146	0.423808	0.0276999	predicted gene 9954	Gm9954
13723	1429417_at	38.4	34.9	39.5	49.5	47.3	54.5	1.34131	0.423645	0.00723732	chondroitin sulfate synthase 3	Chsy3
10143	1425837_a_at	694.7	665.3	582.1	856.3	882.6	865.2	1.34087	0.423167	0.00309822	CCR4 carbon catabolite repression 4-like (S. cerevisiae)	Ccrn4l
43960	1459665_s_at	44.6	34.3	41.8	55.8	57.1	48.7	1.33886	0.421002	0.0277842	MRV integration site 1	Mrvi1
34754	1450459_at	95.2	92.4	112.1	150.4	122.2	128.2	1.33734	0.419363	0.0331345	signal peptide peptidase like 2A	Sppl2a
40053	1455758_at	417	343.2	350.4	465.3	480.4	538.9	1.33675	0.418735	0.0185061	protein kinase C, gamma	Prkcg
42965	1458670_at	60.4	54	77	90	86	79.8	1.33647	0.418425	0.0452715	adenosine deaminase, RNA-specific, B2	Adarb2
19061	1434755_at	396.9	395.1	365.2	553.6	484.4	508.3	1.33624	0.418182	0.0046766	coronin, actin binding protein, 2B	Coro2b
12796	1428490_at	72.5	71.8	76.8	81.9	103.2	110.2	1.33559	0.417482	0.0459971	core 1 synthase, glycoprotein-N-acetylgalactosamine 3-beta-galactosyltransferase, 1	C1galt1
10625	1426319_at	14.9	14.7	11.6	18.3	19	17.7	1.33495	0.416787	0.0153192	platelet-derived growth factor, D polypeptide	Pdgfd
11946	1427640_a_at	141.2	153.6	180.2	206.9	213.5	213.5	1.33453	0.416328	0.0106413	runt-related transcription factor 1; translocated to, 1 (cyclin D-related)	Runx1t1
3978	1419647_a_at	103.2	75.8	91.6	133.3	115.1	112.7	1.33444	0.416237	0.042429	immediate early response 3	Ier3
31857	1447551_x_at	292.8	268.4	309	363.9	416.5	380	1.33349	0.415203	0.00774189
19685	1435379_at	90	94.6	102.8	138.1	130.4	114.5	1.33264	0.414284	0.0156363	URB2 ribosome biogenesis 2 homolog (S. cerevisiae)	Urb2
43037	1458742_at	127.3	124.8	155.6	200.5	180.3	162.3	1.33211	0.41371	0.0381074	latrophilin 3	Lphn3
10524	1426218_at	230	217.9	243	332.5	301	286.2	1.33116	0.412686	0.00784925	glucocorticoid induced transcript 1	Glcci1
20666	1436360_at	75.2	108.6	104.5	130.1	128.4	124.6	1.32882	0.41015	0.0411672	zinc finger and SCAN domain containing 22	Zscan22
8102	1423796_at	267	220.4	199.2	295.9	289.3	326.8	1.32828	0.409564	0.0313885	splicing factor proline/glutamine rich (polypyrimidine tract binding protein associated)	Sfpq
36234	1451939_a_at	20.9	22.3	20.5	27.2	29.7	27.7	1.3281	0.409364	0.00175913	sushi-repeat-containing protein	Srpx
4130	1419799_at	13.8	17.5	20	23	23	22.1	1.32749	0.408696	0.0373932	ribosomal protein L27A	Rpl27a
8614	1424308_at	492.3	385.7	512.8	591.6	599.1	653	1.32564	0.406689	0.0262968	solute carrier family 24 (sodium/potassium/calcium exchanger), member 3	Slc24a3
16992	1432686_at	38.3	37.4	46.3	60	49.5	52.2	1.32541	0.406439	0.0352921	RIKEN cDNA 4833406M21 gene	4833406M21Rik
5603	1421297_a_at	113.2	122.7	114.1	153.9	144.6	165	1.32429	0.405214	0.00465905	calcium channel, voltage-dependent, L type, alpha 1C subunit	Cacna1c
396	1416065_a_at	480.1	441.9	453.8	587.1	595.4	637.5	1.32287	0.403668	0.00153852	ankyrin repeat domain 10	Ankrd10
20202	1435896_at	67.7	62.9	77.7	101.8	93.7	80	1.32261	0.403389	0.0439208	sideroflexin 2	Sfxn2
22987	1438681_at	54.4	52	60	72.1	70.2	77.7	1.32212	0.402848	0.00544974	alkB, alkylation repair homolog 1 (E. coli)	Alkbh1
23423	1439117_at	180.5	148.8	147.9	181.9	218.9	229.6	1.32104	0.401673	0.0469534	calmin	Clmn
32719	1448419_at	121.4	148.3	160.8	179.2	187.1	202	1.32009	0.400639	0.0266446	processing of precursor 4, ribonuclease P/MRP family, (S. cerevisiae)	Pop4
3422	1419091_a_at	92.6	91.8	85.9	128.7	125.2	102.8	1.31964	0.40015	0.0264088	annexin A2	Anxa2
43969	1459674_at	238.1	190.3	220.5	274.6	307.4	273.9	1.319	0.399446	0.0179067
12869	1428563_at	88.8	92.6	95.7	128.3	117.5	119.5	1.3183	0.398675	0.00161253	DEAD (Asp-Glu-Ala-Asp) box polypeptide 10	Ddx10
2642	1418311_at	120.7	149.4	170.5	189.8	203.3	187.7	1.3182	0.398572	0.0373983	fructosamine 3 kinase	Fn3k
35081	1450786_x_at	59.3	47.6	59.1	72.5	77.5	68.8	1.31807	0.398429	0.0188963	PDZ and LIM domain 5	Pdlim5
18551	1434245_a_at	87.4	70	73.9	91.5	100.3	112.8	1.3169	0.397151	0.0396267	cytochrome b561 family, member A3	Cyb561a3
9916	1425610_s_at	82.7	75	61.2	92.5	92.9	102.8	1.31658	0.396798	0.0317415	UDP-N-acetyl-alpha-D-galactosamine:polypeptide N-acetylgalactosaminyltransferase 2	Galnt2
15528	1431222_at	40.1	37.1	34.5	47.3	51.2	48.5	1.31603	0.396187	0.00407277	T cell lymphoma invasion and metastasis 2	Tiam2
7377	1423071_x_at	128.4	136.2	138.2	187.1	180	162.9	1.31579	0.395929	0.0055054	RIKEN cDNA 6720475J19 gene	6720475J19Rik
39181	1454886_x_at	926.9	774.9	730.8	1162.2	1010.3	1025.3	1.31456	0.394581	0.0290789	tripartite motif-containing 9	Trim9
36824	1452529_a_at	39.8	35.7	36.4	50.4	46.6	50	1.31367	0.393606	0.0025934	cAMP responsive element binding protein 1	Creb1
18612	1434306_at	244.3	258.9	211.5	332.5	310.3	296	1.31356	0.39348	0.0131764	RAB3A interacting protein	Rab3ip
28118	1443812_x_at	12	13.6	11.4	16.9	17.2	14.5	1.31351	0.393431	0.0229948
38331	1454036_a_at	225.5	204.4	189.7	275.1	278.9	259.7	1.31327	0.39316	0.00560996	ubiquitin specific peptidase 15	Usp15
174	1415843_at	49.2	44.7	35.2	55.4	53.3	60.8	1.31294	0.392796	0.0454712	MTOR associated protein, LST8 homolog (S. cerevisiae)	Mlst8
19564	1435258_at	49.1	44	46.6	58.8	54.1	70.3	1.31138	0.391087	0.0449457	transmembrane protein 141	Tmem141
75	1415744_at	639.2	550.7	569.4	743.6	737	824.2	1.31007	0.38964	0.00946306	prefoldin subunit 6	Pfdn6
37599	1453304_s_at	367.4	371.1	361.1	512.4	434.8	493.1	1.30984	0.389391	0.00845414	lymphocyte antigen 6 complex, locus E	Ly6e
21710	1437404_at	70.3	79.5	77.7	99.3	104.3	94.2	1.30901	0.388477	0.00444486	microtubule associated serine/threonine kinase family member 4	Mast4
18526	1434220_at	164.8	162	164.2	221.3	188	233.3	1.30876	0.388198	0.0204391	nucleoporin 98	Nup98
20184	1435878_at	118.4	152.7	119.2	166.5	186	158.3	1.30874	0.388175	0.0452542	serine/threonine kinase 38 like	Stk38l
19048	1434742_s_at	293.9	281	282.1	362.3	344	414.6	1.30793	0.38729	0.0150804	apoptosis-inducing factor, mitochondrion-associated 3	Aifm3
12237	1427931_s_at	138.6	117.9	116.2	178.5	162.3	146.5	1.30749	0.386795	0.0310363	pyridoxal (pyridoxine, vitamin B6) kinase	Pdxk
27936	1443630_at	146.5	152.2	142.2	218.3	192.8	165	1.30665	0.385868	0.0451226
17905	1433599_at	65.9	81	71.2	95.8	105.2	83.8	1.30582	0.384959	0.0431772	bromodomain adjacent to zinc finger domain 1A	Baz1a
3269	1418938_at	46.3	47.4	41.9	50.1	63.7	63.1	1.30457	0.383577	0.0440399	deiodinase, iodothyronine, type II	Dio2
3904	1419573_a_at	96.9	98.2	95.8	124.2	114.7	140.6	1.30457	0.383577	0.0177231	lectin, galactose binding, soluble 1	Lgals1
41090	1456795_at	102.4	97.9	126.5	141.2	141.4	143.6	1.30416	0.383123	0.020514	BEN domain containing 4	Bend4
33842	1449542_at	88.7	67.4	80	104.5	98	105.3	1.30368	0.382595	0.0223442	pre B cell leukemia homeobox 1	Pbx1
18201	1433895_at	290	308.1	306.6	416.3	375.5	387	1.30297	0.381808	0.00245893	transmembrane protein 127	Tmem127
2680	1418349_at	113.6	100.4	112.4	133.9	161.2	130	1.30239	0.381161	0.0369261	heparin-binding EGF-like growth factor	Hbegf
15322	1431016_at	49	46	54	64.7	62.9	66.4	1.30201	0.380744	0.00413108	CWF19-like 1, cell cycle control (S. pombe)	Cwf19l1
23921	1439615_at	21.7	25.4	18.8	27.2	31.4	27.2	1.30197	0.380699	0.0487544	giant axonal neuropathy	Gan
14008	1429702_at	391	412.4	357.5	507.1	538.2	466.1	1.30192	0.380642	0.0112986	RIKEN cDNA 2900072G11 gene	2900072G11Rik
32183	1447877_x_at	62.4	48.8	57	71.4	73.8	73.7	1.30143	0.380094	0.0137738	DNA methyltransferase (cytosine-5) 1	Dnmt1
19673	1435367_at	335.9	278.3	362.7	468.9	390.3	411.8	1.30105	0.379681	0.0456508	mitogen-activated protein kinase 4	Mapk4
28346	1444040_at	32.3	29.9	34.3	46.1	43.1	36.3	1.30052	0.379087	0.0378992	leukocyte-associated Ig-like receptor 1	Lair1
43529	1459234_at	23.8	26.3	22.5	27.6	33.5	33.2	1.2989	0.377288	0.0310935	Mus musculus adult male bone cDNA, RIKEN full-length enriched library, clone:9830132M16 product:arachidonate 5-lipoxygenase activating protein, full insert sequence.	AK036547
3836	1419505_a_at	140.6	123.9	141.6	176.8	181.4	169.1	1.29845	0.376789	0.00395992	geranylgeranyl diphosphate synthase 1	Ggps1
18475	1434169_at	647.9	771.6	648.5	867.5	811.3	1004.6	1.29758	0.375826	0.0439128	kazrin, periplakin interacting protein	Kazn
39596	1455301_at	1448.2	1472.7	1213	1736.9	1623.5	2001.9	1.29715	0.375348	0.0424749	WAS/WASL interacting protein family, member 3	Wipf3
28601	1444295_at	29.5	33.3	34.2	39.3	41.8	44.7	1.29691	0.375075	0.01065	neogenin	Neo1
13345	1429039_s_at	196.1	183.8	151.2	248.7	234.2	205.2	1.29561	0.373635	0.0475456	DET1 and DDB1 associated 1	Dda1
29611	1445305_at	33.1	28.9	34	44.6	38.9	40.8	1.29479	0.37272	0.014778	solute carrier family 10 (sodium/bile acid cotransporter family), member 7	Slc10a7
7755	1423449_a_at	477	540.3	418.5	633.1	618.6	607.1	1.29461	0.372517	0.017241	actinin alpha 4	Actn4
42900	1458605_at	72.3	67	77.8	91.6	101.3	88.1	1.29433	0.37221	0.0133281
2259	1417928_at	101.6	94.7	100.5	128.9	135.8	118.9	1.29245	0.370112	0.005671	PDZ and LIM domain 4	Pdlim4
37722	1453427_at	40.2	30.3	36.4	45.3	47.2	45.4	1.28999	0.367361	0.0248012	casein kinase 2, alpha 1 polypeptide	Csnk2a1
6384	1422078_at	101.3	103.3	109	137.9	135.7	130.9	1.28986	0.367214	0.000611729	thymoma viral proto-oncogene 3	Akt3
834	1416503_at	583.3	637.6	514.5	732.2	728.3	777.1	1.28939	0.366684	0.0126204	latexin	Lxn
350	1416019_at	117.5	107.6	113	149.9	142.9	143.1	1.28926	0.366547	0.000889216	down-regulator of transcription 1	Dr1
18614	1434308_at	51.2	58.2	45.6	67.8	66.5	65.5	1.28903	0.366288	0.0157273	solute carrier family 43, member 2	Slc43a2
22438	1438132_at	76.6	99.6	87.6	111.4	108.7	119.8	1.28848	0.365666	0.0269844	predicted gene 5089	Gm5089
19948	1435642_at	423.5	338.6	329.5	467.8	455.3	483.1	1.2882	0.365357	0.0276937	proline rich 18	Prr18
22065	1437759_at	84.6	89.2	97	108.8	124.4	115.5	1.28767	0.364759	0.0109432	phosphofructokinase, platelet	Pfkp
29885	1445579_at	131.5	112.7	134.8	148.6	182.4	157	1.2876	0.364683	0.0415283
34988	1450693_at	557	600.7	650.4	699.2	764.7	862.8	1.28682	0.363811	0.0341027	regulator of G-protein signaling 17	Rgs17
42503	1458208_s_at	93.7	78.7	90.4	102.2	114.1	121.8	1.28653	0.363485	0.0262737	methylcrotonoyl-Coenzyme A carboxylase 1 (alpha)	Mccc1
23740	1439434_x_at	213.5	187.1	212.9	298.8	252.9	237.5	1.28639	0.363328	0.0451965	SH2 domain containing 5	Sh2d5
10392	1426086_a_at	70.4	68.6	76.7	94.8	95.6	87	1.28605	0.362942	0.00503666	fragile X mental retardation syndrome 1	Fmr1
19815	1435509_x_at	903.8	792.4	842.1	1166.3	1046	1049.4	1.28499	0.361762	0.00912302	CDK2 (cyclin-dependent kinase 2)-associated protein 1	Cdk2ap1
33324	1449024_a_at	471.8	456.8	464.2	646.2	614.6	528.3	1.28453	0.361246	0.0204539	hexosaminidase A	Hexa
32451	1448151_at	155.3	169.5	211.4	239.7	225.6	222.9	1.28348	0.360057	0.0452685	ELAV (embryonic lethal, abnormal vision)-like 1 (Hu antigen R)	Elavl1
28683	1444377_at	54.9	49.9	50.1	62.9	60	75.9	1.28341	0.359981	0.0469263
19927	1435621_at	115.9	134.4	97.5	153.6	138.7	154	1.28321	0.359756	0.0494767	fatty acyl CoA reductase 2	Far2
18189	1433883_at	204.3	185.3	198.8	219.8	271.3	263.2	1.28195	0.358341	0.0310386	tropomyosin 4	Tpm4
6791	1422485_at	421.6	381.5	404.4	517.1	564.6	466.1	1.28182	0.358196	0.0209745	SMAD family member 4	Smad4
37217	1452922_at	70.1	60.4	59.9	79.6	84.4	79.9	1.28099	0.357256	0.00824317	protein phosphatase 1, regulatory subunit 3D	Ppp1r3d
9037	1424731_at	39.4	47.5	44.8	56	51.9	60.8	1.28094	0.357205	0.0244751	notchless homolog 1 (Drosophila)	Nle1
39110	1454815_at	223.1	239	271.1	321.8	333.8	282.6	1.2796	0.355689	0.0309639	SERTA domain containing 2	Sertad2
5331	1421025_at	164.1	146.1	152.8	201	184.3	207	1.27927	0.355316	0.00738454	1-acylglycerol-3-phosphate O-acyltransferase 1 (lysophosphatidic acid acyltransferase, alpha)	Agpat1
41511	1457216_at	56.4	47.1	55.5	69	74.8	59.6	1.27925	0.355293	0.0499212
10136	1425830_a_at	281.8	268.6	287.6	344.9	387.2	339.4	1.27864	0.35461	0.00845822	cyclin-dependent kinase 2 interacting protein	Cinp
8875	1424569_at	62.8	66.5	75.8	87	80.1	95	1.27791	0.35379	0.0304078	DEAD (Asp-Glu-Ala-Asp) box polypeptide 46	Ddx46
27971	1443665_at	80.3	76.3	75.4	91.7	108.6	96	1.27716	0.352934	0.0154527	DENN/MADD domain containing 5B	Dennd5b
12738	1428432_at	162.6	147.8	172.9	194.7	220.6	201.8	1.27685	0.352585	0.0136963	zinc finger, CCHC domain containing 24	Zcchc24
26280	1441974_at	282.2	238.1	221.1	298.1	335.4	312.8	1.27637	0.352046	0.0321995	calcium/calmodulin-dependent protein kinase IV	Camk4
33790	1449490_at	51.4	54.5	48	59	74.6	62.8	1.27615	0.351802	0.0487635	methyl-CpG binding domain protein 4	Mbd4
39871	1455576_at	33.1	29.4	27.3	37.3	35.9	41.2	1.27394	0.3493	0.0241792	Ras and Rab interactor-like	Rinl
11736	1427430_at	89.4	94.3	90.3	104.2	124.3	120.5	1.27372	0.349051	0.0169697	SUN domain containing ossification factor	Suco
18668	1434362_at	197	195.5	157	247.7	231.1	221.1	1.2737	0.349029	0.0300819
2857	1418526_at	206.7	193.5	204.2	236.6	267.9	265.1	1.27333	0.348605	0.00696049	serine/arginine-rich splicing factor 10	Srsf10
16023	1431717_at	170.2	146.6	160	210.6	211.7	184.8	1.27328	0.34855	0.0175224	A kinase (PRKA) anchor protein 5	Akap5
22764	1438458_a_at	545.3	482.6	558.1	706.1	706.3	607	1.27327	0.348534	0.0233764	splicing factor proline/glutamine rich (polypyrimidine tract binding protein associated)	Sfpq
13691	1429385_at	50.2	65.6	52.6	68.5	73.8	72.1	1.27316	0.348413	0.038144	DDB1 and CUL4 associated factor 7	Dcaf7
4003	1419672_at	632.3	639.3	509.1	723.4	751.2	789.7	1.27158	0.346621	0.0255673	sparc/osteonectin, cwcv and kazal-like domains proteoglycan 1	Spock1
12674	1428368_at	637.2	775.5	779.4	871.1	934.2	981.5	1.27129	0.346296	0.0249155	Rho GTPase activating protein 21	Arhgap21
23754	1439448_x_at	289.9	262.7	292.9	310	398.4	366	1.27073	0.345655	0.0503519	transmembrane emp24 protein transport domain containing 9	Tmed9
11318	1427012_at	128.9	129.1	146.8	171.8	160.2	182.2	1.27026	0.34512	0.0137556	LanC (bacterial lantibiotic synthetase component C)-like 1	Lancl1
33589	1449289_a_at	707.6	648.4	686.2	860	866.7	867.4	1.27025	0.34511	0.000459605	beta-2 microglobulin	B2m
6800	1422494_s_at	39	33.8	43.8	46	53.2	48.9	1.27015	0.345004	0.0421806	cyclin-dependent kinase 20	Cdk20
4476	1420157_s_at	352.5	377.7	337.5	463.3	406.6	486.2	1.27011	0.344957	0.0219548	ATP-binding cassette, sub-family F (GCN20), member 1	Abcf1
40865	1456570_at	150.5	142.7	164.4	182.6	200.7	197.9	1.2701	0.344948	0.00828938	erythrocyte protein band 4.1-like 4b	Epb4.1l4b
19811	1435505_at	440.7	461.4	508.1	595.6	592.1	603.4	1.2701	0.344946	0.00327902	dystrophia myotonica-containing WD repeat motif	Dmwd
21069	1436763_a_at	579.1	516.7	505.9	620.3	709.7	702.8	1.26915	0.343864	0.0172784	Kruppel-like factor 9	Klf9
8976	1424670_s_at	269.7	276	270.2	328.3	351.1	355.4	1.26829	0.342888	0.0010809	zinc finger, FYVE domain containing 21	Zfyve21
18219	1433913_at	294.5	247.6	249.3	364.8	307.2	331.5	1.26801	0.342562	0.035642	URI1, prefoldin-like chaperone	Uri1
41847	1457552_at	112.1	126.5	96.9	140.6	135.9	148.9	1.26796	0.342507	0.0327744	zinc finger and BTB domain containing 21	Zbtb21
39601	1455306_at	118.9	119.5	136.8	168	156	151.7	1.26786	0.342392	0.0117839	family with sequence similarity 193, member A	Fam193a
23328	1439022_at	848.9	904.3	787.1	1130.1	1013	1077.6	1.26784	0.342375	0.0090587	phosphatase and actin regulator 1	Phactr1
13503	1429197_s_at	121.8	95.4	93.7	129	136.9	128.1	1.26729	0.341745	0.043645	RAB GTPase activating protein 1-like	Rabgap1l
43244	1458949_at	38.5	48.5	39.3	50.3	52.9	56.7	1.26603	0.340315	0.0391332	RIKEN cDNA 5330434G04 gene	5330434G04Rik
33833	1449533_at	95	113.6	116.2	149	132.2	130	1.26601	0.340289	0.0326339	transmembrane protein 100	Tmem100
20020	1435714_x_at	104.4	100.6	112.6	133.8	134.6	133.6	1.26574	0.339985	0.00137816	interleukin 17D	Il17d
33130	1448830_at	550.8	527.9	532	742	616.9	676.8	1.26386	0.337837	0.0183174	dual specificity phosphatase 1	Dusp1
3980	1419649_s_at	75.1	90.8	92.5	100.7	113.5	112.2	1.26316	0.337035	0.0299716	myosin IC	Myo1c
3766	1419435_at	59	67.1	70.6	74.2	83.1	91.1	1.26284	0.336668	0.044683	aldehyde oxidase 1	Aox1
7893	1423587_a_at	112.1	121.6	116.2	160.7	154.8	126.2	1.26236	0.336124	0.0497662	exosome component 10	Exosc10
14054	1429748_at	38.7	36.7	41.9	50.5	44.9	52.5	1.26087	0.334419	0.0202472	RIKEN cDNA B930003M22 gene	B930003M22Rik
8118	1423812_s_at	373.2	370.4	320.2	434.4	417.7	488.9	1.26058	0.334082	0.0284441	vesicular, overexpressed in cancer, prosurvival protein 1	Vopp1
20047	1435741_at	533.9	517	492.5	672	584.1	689.2	1.2604	0.333881	0.0181286	phosphodiesterase 8B	Pde8b
1281	1416950_at	67	64.9	69.4	80.5	91.4	81.8	1.26031	0.333776	0.00895085	tumor necrosis factor, alpha-induced protein 8	Tnfaip8
5070	1420764_at	401.3	392.5	445.5	526.7	506.7	527.6	1.25958	0.332945	0.00379411	scrapie responsive gene 1	Scrg1
5659	1421353_at	223.3	208.5	226.1	258.3	280.2	289.9	1.25916	0.332459	0.0062945	phosphodiesterase 7B	Pde7b
10541	1426235_a_at	621.6	588.7	536.7	654.5	725.1	819.8	1.25896	0.33223	0.048892	glutamate-ammonia ligase (glutamine synthetase)	Glul
38141	1453846_at	50.2	58.1	48.9	62.2	62.5	73.2	1.25891	0.33217	0.0425564	chondroitin polymerizing factor 2	Chpf2
21849	1437543_at	179.7	224.3	192.8	251.3	242.2	257.8	1.25888	0.332142	0.0211668	far upstream element (FUSE) binding protein 1	Fubp1
35681	1451386_at	47.5	51.6	42.9	57.4	64.7	56.5	1.25775	0.330841	0.0278765	biliverdin reductase B (flavin reductase (NADPH))	Blvrb
11527	1427221_at	64.4	69.4	57.4	82.5	86.7	71.2	1.25732	0.330354	0.047243	solute carrier family 6 (neurotransmitter transporter), member 20A	Slc6a20a
11505	1427199_at	144.9	164.5	153.6	206.7	200.7	174	1.25572	0.328519	0.0267761	furry homolog-like (Drosophila)	Fryl
24718	1440412_at	89.4	93.4	81.6	121.4	105.2	105.1	1.25454	0.327157	0.0251496
2858	1418527_a_at	242.3	241.2	228.9	268.8	337.4	287.5	1.25449	0.327103	0.0446181	serine/arginine-rich splicing factor 10	Srsf10
10633	1426327_s_at	79.2	88.6	79	96	98.1	115.5	1.25446	0.327063	0.0393744	zinc finger protein 91 /// Zfp91-Cntf readthrough transcript (NMD candidate)	Zfp91Cntf
40388	1456093_at	109.2	102.9	113.9	129.1	136.1	143.1	1.25245	0.324758	0.00596385	zinc finger protein 536	Zfp536
19125	1434819_at	140.5	170.2	150.5	211	179.6	186.9	1.25217	0.324428	0.0396381	beta galactoside alpha 2,6 sialyltransferase 2	St6gal2
22355	1438049_at	520.8	540.2	558.5	642.7	668.9	716	1.25199	0.324225	0.00481367	uncharacterized LOC101056057	LOC101056057
1203	1416872_at	102.4	110	116.7	132.5	144.1	135.4	1.2519	0.324118	0.00692065	tetraspanin 6	Tspan6
43898	1459603_at	12.7	9.8	10.2	13.8	13.1	14	1.25076	0.32281	0.0447986	PRELI domain containing 2	Prelid2
11770	1427464_s_at	1445.8	1275.3	1175.4	1674.9	1721.2	1469.5	1.24871	0.320439	0.0431171	heat shock protein 5	Hspa5
36030	1451735_at	86.9	110.8	88.6	124.6	117.6	115.3	1.24869	0.320416	0.0442321	ADP-ribosylation factor related protein 1	Arfrp1
33723	1449423_at	153.6	142.5	160.1	173.5	190	206.1	1.24858	0.320283	0.0243324	microtubule associated serine/threonine kinase 1	Mast1
37292	1452997_at	1743.3	1489.2	1596.8	1979.8	2001.6	2040.7	1.24699	0.318453	0.00630593	cadherin 11 pseudogene	2610005L07Rik
2518	1418187_at	137.6	121	128.6	164.8	159	158.7	1.24613	0.31745	0.0036143	receptor (calcitonin) activity modifying protein 2	Ramp2
3790	1419459_a_at	122.3	101	121.2	144.6	144.4	140.2	1.24586	0.317146	0.0162265	magnesium transporter 1	Magt1
13057	1428751_at	203.4	182.3	226.8	254.1	244.6	264	1.24522	0.316406	0.0233483	PARK2 co-regulated	Pacrg
25258	1440952_at	80.7	77.2	86.2	90.3	100.8	112.6	1.24416	0.315175	0.0460622
22691	1438385_s_at	313.9	353.9	305.1	377.7	402.1	430.1	1.2436	0.314524	0.0207457	glutamic pyruvate transaminase (alanine aminotransferase) 2	Gpt2
10881	1426575_at	111.8	103.5	103.7	139.9	133.2	123.6	1.24357	0.314492	0.00903303	sphingomyelin synthase 1	Sgms1
23269	1438963_s_at	137.7	125.5	128.5	161.7	156.3	168.9	1.24304	0.313876	0.00358687	TCF3 (E2A) fusion partner	Tfpt
570	1416239_at	231.6	259.7	277.7	349.8	308.2	297.6	1.24265	0.313423	0.0404686	argininosuccinate synthetase 1 /// argininosuccinate synthase pseudogene	Gm5424
1864	1417533_a_at	153.3	175.2	132.7	187.9	201.5	183.5	1.24219	0.312891	0.0500313	integrin beta 5	Itgb5
24454	1440148_at	1126.1	1255.1	1221.8	1575.1	1589.5	1308.7	1.24155	0.312141	0.0429837	G protein-coupled receptor 6	Gpr6
17639	1433333_at	342.9	406.1	421.5	500.9	495.7	455.5	1.24058	0.311016	0.0285108	RIKEN cDNA C030004M13 gene	C030004M13Rik
7872	1423566_a_at	1694.4	1701	1603.4	2047.4	2174.8	1977.7	1.24028	0.310663	0.00367542	heat shock 105kDa/110kDa protein 1	Hsph1
27376	1443070_at	102.5	109.7	85.6	120.8	119.5	129	1.24009	0.31045	0.0369128
13528	1429222_at	49.5	51	53.8	62.4	62.1	66.8	1.23979	0.310099	0.00334374	pseudouridine synthase 3	Pus3
22023	1437717_x_at	737.1	719	770.6	840.9	1002.1	916.5	1.23928	0.3095	0.0222043	cadherin 11 pseudogene	2610005L07Rik
1317	1416986_a_at	180.1	150.3	161.6	204.7	190.7	214.3	1.23923	0.309441	0.023878	signal-regulatory protein alpha	Sirpa
24511	1440205_at	54.8	59.3	46.7	66.1	65	68	1.23818	0.308226	0.0280631	zinc finger, MYND domain containing 19	Zmynd19
19942	1435636_at	263.5	295.2	313.6	343.6	349.3	387	1.23799	0.308001	0.0257657	argonaute RISC catalytic subunit 2	Ago2
31999	1447693_s_at	558.1	491.4	596.3	698.5	662.6	676.3	1.23794	0.30794	0.0157294	neogenin	Neo1
33160	1448860_at	726	773.9	691.5	790.8	945.1	976.6	1.23779	0.30777	0.0491385	rad and gem related GTP binding protein 2	Rem2
12599	1428293_at	495.7	530.8	473.5	620.9	590.6	644.6	1.2374	0.307312	0.00654677	biorientation of chromosomes in cell division 1	Bod1
12294	1427988_s_at	183.9	156	183.7	226.4	198.5	222.9	1.2372	0.307083	0.0315562	scaffold attachment factor B2	Safb2
12277	1427971_at	204.9	184.1	208.3	254.4	254	230.5	1.23707	0.306923	0.0124938	cell division cycle 73, Paf1/RNA polymerase II complex component	Cdc73
7299	1422993_s_at	149.2	177	139.4	203.3	186.5	186	1.23668	0.306477	0.0435947	Aly/REF export factor /// Aly/REF export factor 2	Alyref
2352	1418021_at	188.3	167.9	176.8	207.6	225.9	225.6	1.23659	0.306362	0.00764204	complement component 4A (Rodgers blood group) /// complement component 4B (Chido blood group)	C4a
13048	1428742_at	129.7	126.3	115.5	137.6	152.5	169.2	1.23634	0.306075	0.0439796	F-box protein 45	Fbxo45
20321	1436015_s_at	492.6	466	415.6	585	558.3	555	1.23585	0.305499	0.0115975	serine/threonine kinase 4	Stk4
20912	1436606_at	113.4	96	87.9	120.4	129.6	117.4	1.23579	0.305432	0.0492299
35429	1451134_a_at	311	359.6	310.2	389.5	409.1	413.2	1.23552	0.305121	0.0126223	TM2 domain containing 2	Tm2d2
17970	1433664_at	311.2	298.1	327.8	392.6	420.7	344.1	1.23509	0.304613	0.0375097	ubiquitin-conjugating enzyme E2Q (putative) 2	Ube2q2
6641	1422335_at	138.7	154.1	134.4	167.1	164.9	195.4	1.23455	0.303986	0.0439052	adrenergic receptor, alpha 2c	Adra2c
1566	1417235_at	271.5	241.8	252.1	287.3	325.8	331.5	1.23413	0.30349	0.0218596	EH-domain containing 3	Ehd3
30594	1446288_at	99.5	81.5	83.6	108.6	108.7	109.1	1.23356	0.302828	0.02228	expressed sequence C78692	C78692
41768	1457473_at	110.1	104.4	97.4	138.7	113.7	132.2	1.23309	0.302275	0.043882	chromodomain helicase DNA binding protein 1	Chd1
34985	1450690_at	1055.7	1087.1	1049.1	1415.9	1329	1184.3	1.23099	0.29982	0.0230678	RAN binding protein 2	Ranbp2
39577	1455282_x_at	62.4	57.1	65.4	73.8	73.8	80	1.23094	0.299755	0.0111119	aminolevulinic acid synthase 1	Alas1
11648	1427342_at	116.3	98.7	100.7	129.2	124.1	134.9	1.22965	0.298246	0.0192861	FAST kinase domains 1	Fastkd1
36212	1451917_a_at	211.2	197.5	179	232.5	257.8	232	1.22903	0.297518	0.0237668	doublecortin-like kinase 1	Dclk1
28691	1444385_at	42.7	52.7	54	60.2	58.6	64.8	1.22892	0.297386	0.0472183
36543	1452248_at	155.8	164.9	158	211	198.6	178.6	1.22874	0.297185	0.0205874	pleckstrin homology domain containing, family G (with RhoGef domain) member 5	Plekhg5
35568	1451273_x_at	33.9	34.3	36.3	41	39.2	48.2	1.22871	0.297142	0.0489469	cap methyltransferase 2	Cmtr2
7540	1423234_at	299.4	256.3	274.1	314.9	348.6	355.9	1.22849	0.296885	0.023663	proteasome (prosome, macropain) 26S subunit, non-ATPase, 5	Psmd5
36672	1452377_at	242.4	240	261.4	285.2	313.7	314.4	1.22788	0.296174	0.00862481	lysine (K)-specific methyltransferase 2A	Kmt2a
366	1416035_at	213.8	223.4	235.1	281.7	291.2	252.3	1.22743	0.295639	0.0182656	hypoxia inducible factor 1, alpha subunit	Hif1a
13716	1429410_at	235.3	219.1	258.3	287.1	268.9	318.1	1.22646	0.294503	0.042527	enhancer of yellow 2 homolog (Drosophila)	Eny2
12595	1428289_at	2129.4	2057.2	1860.8	2431.4	2399.9	2583.5	1.22611	0.294093	0.00974113	Kruppel-like factor 9	Klf9
7604	1423298_at	767.6	698.5	719.3	922.2	965.9	790.6	1.22573	0.293636	0.0437062	adducin 3 (gamma)	Add3
1702	1417371_at	617.3	684	598.2	826.2	761.1	740.5	1.22548	0.293347	0.0176148	pellino 1	Peli1
7008	1422702_at	404.8	383.7	463.4	500.5	487.8	545.7	1.22534	0.293179	0.0336935	antizyme inhibitor 1	Azin1
24136	1439830_at	178.6	187.1	209	221.8	240.9	241.1	1.22464	0.292356	0.01783	mitogen-activated protein kinase kinase kinase 5	Map3k5
1413	1417082_at	511.9	531.6	546.4	670.7	662.3	613.5	1.22429	0.291946	0.00435339	acidic (leucine-rich) nuclear phosphoprotein 32 family, member B	Anp32b
21304	1436998_at	472.3	560.6	549.5	639.4	655.4	642.1	1.22403	0.291635	0.0138125	sosondowah ankyrin repeat domain family member A	Sowaha
14363	1430057_s_at	50.8	60.6	59.5	69.6	74.5	65	1.22352	0.291041	0.0370595	leucine rich repeat containing 57	Lrrc57
37128	1452833_at	2680.4	2913.5	2243.5	3170.7	3201.2	3210.9	1.2227	0.290072	0.0416734	Rap guanine nucleotide exchange factor (GEF) 2	Rapgef2
22398	1438092_x_at	1132.1	1376.6	1240.6	1538	1620.6	1425.3	1.2226	0.289954	0.0372562	H2A histone family, member Z	H2afz
18001	1433695_at	360.4	356.5	357.5	389	447.4	474.4	1.22003	0.286916	0.0354119	cannabinoid receptor interacting protein 1	Cnrip1
37037	1452742_at	165.2	163.7	151.1	206.7	190.1	188.8	1.22	0.286881	0.00848408	trafficking protein, kinesin binding 1	Trak1
18136	1433830_at	807.8	897.6	941.6	1056.2	1133.2	1037.4	1.21904	0.285746	0.0169935	heterogeneous nuclear ribonucleoprotein A2/B1	Hnrnpa2b1
10019	1425713_a_at	170.7	151	157.7	200.3	183.8	200.1	1.21861	0.285232	0.0117857	ring finger protein 146	Rnf146
10711	1426405_at	76.3	81.9	86.3	100.6	104.8	92.5	1.2184	0.284994	0.0183416	ring finger protein 11	Rnf11
39732	1455437_at	1360.4	1248	1185	1652.8	1548.6	1418.8	1.21796	0.284464	0.0315213	SIK family kinase 3	Sik3
32738	1448438_at	186.6	218.8	205.3	272.9	229.5	241.1	1.21746	0.283869	0.05035	Der1-like domain family, member 2	Derl2
8217	1423911_at	459	502.8	460.9	559.9	617.4	554.6	1.21733	0.283724	0.0139448	protein phosphatase 2, regulatory subunit B', alpha	Ppp2r5a
13275	1428969_at	589.2	593.3	535	710.4	646.8	732.3	1.21659	0.282848	0.0175283	trafficking protein particle complex 8	Trappc8
39763	1455468_at	280.8	257.9	317.8	348.5	350.1	342.5	1.21553	0.281583	0.0249964	dpy-19-like 3 (C. elegans)	Dpy19l3
10553	1426247_at	99.9	115.8	114.9	143.6	121.4	136.8	1.21537	0.281391	0.0467501	serine/threonine kinase 24	Stk24
31843	1447537_at	207.7	209.3	200.8	245.7	235.8	269.3	1.21528	0.281289	0.0124917	RIKEN cDNA 1500032P08 gene /// complement factor properdin	1500032P08Rik
3595	1419264_at	61.8	63	65.2	84.4	72.8	73.6	1.21474	0.280644	0.024592	POC5 centriolar protein homolog (Chlamydomonas)	Poc5
39906	1455611_at	93.7	93.4	94.8	106.3	109.4	126.6	1.21426	0.280078	0.0334842	protein inhibitor of activated STAT 1	Pias1
44486	1460193_at	372	318.2	334.8	416.8	418.3	409.5	1.21424	0.280058	0.0105262	suppression of tumorigenicity 13	St13
18030	1433724_at	284.8	346	300	362.7	382.9	384.5	1.21412	0.279907	0.0279397	DNA segment, Chr 15, ERATO Doi 621, expressed	D15Ertd621e
20076	1435770_at	117.7	117.9	133.8	144.9	157.6	145.9	1.21386	0.279602	0.0172108	thioredoxin-related transmembrane protein 4	Tmx4
41199	1456904_at	100.7	99	104.7	129.9	114	125.4	1.21321	0.278825	0.0125891
18555	1434249_s_at	415.4	426.8	493.7	569.6	537.9	512.3	1.21252	0.278004	0.0327032	tripartite motif-containing 9	Trim9
30530	1446224_at	61.4	51.3	51.6	65	63.8	70.4	1.21242	0.277885	0.0402982	HECT domain containing 2	Hectd2
15700	1431394_a_at	646.3	632.6	525.7	756.4	708	723.3	1.21229	0.277736	0.0349554	leucine-rich repeat kinase 2	Lrrk2
21887	1437581_at	44.5	45.4	47.2	53.7	52.5	59.9	1.21152	0.276824	0.0163488	zinc finger protein 800	Zfp800
888	1416557_a_at	286.2	265.4	292.6	322.3	376.8	323.4	1.21121	0.276444	0.0397064	elongation factor Tu GTP binding domain containing 2	Eftud2
8015	1423709_s_at	405.4	396.8	415.5	450.6	512.4	511.8	1.21114	0.276361	0.0155749	phenylalanyl-tRNA synthetase, beta subunit	Farsb
1798	1417467_a_at	108.8	92	92.9	119.5	110.7	125.5	1.2111	0.276318	0.0409202	transcriptional adaptor 3	Tada3
44298	1460005_at	177.5	219.5	199.6	248.5	222.7	251.3	1.21103	0.276234	0.0504732	biorientation of chromosomes in cell division 1-like	Bod1l
34318	1450023_at	119.8	114	112.3	155.6	133.4	130	1.21063	0.275761	0.0435454	GTP binding protein 1	Gtpbp1
12284	1427978_at	167.5	167.1	150.5	195.4	201.8	190	1.21047	0.27557	0.0065621	EF-hand calcium binding domain 14	Efcab14
36435	1452140_at	145.1	147.2	143.1	180.4	158.4	187.7	1.20923	0.274092	0.0268363	TBC1 domain family, member 20	Tbc1d20
10566	1426260_a_at	60.4	60.9	71.8	77.6	80.1	75.8	1.20922	0.274074	0.0264661	UDP glucuronosyltransferase 1 family, polypeptide A1 /// UDP glycosyltransferase 1 family, polypeptide A10 /// UDP glucuronosyltransferase 1 family, polypeptide A2 /// UDP glucuronosyltransferase 1 family, polypeptide A5 /// UDP glucuronosyltransferase 1 family, polypeptide A6A /// UDP glucuronosyltransferase 1 family, polypeptide A6B /// UDP glucuronosyltransferase 1 family, polypeptide A7C /// …	Ugt1a1
31546	1447240_at	101.5	98.4	84.6	121.3	115.6	107	1.20879	0.27356	0.0408871
5240	1420934_a_at	131.4	133.1	146.2	182.8	154	159.6	1.20867	0.273418	0.0458104	serine/arginine repetitive matrix 1	Srrm1
6599	1422293_a_at	561.1	497.7	498.5	662.4	629.1	590.4	1.20844	0.273143	0.0215764	potassium channel tetramerisation domain containing 1	Kctd1
19137	1434831_a_at	238.2	224.6	250.3	301.2	299.3	261.1	1.20825	0.272914	0.0300789	forkhead box O3	Foxo3
20537	1436231_at	486.7	523.6	538	648.3	629.9	592.5	1.20823	0.272893	0.00869673	RIKEN cDNA 2900052N01 gene	2900052N01Rik
37928	1453633_a_at	33.6	31.2	30.5	39.1	38.4	37.6	1.20776	0.27234	0.00308984	ring finger protein 41	Rnf41
40636	1456341_a_at	6140.5	5806.9	5308.5	7174.1	6466.8	7197.8	1.20763	0.272176	0.0247337	Kruppel-like factor 9	Klf9
27309	1443003_at	9.8	12.5	11.9	13.6	13.6	14.1	1.2076	0.272145	0.0471913
36682	1452387_a_at	94.2	100	103.7	113	124.5	121.9	1.20645	0.270762	0.0099488	angiomotin-like 2	Amotl2
37131	1452836_at	229.4	277.5	240.7	284	302.3	315.3	1.20599	0.270221	0.0400417	lipin 2	Lpin2
23026	1438720_at	214.5	176.6	191.2	232.3	229.3	240.5	1.20574	0.269914	0.0257576	RIKEN cDNA 9330159F19 gene	9330159F19Rik
2388	1418057_at	690.8	584.5	608.6	758.8	748.7	763.8	1.20564	0.269796	0.0164637	T cell lymphoma invasion and metastasis 1	Tiam1
27039	1442733_at	36.2	35.5	41.7	44.6	48.1	44	1.20547	0.269593	0.0294217	centrosomal protein 162	Cep162
36580	1452285_a_at	1540.7	1634.8	1881.7	2069.7	1955.6	2069.2	1.20511	0.269169	0.0333467	eukaryotic translation initiation factor 3, subunit F	Eif3f
35790	1451495_at	742	639.1	695.3	792.3	833	876.7	1.20497	0.268997	0.0210331	WW domain containing adaptor with coiled-coil	Wac
8881	1424575_at	393.4	391.8	361.6	476.6	483.8	420.5	1.20413	0.267995	0.0257124	intraflagellar transport 22	Ift22
1264	1416933_at	259.3	225.5	246.1	304.1	296.8	279.1	1.204	0.267829	0.0156855	P450 (cytochrome) oxidoreductase	Por
40131	1455836_at	179.8	190.7	183.6	218.4	227.3	221.4	1.20393	0.267757	0.000800121	poly (A) polymerase alpha	Papola
35884	1451589_at	291.5	314.4	277.9	327.1	359.1	377.6	1.20367	0.267435	0.0299934	GATS protein-like 2	Gatsl2
38051	1453756_at	82.3	82.9	73.1	92.7	93.2	100.7	1.20269	0.26626	0.0170514	RIKEN cDNA 2900075N08 gene /// neuroligin 3	2900075N08Rik
7936	1423630_at	170.5	190.5	172.3	204.5	201	235.7	1.20233	0.265827	0.0477401	cytoglobin	Cygb
740	1416409_at	369.7	402.6	423.4	447.8	475.1	514.2	1.20189	0.265305	0.0315841	acyl-Coenzyme A oxidase 1, palmitoyl	Acox1
39628	1455333_at	601.1	568.4	543.9	613.5	734.7	710.2	1.20135	0.264661	0.0470223	tensin 3	Tns3
39773	1455478_at	104.7	109	112.6	140.8	123.9	127.1	1.20074	0.263918	0.0182256	protein tyrosine phosphatase, receptor type, f polypeptide (PTPRF), interacting protein (liprin), alpha 1	Ppfia1
11052	1426746_at	247.8	264.1	269.3	308.9	303.7	325.1	1.20033	0.263434	0.00465211	RIKEN cDNA 1810026J23 gene	1810026J23Rik
247	1415916_a_at	324.5	279.3	273.4	374	328.7	350.1	1.20018	0.263254	0.0479637	methylenetetrahydrofolate dehydrogenase (NADP+ dependent), methenyltetrahydrofolate cyclohydrolase, formyltetrahydrofolate synthase	Mthfd1
22274	1437968_at	496.1	528.8	463.5	622.9	578.5	584.4	1.19981	0.262808	0.0133662	glutamate receptor, ionotropic, NMDA1 (zeta 1)	Grin1
12400	1428094_at	340.2	401.2	337.4	437.4	439.8	417.1	1.19976	0.262745	0.0310418	lysosomal-associated membrane protein 2	Lamp2
73	1415742_at	176.5	175.3	179.6	196.9	233.2	207.3	1.19947	0.262401	0.0313457	ancient ubiquitous protein 1	Aup1
3552	1419221_a_at	418.2	381.4	364.2	502.4	460.8	432.7	1.19943	0.262352	0.0398094	regulator of G-protein signaling 14	Rgs14
5203	1420897_at	113.5	115.9	125.8	138.6	150.1	137.3	1.19932	0.262222	0.01307	synaptosomal-associated protein 23	Snap23
12737	1428431_at	269.3	286.9	283.1	308.7	331.7	365.6	1.19862	0.261372	0.032928	zinc finger, CCHC domain containing 24	Zcchc24
793	1416462_at	998.9	918.7	963.7	1250.1	1082.7	1120.2	1.19842	0.26113	0.0268642	cell cycle associated protein 1	Caprin1
815	1416484_at	1718.5	1603	1890.6	2070.9	2111	2062.6	1.19808	0.260721	0.0154221	tetratricopeptide repeat domain 3	Ttc3
17861	1433555_at	103.9	103.8	107.6	132.9	130.2	114.6	1.19791	0.260516	0.0235378	ELL associated factor 1	Eaf1
39200	1454905_at	74.7	75.1	72.3	97.5	87.1	81.4	1.19766	0.260217	0.0379294	inhibitor of Bruton agammaglobulinemia tyrosine kinase	Ibtk
18784	1434478_at	309	300.2	281.7	359.2	370.3	337.3	1.19744	0.259954	0.0096315	headcase homolog (Drosophila)	Heca
33642	1449342_at	345.3	374.5	348.2	413.7	445.9	419.1	1.19728	0.259766	0.0067061	protein tyrosine phosphatase-like (proline instead of catalytic arginine), member b	Ptplb
20266	1435960_at	901	964.2	992	1135	1084	1201.8	1.19726	0.259732	0.0124144	PNMA-like 2	Pnmal2
2050	1417719_at	101.2	107.9	106.7	119.5	132.6	125.9	1.19696	0.259375	0.00856724	sin3 associated polypeptide	Sap30
20635	1436329_at	1870.7	1873.9	1832.4	2333.6	2243.6	2094.9	1.19636	0.258652	0.00673869	early growth response 3	Egr3
24384	1440078_at	87.5	93.8	83.2	102.1	98.2	116	1.19584	0.258026	0.0499629
8029	1423723_s_at	505.9	449.8	481	546.8	580.7	588.5	1.1944	0.256291	0.0107864	TAR DNA binding protein	Tardbp
17974	1433668_at	791.4	806	804.5	980.7	984.1	902.5	1.19376	0.255517	0.00457964	proline-rich nuclear receptor coactivator 1	Pnrc1
20805	1436499_at	337.6	376.8	371.1	438	404.2	453.4	1.19355	0.255261	0.0210598	sphingomyelin synthase 1	Sgms1
36954	1452659_at	1109.8	1109.3	1154.6	1313.7	1450.2	1261.2	1.19308	0.254693	0.0203899	DEK oncogene (DNA binding)	Dek
17694	1433388_at	178.2	155.1	143.7	190.3	186.2	192.5	1.19287	0.254439	0.0410207	RIKEN cDNA 2900022M07 gene	2900022M07Rik
10666	1426360_at	222.7	229.2	204.5	253.1	285.5	244.4	1.19287	0.254437	0.0438941	zinc finger, BED domain containing 6 /// zinc finger CCCH type containing 11A	Zbed6
6122	1421816_at	157.1	155.1	150.4	179	177.5	195.3	1.19282	0.25438	0.00789457	glutathione reductase	Gsr
15343	1431037_a_at	188	178.5	178.6	209.9	228.5	211.8	1.19281	0.254363	0.00637541	ELAV (embryonic lethal, abnormal vision)-like 1 (Hu antigen R)	Elavl1
22223	1437917_at	162.8	148.9	148.1	186	188.5	173.5	1.19182	0.253169	0.0115371	RIKEN cDNA D530037H12 gene	D530037H12Rik
20400	1436094_at	996.4	878.1	860.2	1072.9	1097.6	1086.4	1.19095	0.252117	0.015892	VGF nerve growth factor inducible	Vgf
40181	1455886_at	202.2	193.8	203.7	244.2	227.8	242.2	1.19093	0.252087	0.00315888	Casitas B-lineage lymphoma	Cbl
39016	1454721_at	422.9	380	405.8	442.1	500.8	496	1.19045	0.25151	0.027297	apoptosis resistant E3 ubiquitin protein ligase 1	Arel1
36970	1452675_at	200.5	205	191.4	234.4	227.9	248.2	1.19032	0.251345	0.00625381	RNA binding motif protein 22	Rbm22
33448	1449148_a_at	221.4	213.6	209.4	239	270.1	257.9	1.19025	0.25127	0.0135815	putative homeodomain transcription factor 1	Phtf1
32996	1448696_at	47.9	55.4	53	61	65.6	59.4	1.19002	0.250985	0.0265988	hephaestin	Heph
5120	1420814_at	1413.1	1461.2	1567.4	1688	1730.8	1866.3	1.18988	0.250819	0.0162715	guanosine diphosphate (GDP) dissociation inhibitor 2	Gdi2
39332	1455037_at	367	351.5	389.2	403.7	453.2	460.8	1.18958	0.250455	0.0289291	plexin A2	Plxna2
13533	1429227_x_at	999	1077.9	883.6	1157.1	1164.5	1198.6	1.18906	0.249817	0.0321237	nucleosome assembly protein 1-like 1	Nap1l1
32286	1447980_s_at	257.5	265.9	258.3	320.5	297.2	311.6	1.18882	0.249529	0.0025218	small G protein signaling modulator 1	Sgsm1
1519	1417188_s_at	171	156	175.3	198.1	192.4	206.6	1.18873	0.249423	0.0115609	ubiquitin-conjugating enzyme E2K	Ube2k
41329	1457034_at	175.9	147.5	180.4	199.8	191.1	207.7	1.18817	0.248741	0.0497321	family with sequence similarity 208, member A	Fam208a
8500	1424194_at	75.8	72.1	68.4	88.6	86.6	81.7	1.1877	0.248173	0.0102505	RCSD domain containing 1	Rcsd1
23613	1439307_at	76.4	74	75.9	95	86.8	86.9	1.18736	0.24776	0.0073673
13244	1428938_at	349.7	355.7	391.3	402.4	447.9	451.8	1.18729	0.247671	0.0288119	guanine nucleotide binding protein, alpha q polypeptide	Gnaq
7331	1423025_a_at	946.4	794.9	880.6	1019.3	1024.8	1067.7	1.18685	0.247137	0.02455	predicted gene, 21949 /// schwannomin interacting protein 1	Gm21949
26269	1441963_at	1410.6	1637	1465.7	1827	1831.1	1698.5	1.18685	0.247135	0.0254555	leucine zipper, putative tumor suppressor family member 3	Lzts3
17825	1433519_at	2217.9	2103.1	2004.1	2372.7	2502.3	2623	1.18544	0.245418	0.0147056	nuclear casein kinase and cyclin-dependent kinase substrate 1	Nucks1
40322	1456027_at	131.9	136.4	127.2	149	156.8	162.8	1.18483	0.244679	0.00708465	RNA binding motif protein 41	Rbm41
13095	1428789_at	311.6	332.6	305.9	382.4	367.1	376.1	1.18472	0.244543	0.00320261	Ral GEF with PH domain and SH3 binding motif 2	Ralgps2
20216	1435910_at	60	59.6	55	69.3	70.9	66.6	1.18442	0.244183	0.00621131	fatty acid desaturase 3	Fads3
37184	1452889_at	116.1	120.2	107.2	141.2	136.1	129.4	1.18399	0.243655	0.0148498	phospholysine phosphohistidine inorganic pyrophosphate phosphatase	Lhpp
33048	1448748_at	107.4	115.6	106	126	127.2	136.2	1.18359	0.243165	0.0101837	pleckstrin	Plek
7699	1423393_at	540.9	445.4	481.3	608.4	557	571.5	1.1835	0.243056	0.0475874	chloride intracellular channel 4 (mitochondrial)	Clic4
11591	1427285_s_at	325.8	275.7	309	341.6	360.7	375.2	1.18342	0.242957	0.0343634	metastasis associated lung adenocarcinoma transcript 1 (non-coding RNA)	Malat1
1460	1417129_a_at	1576.7	1532.1	1576.6	1964.9	1835.6	1744.2	1.1834	0.242937	0.012079	Meis homeobox 2	Meis2
21563	1437257_at	107.9	101.5	108.2	117.3	135	123.5	1.18325	0.242754	0.026109	WD repeat domain 47	Wdr47
19602	1435296_at	165	151.2	150	198.8	170	182.8	1.18318	0.242673	0.0416043	adrenergic receptor, alpha 2c	Adra2c
1681	1417350_at	97.4	90.9	90.4	109.1	113	107.5	1.18263	0.242003	0.00366687	biogenesis of lysosomal organelles complex-1, subunit 6, pallidin	Bloc1s6
220	1415889_a_at	1908.3	1678.3	2033.6	2223.8	2303.7	2117.6	1.18236	0.241669	0.0434334	heat shock protein 90, beta (Grp94), member 1	Hsp90b1
11070	1426764_at	649.7	634.5	660.4	742.1	737	817.3	1.18091	0.239901	0.0122594	ornithine decarboxylase antizyme 2	Oaz2
21046	1436740_at	757.8	774.5	758.9	831.3	969.1	904.8	1.18069	0.239632	0.02641	cadherin 11 pseudogene	2610005L07Rik
13721	1429415_at	136.8	148.3	136.3	158.9	170.2	168.4	1.18059	0.239506	0.00849707	zinc finger, MYND-type containing 8	Zmynd8
22721	1438415_s_at	67.1	65.7	71.1	81	75.4	84.3	1.18048	0.239374	0.0160192	Yip1 domain family, member 2	Yipf2
44687	1460395_at	492.5	505.7	436.9	586.2	534.2	573	1.17999	0.238772	0.0304234	NudC domain containing 3	Nudcd3
20151	1435845_at	207.7	231.3	228.5	277.5	261.8	248.3	1.17993	0.238695	0.0236289
19521	1435215_at	223.2	224.3	259.2	280.7	265.2	287.7	1.17957	0.238257	0.035561	synergin, gamma	Synrg
21957	1437651_a_at	125.3	133.1	138	162.9	140.9	163.7	1.17936	0.238009	0.0467116	dystrobrevin, beta	Dtnb
12846	1428540_at	762.9	689.3	799.6	923.1	889.2	842.7	1.17906	0.237633	0.0281603	family with sequence similarity 115, member A	Fam115a
1978	1417647_at	294.1	307.2	313.4	379.6	345.3	353.5	1.17897	0.237522	0.0098572	sorting nexin 5	Snx5
9073	1424767_at	155.4	177.6	167.2	197.4	193.4	198.6	1.17833	0.236742	0.010796	cadherin 22	Cdh22
739	1416408_at	859.1	890.2	798	1038.1	1017.7	945.6	1.17827	0.236667	0.0178168	acyl-Coenzyme A oxidase 1, palmitoyl	Acox1
5394	1421088_at	37.6	39.3	44.3	50.2	46	46.6	1.17822	0.236606	0.0399762	glypican 4	Gpc4
1824	1417493_at	491.6	451.7	533.7	572.7	573.2	594.2	1.17813	0.2365	0.0238212	Bmi1 polycomb ring finger oncogene	Bmi1
11420	1427114_at	338.2	408.9	372.7	443.4	440.3	435.5	1.17807	0.236422	0.0317966	tetratricopeptide repeat domain 19	Ttc19
37251	1452956_a_at	184.5	210.3	201.5	232.7	218	251.6	1.17776	0.236049	0.0456163	interferon, alpha-inducible protein 27	Ifi27
9378	1425072_at	30	30.6	32.9	37	38.2	34.9	1.17754	0.235776	0.0133693	S-phase kinase-associated protein 2 (p45)	Skp2
25231	1440925_at	84.1	82.9	75.3	100.7	90.2	94.4	1.17747	0.235685	0.0252028	predicted gene, 19773	Gm19773
22334	1438028_at	115.6	127.3	119.6	136.9	152.2	137.7	1.17738	0.235579	0.0238577	regulation of nuclear pre-mRNA domain containing 2	Rprd2
132	1415801_at	341.7	321.7	380.8	420.1	414.6	394.4	1.17707	0.235204	0.0317255	gap junction protein, alpha 1	Gja1
37467	1453172_at	145.7	145.3	160.3	178.5	174.3	178.4	1.17704	0.235168	0.00653067	heat shock protein 70 family, member 13	Hspa13
33252	1448952_at	1419.6	1311.6	1287	1631	1663.7	1430.3	1.1759	0.233765	0.0478489	chromodomain helicase DNA binding protein 3, opposite strand	Chd3os
40518	1456223_at	65.3	68.8	64.3	73	83.9	76.3	1.1754	0.233156	0.0296313
6776	1422470_at	1124	1027.3	983.3	1196.6	1236	1250.6	1.17501	0.232678	0.0148234	BCL2/adenovirus E1B interacting protein 3	Bnip3
40647	1456352_a_at	304.8	334.6	346.5	386.3	397.4	374.4	1.17466	0.232247	0.0150962	splicing factor 3b, subunit 2	Sf3b2
557	1416226_at	109.1	103.7	110.2	128.4	134.9	116	1.1743	0.231805	0.0334497	actin related protein 2/3 complex, subunit 1B /// predicted pseudogene 5637	Arpc1b
1659	1417328_at	177.7	159.1	168.3	211.6	180.6	200.8	1.17402	0.231463	0.0500011	excision repair cross-complementing rodent repair deficiency, complementation group 1	Ercc1
22936	1438630_x_at	1268.1	1482.9	1417.2	1557.8	1630.7	1702.9	1.1735	0.230823	0.0339433	methionine adenosyltransferase II, alpha	Mat2a
39448	1455153_at	185.2	191.2	172.6	225.9	211.2	207	1.17322	0.230479	0.0161576	zinc finger protein 236	Zfp236
19611	1435305_at	608.7	602	555.7	712.2	661.3	698.6	1.17306	0.230282	0.010691	neurotrophic tyrosine kinase, receptor, type 2	Ntrk2
17753	1433447_x_at	1351.1	1168	1335.4	1482.5	1511.4	1526.4	1.17273	0.229875	0.0208465	chaperonin containing Tcp1, subunit 4 (delta)	Cct4
7973	1423667_at	1849.7	1829.3	1791.9	2086.3	2139.9	2189.6	1.17271	0.229851	0.000780565	methionine adenosyltransferase II, alpha	Mat2a
40609	1456314_x_at	971.7	1034.7	1045.4	1281.1	1203.1	1094.1	1.17252	0.229614	0.0407572	CDK2 (cyclin-dependent kinase 2)-associated protein 1	Cdk2ap1
39697	1455402_at	882.2	960.1	853.5	1039.7	1042.7	1078.4	1.17249	0.229576	0.0105455	suppressor of cytokine signaling 7	Socs7
37248	1452953_at	548.8	533.8	516.9	674	632	569.1	1.1723	0.229347	0.0447917	trans-golgi network vesicle protein 23B	Tvp23b
37224	1452929_at	634.9	609.7	588.2	717.7	706	724.6	1.17214	0.229146	0.00194168	CAP-GLY domain containing linker protein 1	Clip1
3716	1419385_a_at	251.9	292.2	284.8	314.1	326.1	331.2	1.17191	0.228867	0.0238116	ubiquilin 1	Ubqln1
39023	1454728_s_at	770.3	844	754	951.9	905.3	917.4	1.17156	0.228428	0.0119882	ATPase, aminophospholipid transporter (APLT), class I, type 8A, member 1	Atp8a1
32381	1448079_at	138	156.8	140.3	176.8	173.9	159	1.17145	0.228301	0.0371651	ring finger protein 166	Rnf166
36618	1452323_at	263.6	284.4	248.2	304.9	327.9	299.8	1.17131	0.228128	0.0286924	SPRY domain containing 3	Spryd3
619	1416288_at	2270.5	1987	1965.6	2428.7	2528.6	2322.6	1.16982	0.226285	0.0374043	DnaJ (Hsp40) homolog, subfamily A, member 1	Dnaja1
44887	1460595_at	156.8	162	175.7	194.2	201.6	182.6	1.16967	0.226097	0.0239735	synaptotagmin XIV	Syt14
13403	1429097_at	441.3	447	387.1	470	494.9	526.7	1.16952	0.225911	0.045786	ring finger protein 150	Rnf150
39026	1454731_at	176.6	152.1	150.6	185.8	184.7	189.9	1.16921	0.225528	0.034429	myosin X	Myo10
26039	1441733_s_at	132.9	140	125.3	155	157.5	153	1.16901	0.225288	0.00721508	nucleoporin 153	Nup153
1375	1417044_at	595.5	644.5	581.3	667.6	741.8	719.4	1.16884	0.225072	0.0245129	leucine carboxyl methyltransferase 1	Lcmt1
24508	1440202_at	54.3	54.7	51	64.3	65.9	56.8	1.16875	0.224966	0.0415368	RIKEN cDNA E430024I08 gene	E430024I08Rik
20656	1436350_at	1202	1390	1360.1	1562.4	1480.1	1575.2	1.16842	0.224555	0.0275938	family with sequence similarity 171, member B	Fam171b
19573	1435267_at	473.8	479.2	518.6	547.2	557.5	614.7	1.16839	0.22452	0.0309444
11356	1427050_at	364	356.3	383.2	406	442.1	440.3	1.16756	0.223494	0.0122779	thioredoxin domain containing 16	Txndc16
6400	1422094_a_at	236.5	267.4	253.8	290.2	309	285.4	1.16748	0.223398	0.0211212	zinc finger protein 329	Zfp329
33150	1448850_a_at	785.9	740	677.4	877.1	834.7	859.7	1.16711	0.222944	0.0220669	DnaJ (Hsp40) homolog, subfamily C, member 5	Dnajc5
20461	1436155_at	355.9	308.7	321.6	392	358.6	400.4	1.16711	0.222936	0.0445686	nicotinamide nucleotide adenylyltransferase 2	Nmnat2
41704	1457409_at	395.3	373.6	368.5	439.6	461.5	426.2	1.16696	0.222755	0.00859989	fucosyltransferase 9	Fut9
19663	1435357_at	184	212.3	213.9	240.1	223.4	248.3	1.1665	0.22219	0.0496136	arginine/serine rich protein 1	Rsrp1
38963	1454668_at	324.7	349.9	348.2	427.5	372.7	392.8	1.16641	0.22207	0.0341783	ubiquitin protein ligase E3 component n-recognin 4	Ubr4
5144	1420838_at	745.3	713.5	780.4	903.4	893.4	814.6	1.16622	0.22184	0.0219689	neurotrophic tyrosine kinase, receptor, type 2	Ntrk2
35575	1451280_at	3534.6	3564	3336.6	4233.6	4186.1	3748	1.16602	0.221598	0.027481	cyclic AMP-regulated phosphoprotein, 21	Arpp21
5182	1420876_a_at	117.4	113.5	120.5	131.6	137.8	140.3	1.16591	0.221454	0.00408714	septin 6	Sept6
18388	1434082_at	2511.6	2396.2	2456.8	2705.2	2738	3142.9	1.16586	0.221396	0.0480739	cyclin-dependent kinase 17	Cdk17
28393	1444087_at	52.3	49.8	55.4	60.8	62.9	59.9	1.16571	0.221214	0.00924644	PRP38 pre-mRNA processing factor 38 (yeast) domain containing A	Prpf38a
18718	1434412_x_at	404	403.7	423.6	491.1	453.6	490.3	1.16543	0.220868	0.00836451	STIP1 homology and U-Box containing protein 1	Stub1
12418	1428112_at	673.5	583.5	572.3	706.9	734.9	689.9	1.16531	0.220713	0.0435815	mesencephalic astrocyte-derived neurotrophic factor	Manf
5629	1421323_a_at	1480.1	1425.7	1558.2	1687.6	1680.9	1827.9	1.16407	0.219175	0.0164923	GTPase activating protein (SH3 domain) binding protein 2	G3bp2
42193	1457898_at	749.7	848.3	775.5	901.2	979.2	882.3	1.16398	0.219063	0.0362098
36384	1452089_at	504.4	454.6	488.3	596.2	563.6	523.9	1.16334	0.218271	0.0367389	calcium channel, voltage-dependent, beta 4 subunit	Cacnb4
32984	1448684_at	2637.4	2768.5	2678.6	2985.8	3208.9	3210	1.1633	0.218223	0.00634499	protein phosphatase 1, regulatory (inhibitor) subunit 2	Ppp1r2
19134	1434828_at	1157.2	1231.4	1083.6	1367.7	1338.9	1331.8	1.16307	0.217934	0.0128071	family with sequence similarity 102, member B	Fam102b
18750	1434444_s_at	294.4	324.5	289.8	364.2	367.5	325.1	1.16298	0.217826	0.0472385	anaphase promoting complex subunit 1	Anapc1
1192	1416861_at	411.6	353.3	419.6	471.6	449.5	455.8	1.16243	0.217146	0.0429038	signal transducing adaptor molecule (SH3 domain and ITAM motif) 1	Stam
23711	1439405_x_at	1541.9	1498.3	1410.5	1659.5	1792.6	1719.6	1.162	0.216606	0.0116278	cyclin N-terminal domain containing 1	Cntd1
3469	1419138_at	63.1	61.6	58.5	77.3	67.6	67.8	1.16103	0.215401	0.0473698	UDP-Gal:betaGlcNAc beta 1,3-galactosyltransferase, polypeptide 4	B3galt4
35559	1451264_at	132.9	137.5	128	157.3	145.9	159.2	1.16064	0.214924	0.0127833	FERM domain containing 6	Frmd6
38931	1454636_at	609.3	630.2	594	730.2	669.1	728.7	1.16062	0.214898	0.0123888	chromobox 5	Cbx5
21499	1437193_s_at	388.8	372.4	345.3	446.3	415.4	422.3	1.16042	0.214642	0.0198975	small nuclear ribonucleoprotein B	Snrpb
9262	1424956_at	72.5	72	81.2	87.7	84.6	89.6	1.16039	0.21461	0.0221421	AT hook, DNA binding motif, containing 1	Ahdc1
4233	1419914_s_at	1201.8	1206.4	1201.7	1419.4	1425.7	1343.1	1.1602	0.214371	0.00192212	nuclear undecaprenyl pyrophosphate synthase 1 homolog (S. cerevisiae)	Nus1
35731	1451436_at	261	280.9	291.7	326.4	322.9	317.6	1.15991	0.214011	0.0089494	sno, strawberry notch homolog 1 (Drosophila)	Sbno1
12676	1428370_at	628.7	691.1	713.1	732.9	799.3	825.4	1.15972	0.21378	0.0443098	RIKEN cDNA 1500011B03 gene	1500011B03Rik
18690	1434384_at	375.1	341.4	327.7	402.1	423.8	385	1.15964	0.213682	0.0367447	nuclear receptor interacting protein 1	Nrip1
22523	1438217_at	647.7	616.3	679.2	733.5	811	706.9	1.1586	0.212388	0.0466719	RNA binding protein, fox-1 homolog (C. elegans) 1	Rbfox1
11539	1427233_at	470.3	500.6	470.1	586.9	537.1	545.2	1.15836	0.212086	0.0146012	teashirt zinc finger family member 1	Tshz1
32712	1448412_a_at	595.2	598.6	515	634	663.1	680.6	1.15736	0.21084	0.042487	TSC22 domain family, member 4	Tsc22d4
4709	1420403_at	684	729.6	656.3	839.2	785.5	770.3	1.15706	0.210465	0.0222482	ATPase, Ca++ transporting, plasma membrane 2	Atp2b2
4069	1419738_a_at	65.3	66.9	68.5	76.7	83.9	71.6	1.15695	0.210327	0.0464447	tropomyosin 2, beta	Tpm2
19130	1434824_at	491.4	436.9	478.4	517.9	567.7	541.5	1.15668	0.209988	0.0281997	bromodomain adjacent to zinc finger domain, 1B	Baz1b
967	1416636_at	2554.1	2332	2417.2	3007.9	2721.3	2717.2	1.15652	0.209788	0.0303225	Ras homolog enriched in brain	Rheb
37435	1453140_at	460.3	472.9	503.9	545.6	591	525.4	1.1565	0.20976	0.0324664	zinc finger protein 871	Zfp871
672	1416341_at	336.9	369.1	310.9	380	392.6	403.3	1.15636	0.209588	0.0430963	polymerase (RNA) II (DNA directed) polypeptide C	Polr2c
35243	1450948_a_at	64.8	58.7	61	67.4	71.9	74	1.1561	0.209263	0.0219527	mitochondrial ribosomal protein L1	Mrpl1
37310	1453015_at	957.8	1055.8	1009.3	1211.7	1087.9	1195.1	1.15608	0.209235	0.0306504	c-Maf inducing protein	Cmip
39799	1455504_a_at	265.6	303.2	259.4	322.1	313.3	321.9	1.15588	0.208992	0.0370615	makorin, ring finger protein, 1	Mkrn1
41845	1457550_at	185.3	180.1	188.4	220.3	203	216.8	1.15583	0.208932	0.00775236	RIKEN cDNA 9530059O14 gene	9530059O14Rik
39268	1454973_at	287.7	285.4	318.4	350.6	338	341.6	1.15558	0.208618	0.0148602	activating transcription factor 7 interacting protein	Atf7ip
1077	1416746_at	350.2	315.8	308.2	390	364.7	370.8	1.15531	0.208276	0.0282581	H2A histone family, member X	H2afx
21413	1437107_at	193.8	205	182.7	236.3	209.8	225.6	1.15512	0.208038	0.0400829	RAB6B, member RAS oncogene family	Rab6b
23717	1439411_a_at	633.3	608.3	575.5	678.1	693.2	727.6	1.15508	0.207996	0.013439	exportin 7	Xpo7
6755	1422449_s_at	1531.9	1535.7	1574.5	1811	1764.2	1785.9	1.15489	0.207751	0.000236222	reticulocalbin 2	Rcn2
35975	1451680_at	189.3	184.1	201.4	207.8	226.8	229.1	1.15466	0.207471	0.0249696	sulfiredoxin 1 homolog (S. cerevisiae)	Srxn1
6914	1422608_at	2046.9	1974.2	2097.4	2382.5	2494.8	2184.8	1.15422	0.206919	0.0320109	cAMP-regulated phosphoprotein 19	Arpp19
19058	1434752_at	138.1	124.3	134.8	158.7	151	148.7	1.15408	0.206741	0.0165894	zinc finger protein 207	Zfp207
21142	1436836_x_at	1297.8	1191.3	1280.2	1437.5	1537.3	1367.8	1.1521	0.204262	0.0320506	calponin 3, acidic	Cnn3
38902	1454607_s_at	782.9	813.7	841.9	912.7	986.2	908.9	1.15145	0.203446	0.0154561	phosphoserine aminotransferase 1	Psat1
15075	1430769_s_at	193.2	191.9	197.1	236.6	203.3	230.4	1.15132	0.203292	0.0469047	family with sequence similarity 122, member A	Fam122a
10888	1426582_at	547.7	599.4	615.8	683.6	676	669.8	1.15117	0.203103	0.0131639	activating transcription factor 2	Atf2
11391	1427085_at	144.4	128.9	141.8	153.4	166.5	157.4	1.14984	0.201437	0.0282057	ribonuclease P/MRP 25 subunit-like	Rpp25l
8426	1424120_at	204.2	201.1	229.7	248.2	242.8	239.1	1.14976	0.201337	0.0283405	ring finger protein 8	Rnf8
12776	1428470_at	207.8	185.8	207.1	222.9	238.1	229.6	1.14966	0.201206	0.0239097	exocyst complex component 2	Exoc2
1131	1416800_at	180.2	167.4	161.7	197.6	199.9	187.8	1.14922	0.200661	0.0185717	transient receptor potential cation channel, subfamily M, member 7	Trpm7
18728	1434422_at	228.5	209.1	220.8	258.2	252	246.4	1.14915	0.200566	0.00766498	RIKEN cDNA 1700066M21 gene	1700066M21Rik
19434	1435128_at	607.7	531.9	570.9	620.2	677.4	667.8	1.14902	0.200405	0.0391738	brain-specific angiogenesis inhibitor 1-associated protein 2	Baiap2
7042	1422736_at	309.1	302	331.9	348	375.2	360.2	1.14889	0.200236	0.0173847	RAN binding protein 9	Ranbp9
19493	1435187_at	1318.6	1500.3	1404.8	1625.9	1594.2	1631.3	1.14861	0.199894	0.0176348	translocase of outer mitochondrial membrane 20 homolog (yeast)	Tomm20
39058	1454763_at	176.5	182	162.5	194	213.4	191	1.14856	0.199827	0.0472358	ankyrin repeat domain 17	Ankrd17
9571	1425265_a_at	529.5	576	528.2	663	589.1	623.9	1.14831	0.199517	0.0381522	exoribonuclease 3	Eri3
44516	1460223_a_at	1231.6	1246.9	1194.7	1448.4	1371.7	1397.2	1.14813	0.199282	0.00268697	dematin actin binding protein	Dmtn
22960	1438654_x_at	927.6	855.4	976.4	1077.2	1034.5	1055	1.1476	0.198626	0.0218665	monocyte to macrophage differentiation-associated 2	Mmd2
36103	1451808_at	234.6	248.7	235.7	297.2	267.6	260.2	1.14743	0.198402	0.0440431	potassium inwardly-rectifying channel, subfamily J, member 4	Kcnj4
769	1416438_at	655.3	665.6	605.6	777.2	713.8	716.8	1.14602	0.196627	0.0277859	poly-U binding splicing factor 60	Puf60
28349	1444043_at	35.8	38.9	41.2	42.5	45.6	44.7	1.14582	0.196375	0.0361111
26154	1441848_at	93	89.5	98.3	113.8	101	106.9	1.14566	0.196173	0.0387219
33353	1449053_s_at	167	154.8	148.7	181	180.5	177.5	1.14559	0.196091	0.0141522	component of oligomeric golgi complex 1 /// conserved oligomeric Golgi complex subunit 1-like	Cog1
35244	1450949_at	121.5	121.1	118.5	141.5	140.6	131.2	1.14456	0.194791	0.00708099	katanin p60 (ATPase-containing) subunit A1	Katna1
18235	1433929_at	213.3	192.1	185.5	229.9	231.7	214.7	1.14453	0.194749	0.0461475	NHL repeat containing 2	Nhlrc2
13168	1428862_at	202	182.7	208.5	227.3	214.3	236.7	1.14346	0.193405	0.0485118	tetratricopeptide repeat domain 17	Ttc17
8700	1424394_at	710.8	698.6	702.2	818.1	838.7	757.6	1.1434	0.193328	0.0148276	selenoprotein M	Selm
37401	1453106_a_at	296	299.1	311.3	359.7	358.1	318.4	1.1432	0.193083	0.0388849	RNA (guanine-7-) methyltransferase	Rnmt
11395	1427089_at	254	273.5	278.7	297.4	311.3	312.9	1.14314	0.193003	0.0128392	cyclin T2	Ccnt2
19154	1434848_at	764.4	766.1	749.9	847.8	885.5	873.4	1.14309	0.192938	0.000887326
2199	1417868_a_at	750.2	735.6	798.4	921.2	856.7	832.9	1.14298	0.192803	0.0285554	cathepsin Z	Ctsz
2884	1418553_at	259.1	238	230.5	274.2	270.4	286.3	1.14197	0.191529	0.0246901	rho/rac guanine nucleotide exchange factor (GEF) 18	Arhgef18
13419	1429113_at	393.1	410	401.2	476.7	427	471.3	1.14174	0.191237	0.0260059	PAXIP1 associated glutamate rich protein 1A /// proline-rich transmembrane protein 2	Pagr1a
4916	1420610_at	633.3	569.8	571.6	684.2	707.6	633.8	1.14138	0.190774	0.0501915	protein kinase, cAMP dependent, catalytic, beta	Prkacb
10532	1426226_at	107.9	117.5	119.6	134.3	131.3	128.1	1.14116	0.1905	0.0156506	dual-specificity tyrosine-(Y)-phosphorylation regulated kinase 1a	Dyrk1a
17800	1433494_at	247.7	259.6	238.2	299.3	270.1	280.8	1.14044	0.189594	0.029611	downstream of Stk11	Dos
8695	1424389_at	281.1	304.1	295.9	312.7	356.8	335.2	1.14028	0.189387	0.0458855	nucleoporin like 1	Nupl1
20486	1436180_at	933.6	955.4	982.7	1080.2	1083.6	1110.3	1.14013	0.189193	0.00142591	DnaJ (Hsp40) homolog, subfamily C, member 5	Dnajc5
20890	1436584_at	609.6	578.5	602.1	724.9	671.6	644.1	1.13987	0.188873	0.0307033	sprouty homolog 2 (Drosophila)	Spry2
19947	1435641_at	207.5	203.2	211.5	237.6	249	222.3	1.13934	0.188204	0.0233988	mannoside acetylglucosaminyltransferase 4, isoenzyme A	Mgat4a
1542	1417211_a_at	298.8	318.5	291.2	331.3	358.2	345.5	1.13924	0.188072	0.0199728	RIKEN cDNA 1110032A03 gene	1110032A03Rik
11260	1426954_at	399	367.8	367.7	441.2	414.9	435.7	1.13865	0.187326	0.0162587	tripartite motif-containing 33	Trim33
30592	1446286_at	432.8	436.2	442.8	520.8	509.2	462.8	1.13798	0.186473	0.0283268
18448	1434142_at	145.9	164.1	164.7	175.1	182	183	1.13777	0.18621	0.0305558	protein phosphatase 1D magnesium-dependent, delta isoform	Ppm1d
6060	1421754_at	755.2	787.8	769	837.5	876.9	916	1.13772	0.186141	0.0124193	cDNA sequence AY036118	AY036118
700	1416369_at	347.2	321.5	338.2	359.4	393.4	392.5	1.13745	0.185805	0.0267482	hippocampus abundant transcript-like 1	Hiatl1
8788	1424482_at	277	255.4	250.5	287.1	290.2	312.8	1.13693	0.185139	0.0358127	Rho guanine nucleotide exchange factor (GEF7)	Arhgef7
21464	1437158_at	334.6	334	346.9	391.8	382.3	380.1	1.13658	0.184703	0.00111757	Nipped-B homolog (Drosophila)	Nipbl
11142	1426836_s_at	708.3	685.7	726.3	767.2	860.9	780.8	1.13611	0.184106	0.0378914	methionyl aminopeptidase 1	Metap1
20832	1436526_at	253.6	261.2	235.2	276.3	283	292.7	1.136	0.183963	0.0199598	N-acetylglucosamine-1-phosphotransferase, gamma subunit	Gnptg
484	1416153_at	1237.2	1134.6	1131	1346.4	1316.3	1316.2	1.13592	0.183861	0.0118796	signal recognition particle 54A /// signal recognition particle 54B /// signal recognition particle 54C	Srp54a
10493	1426187_a_at	528.9	558.1	502.1	590.4	618.9	595.6	1.1358	0.183709	0.0173787	HCLS1 associated X-1	Hax1
19634	1435328_at	300.8	310.3	287.2	354.8	320.3	345	1.13559	0.183441	0.0296049	cysteine and histidine rich 1	Cyhr1
7680	1423374_at	414.2	422.3	425.4	447.2	476.6	508.8	1.13527	0.183038	0.0347206	nuclear receptor coactivator 6	Ncoa6
7438	1423132_a_at	376.7	432.1	436	463.4	468.3	480.3	1.13432	0.181826	0.048059	NSA2 ribosome biogenesis homolog (S. cerevisiae)	Nsa2
37390	1453095_at	1055	955.5	1063.9	1126.9	1137.3	1221	1.13362	0.180937	0.0402528	RAB10, member RAS oncogene family	Rab10
39786	1455491_at	551.1	539.7	523.8	613.2	622.7	593.4	1.13297	0.180115	0.00363025	heterogeneous nuclear ribonucleoprotein H3	Hnrnph3
35232	1450937_at	540.8	603.9	540.2	628.6	634.1	645.9	1.13277	0.179852	0.026543	lin-7 homolog C (C. elegans)	Lin7c
32597	1448297_a_at	697.1	727.5	693.3	813.3	761.7	823.7	1.13258	0.179618	0.0131384	tyrosine kinase, non-receptor, 2	Tnk2
11336	1427030_at	120.9	123	124.6	139.5	133.8	144	1.13243	0.17942	0.00660202	spindle and centriole associated protein 1	Spice1
35479	1451184_at	677.8	738.3	724.1	797.7	847.1	777.7	1.1319	0.178751	0.0268892	heterogeneous nuclear ribonucleoprotein A3 pseudogene /// heterogeneous nuclear ribonucleoprotein A3	Gm6793
23082	1438776_x_at	1532.3	1460.6	1578.8	1720	1668.5	1785.2	1.13168	0.178466	0.0140961	predicted gene 14586 /// ribosomal protein S17	Gm14586
44607	1460315_s_at	724.1	748.9	749.3	804.6	854.2	855.8	1.13153	0.178275	0.00654362	TANK-binding kinase 1	Tbk1
7400	1423094_at	456.6	484.2	494.7	526	550.5	547	1.13096	0.177554	0.0102213	cereblon	Crbn
38077	1453782_at	228.6	235.8	227.4	247.9	259.4	274.2	1.12966	0.175891	0.0205876	ankyrin repeat domain 33B	Ankrd33b
16400	1432094_a_at	460.4	472.8	448.9	519.1	497.2	544.9	1.12959	0.175793	0.0179538	coiled-coil domain containing 132	Ccdc132
18926	1434620_s_at	501.2	546	503	561.2	605.1	584.7	1.12953	0.175725	0.0259318	family with sequence similarity 13, member B	Fam13b
32602	1448302_at	135.5	133	137.6	148	152.1	158.6	1.12952	0.175716	0.00643669	potassium channel tetramerisation domain containing 20	Kctd20
39257	1454962_at	307.6	297.7	315.5	336.4	337	366.3	1.12913	0.175208	0.0235717	spire homolog 1 (Drosophila)	Spire1
7201	1422895_at	984.6	930.5	936.3	1050.5	1073.5	1095.1	1.12895	0.174987	0.00463615	vesicle-associated membrane protein 4	Vamp4
41059	1456764_at	298.6	303	314.3	350.6	351.4	332	1.12894	0.174974	0.00749864	solute carrier family 35, member F3	Slc35f3
39924	1455629_at	1466.6	1428.1	1435.3	1703.2	1658.7	1525.4	1.12871	0.174671	0.02739	dopamine receptor D1A	Drd1a
22374	1438068_at	432.9	497.7	469.4	537.4	521.7	520.9	1.12857	0.174498	0.0370996
35404	1451109_a_at	1191.8	1263.7	1207.9	1306	1383.3	1444.3	1.12835	0.174216	0.0262932	neural precursor cell expressed, developmentally down-regulated 4	Nedd4
18414	1434108_at	509.3	550.3	574.5	624	601.1	617.8	1.12778	0.173482	0.0262432	F-box protein 11	Fbxo11
18110	1433804_at	101.5	115.3	106.7	122.1	123.1	119.4	1.12705	0.172549	0.03041	Janus kinase 1	Jak1
6155	1421849_at	620	578.5	645.6	713.1	655.8	709.3	1.12695	0.172418	0.0441535	stromal antigen 2	Stag2
12889	1428583_at	345.7	355.2	341.6	395.1	391.8	386.6	1.12566	0.17077	0.000763311	nuclear fragile X mental retardation protein interacting protein 2	Nufip2
8405	1424099_at	42.3	39.4	38.7	42.7	46.8	46	1.12542	0.170457	0.0393958	glutathione peroxidase 8 (putative)	Gpx8
32985	1448685_at	1455.2	1476.3	1346.3	1591.7	1547.1	1674.6	1.1252	0.170187	0.0313794	ubiquinol-cytochrome c reductase complex assembly factor 2	Uqcc2
40733	1456438_x_at	1522.1	1468.3	1457	1593.7	1652.5	1756.9	1.12495	0.16986	0.0232158	ribophorin I	Rpn1
36527	1452232_at	153.2	154.3	147.8	164.7	179	168.4	1.12475	0.169608	0.0161221	UDP-N-acetyl-alpha-D-galactosamine: polypeptide N-acetylgalactosaminyltransferase 7	Galnt7
35587	1451292_at	130	124	136.4	148.9	147	143.2	1.12474	0.169596	0.0147723	Zinc finger protein 212	Zfp212
19530	1435224_at	447.1	420.9	424.5	504.2	480.6	468.8	1.12464	0.169466	0.0154347	CREB binding protein	Crebbp
7923	1423617_at	215.9	230.8	222.4	258.5	238.6	255.3	1.1245	0.169278	0.0210435	peptide deformylase (mitochondrial)	Pdf
2509	1418178_at	716.9	673.8	629.6	740.4	757.5	773.5	1.12429	0.169012	0.0360327	internexin neuronal intermediate filament protein, alpha	Ina
18012	1433706_a_at	1964	1914.4	1843.9	2119.7	2064	2249.4	1.12422	0.168919	0.0219126	protein tyrosine phosphatase-like A domain containing 1	Ptplad1
9106	1424800_at	1359.7	1513.1	1409.5	1651	1548.2	1612.8	1.1237	0.168251	0.0312097	enabled homolog (Drosophila)	Enah
11053	1426747_at	237.7	262.7	234.8	277	281.6	267.4	1.1235	0.168005	0.0365683	ATP-binding cassette, sub-family F (GCN20), member 3	Abcf3
824	1416493_at	581.1	536.2	545	659.8	605.4	602.4	1.1235	0.168005	0.0418	dolichyl-di-phosphooligosaccharide-protein glycotransferase	Ddost
23411	1439105_at	107.2	121.9	112.6	127.2	127.1	129.4	1.12291	0.167249	0.0325151	cytidine and dCMP deaminase domain containing 1	Cdadc1
7482	1423176_at	546.4	582.6	573.3	643.1	640.7	626.9	1.12242	0.166616	0.00438568	transducer of ErbB-2.1	Tob1
1673	1417342_at	91.4	86.6	92.4	99.3	101.7	102.4	1.12204	0.166126	0.00553531	protein phosphatase 1, regulatory (inhibitor) subunit 2	Ppp1r2
37173	1452878_at	1300.5	1271.2	1250.9	1433.1	1355.4	1497.1	1.12112	0.164943	0.0237126	protein kinase C, epsilon	Prkce
39315	1455020_at	265.4	264.3	254.5	300.2	273.2	305.5	1.12076	0.164477	0.0406405	sorting nexin 25	Snx25
37877	1453582_at	194.8	179.6	198.2	212.9	206	222.8	1.12068	0.164371	0.0374685	choline kinase alpha	Chka
17781	1433475_a_at	1408.4	1401.9	1531.2	1619.2	1690.7	1552.9	1.12007	0.163594	0.0398908	expressed sequence C78339	C78339
12036	1427730_a_at	184.3	171.9	195.7	206.2	207.3	204.4	1.11959	0.162966	0.0336242	zinc finger protein 148	Zfp148
44532	1460239_at	1063.4	1043.4	944.9	1101.1	1149.3	1164.1	1.11888	0.162061	0.042797	tetraspanin 13	Tspan13
35361	1451066_at	459.6	506.5	490.4	533.8	549.5	545.7	1.11843	0.161481	0.0167867	membrane bound O-acyltransferase domain containing 7	Mboat7
18193	1433887_at	255	268.6	260	281.2	282.7	312.2	1.11804	0.160978	0.0467328	DnaJ (Hsp40) homolog, subfamily C, member 3	Dnajc3
44515	1460222_at	57	56.7	60.1	64.6	66.6	62.9	1.1168	0.159372	0.011349	SH3-domain binding protein 1	Sh3bp1
32583	1448283_a_at	962.6	933.6	949	1095.5	1088	990.7	1.11563	0.157863	0.0344001	ubiquitin-like modifier activating enzyme 2	Uba2
2519	1418188_a_at	3250.6	3042.7	3233.1	3745.3	3383	3499	1.11556	0.157772	0.0434372	metastasis associated lung adenocarcinoma transcript 1 (non-coding RNA)	Malat1
21314	1437008_x_at	399.8	427	410.9	468	449.8	462.5	1.11521	0.15732	0.00763968	transmembrane protein 109	Tmem109
5742	1421436_at	92	89.5	93.5	102.4	98.5	105.6	1.11455	0.156455	0.0112748	glutamate receptor, ionotropic, delta 2	Grid2
5156	1420850_at	155.5	151.8	166.3	170.6	184.2	173	1.11444	0.156322	0.040298	Crn, crooked neck-like 1 (Drosophila)	Crnkl1
19278	1434972_x_at	1356.3	1435.9	1543.2	1590.9	1649.1	1587.9	1.1136	0.155231	0.0466177	serine/arginine-rich splicing factor 1-like /// serine/arginine-rich splicing factor 1	LOC102641923
8455	1424149_at	136.4	127	123.1	150	141.5	138.9	1.11358	0.15521	0.0475446	non-SMC element 2 homolog (MMS21, S. cerevisiae)	Nsmce2
11000	1426694_at	200.5	209.4	207.2	227	227.3	232.5	1.11295	0.154386	0.0019503	RIKEN cDNA 9030624J02 gene	9030624J02Rik
158	1415827_a_at	394.2	377.4	397.5	430.6	420.9	449.2	1.11257	0.15389	0.0133967	stress-associated endoplasmic reticulum protein 1	Serp1
2080	1417749_a_at	684.8	664.6	675.2	802.4	732.2	717.7	1.11247	0.153762	0.0472271	tight junction protein 1	Tjp1
203	1415872_at	2644.3	2477.6	2350.5	2760.7	2770.3	2780.1	1.11224	0.153468	0.0305224	heterogeneous nuclear ribonucleoprotein H1	Hnrnph1
11854	1427548_a_at	339.1	329.8	320.1	365.1	353.4	381.3	1.11203	0.153199	0.0194527	chloride channel, nucleotide-sensitive, 1A	Clns1a
6324	1422018_at	682.8	718.8	629.3	756.4	758.1	743.8	1.11197	0.153118	0.0453574	human immunodeficiency virus type I enhancer binding protein 2	Hivep2
39829	1455534_s_at	212.9	199.3	205.2	231.7	215.1	239.4	1.11144	0.152424	0.0486322	oxysterol binding protein-like 11	Osbpl11
1939	1417608_a_at	3159.9	3431.2	3232.2	3658	3645.8	3607.1	1.11072	0.15149	0.0117685	ribosomal protein L13A	Rpl13a
1889	1417558_at	526	519.6	510.4	575.6	602	550.5	1.1106	0.151345	0.0210006	Fyn proto-oncogene	Fyn
221	1415890_at	623.8	591.7	588.3	644.9	690	667.6	1.11016	0.150763	0.0184495	3'-phosphoadenosine 5'-phosphosulfate synthase 1	Papss1
11069	1426763_at	973	940.9	885.6	1023.4	1015.9	1067.7	1.10984	0.150353	0.0274603	ornithine decarboxylase antizyme 2	Oaz2
11190	1426884_at	742.9	761.7	709.1	786.7	826.2	843.9	1.10982	0.150321	0.0239172	required for meiotic nuclear division 5 homolog A (S. cerevisiae)	Rmnd5a
12767	1428461_at	332.4	321.1	329.2	352	383.4	355.2	1.1098	0.150299	0.0268692	protein phosphatase 2, regulatory subunit B', epsilon	Ppp2r5e
8264	1423958_a_at	424.8	462.9	453.2	506.3	477.8	503.8	1.10963	0.150076	0.0285197	tetratricopeptide repeat domain 33	Ttc33
21257	1436951_x_at	602.8	572.7	573.5	636	666.2	638.4	1.10955	0.149972	0.0099607	thioredoxin domain containing 9	Txndc9
7738	1423432_at	310.8	339.8	300.8	353.3	348.8	353.4	1.10942	0.149803	0.0422888	pleckstrin homology domain interacting protein	Phip
8150	1423844_s_at	87.9	85.5	90.3	98.3	92.5	101.7	1.10922	0.149539	0.0336459	cystathionine beta-synthase	Cbs
8847	1424541_at	517	507.7	536.9	557.9	586.3	587.2	1.10873	0.148914	0.0118426	transmembrane protein 70	Tmem70
39089	1454794_at	350.8	373.1	374.5	408.7	409	400	1.10861	0.148755	0.00843162	spastin	Spast
12091	1427785_x_at	389.5	390.8	388.8	417.9	431.5	446.6	1.10855	0.148667	0.00702851	calpain 15	Capn15
1997	1417666_at	319.1	352.6	330.1	381.9	366	362.5	1.1084	0.148485	0.0348156	deoxynucleotidyltransferase, terminal, interacting protein 1	Dnttip1
17011	1432705_at	153.2	159.2	151.8	176.7	161	176.7	1.10814	0.148144	0.042666	RIKEN cDNA 5330428N10 gene	5330428N10Rik
38993	1454698_at	1052.4	1082	967.1	1109.8	1145.2	1181.5	1.10801	0.147974	0.0498765	protein tyrosine phosphatase-like A domain containing 1	Ptplad1
15400	1431094_at	500.5	510.5	528.9	548.3	599.1	558.7	1.10793	0.147866	0.0344994	RIKEN cDNA 1110006E14 gene	1110006E14Rik
34331	1450036_at	369.3	351.3	349.7	380.8	418.1	386.5	1.10754	0.147359	0.0437623	serum/glucocorticoid regulated kinase 3	Sgk3
34970	1450675_at	579.6	595.6	633.7	672.2	670.8	659.4	1.10697	0.146618	0.0175815	small ArfGAP 2	Smap2
22736	1438430_at	288.9	309.4	326.2	340.9	344.3	337.3	1.106	0.145356	0.0408593	high mobility group box transcription factor 1	Hbp1
10755	1426449_a_at	743.8	790.7	747.9	816	836.6	869.6	1.10506	0.144131	0.0209709	praja ring finger 1, E3 ubiquitin protein ligase	Pja1
39017	1454722_at	1233.4	1277.1	1182.7	1337.8	1375.5	1367.4	1.10492	0.143945	0.0120057	phosphatase and tensin homolog	Pten
39684	1455389_s_at	587.3	582	613.8	682.9	665.3	621.7	1.10476	0.143735	0.0395116	argonaute RISC catalytic subunit 2	Ago2
2605	1418274_at	406.4	396.7	411.6	446.8	451.5	443	1.10422	0.143032	0.00108824	predicted gene 10349 /// predicted pseudogene 9386 /// nuclear transport factor 2 /// nuclear transport factor 2, pseudogene 1	Gm10349
18252	1433946_at	219.3	201.8	222.3	236.9	237.8	235.2	1.10336	0.1419	0.0262137	zinc finger protein interacting with K protein 1	Zik1
35245	1450950_at	283.6	277.3	257.7	304	301.3	297.8	1.10323	0.141727	0.0244532	structural maintenance of chromosomes 3	Smc3
39434	1455139_at	446.9	478.9	492.5	508.8	518.4	536.9	1.1028	0.14117	0.0373101	SWI/SNF related matrix associated, actin dependent regulator of chromatin, subfamily a-like 1	Smarcal1
34730	1450435_at	995	994.7	1058.1	1167.6	1082.9	1109.2	1.10234	0.140564	0.0336347	L1 cell adhesion molecule	L1cam
10652	1426346_at	668.5	643.9	688.9	703.9	742.5	757.9	1.10143	0.139383	0.0306767	prolyl endopeptidase-like	Prepl
426	1416095_x_at	581.3	536.3	580.8	616.2	618.8	635.6	1.10139	0.139325	0.0235169	SAP domain containing ribonucleoprotein	Sarnp
36339	1452044_at	1081.8	1123.1	1061.3	1185	1185.3	1226.7	1.10128	0.139181	0.00848778	actin related protein 2/3 complex, subunit 5-like	Arpc5l
24414	1440108_at	473.4	490.1	502.1	556.1	543.3	514.4	1.10112	0.13897	0.0293707	forkhead box P2	Foxp2
17834	1433528_at	344.5	333.8	363.3	387.6	364.6	394.4	1.10081	0.138561	0.0485382	general transcription factor II A, 2 /// transcription initiation factor IIA subunit 2-like	Gtf2a2
14817	1430511_at	59.8	62.4	62.7	68	67.9	67.1	1.09789	0.134735	0.00332167	unc-13 homolog C (C. elegans)	Unc13c
40289	1455994_x_at	178.8	200	192.6	205.2	209.1	213	1.09783	0.134655	0.04783	elongation of very long chain fatty acids (FEN1/Elo2, SUR4/Elo3, yeast)-like 1	Elovl1
44330	1460037_at	828.3	762.5	781.7	878.4	884.5	840.1	1.09715	0.133767	0.0327476	family with sequence similarity 98, member B	Fam98b
6777	1422471_at	402.2	374.1	367.8	424.9	412.8	417.2	1.09684	0.133359	0.029586	peroxisomal biogenesis factor 13	Pex13
34303	1450008_a_at	868.5	804.3	824.8	955.5	897.6	885.4	1.09645	0.132843	0.049106	catenin (cadherin associated protein), beta 1	Ctnnb1
18757	1434451_at	1098.3	1058.4	1017.7	1189.6	1181	1108.5	1.09599	0.13223	0.0428807	ataxin 1	Atxn1
106	1415775_at	2262.5	2133.3	2093.3	2311.4	2320	2479.9	1.09588	0.132095	0.0503638	retinoblastoma binding protein 7	Rbbp7
28762	1444456_at	102.7	95.2	97.9	110.6	107.3	106.2	1.09567	0.131817	0.0211348	RIKEN cDNA 9030425P06 gene	9030425P06Rik
12812	1428506_at	209.2	203.9	206.7	214.7	232.5	231.8	1.09551	0.131609	0.0305298	5-aminoimidazole-4-carboxamide ribonucleotide formyltransferase/IMP cyclohydrolase	Atic
32848	1448548_at	890.6	885	926.2	991.3	955.2	1011.6	1.09486	0.13075	0.0150986	predicted gene 2808 /// tubby like protein 4	Gm2808
355	1416024_x_at	1194.1	1149.1	1198.8	1268.4	1362.5	1245.6	1.09444	0.13019	0.0464122	chaperonin containing Tcp1, subunit 3 (gamma)	Cct3
32562	1448262_at	574.6	559.9	568.6	586.6	626.6	650.6	1.09436	0.130084	0.0489374	proteasome (prosome, macropain) subunit, beta type 2	Psmb2
18490	1434184_s_at	411.3	375.1	379.8	416.7	428.5	428.9	1.09252	0.127663	0.0405322	mitogen-activated protein kinase kinase kinase kinase 4	Map4k4
19654	1435348_at	119.9	131.3	122.2	138.8	132.7	136.4	1.09239	0.127494	0.0422346	lysine (K)-specific demethylase 5C	Kdm5c
529	1416198_at	185.7	194.4	202.1	206.8	211.4	217.7	1.09224	0.127285	0.0347261	negative elongation factor complex member C/D, Th1l	Nelfcd
19274	1434968_a_at	2373.3	2359.1	2314.7	2637.5	2614.6	2441.8	1.09178	0.126685	0.0284104	ARP3 actin-related protein 3	Actr3
21803	1437497_a_at	3152	3120.7	3216	3434.8	3498.1	3422.8	1.09137	0.126143	0.00137672	heat shock protein 90, alpha (cytosolic), class A member 1	Hsp90aa1
1574	1417243_at	364.4	351.2	357.7	385	391.9	394.2	1.09112	0.125811	0.00228255	family with sequence similarity 192, member A	Fam192a
2895	1418564_s_at	1161.7	1154.5	1203.4	1271.7	1318.8	1249.2	1.09095	0.125582	0.0139625	serpine1 mRNA binding protein 1	Serbp1
1497	1417166_at	624.3	590.2	599.6	653	678.6	646.3	1.09029	0.124716	0.0181746	PC4 and SFRS1 interacting protein 1	Psip1
20236	1435930_at	304.5	307.6	290	330.4	318.3	334.8	1.09023	0.124638	0.0208229	S phase cyclin A-associated protein in the ER	Scaper
801	1416470_a_at	461.7	457.9	448.7	477.9	521.8	491.7	1.08997	0.124283	0.0386169	ribophorin I	Rpn1
10132	1425826_a_at	367.4	340.9	338.9	387.1	380.6	373.7	1.08995	0.124267	0.0344945	sorbin and SH3 domain containing 1	Sorbs1
17876	1433570_s_at	247.4	264.5	254.4	274.2	277.5	283.4	1.08978	0.12404	0.0153236	N(alpha)-acetyltransferase 35, NatC auxiliary subunit	Naa35
20357	1436051_at	1214.2	1114.8	1146.9	1248	1256.2	1282.5	1.08942	0.123555	0.0290201	myosin VA	Myo5a
23249	1438943_x_at	1200.1	1174.8	1193.4	1264.4	1281.8	1339.1	1.08884	0.122789	0.0113381	ribophorin I	Rpn1
18230	1433924_at	2041.8	1992.1	2149.8	2250.9	2284.5	2183.9	1.08661	0.119841	0.031752	paternally expressed 3	Peg3
19010	1434704_at	752.2	740.8	755.1	843.8	826.5	772.1	1.08643	0.119593	0.0424391	lysine (K)-specific methyltransferase 2E	Kmt2e
10787	1426481_at	605.9	626.5	618.9	676.4	660.5	673.5	1.08594	0.118944	0.00238722	kelch-like 22	Klhl22
35073	1450778_a_at	360.8	344.8	352.7	394.3	388.8	365.8	1.08561	0.118505	0.0377314	phosphorylated adaptor for RNA export	Phax
9670	1425364_a_at	535.2	527.6	503.8	562.5	576.5	561.7	1.0856	0.118492	0.0135482	solute carrier family 3 (activators of dibasic and neutral amino acid transport), member 2	Slc3a2
33369	1449069_at	539.1	532.5	541.7	597	577.2	576.7	1.08529	0.118082	0.00315247	zinc finger protein 148	Zfp148
57	1415726_at	891.9	875.2	866.8	928.2	963.3	966.7	1.08516	0.117906	0.00646652	ankyrin repeat domain 17	Ankrd17
7413	1423107_at	1648.8	1558.2	1520.5	1662.2	1734	1732.8	1.08493	0.1176	0.0406172	ubiquitin-conjugating enzyme E2B	Ube2b
3589	1419258_at	733.6	720.2	715.9	774.6	808.5	770.5	1.08476	0.117374	0.00962503	transcription elongation factor A (SII) 1	Tcea1
12335	1428029_a_at	594.5	648.9	608.9	677.5	678.2	653.4	1.08465	0.117232	0.0453946	H2A histone family, member V	H2afv
32636	1448336_at	518.1	501.4	481.6	548.9	541.5	536.5	1.08381	0.116105	0.0197447	developmentally regulated GTP binding protein 1	Drg1
22233	1437927_at	895.7	944.9	919.2	1034.4	981.3	975.1	1.0837	0.115968	0.0309188	discs, large homolog 2 (Drosophila)	Dlg2
1986	1417655_a_at	408.4	392	400.3	418.7	449.1	432.5	1.08295	0.114969	0.0292172	serrate RNA effector molecule homolog (Arabidopsis)	Srrt
7151	1422845_at	557.6	589	588.8	630.7	629.1	619.4	1.08286	0.11485	0.0121399	calnexin	Canx
35185	1450890_a_at	923	931.7	935.3	994.4	999.4	1026.8	1.08265	0.11457	0.00199734	abl-interactor 1	Abi1
19205	1434899_s_at	436.5	460.2	471.9	495.7	484.8	501.2	1.08264	0.114553	0.0303383	trinucleotide repeat containing 6a	Tnrc6a
8554	1424248_at	7506	7629.9	7521.7	8108.5	8061.6	8354.8	1.08241	0.114252	0.00325926	cyclic AMP-regulated phosphoprotein, 21	Arpp21
27	1415696_at	660.4	667.3	625	695.9	687.2	728.8	1.08153	0.113071	0.0436018	SAR1 gene homolog A (S. cerevisiae)	Sar1a
18617	1434311_at	232.5	229	229.5	246.2	249.9	250.9	1.08104	0.112423	0.000487464	CCR4-NOT transcription complex, subunit 6-like	Cnot6l
40871	1456576_x_at	490.9	497.4	506.5	535.2	535	545.6	1.08095	0.112296	0.00213328	CCR4-NOT transcription complex, subunit 2	Cnot2
37295	1453000_at	616.5	628.6	619.8	655.1	699.4	661.3	1.08092	0.112254	0.024574	calmodulin regulated spectrin-associated protein family, member 2	Camsap2
42285	1457990_at	448.1	440.8	423.9	481.2	481.1	455.8	1.08021	0.111312	0.0339271	ankyrin repeat and sterile alpha motif domain containing 1B	Anks1b
37053	1452758_s_at	3621.7	3635.6	3786.1	3919.4	3959.5	4049.1	1.0801	0.111168	0.0105926	eukaryotic translation initiation factor 4, gamma 2	Eif4g2
10783	1426477_at	333.9	328.3	345.5	367.7	347.1	373.5	1.07998	0.11101	0.047112	RAS p21 protein activator 1	Rasa1
22707	1438401_at	243.1	245.4	232	251.3	268.1	258.4	1.07953	0.110401	0.0403618	ubinuclein 1	Ubn1
11983	1427677_a_at	114	110.9	109.6	118	119.8	123.3	1.07952	0.110392	0.0120062	SRY (sex determining region Y)-box 6	Sox6
18350	1434044_at	229.5	228.9	228.9	246.3	248.2	247.3	1.0793	0.11009	6.36583e-06	replication initiator 1	Repin1
32613	1448313_at	785.5	806.3	760	856.1	812.9	868.8	1.07909	0.109813	0.0453017	tripeptidyl peptidase I	Tpp1
39247	1454952_s_at	218.4	219.2	224.1	244	236.6	233.3	1.07889	0.109545	0.00869616	non-SMC condensin II complex, subunit D3	Ncapd3
7839	1423533_a_at	525.2	538.6	513.5	586.3	549.1	565.9	1.07862	0.10918	0.0333287	ras homolog gene family, member T1	Rhot1
12608	1428302_at	388.2	375.7	379.3	391.1	422	419.3	1.07803	0.108393	0.0479889	mitochondrial ribosomal protein L48	Mrpl48
22030	1437724_x_at	1107.1	1074.1	1128.9	1163.8	1178.8	1224.5	1.07764	0.107877	0.0241007	phosphatidylinositol transfer protein, membrane-associated 1	Pitpnm1
1146	1416815_s_at	777.5	746.8	763.3	808.1	825.5	829.5	1.07672	0.10664	0.00608782	budding uninhibited by benzimidazoles 3 homolog (S. cerevisiae)	Bub3
40587	1456292_a_at	175.6	170.9	182.5	192.3	185.8	191.1	1.07599	0.105668	0.0267359	vimentin	Vim
19647	1435341_at	282.6	283.4	302.5	309.4	319.7	305.1	1.07565	0.105206	0.0486885	peptidyl-prolyl isomerase G (cyclophilin G)	Ppig
6874	1422568_at	1209.7	1198.9	1148.7	1270.1	1250.7	1305.4	1.07559	0.10513	0.0221514	nuclear distribution gene E-like homolog 1 (A. nidulans)	Ndel1
39539	1455244_at	405.5	392	400.4	445.3	416.9	426.1	1.07547	0.104961	0.031104	dishevelled associated activator of morphogenesis 1	Daam1
1166	1416835_s_at	1046.6	1039.1	1051.1	1112.7	1156.4	1103.5	1.07517	0.104568	0.00924127	S-adenosylmethionine decarboxylase 1	Amd1
20419	1436113_a_at	1588.5	1547.8	1594.6	1669.1	1764	1652.5	1.07498	0.104303	0.0350068	suppression of tumorigenicity 13	St13
5369	1421063_s_at	3107.5	2962.1	2923.1	3310.2	3227.1	3121.7	1.07409	0.103119	0.046945	small nuclear ribonucleoprotein N /// SNRPN upstream reading frame	Snrpn
12914	1428608_at	2747.8	2627.1	2531.8	2822.4	2830.1	2835.9	1.07357	0.102417	0.0363451	myosin, light chain 12B, regulatory	Myl12b
8651	1424345_s_at	297.9	294.3	289	316.4	323	306.6	1.07354	0.102371	0.0163319	ubiquitin-conjugating enzyme E2M	Ube2m
12220	1427914_a_at	1584.8	1621.1	1575	1749.1	1717.2	1658.1	1.07185	0.100101	0.0190806	transcription elongation factor B (SIII), polypeptide 1	Tceb1
18286	1433980_at	347.5	353.4	336.5	369	381.8	360	1.07075	0.0986268	0.0381848	K(lysine) acetyltransferase 5	Kat5
21190	1436884_x_at	911.2	979.6	922.2	989.5	1023.6	997.1	1.0701	0.0977498	0.0494916	Ewing sarcoma breakpoint region 1	Ewsr1
25675	1441369_at	389.3	368.6	382.7	404.2	403.9	412.2	1.06988	0.0974429	0.0164633	RIKEN cDNA C030017B01 gene	C030017B01Rik
7507	1423201_at	1259	1190.6	1252.9	1305	1334.5	1317.6	1.06876	0.0959438	0.0224249	nuclear receptor co-repressor 1	Ncor1
20876	1436570_at	433.1	429.2	451.3	460.3	458.4	483	1.06707	0.0936516	0.0480705	phosphoprotein associated with glycosphingolipid microdomains 1	Pag1
35312	1451017_at	353.4	353.5	341.9	371.7	367.4	379.6	1.06665	0.0930836	0.0113678	ERGIC and golgi 3	Ergic3
1589	1417258_at	1301.4	1259.7	1235.7	1303.5	1374.3	1369.6	1.066	0.0922114	0.048876	chaperonin containing Tcp1, subunit 5 (epsilon)	Cct5
10648	1426342_at	1217.4	1233.9	1192.5	1343.5	1263	1277.6	1.06595	0.0921366	0.0436987	STT3, subunit of the oligosaccharyltransferase complex, homolog B (S. cerevisiae)	Stt3b
19334	1435028_at	1167	1197.4	1158.5	1283.4	1243.3	1227.8	1.06574	0.0918573	0.0191881	WD repeat domain 7	Wdr7
40994	1456699_s_at	1076.5	1063.3	1080	1130.9	1185.8	1111.9	1.06485	0.0906485	0.037595	YTH domain containing 1	Ythdc1
9133	1424827_a_at	1678	1593.8	1623.1	1734.3	1746.6	1727.3	1.06401	0.0895055	0.0145481	casein kinase 1, alpha 1	Csnk1a1
35199	1450904_at	757.9	720.4	763.6	804.1	782.6	797.9	1.06365	0.0890254	0.0336919	transmembrane protein 167	Tmem167
22306	1438000_x_at	1234	1198.1	1232.4	1329.6	1262.1	1303.2	1.06287	0.0879699	0.0283339	zinc finger protein 622	Zfp622
29603	1445297_at	177.8	177.1	177.4	181.5	189.6	194.6	1.06275	0.0877976	0.0435542	syntaxin binding protein 5-like	Stxbp5l
32476	1448176_a_at	2061.8	2024.5	2013.6	2183.7	2185.9	2111.8	1.06254	0.0875199	0.0109839	heterogeneous nuclear ribonucleoprotein K	Hnrnpk
33259	1448959_at	617.8	631.1	640	658.7	690.2	658	1.06247	0.0874224	0.0339928	NADH dehydrogenase (ubiquinone) Fe-S protein 4	Ndufs4
12620	1428314_at	1909.6	1871.6	1913.7	2009.6	2008.3	2025.3	1.06116	0.0856422	0.00131023	PEST proteolytic signal containing nuclear protein	Pcnp
98	1415767_at	417.9	397.2	406.3	438.6	422.1	434.6	1.0605	0.0847505	0.0340203	YTH domain family 1	Ythdf1
18982	1434676_at	595.6	578.8	587.5	636.4	607.2	624.3	1.06016	0.0842852	0.0223605	myotubularin related protein 9	Mtmr9
23	1415692_s_at	2102.5	2089.3	2104.3	2195.4	2201	2258.8	1.05704	0.0800236	0.00452875	calnexin	Canx
21774	1437468_x_at	3026.2	2943.4	3004.4	3075.7	3237.3	3121.1	1.05127	0.0721337	0.0471729	F-box and WD-40 domain protein 11	Fbxw11
21241	1436935_x_at	1919.2	1908	1894.7	2041.8	1975.3	1979.8	1.04806	0.0677226	0.0153859	chloride channel, nucleotide-sensitive, 1A	Clns1a
7928	1423622_a_at	552.6	567.6	550.2	592.5	578.7	572.7	1.044	0.0621237	0.0375667	cyclin L1	Ccnl1
32508	1448208_at	263.6	261.7	263.2	270.8	274.9	270.9	1.03564	0.0505188	0.00310293	SMAD family member 1	Smad1
611	1416280_at	933.3	945.8	924.9	965.5	972.1	963.1	1.03449	0.0489147	0.00831881	ubiquitin-like modifier activating enzyme 2	Uba2
8064	1423758_at	2050.3	2021	2001.6	2071.8	2096.9	2099.6	1.03218	0.0456886	0.0175193	GTPase activating protein (SH3 domain) binding protein 2	G3bp2
18689	1434383_at	4179.8	4222.6	4263.1	4109.7	4143.3	4158.9	-1.02043	-0.0291801	0.0395792	praja 2, RING-H2 motif containing	Pja2
36563	1452268_at	366.2	357.5	362.5	356.9	347.2	347.3	-1.0331	-0.0469781	0.0469445	family with sequence similarity 76, member B	Fam76b
22253	1437947_x_at	1911.3	1893	1872.4	1832.2	1832.2	1786.8	-1.04137	-0.0584786	0.0162929	voltage-dependent anion channel 1	Vdac1
1291	1416960_at	203.7	200.2	200.8	197.5	188.2	192.8	-1.04529	-0.0639026	0.0392526	beta-1,3-glucuronyltransferase 3 (glucuronosyltransferase I)	B3gat3
11136	1426830_a_at	2752.4	2715.7	2637.5	2591.4	2588.3	2560.8	-1.04717	-0.0664922	0.0259959	S-adenosylhomocysteine hydrolase-like 1	Ahcyl1
13620	1429314_at	1708.3	1762.1	1742.6	1645.4	1686.3	1640.8	-1.04837	-0.0681425	0.0199046	synaptotagmin XI	Syt11
25101	1440795_x_at	259.7	265.7	258.3	250.5	253.1	243.8	-1.04857	-0.0684209	0.0278193	rabaptin, RAB GTPase binding effector protein 2	Rabep2
40245	1455950_x_at	3680.5	3799.8	3776.1	3525.7	3516	3678.4	-1.05003	-0.0704271	0.0491409	ribosomal protein L35	Rpl35
8491	1424185_a_at	3986.8	4038.6	3948.1	3733.7	3826	3817.3	-1.05243	-0.0737247	0.00725453	mortality factor 4 like 1 pseudogene /// predicted gene 6747 /// mortality factor 4 like 1	A730098P11Rik
2899	1418568_x_at	1170.2	1213.1	1168.4	1113.8	1130.2	1127.5	-1.05345	-0.0751191	0.0177849	signal recognition particle 14	Srp14
17903	1433597_at	1336.1	1373.8	1369.6	1268.6	1310.8	1289.7	-1.05438	-0.0763943	0.0146904	arginine and glutamate rich 1	Arglu1
35206	1450911_at	1254.1	1251.2	1200.7	1162.7	1151.9	1189.4	-1.05765	-0.0808601	0.0308763	peptidylprolyl isomerase B	Ppib
311	1415980_at	1588.8	1543.2	1543.6	1432.1	1475.5	1511.2	-1.05812	-0.0814969	0.0354804	ATP synthase, H+ transporting, mitochondrial F0 complex, subunit C2 (subunit 9)	Atp5g2
21134	1436828_a_at	202.7	197.8	199.1	185.9	185.6	194.9	-1.05862	-0.0821791	0.0308069	tumor protein D52-like 2	Tpd52l2
12770	1428464_at	2227.5	2208.1	2122.6	2027.3	2082.5	2081.7	-1.05923	-0.0830109	0.0299368	NADH dehydrogenase (ubiquinone) 1 alpha subcomplex, 3	Ndufa3
35113	1450818_a_at	1886.7	1834.9	1839.6	1789	1734.4	1712.2	-1.06219	-0.0870413	0.0182844	NADH dehydrogenase (ubiquinone) 1 alpha subcomplex, 7 (B14.5a)	Ndufa7
726	1416395_at	577	551.5	565.3	539.2	536.1	518.1	-1.06301	-0.0881551	0.0275821	guanylate kinase 1	Guk1
1159	1416828_at	9484.6	9640.7	9601.9	8796.1	8888.5	9334.1	-1.06323	-0.0884591	0.0299412	synaptosomal-associated protein 25	Snap25
32827	1448527_at	947.2	937.8	898.7	846.1	885	883.7	-1.06459	-0.0903031	0.0451972	programmed cell death 10	Pdcd10
33270	1448970_at	959.1	982.1	1020.9	921.7	907.4	948.1	-1.06658	-0.0929893	0.0463444	solute carrier family 25, member 46	Slc25a46
33209	1448909_a_at	1025.9	1023.2	974	944.4	937.2	952	-1.06688	-0.0933926	0.0221579	mitochondrial ribosomal protein L39	Mrpl39
40911	1456616_a_at	2032.1	2048.6	2010.4	1937.4	1893	1877	-1.06723	-0.0938691	0.00379482	basigin	Bsg
18740	1434434_s_at	633.4	643.9	638.9	580.3	611.1	598.9	-1.07032	-0.0980468	0.011344	transcription elongation regulator 1 (CA150)	Tcerg1
32742	1448442_a_at	2211.7	2267.3	2217	2016	2161.5	2071.5	-1.07153	-0.0996742	0.0315878	proteasome (prosome, macropain) subunit, alpha type 3	Psma3
32747	1448447_at	1138.7	1099.3	1120.6	1049.1	1040.2	1044.6	-1.0717	-0.0999008	0.00303146	vacuolar protein sorting 28 (yeast)	Vps28
25983	1441677_at	25.9	25	24.4	23.5	23	23.7	-1.07265	-0.101179	0.0244647
5258	1420952_at	1655.8	1575.4	1614.5	1472.3	1487.7	1557.5	-1.07265	-0.10118	0.0353719	Son DNA binding protein	Son
11303	1426997_at	226.3	221.1	228.8	214.8	209.3	206.3	-1.07265	-0.101182	0.0105453	thyroid hormone receptor alpha	Thra
892	1416561_at	6417.2	6340.3	6611.2	5952.4	6104.7	5977.8	-1.07396	-0.102936	0.00888985	glutamate decarboxylase 1	Gad1
20273	1435967_s_at	747.8	779.2	760.9	711.8	685.9	731.5	-1.07454	-0.103713	0.029986	3-hydroxyisobutyrate dehydrogenase	Hibadh
10522	1426216_at	267.2	282.8	263.3	247.8	253.4	255.2	-1.07522	-0.104638	0.0406583	component of oligomeric golgi complex 6	Cog6
13337	1429031_at	188.9	186	188	174.4	177.9	171.2	-1.07526	-0.104689	0.0034286	RIKEN cDNA 4833408D11 gene	4833408D11Rik
3971	1419640_at	555.7	594.2	568.3	534.8	530.3	531.7	-1.07603	-0.105714	0.0238756	purine rich element binding protein B	Purb
22946	1438640_x_at	2701	2570.8	2671.8	2409.8	2546.3	2425.2	-1.07618	-0.105918	0.0327271	phosphoglycerate kinase 1	Pgk1
44882	1460590_s_at	3246.9	3192.7	3408.7	3081	3098.4	2966	-1.07686	-0.106828	0.0383529	tyrosine 3-monooxygenase/tryptophan 5-monooxygenase activation protein, theta polypeptide	Ywhaq
44079	1459784_x_at	218.1	232	222.3	201.2	209.5	213.4	-1.07739	-0.107543	0.0421689	lon peptidase 2, peroxisomal	Lonp2
21206	1436900_x_at	260.9	265.6	262	246	238.9	246.8	-1.07763	-0.107858	0.00278545	leptin receptor overlapping transcript	Leprot
21719	1437413_x_at	9497.3	9840.1	9494.8	8741.1	8648.1	9289.1	-1.08074	-0.112014	0.0357184	ribosomal protein S29	Rps29
12381	1428075_at	1831	1870.1	1818.2	1689.3	1664.6	1746.5	-1.08213	-0.113875	0.00839431	predicted pseudogene 3244 /// predicted gene 3873 /// NADH dehydrogenase (ubiquinone) 1 beta subcomplex 4	Ndufb4
45031	1460740_at	268.7	248.2	256.3	240.8	238.3	234.8	-1.08306	-0.11512	0.0334354	clathrin, light polypeptide (Lcb)	Cltb
1488	1417157_at	761.3	764.7	723.1	670.1	715.2	689.8	-1.08385	-0.116167	0.0359421	ARP10 actin-related protein 10	Actr10
1030	1416699_at	703.9	699.8	710	652.2	662	634.9	-1.08445	-0.116963	0.00291213	RIKEN cDNA 1110008F13 gene	1110008F13Rik
29798	1445492_at	165	164	168.2	159	152.6	146.5	-1.08535	-0.118164	0.0270837
22150	1437844_x_at	389.6	361.5	374.5	349.1	334.2	353.3	-1.08586	-0.118835	0.0409797	component of oligomeric golgi complex 1 /// conserved oligomeric Golgi complex subunit 1-like	Cog1
658	1416327_at	765.5	768.1	792.5	689	707.1	744.9	-1.08645	-0.119628	0.0293462	ubiquitin-fold modifier conjugating enzyme 1	Ufc1
1051	1416720_at	307.5	311.2	308.6	276.2	281.6	295.5	-1.08672	-0.119983	0.0135343	serine/arginine-rich splicing factor 6	Srsf6
[truncated: 1,881 more rows]

## Sheet: KEGG of upregulated genes
Term	Overlap	P-value	Adjusted P-value	Odds Ratio	Combined Score	Genes
[truncated: 277 more rows]
